# Supplementary material for: A novel deep proteomic approach in human skeletal muscle unveils distinct molecular signatures affected by aging and resistance training
Source: Aging (Albany NY). 2024 Apr 19;16(8):6631–51. doi: 10.18632/aging.205751 (PMC11087122; doi:10.18632/aging.205751)
Supplement: Supplementary Table 1 [file aging-16-205751-s001.xlsx]

## Sheet: Sheet1
Supplementary Table 1. Raw MyoF data from Y and MA participants.
Gene	Protein	Young64	Young47	Young67	Young15	Young24	PRE_MA32	PRE_MA30	PRE_MA19	PRE_MA17	PRE_MA05	PRE_MA03	POST_MA32	POST_MA30	POST_MA19	POST_MA17	POST_MA05	POST_MA03
A1BG	Alpha-1B-glycoprotein	0	0	0	0	0	0	0	0	0	0	0	0	0	10.7307	0	0	0
A2M	Alpha-2-macroglobulin	37.6379	8.32206	16.5888	0	6.56431	12.1193	65.0556	12.2063	12.3326	14.6615	108.991	11.59	7.15574	12.6598	5.51476	18.2572	15.231
AAAS	Aladin	0	0	0	0	0	0	0	0	0	0	0	0	5.17433	0	0	0	3.76295
AACS	Acetoacetyl-CoA synthetase	0	0	0	0	0	2.82278	0	0	0	0	0	0	0	0	0	0	0
AAK1	AP2-associated protein kinase 1;Isoform of Q2M2I8, Isoform 2 of AP2-associated protein kinase 1	5.06087	5.93104	0	0	0	0	0	0	0	0	0	0	0	0	0	0	0
AAMDC	Mth938 domain-containing protein	48.0314	35.7052	57.0972	45.9795	27.1262	30.0177	32.7254	51.533	24.3588	37.8684	48.0275	42.8629	26.306	53.9669	24.1895	30.6009	28.8355
AAMP	Angio-associated migratory cell protein	0	0	0	0	0	0	0	0	0	0	0	7.4745	0	0	0	0	0
AAR2	Protein AAR2 homolog	0	0.727664	0	0	0	0	0	0	0	0	0	0	0	0	0	0	0
AARS1	Alanine--tRNA ligase, cytoplasmic	79.7857	33.4758	17.6082	16.9498	25.3506	7.81947	0	0	13.6382	8.64325	0	0	34.9265	0	0	19.1133	15.3967
AARS2	Alanine--tRNA ligase, mitochondrial	0	0	0	0	3.92364	0	0	0	0	0	0	0	0	1.97527	0	0	0
AASDHPPT	L-aminoadipate-semialdehyde dehydrogenase-phosphopantetheinyl transferase	138.524	0	0	0	0	0	0	0	0	0	0	0	0	382.849	0	0	0
AASS	Alpha-aminoadipic semialdehyde synthase, mitochondrial	0	3.79429	0	0	0	0	0	0	0	14.7054	0	0	0	0	0	0	0
ABCA5	Cholesterol transporter ABCA5	20.617	1.22217	0	9.89155	0	0	4.04189	7.62756	0	4.34688	4.07746	4.26169	0.804553	18.4896	0	0	0
ABCA8	ABC-type organic anion transporter ABCA8	0	0	0	0	0	0	0	0	0	0	0	0	1.43898	0	0	0	0
ABCB10	ATP-binding cassette sub-family B member 10, mitochondrial	14.0031	10.5811	0	15.1972	0	0	11.1991	16.9584	2.31609	10.2395	17.8152	8.55425	0	3.26985	0	6.07064	0
ABCB6	ATP-binding cassette sub-family B member 6;Isoform of Q9NP58, Isoform 2 of ATP-binding cassette sub-family B member 6	0	4.11463	0	4.83687	1.23137	0	0	24.3717	0	6.43987	0	2.45857	16.5369	0	0	9.63684	0
ABCB7	Iron-sulfur clusters transporter ABCB7, mitochondrial;Isoform of O75027, Isoform 2 of Iron-sulfur clusters transporter ABCB7, mitochondrial	24.2229	14.2702	12.3656	42.9996	12.508	8.55219	0	76.5748	6.38493	29.1056	16.8457	11.8381	9.04179	0	9.90437	53.056	13.5341
ABCC1	Multidrug resistance-associated protein 1;Isoform of P33527, Isoform 9 of Multidrug resistance-associated protein 1	0	3.18589	76.8271	6.54733	0	0	15.233	0	0	0	0	0	0	17.3192	0	12.9848	0
ABCC4	ATP-binding cassette sub-family C member 4	0	5.92695	5.92695	5.92695	0	0	0	0	0	0	163.716	0	0	0	0	0	0
ABCC9	ATP-binding cassette sub-family C member 9	114.769	9.31603	9.31603	41.4061	17.029	0	22.4949	63.0356	9.85726	21.2411	35.9244	0	11.7884	18.8985	12.7652	83.394	0
ABCD3	ATP-binding cassette sub-family D member 3	5.60306	0	0	11.8594	0	0	1.97963	12.7816	0	3.9091	4.55502	0	0	5.20628	0	0	0
ABCE1	ATP-binding cassette sub-family E member 1	15.8535	11.0594	6.49254	17.5293	7.55421	9.18708	10.4468	9.79683	7.33257	14.9272	23.7788	16.5113	8.12558	16.6313	9.7057	35.0457	11.239
ABCF1	ATP-binding cassette sub-family F member 1	139.067	180.481	180.1	89.0152	252.982	266.242	98.6699	125.022	175.896	209.98	50.3837	174.294	205.426	128.064	213.908	531.906	144.853
ABCF2	ATP-binding cassette sub-family F member 2;Isoform of Q9UG63, Isoform 2 of ATP-binding cassette sub-family F member 2	24.156	7.32033	16.8002	22.1189	8.04987	10.085	16.7836	17.7331	6.10318	16.0132	24.4394	13.4395	6.67812	22.1221	6.36248	13.5748	9.63226
ABCF3	ATP-binding cassette sub-family F member 3	0	6.43622	8.3467	0	1.4504	0	0	0	0	4.00846	0	0	0	0	0	0	0
ABHD10	Palmitoyl-protein thioesterase ABHD10, mitochondrial	0	6.85064	0	11.1036	4.73466	7.04494	0	0	3.05461	10.1316	42.6373	0	5.17791	0	0	6.99415	4.53658
ABHD11	Protein ABHD11	0	4.39168	3.31906	3.9497	4.78287	3.55777	0	0	3.50474	7.45036	0	0	8.91568	0	5.66665	10.4192	7.6547
ABHD14B	Putative protein-lysine deacylase ABHD14B	0	0	0	0	0	0	0	0	0	0	7.39418	0	0	0	0	0	0
ABHD16A	Phosphatidylserine lipase ABHD16A	14.9357	2.44473	8.66991	21.7402	3.10806	0	12.8643	27.1385	1.5594	14.9685	17.5182	7.14467	3.0113	14.3162	1.00052	0	8.37584
ABHD2	Monoacylglycerol lipase ABHD2	0	0	0	3.73821	0	0	0	0	0	0	0	0	0	0	0	0	0
ABHD5	1-acylglycerol-3-phosphate O-acyltransferase ABHD5	0	2.91428	2.91428	2.91428	2.23403	0	0	0	0	0	0	0	3.46541	0	0	0	0
ABI1	Abl interactor 1;Isoform of Q8IZP0, Isoform 10 of Abl interactor 1;Isoform of Q8IZP0, Isoform 2 of Abl interactor 1;Isoform of Q8IZP0, Isoform 3 of Abl interac	0	0	0	0	0	4.38407	0	0	0	0	0	0	0	0	0	0	0
ABI3BP	Target of Nesh-SH3	0	25.0283	0	0	41.4943	2.05011	0	28.3652	0	46.1293	0	51.4141	23.7604	0	0	14.8948	19.7755
ABLIM1	Isoform of O14639, Isoform 2 of Actin-binding LIM protein 1;Isoform of O14639, Isoform 6 of Actin-binding LIM protein 1	2.51435	6.60893	6.60893	6.60893	1.9386	4.83813	7.45907	8.60767	2.64093	18.496	8.24309	12.9742	5.0834	8.81713	3.54753	14.5357	8.51782
ABLIM2	Isoform of Q6H8Q1, Isoform 9 of Actin-binding LIM protein 2	16.8355	19.4998	15.22	11.4806	13.536	13.4641	16.043	21.6414	14.7726	13.2001	16.4888	13.5982	13.4417	16.9366	15.1994	24.9192	26.7441
ABLIM2;ABLIM2	Isoform of Q6H8Q1, Actin-binding LIM protein 2;Isoform of Q6H8Q1, Actin-binding LIM protein 2	8.45718	9.98001	15.9998	12.5506	9.48612	4.87391	15.5986	0	3.24456	6.20979	0	8.44271	3.93056	9.53295	4.84983	6.97164	4.11082
ABLIM3	Actin-binding LIM protein 3	0	7.84207	16.0552	16.0552	10.1435	12.6905	0	18.1295	12.7337	31.9431	24.2991	14.7293	7.19871	25.8004	9.47385	14.1493	15.2521
ABRA	Actin-binding Rho-activating protein	98.6791	0	1.88719	2.86724	0	0	6.00599	5.14264	0	0	3.82728	1.91329	0	2.25958	0	0	0
ABRAXAS2	BRISC complex subunit Abraxas 2	10.0653	5.7429	10.0604	0	3.05484	3.05828	0	0	0	6.70467	0	8.41748	4.1367	0	2.07935	4.49298	4.48155
ABTB2	Ankyrin repeat and BTB/POZ domain-containing protein 2	0	13.6091	0	0	8.95136	6.67694	0	0	11.7613	0	0	0	5.58283	0	8.1795	20.2878	9.57918
ACAA1	3-ketoacyl-CoA thiolase, peroxisomal	6.04262	0	13.3295	12.2142	5.22864	9.77636	7.15459	18.3944	7.29888	8.41351	0	10.1457	8.05851	9.92264	6.57244	24.4025	5.87798
ACAA2	3-ketoacyl-CoA thiolase, mitochondrial	10.1865	17.4113	13.1073	10.4487	7.51777	8.77965	0	14.4439	5.08342	26.9946	17.1234	9.12813	7.33423	9.05164	8.01912	17.5726	11.6769
ACACA	Isoform of Q13085, Isoform 2 of Acetyl-CoA carboxylase 1	0	0	0	0	0	0	0	0	0	0	0	0	0	1.3534	0	0	0
ACACB	Acetyl-CoA carboxylase 2	10.8799	7.13561	7.13561	13.3188	2.91198	4.36996	0	9.43813	22.027	1.79671	0	3.53738	0	7.37951	2.38192	25.9738	3.00489
ACAD10	Acyl-CoA dehydrogenase family member 10;Isoform of Q6JQN1, Isoform 5 of Acyl-CoA dehydrogenase family member 10	0	0	0	0	0	0	0	0	0	0	0	0	3.52334	0	0	0	0
ACAD8	Isobutyryl-CoA dehydrogenase, mitochondrial	15.0913	20.2316	15.5137	10.171	9.26379	13.194	11.6892	25.7446	14.5665	51.961	28.7005	27.8536	16.0492	33.1686	16.3579	25.5761	32.0279
ACAD9	Complex I assembly factor ACAD9, mitochondrial	15.133	8.86402	4.05242	0	4.28044	4.35389	49.2589	3.16946	1.07339	7.74243	0	9.00082	12.4438	7.51843	0	5.65894	8.56107
ACADM	Isoform of P11310, Medium-chain-specific acyl-CoA dehydrogenase, mitochondrial	0	6.9013	1.57839	6.9013	0	0.508133	0	0	0	0	0	0	2.18552	0	0	0	2.06076
ACADM	Medium-chain specific acyl-CoA dehydrogenase, mitochondrial;Isoform of P11310, Isoform 2 of Medium-chain specific acyl-CoA dehydrogenase, mitochondrial	143.029	260.874	157.295	157.24	59.4824	48.7615	86.0171	124.677	30.1409	91.8919	116.84	60.5594	118.346	124.717	43.9467	90.7057	103.212
ACADS	Short-chain specific acyl-CoA dehydrogenase, mitochondrial	64.8374	69.204	66.7597	53.1207	29.8187	19.8234	6.05041	36.6679	7.45	87.5139	25.6148	34.8082	13.9301	32.91	17.1999	63.7433	22.1732
ACADSB	Short/branched chain specific acyl-CoA dehydrogenase, mitochondrial	21.1167	30.3201	13.1345	47.9694	5.69362	8.74133	116.704	15.3104	3.92425	33.3409	11.4127	13.931	9.64838	0	8.08401	20.3205	13.2169
ACADVL	Very long-chain specific acyl-CoA dehydrogenase, mitochondrial;Isoform of P49748, Isoform 3 of Very long-chain specific acyl-CoA dehydrogenase, mitochondrial	214.302	237.92	131.709	118.84	113.786	182.59	41.5992	93.0006	67.6949	94.119	77.4623	79.1921	151.969	72.9671	126.191	384.888	92.3907
ACAT1	Acetyl-CoA acetyltransferase, mitochondrial	206.788	207.029	307.691	208.384	163.376	212.95	113.158	290.861	115.546	407.453	345.215	199.702	203.871	253.354	164.826	710.779	221.171
ACAT1	Isoform of P24752, Acetyl-CoA acetyltransferase, mitochondrial	0	0.951987	0.951987	1.3714	1.60949	0.813162	0	0	0	1.24674	0	0	1.1544	0	0.640511	0.896468	0.971467
ACBD3	Golgi resident protein GCP60	0	3.15886	0	0	0	0	0	0	0	97.0236	0	0	0	0	0	3.05235	7.76476
ACBD5	Isoform of Q5T8D3, Isoform 2 of Acyl-CoA-binding domain-containing protein 5;Isoform of Q5T8D3, Isoform 3 of Acyl-CoA-binding domain-containing protein 5;Isoform of Q5T8D3, Isoform 4 of Ac	0	0	0	0	0	0.685926	0	0	0	0	0	0	0	0	0	0	0
ACHE	Acetylcholinesterase	24.3235	5.50593	12.7325	6.60335	4.16091	10.7889	6.73418	11.5235	5.09162	6.71703	0	14.7463	3.65472	5.91871	11.7497	5.98873	5.98864
ACIN1	Apoptotic chromatin condensation inducer in the nucleus	13.7539	0	0	0	10.3726	0	0	32.7481	0	0	0	0	18.4652	0	8.36617	15.9821	0
ACLY	ATP-citrate synthase	0	2.56762	0	0	3.1966	0	0	0	0	0	0	7.39234	3.66062	0	4.4702	0	4.32144
ACO1	Cytoplasmic aconitate hydratase	17.0108	19.7893	18.7895	26.8698	6.47722	3.83599	25.263	21.7313	4.41018	18.4449	33.6426	11.1041	5.43944	0	4.96508	13.1442	7.09624
ACO2	Aconitate hydratase, mitochondrial	645.989	1475.81	660.259	932.103	551.809	441.649	294.839	850.718	310.639	1075.67	622.716	614.726	1001.05	477.01	537.683	1007.01	984.075
ACOT1	Acyl-coenzyme A thioesterase 1	17.9732	74.5471	60.7736	46.9531	19.8833	11.3026	0	43.8213	20.5995	44.4199	25.0836	35.6765	35.6742	59.2144	11.1822	42.1245	26.3529
ACOT11	Isoform of Q8WXI4, Isoform 2 of Acyl-coenzyme A thioesterase 11	0	1.08002	0	0	0	0	0	0	0	0	0	0	0	0	0	0	2.18438
ACOT13	Acyl-coenzyme A thioesterase 13;Isoform of Q9NPJ3, Isoform 2 of Acyl-coenzyme A thioesterase 13	0	0	0	0	0	0	0	0	0	0	0	0	0	0	0	2.02971	0
ACOT2	Acyl-coenzyme A thioesterase 2, mitochondrial	36.0517	81.0459	42.1032	68.5432	30.157	20.6147	18.1838	92.1055	10.1334	68.8299	44.268	43.0112	55.4695	49.5253	17.7103	51.1369	40.228
ACOT8	Acyl-coenzyme A thioesterase 8	9.28807	2.60814	2.60814	2.60814	1.13289	2.73765	0	0	0	5.96592	0	4.20128	0	0	2.82115	2.92708	2.49418
ACOT9	Acyl-coenzyme A thioesterase 9, mitochondrial	18.9507	18.2235	18.8458	22.0477	8.7034	7.57316	9.86017	16.2887	7.51547	12.989	20.1553	9.95593	12.127	11.0262	9.17544	91.7772	13.9421
ACOX2	Peroxisomal acyl-coenzyme A oxidase 2	0	0	0	0	0	0	0	0	0	0	0	0	0	0	0	2.06555	0
ACP1	Isoform of P24666, Isoform 2 of Low molecular weight phosphotyrosine protein phosphatase	0	1.91483	1.91483	1.91483	0	0	0	0	0	0	0	0	0	0	0	0	0
ACP1	Low molecular weight phosphotyrosine protein phosphatase	41.4883	58.1207	42.8464	60.8645	24.9683	30.0315	35.4066	55.0916	55.8542	55.8569	36.846	47.324	46.8117	23.6552	85.6104	170.151	42.9169
ACSF2	Medium-chain acyl-CoA ligase ACSF2, mitochondrial;Isoform of Q96CM8, Isoform 2 of Medium-chain acyl-CoA ligase ACSF2, mitochondrial;Isoform of Q96CM8, Isoform 3 of Medium-chain acyl-CoA	0	0	0	0	0	0.88895	0	0	0	0	0	0	0	0	0	0	0
ACSF3	Malonate--CoA ligase ACSF3, mitochondrial	0	0	0	0	2.03511	0	0	0	0	3.81134	0	0	0	0	1.29995	2.62322	0
ACSL1	Long-chain-fatty-acid--CoA ligase 1	311.047	271.788	297.999	491.999	174.136	190.273	127.434	248.763	88.768	180.043	272.013	166.181	223.591	169.055	169.678	169.369	136.593
ACSL3	Fatty acid CoA ligase Acsl3	175.843	27.4303	27.0218	55.9067	19.9062	17.9216	40.0023	33.2879	16.6478	19.2742	26.4844	22.6873	27.8583	30.3268	22.0306	32.5713	21.4995
ACSL4	Long-chain-fatty-acid--CoA ligase 4;Isoform of O60488, Isoform Short of Long-chain-fatty-acid--CoA ligase 4	0	0	0	0	41.0288	0	0	0	0	36.6756	0	0	0	0	0	0	0
ACSL6	Isoform of Q9UKU0, Isoform 5 of Long-chain-fatty-acid--CoA ligase 6	0	0	18.3829	0	0	53.5892	4.65462	24.2095	6.63829	14.1409	0	0	0	10.4334	0	0	0
ACSM5	Acyl-coenzyme A synthetase ACSM5, mitochondrial	0	0	0	0	0	0	0	0	0	4.56749	0	0	0	0	0	0	0
ACSS1	Acetyl-coenzyme A synthetase 2-like, mitochondrial;Isoform of Q9NUB1, Isoform 2 of Acetyl-coenzyme A synthetase 2-like, mitochondrial	0	6.87751	0	6.49926	6.9277	3.24099	0	0	3.00301	6.49946	0	0	11.6911	0	4.65722	4.94806	9.55715
ACSS2	Isoform of Q9NR19, Isoform 2 of Acetyl-coenzyme A synthetase, cytoplasmic	363.099	43.9877	86.2015	88.6879	37.2382	69.643	37.6344	318.629	0	33.7192	0	100.388	0	0	31.6102	36.8158	47.5147
ACSS3	Acyl-CoA synthetase short-chain family member 3, mitochondrial	0	1.69915	0	0	0	0	0	0	4.18655	0	0	0	2.96657	0	3.72415	0	2.01571
ACTA1	Actin, alpha skeletal muscle	229523	135435	207785	144332	76293.7	93063.1	147872	175665	90044.3	149409	152788	180751	76534	193476	90017.4	116556	139903
ACTA1	Isoform of P68133, Actin, alpha skeletal muscle	0	170.935	122.833	80.4941	59.1819	91.3014	74.9005	103.63	56.9058	47.4654	51.7595	75.4539	56.8924	65.8305	91.6277	50.3773	115.247
ACTBL2	Beta-actin-like protein 2	470.355	317.125	433.925	491.772	169.586	217.059	399.103	559.997	185.377	344.57	292.88	331.346	164.117	503.996	189.028	265.36	329.783
ACTG1	Actin, cytoplasmic 2	2096.16	714.218	470.776	492.566	305.907	358.243	288.061	474.991	436.673	340.939	483.604	492.586	371.411	565.623	498.915	705.886	1786.19
ACTG1	Isoform of P63261, Actin, cytoplasmic 2	0	0	0	0	0	0	0	0	0	0	0	0	0	0	0	38.0833	0
ACTG2	Actin, gamma-enteric smooth muscle	581.601	576.144	490.924	297.416	282.351	320.315	270.324	433.297	330.869	674.803	389.215	811.674	264.578	665.928	303.757	957.932	810.827
ACTL6A	Actin-like protein 6A	0	0	0	0	0	0	0	0	18.3086	0	0	0	0	0	0	0	0
ACTN1	Isoform of P12814, Isoform 3 of Alpha-actinin-1	7.80055	9.88851	9.26221	5.68413	10.2421	12.2596	6.42073	11.4627	11.2942	12.4445	9.98827	8.9183	7.59197	10.5227	11.011	12.5613	14.9083
ACTN2	Alpha-actinin-2	2241.95	7563.64	6094.17	4465.44	4861.71	7469.26	5656.98	7648.67	5728.7	6347.13	9119.9	6355.97	6389.32	5609.54	6685.39	6364.07	5284.8
ACTN3	Alpha-actinin-3	180.478	276.523	338.466	586.225	187.884	428.132	801.65	600.462	175.572	98.964	1382.26	614.302	532.175	593.646	157.335	165.628	657.095
ACTN4	Alpha-actinin-4	224.97	38.6929	473.167	568.282	58.7609	97.449	776.398	575.686	124.841	73.9566	1093.93	92.5938	55.2656	642.284	95.7914	51.0193	79.3649
ACTR10	Actin-related protein 10	0	0	0	0	4.40746	5.46736	0	0	3.94781	0	0	4.05865	5.64878	3.69511	0	8.05072	0
ACTR1A	Alpha-centractin	84.1832	73.6768	82.5495	55.7396	31.0162	38.6881	51.4262	65.4012	27.2243	55.0272	57.9816	65.7782	33.0487	69.5068	35.9689	71.0125	61.9624
ACTR1B	Beta-centractin	12.0928	9.14178	10.0673	0	4.58236	6.09084	8.5543	3.52197	5.0033	7.69444	7.55945	10.7965	5.2973	9.51102	4.52508	13.5561	10.1421
ACTR2	Actin-related protein 2	20.4515	16.9719	14.3059	25.7789	6.87051	6.89568	12.5021	17.8437	11.0983	15.9653	34.6889	12.5887	10.3456	15.1052	8.74232	87.5255	27.2978
ACTR3	Actin-related protein 3	6.48971	7.6038	7.69865	12.4556	8.71944	8.42708	14.3049	17.0249	14.8853	14.4071	22.1559	14.128	13.4665	9.4412	8.59462	28.2576	24.0729
ACVR2A	Activin receptor type-2A;Isoform of P27037, Isoform 2 of Activin receptor type-2A	0	0	0	0	0	1.07616	0	0	0	0	4.44826	0	1.16454	0	0	1.38942	0
ACY1	Aminoacylase-1	14.9701	16.1336	7.50092	15.9428	13.4119	3.71003	0	0	0	6.85768	0	0	18.6447	0	4.33438	25.2078	15.6721
ACYP2	Acylphosphatase-2	17.9567	46.8523	10.9425	8.90972	27.6178	39.3167	17.9178	26.8526	10.5186	23.1035	4.3012	52.4302	17.6098	13.1289	30.7629	34.9812	41.6992
ADAMTS19	A disintegrin and metalloproteinase with thrombospondin motifs 19	19.1746	19.8807	19.8342	5.76055	16.6222	16.3221	14.1672	21.7613	19.4561	29.1593	12.9178	31.2235	14.4263	39.2398	10.4599	36.4028	29.1493
ADAMTSL4	ADAMTS-like protein 4;Isoform of Q6UY14, Isoform 3 of ADAMTS-like protein 4	0	0	3.93473	0	0	0	0	4.12179	0	3.00177	0	0	0	2.5464	0	0	0
ADCK5	Uncharacterized aarF domain-containing protein kinase 5	0	0	0	0	0	0	0	87.415	46.0316	0	0	0	0	0	0	0	0
ADCY2	Adenylate cyclase type 2	0	0	6.27935	0	0	0	0	0	0	1.59213	0	0	0	0	0	0	0
ADCY9	Adenylate cyclase type 9	0	0	0	0	0	0	0	0	0	7.03359	0	0	0	0	0	0	0
ADD1	Alpha-adducin;Isoform of P35611, Isoform 2 of Alpha-adducin;Isoform of P35611, Isoform 3 of Alpha-adducin;Isoform of P35611, Isoform 6 of Alpha-adducin	3.18879	0	0	0	0	27.7062	79.1015	0	0	0	0	0	4.54836	0	0	0	35.3613
ADD2	Beta-adducin	0	0	0	0	0	0	0	0	0	0	0	0	0	0	0.260992	6.83966	1.3475
ADD3	Isoform of Q9UEY8, Isoform 1 of Gamma-adducin	0	0	0	0	0	4.1541	0	0	0	0	0	0	2.00334	21.7034	0	2.96985	4.53867
ADGRL2	Isoform of O95490, Isoform 4 of Adhesion G protein-coupled receptor L2	0	0	0	0	0	0	0	0	0	0	0	0	0	0	0	2.21123	0
ADGRV1	Adhesion G-protein coupled receptor V1	0	0	20.1611	30.9075	13.5484	16.405	0	17.9137	9.38764	17.3811	0	14.1248	19.9138	0	22.6896	21.1512	25.511
ADH1B	All-trans-retinol dehydrogenase [NAD(+)] ADH1B	5.53128	30.5866	0	0	0	37.8336	27.27	16.4356	0	23.3334	53.3077	38.0436	13.7327	6.98437	0	54.9838	58.5232
ADH1C	Alcohol dehydrogenase 1C	17.2514	0	0	21.2894	0	8.73127	20.1319	24.1483	0	0	25.4326	0	0	0	0	0	0
ADH5	Alcohol dehydrogenase class-3	226.113	0	0	532.064	0	12.6934	21.178	0	0	7.24898	7.69644	0	6.8211	0	6.79402	0	6.03015
ADHFE1	Hydroxyacid-oxoacid transhydrogenase, mitochondrial	100.329	38.2059	18.3449	0	22.8133	5.69741	380.351	63.7508	4.57885	49.6566	451.846	10.7394	24.0688	91.396	11.6232	16.1635	18.6908
ADI1	Acireductone dioxygenase	0	3.75432	3.75432	3.75432	0	0	0	0	0	0	0	8.50907	0	0	0	9.8477	0
ADIPOQ	Adiponectin	0	5.39301	6.02857	6.73076	4.39025	3.17013	0	0	3.12145	4.91108	0	0	6.64591	0	2.56287	5.3056	2.67749
ADISSP	Isoform of Q9GZN8, Isoform 2 of UPF0687 protein C20orf27	0	0	0	0	0	0	0	0	0	0	0	0	0	0	0	2.68123	0
ADPRH	ADP-ribosylhydrolase ARH1	0	0	0	0	1.08715	0	0	0	0	0	0	0	0	0	0	1.84474	0
ADPRHL1	Inactive ADP-ribosyltransferase ARH2	48.6772	69.6997	21.8381	64.6493	20.3793	19.3142	29.4771	35.6604	8.66276	43.9316	47.1184	49.7373	43.2867	38.0739	10.8674	39.8598	50.9951
ADPRHL1	Isoform of Q8NDY3, Inactive ADP-ribosyltransferase ARH2;Isoform of Q8NDY3, Inactive ADP-ribosyltransferase ARH2	0	0	0	1.71935	0	0.774956	3.31425	1.69428	0	2.7668	0	3.12091	0	0	0	8.6823	0
ADRM1	Proteasomal ubiquitin receptor ADRM1	50.7371	284.597	0	0	0	0	59.8942	58.1816	203.965	104.13	0	241.425	44.6431	99.4094	0	60.0807	0
ADSL	Adenylosuccinate lyase	30.0418	38.1093	25.3113	52.962	18.7365	11.8981	9.01332	14.8281	5.08928	9.18707	13.4459	12.7639	24.8002	9.12068	7.27489	78.4214	13.7413
ADSS1	Adenylosuccinate synthetase isozyme 1	173.47	104.769	106.86	128.636	80.4061	91.4697	90.7788	135.546	88.4008	110.275	157.069	97.7647	111.984	129.696	79.7309	178.006	179.568
AEBP1	Adipocyte enhancer-binding protein 1	44.6607	315.814	52.3498	0	580.215	0	0	0	147.047	192.432	0	0	110.117	56.6275	0	177.965	171.486
AFDN	Afadin;Isoform of P55196, Isoform 5 of Afadin	0	8.1345	0	0	4.80053	0	0	0	0	0	0	0	6.10316	0	0	8.05814	5.95152
AFF1	AF4/FMR2 family member 1;Isoform of P51825, Isoform 2 of AF4/FMR2 family member 1;Isoform of P51825, Isoform 3 of AF4/FMR2 family member 1	0	0	0	0	0	0	0	0	0	0	0	0	0	0	0	5.63813	0
AFG1L	AFG1-like ATPase	0	0	0	14.0982	0	0	0	0	0	5.00008	0	0	0	0	0	0	0
AFG3L2	AFG3-like protein 2	403.204	24.7418	88.6777	160.977	23.136	26.6304	75.1942	142.065	22.4056	115.872	143.943	56.4523	22.6649	143.723	28.8089	33.5687	29.5004
AFM	Afamin	0	0	0	0	0	0	2.79695	0	0	0	4.6269	0	0	0	0	0	0
AFP	Alpha-fetoprotein	0	31.0764	28.439	31.0764	25.5264	14.331	30.8166	32.3509	30.4969	17.5621	0	20.03	27.6474	0	13.9871	31.8006	26.9916
AGK	Acylglycerol kinase, mitochondrial	89.6448	6.20913	11.6712	27.0062	7.80708	0	11.9202	15.863	4.34066	9.85547	17.664	6.94835	7.65164	13.413	5.54149	9.43702	6.74572
AGL	Glycogen debranching enzyme	1637.67	987.031	1762.04	1716.19	1217.84	1203.03	1583.38	1316.09	1097.13	1658.35	1121.22	1661.81	1905.7	2350.86	1175.24	1131.71	930.74
AGMAT	Agmatinase, mitochondrial	0	9.63232	20.4981	11.9197	5.49147	17.6473	8.6953	15.8849	8.81163	4.72038	0	6.93237	39.9167	21.4895	8.2666	12.9938	19.5582
AGO1	Protein argonaute-1	0	2.52134	2.52134	2.52134	0	49.3944	0	0	0	0	0	0	0	0	41.1649	0	0
AGO2	Protein argonaute-2	15.3435	13.5747	8.43557	8.94879	10.076	9.42925	8.54643	11.4363	6.54419	11.646	14.7533	8.7656	10.9636	14.0614	8.74031	60.3997	13.735
AGPAT1	1-acyl-sn-glycerol-3-phosphate acyltransferase alpha	0	8.85382	6.8488	9.21858	4.10194	5.01276	0	33.196	2.30333	14.2849	0	17.0837	6.33074	40.6843	4.04414	32.5188	5.27993
AGPAT2	1-acyl-sn-glycerol-3-phosphate acyltransferase beta	0	0	0	12.03	0	0	7.40943	15.3633	0	9.80567	0	5.80339	0	11.9434	0	0	0
AGPAT3	1-acyl-sn-glycerol-3-phosphate acyltransferase gamma	103.068	8.78883	34.4679	27.4198	10.5655	3.9082	16.6374	44.3288	9.93702	30.731	35.999	14.9859	8.38213	32.0795	6.5785	11.2056	13.3207
AGPAT5	1-acyl-sn-glycerol-3-phosphate acyltransferase epsilon	7.6617	0	5.3705	10.2086	1.25542	0	10.0643	3.51954	0	0	8.23171	9.80352	0	9.35249	14.5086	0	28.1014
AGPS	Alkyldihydroxyacetonephosphate synthase, peroxisomal	5.651	3.58617	6.24043	3.58617	1.9019	3.92896	0	9.5145	3.80677	11.638	229.768	7.84841	2.55126	8.41448	4.00707	10.0516	5.54279
AGRN	Isoform of O00468, Isoform 6 of Agrin;Isoform of O00468, Isoform 7 of Agrin	0	10.7234	10.7234	10.7234	0	12.8907	0	21.5073	0	0	0	38.7777	5.74585	57.2173	0	14.8708	8.50801
AGT	Angiotensinogen	0	0	0	4.88837	2.51182	2.36743	2.11293	0	0	8.69315	8.91436	0	1.56911	9.20507	0	0	0
AHCTF1	Protein ELYS;Isoform of Q8WYP5, Isoform 2 of Protein ELYS;Isoform of Q8WYP5, Isoform 3 of Protein ELYS	0	0	0	0	0.645786	0	0	0	0	2.47843	0	0	0	0	0	0	0.717015
AHCY	Adenosylhomocysteinase	15.2695	31.3062	10.309	12.2001	7.15466	3.69894	0	0	5.48601	0	0	7.17269	11.8047	0	3.39099	7.3508	15.6613
AHCYL1	S-adenosylhomocysteine hydrolase-like protein 1	15.8134	10.1843	8.80065	0	4.83046	5.81135	0	0	0	8.07193	0	8.45049	4.46637	13.4161	5.54404	8.25914	8.54729
AHCYL2	Isoform of Q96HN2, Isoform 2 of Adenosylhomocysteinase 3	37.4995	35.0777	33.4052	43.5175	15.6095	14.0468	38.6531	20.6104	7.67638	21.6859	23.7132	25.397	18.2203	24.419	12.23	23.7648	25.2713
AHNAK	Neuroblast differentiation-associated protein AHNAK	138.524	137.858	127.472	79.848	31.426	72.6737	115.98	131.7	35.1849	53.9979	158.851	100.991	43.1871	94.7823	73.948	155.609	113.326
AHSA1	Activator of 90 kDa heat shock protein ATPase homolog 1	0	7.94019	0	0	0	9.51212	0	0	0	0	0	0	8.22157	0	0	3.94398	4.34238
AHSG	Alpha-2-HS-glycoprotein	0	0	0	66.4759	0	0	592.086	0	0	0	2058.21	0	0	0	0	0	8.93981
AIDA	Axin interactor, dorsalization-associated protein	0	0	0	0	0	0	0	0	0	0	0	0	1.02507	0	0	1.56183	0
AIFM1	Apoptosis-inducing factor 1, mitochondrial	73.4726	51.278	51.3351	96.1311	28.3132	32.0906	47.3352	86.295	22.6181	63.7496	91.157	44.6459	27.641	63.2452	30.1111	49.5718	44.1701
AIG1	Androgen-induced gene 1 protein;Isoform of Q9NVV5, Isoform 2 of Androgen-induced gene 1 protein	0	0	0	0	0	0	0	6.05739	0	14.7597	0	0	0	0	0	0	0
AIMP1	Aminoacyl tRNA synthase complex-interacting multifunctional protein 1;Isoform of Q12904, Isoform 2 of Aminoacyl tRNA synthase complex-interacting multifunctional protein 1	28.4856	18.2319	45.7104	29.3876	10.71	7.746	16.4393	14.1999	4.24479	9.87819	0	9.86693	8.56751	12.3773	9.97991	13.3148	10.9076
AIMP2	Aminoacyl tRNA synthase complex-interacting multifunctional protein 2	15.7916	12.8065	15.9373	18.7182	8.02581	6.42654	7.48488	13.6926	4.9165	9.50336	0	10.7098	7.46714	9.09551	8.8987	8.88249	9.37623
AIP	AH receptor-interacting protein	0	0	0	0	0	0	0	0	0	0	0	0	3.79013	0	0	0	0
AK1	Adenylate kinase isoenzyme 1	299.106	271.163	241.777	449.95	127.2	100.41	226.613	387.156	69.5434	125.799	286.873	179.921	210.307	273.103	60.3708	122.782	187.296
AK2	Adenylate kinase 2, mitochondrial	0	0	0	51.8877	18.7451	27.6298	0	0	0	4.94285	0	0	20.6659	17.0227	27.5313	8.87431	0
AK3	GTP:AMP phosphotransferase AK3, mitochondrial	19.9125	18.4983	0	21.6952	0	0	0	58.3292	0	0	0	5.35651	10.7784	0	0	0	0
AK4	Adenylate kinase 4, mitochondrial	0	0	0	0	0	0	0	0	0	0	0	0	0	0	0	1.08152	0
AKAP1	A-kinase anchor protein 1, mitochondrial	170.108	17.2159	26.2189	59.6986	11.094	8.02005	34.5847	77.8907	17.067	39.2353	42.2562	14.6447	4.55255	46.2091	17.5278	18.925	0
AKAP12	A-kinase anchor protein 12	36.0351	18.0814	29.0814	27.0872	16.5344	4.95653	18.2509	31.9511	11.6374	24.7729	25.415	17.619	13.9301	25.0915	23.0583	21.7288	21.7484
AKAP13	A-kinase anchor protein 13;Isoform of Q12802, Isoform 2 of A-kinase anchor protein 13;Isoform of Q12802, Isoform 3 of A-kinase anchor protein 13	0	0	5.20852	7.94263	0	0	5.62451	5.75024	0	5.85163	9.40351	3.42044	0	6.76904	0	0	0
AKAP8L	A-kinase anchor protein 8-like	0	0	0	0	0	0	0	0	0	0	0	4.62042	0	0	0	0	0
AKNAD1	Protein AKNAD1	8.83742	0	5.82793	4.49225	0.581552	0.624708	11.6435	13.2949	1.00082	8.46013	12.6006	6.46073	1.10016	15.5034	0	4.36149	0
AKR1A1	Aldo-keto reductase family 1 member A1	0	6.61502	0	0	2.35011	0.993979	0	0	0.963954	6.52044	5.19864	3.26198	6.39521	2.77925	0.486325	4.17095	3.7751
AKR1B1	Aldo-keto reductase family 1 member B1	0	3.95031	0	0	6.0714	0	0	0	2.67089	0	32.1063	0	4.89728	0	0	5.57487	0
AKR1C1	Aldo-keto reductase family 1 member C1	2.4195	10.5689	3.69245	4.40823	4.352	3.29517	2.44729	12.3933	4.02955	6.26725	6.62659	11.1682	4.20779	10.8075	2.22242	19.1485	7.14049
AKR1C3	Aldo-keto reductase family 1 member C3	0	0	0	0	0	0	0	0	0	0	0	0	0	0	0	5.27029	0
AKR7A2	Aflatoxin B1 aldehyde reductase member 2	0	23.4008	7.88524	23.4008	22.6198	4.65455	0	10.3035	8.85026	35.5858	0	0	42.7223	17.9733	4.31844	22.3427	3.78293
AKT1	RAC-alpha serine/threonine-protein kinase	30.7698	0	7.4613	101.336	0	0	0	0	4.60846	48.0814	106.412	0	0	0	16.921	2.50343	9.97076
AKT1S1	Proline-rich AKT1 substrate 1;Isoform of Q96B36, Isoform 3 of Proline-rich AKT1 substrate 1	0	3.70963	0	0	1.66375	0.929774	0	0	0	0	0	0	1.55867	0	0	1.86567	0.624063
AKT2	RAC-beta serine/threonine-protein kinase	12.0372	7.07344	11.9788	11.4199	3.69989	2.73261	7.14471	6.71716	1.92157	7.60461	12.6704	7.20248	5.27296	11.1155	3.51177	8.95643	8.10454
AKTIP	AKT-interacting protein;Isoform of Q9H8T0, Isoform 2 of AKT-interacting protein	9.38265	4.33542	0	0	4.94753	2.98867	0	0	2.40578	0	0	0	4.63932	9.43685	0	3.98047	0
ALAD	Delta-aminolevulinic acid dehydratase	0	0	0	0	0	0	0	0	0	0	0	0	2.59869	0	0	0	0
ALB	Albumin	87.3827	46.7445	154.744	168.254	249.396	32.0241	155.269	202.808	226.964	196.326	478.399	70.1911	171.299	123.261	120.428	185.582	341.53
ALDH16A1	Aldehyde dehydrogenase family 16 member A1	0	25.8423	46.6245	0	12.4391	6.91795	0	0	19.7404	806.821	0	8.73739	13.6696	12.1179	9.38916	26.8927	18.9465
ALDH1B1	Aldehyde dehydrogenase X, mitochondrial	12.9517	23.2665	18.6472	14.6779	7.03864	4.29316	0	0	0	0	0	12.3561	8.81971	0	0	17.137	10.4455
ALDH1L1	Cytosolic 10-formyltetrahydrofolate dehydrogenase	17.5884	32.6762	16.6003	18.8046	7.88658	8.73529	4.62152	14.3445	4.0809	5.60244	25.3916	6.96437	13.1964	17.829	5.01449	6.84912	5.42161
ALDH1L2	Mitochondrial 10-formyltetrahydrofolate dehydrogenase	0	7.111	0	0	0	0	0	0	0	0	0	0	4.83119	0	0	0	0
ALDH2	Aldehyde dehydrogenase, mitochondrial	31.6246	56.1993	42.965	27.4135	14.6315	10.0781	6.42369	12.1699	3.48703	21.202	5.64664	19.8236	18.8519	16.3052	5.97347	37.1308	21.0974
ALDH3A2	Aldehyde dehydrogenase family 3 member A2;Isoform of P51648, Isoform 2 of Aldehyde dehydrogenase family 3 member A2	71.8994	52.1952	61.1948	61.8962	22.3454	15.7571	36.575	45.8021	13.5599	26.6365	38.6803	39.1545	13.2237	37.7509	19.5761	47.7568	32.1461
ALDH4A1	Delta-1-pyrroline-5-carboxylate dehydrogenase, mitochondrial	21.7233	34.4374	18.4083	35.8644	17.6518	10.8762	9.32362	15.0448	5.48474	19.6416	13.1006	10.9039	35.4858	12.1991	9.85886	58.3626	25.3588
ALDH5A1	Succinate-semialdehyde dehydrogenase, mitochondrial;Isoform of P51649, Isoform 2 of Succinate-semialdehyde dehydrogenase, mitochondrial	80.0434	150.741	83.3134	45.9583	163.64	80.2375	27.3014	64.5039	38.6506	54.5729	38.6625	47.839	140.622	34.7078	63.3471	129.222	63.8158
ALDH6A1	Methylmalonate-semialdehyde dehydrogenase [acylating], mitochondrial;Isoform of Q02252, Isoform 2 of Methylmalonate-semialdehyde dehydrogenase [acylating], mitochondrial	15.3012	17.0856	13.9867	20.0062	9.48831	13.6357	13.1034	18.4156	9.16761	30.2118	44.0342	12.0665	19.5009	16.8938	12.4689	62.9122	19.7892
ALDH7A1	Isoform of P49419, Isoform 2 of Alpha-aminoadipic semialdehyde dehydrogenase	170.972	50.7611	16.2336	10.4247	16.9546	5.96317	0	0	7.5728	11.2429	0	12.554	24.8402	0	9.90437	26.6584	17.8866
ALDH9A1	4-trimethylaminobutyraldehyde dehydrogenase	67.3326	16.2566	6.86143	95.0089	11.4127	15.5231	11.3028	11.2586	7.79572	8.01082	24.232	14.1606	21.1619	0	11.9049	17.3714	16.6084
ALDOA	Fructose-bisphosphate aldolase A	42.7883	33.2607	33.3976	97.1324	38.0793	38.2805	62.4144	90.0712	64.7524	108.063	140.731	79.3929	60.8211	95.154	26.6948	205.89	24.6734
ALDOC	Fructose-bisphosphate aldolase C	0	9.48049	5.95682	0	8.1038	7.81947	0	2.07103	0	0	0	0	8.65874	0	8.55316	21.4701	12.6569
ALG1	Chitobiosyldiphosphodolichol beta-mannosyltransferase	0	0	0	0	0	0	0	0	0	0	0	0	0	0.314505	0	0	0
ALG11	GDP-Man:Man(3)GlcNAc(2)-PP-Dol alpha-1,2-mannosyltransferase	16.9522	6.15788	0	13.0366	4.32403	2.09545	0	0	1.88693	10.1526	0	4.08208	4.93918	17.5601	1.24287	6.39197	5.34353
ALG12	Dol-P-Man:Man(7)GlcNAc(2)-PP-Dol alpha-1,6-mannosyltransferase	0	0	0	6.49029	0	0	0	0	0	0	7.27428	0	0	0	0	0	0
ALG2	Alpha-1,3/1,6-mannosyltransferase ALG2	0	1.662	0	0	0	0	0	0	0	0	0	0	0	0	0	0	0
ALG5	Dolichyl-phosphate beta-glucosyltransferase	0	11.4112	11.8717	19.7726	8.61765	0	5.94134	13.3072	4.06964	17.5662	18.1673	5.35158	4.7693	9.66556	4.7449	30.0978	7.37273
ALG9	Alpha-1,2-mannosyltransferase ALG9;Isoform of Q9H6U8, Isoform 3 of Alpha-1,2-mannosyltransferase ALG9	15.8426	0	9.09316	8.52244	0	0	7.07432	12.212	0	8.80597	12.826	6.90052	0	7.94378	0	0	0
ALKBH4	Alpha-ketoglutarate-dependent dioxygenase alkB homolog 4	0	0	0	0	0	0	8.10186	0	0	0	0	0	0	0	0	0	0
ALKBH5	RNA demethylase ALKBH5;Isoform of Q6P6C2, Isoform 1 of RNA demethylase ALKBH5	4.14405	9.33751	0	0	0	11.5446	0	0	0	0	0	0	0	0	4.2897	0	6.03015
ALOX5AP	Arachidonate 5-lipoxygenase-activating protein	0	0	0	0	0	0	4.8583	0	0	0	0	1.90187	0	0	0	0	0
ALPK3	Alpha-protein kinase 3	43.3636	30.2922	27.8173	46.6191	15.7793	15.5231	39.0018	31.0303	12.2365	19.8051	32.8012	18.1085	11.0396	30.5934	15.6073	121.014	11.7795
ALS2	Alsin	0	1.04938	0	0	0	0	0	0	0	0	0	0	0	4.68951	0	0	0
ALYREF	THO complex subunit 4	22.0508	17.0228	28.0488	18.8393	19.6557	33.1954	21.2953	25.5556	25.5656	48.1812	46.7617	18.2718	17.8014	48.3868	25.2364	34.8205	11.9269
AMBP	Protein AMBP	58.1333	19.2633	101.348	88.321	0	25.2045	165.457	140.471	26.1551	129.353	320.251	70.5151	31.0996	102.171	5.42784	17.8581	0
AMPD1	AMP deaminase 1	1391.96	851.983	1493.88	449.95	655.222	281.175	944.245	431.505	373.815	317.378	1549.85	383.691	495.855	393.756	475.474	173.075	605.38
AMPD2	AMP deaminase 2;Isoform of Q01433, Isoform Ex1A-2-3 of AMP deaminase 2	0	0	0	0	0	0	0	0	0	0	0	0	0	0	0	2.36339	0
AMPD3	AMP deaminase 3;Isoform of Q01432, Isoform 2 of AMP deaminase 3;Isoform of Q01432, Isoform 3 of AMP deaminase 3	7.20652	12.5236	2.60324	0	2.0431	7.09868	0	0	1.1289	10.5191	11.7812	21.4132	0	0	3.30618	39.7681	10.8525
AMZ2	Archaemetzincin-2	10.2784	9.85215	13.4034	8.95497	29.4231	52.9148	25.3387	31.1807	19.1539	87.373	22.8502	31.2667	46.8441	19.5581	44.9807	15.9234	29.1091
ANGPTL2	Angiopoietin-related protein 2	0	0	0	0	0	0	5.04527	0	0	3.58325	0	0	4.74957	0	0	6.72411	1.10542
ANK1	Isoform of P16157, Isoform 22 of Ankyrin-1;Isoform of P16157, Isoform 23 of Ankyrin-1	220.864	12.3604	25.3521	77.3151	10.7273	4.78826	38.0789	49.4864	6.34974	30.2049	79.8528	10.7469	11.5466	55.313	6.9267	10.1586	11.642
ANK1	Isoform of P16157, Isoform Er5 of Ankyrin-1	89.7688	37.7425	17.2749	167.095	9.50143	8.69916	47.1286	115.927	8.95893	22.687	102.303	33.3259	9.49412	26.7441	14.2307	17.8416	8.40869
ANK2	Isoform of Q01484, Isoform 4 of Ankyrin-2	34.4529	36.3188	14.5116	45.0053	19.8376	16.5416	26.8031	57.4098	15.2215	29.7151	70.4353	15.4911	22.2564	50.4112	9.8634	24.6227	34.636
ANK2;ANK2;ANK2	Isoform of Q01484, Ankyrin-2;Isoform of Q01484, Ankyrin-2;Isoform of Q01484, Ankyrin-2	0	2.5034	9.94752	3.23865	1.31913	0	8.95745	10.5995	0	5.67907	7.44887	6.62646	2.05236	13.7318	1.30445	2.82836	1.53932
ANK3	Ankyrin-3	41.2596	45.0123	34.4124	23.6899	11.5157	15.3772	20.8826	29.7431	10.4558	10.7294	25.0144	31.8994	10.298	22.3835	24.2174	53.757	54.9703
ANKFY1	Rabankyrin-5;Isoform of Q9P2R3, Isoform 4 of Rabankyrin-5	0	0	0	0	0	0	0	0	0	43.8508	0	0	149.505	0	0	0	0
ANKHD1	Isoform of Q8IWZ3, Isoform 6 of Ankyrin repeat and KH domain-containing protein 1	0	0	0	0	0	0	0	0	0	4.11223	0	0	0	0	0	4.19406	0
ANKRD1	Ankyrin repeat domain-containing protein 1	0	0	0	0	0	0	2.15072	0	0	0	0	26.3926	0	0	0	66.9476	1.53684
ANKRD10	Ankyrin repeat domain-containing protein 10	37.5946	0	0	0	0	0	0	0	0	0	0	0	0	37.7161	0	0	0
ANKRD2	Ankyrin repeat domain-containing protein 2	19.7936	61.92	15.375	27.7884	27.8477	24.9217	7.39239	25.263	8.25574	40.4648	19.337	10.5604	65.7135	19.5536	13.6718	38.9166	11.8366
ANKRD28	Serine/threonine-protein phosphatase 6 regulatory ankyrin repeat subunit A	0	5.58896	89.5601	7.64125	0	15.7898	0	11.2794	0	0	0	0	0	0	1.12675	0	4.87672
ANKRD35	Ankyrin repeat domain-containing protein 35	0	0	0	0	2.23249	0	5.95915	0	0	0	0	0	0	0	0	0	0
ANKRD44	Serine/threonine-protein phosphatase 6 regulatory ankyrin repeat subunit B	0	0.707182	0.707182	0.707182	0	0	0	0	0	0	13.4893	2.74968	0	10.9101	0	0	0
ANKS1A	Ankyrin repeat and SAM domain-containing protein 1A	17.5479	3.10621	0	15.6194	12.9565	10.6605	20.0486	0	12.7807	34.7998	22.4538	13.1517	9.52696	24.7473	0	0	0
ANKZF1	Ankyrin repeat and zinc finger domain-containing protein 1	189.988	22.6481	75.1648	263.005	17.5303	20.8726	220.843	109.166	23.5048	76.2917	337.435	104.853	16.0308	167.428	9.39781	55.3522	10.0422
ANO10	Anoctamin-10	9.5066	0	17.5031	16.6328	0	0	10.4516	6.59152	0	0	16.5269	0	0	0	0	0	0
ANO6	Anoctamin-6;Isoform of Q4KMQ2, Isoform 2 of Anoctamin-6;Isoform of Q4KMQ2, Isoform 3 of Anoctamin-6	0	5.04349	0	5.46216	4.02799	3.72201	3.43942	8.48762	0	0	0	2.95789	0	0	0	12.4605	5.40043
ANOS1	Anosmin-1	54.4911	50.2726	42.4536	24.6924	24.9798	51.9729	36.34	29.6473	20.1074	11.5738	19.2571	68.8941	12.3667	17.9237	33.5372	12.9878	24.5374
ANP32A	Acidic leucine-rich nuclear phosphoprotein 32 family member A	111.744	10.7481	10.7481	10.7481	5.34304	6.24277	0	0	4.70063	0	0	5.37009	10.2413	0	4.01168	15.468	14.11
ANP32E	Acidic leucine-rich nuclear phosphoprotein 32 family member E	0	225.181	0	0	0	0	256.735	0	0	393.077	477.408	0	0	0	0	0	0
ANXA1	Annexin A1	0	6.32603	0	0	7.03378	0	0	7.46081	5.11042	5.3787	0	2.21861	9.32297	14.8398	0	37.3882	6.97796
ANXA11	Annexin A11;Isoform of P50995, Isoform 2 of Annexin A11	39.8314	26.8677	22.994	33.8115	22.6876	19.2166	32.1503	52.9524	18.4525	55.0525	36.3739	27.1445	39.2152	49.3659	21.7684	52.7151	15.0497
ANXA2	Isoform of P07355, Isoform 2 of Annexin A2	0	8.25907	11.3531	2.85472	15.3175	12.7402	15.0101	11.8983	16.5637	7.4093	23.5662	23.1357	24.9836	15.8901	7.41356	52.4487	12.0124
ANXA3	Annexin A3	164.826	3.63941	34.3411	17.9376	2.78862	2.71505	25.5673	25.0834	3.86862	14.8894	11.0202	22.7657	2.76665	27.4807	0	3.2295	0
ANXA4	Annexin A4;Isoform of P09525, Isoform 3 of Annexin A4	0	2.59735	2.59735	4.62875	2.73709	0	0	0	2.71179	3.67771	0	0	3.43997	18.1856	0	22.539	0
ANXA6	Annexin A6	34.3104	64.9428	80.6705	191.454	198.559	76.1688	16.9155	76.769	84.2279	95.0555	76.0659	47.3786	281.874	205.934	39.285	295.417	34.5325
ANXA6	Isoform of P08133, Annexin	3.26231	0	0	0	0	0	0	0	0	0	0	0	0	0	0	0.782951	0
ANXA7	Annexin A7;Isoform of P20073, Isoform 2 of Annexin A7	0	10.8027	11.2931	15.1518	4.66432	4.51105	0	13.7843	2.66598	4.14455	10.1132	1.71389	6.95912	7.77906	9.75948	9.88405	10.7258
AOC3	Membrane primary amine oxidase	10.4478	13.2169	0	0	5.29284	12.9145	0	0	6.42623	4.94512	0	3.06819	7.64636	5.95288	131.409	13.1685	20.6314
AP1B1	AP-1 complex subunit beta-1;Isoform of Q10567, Isoform B of AP-1 complex subunit beta-1	62.1764	9.15653	5.52605	7.76541	4.04659	7.25901	0	0	0	0	0	6.87515	6.83525	429.761	7.79878	8.36055	11.1848
AP1G1	AP-1 complex subunit gamma-1;Isoform of O43747, Isoform 2 of AP-1 complex subunit gamma-1	3.21089	3.61103	15.0735	32.8522	0	9.88501	0	0	0	0	0	16.9505	45.7567	0	0	0	2.09425
AP1M1	AP-1 complex subunit mu-1	9.77744	11.4718	8.1661	15.1135	3.27182	13.01	0	0	0	5.50779	0	7.01103	5.40449	0	3.1407	6.74116	7.65646
AP1S2	AP-1 complex subunit sigma-2	0	2.84074	0	19.8319	0	0	0	26.8649	0	0	0	0	0	0	0	3.48927	0
AP2A1	AP-2 complex subunit alpha-1;Isoform of O95782, Isoform B of AP-2 complex subunit alpha-1	21.0972	12.4518	11.0998	0	4.91687	3.57336	8.76364	14.655	5.29366	12.8611	6.65871	16.1652	4.99292	13.7413	5.81737	9.91368	8.32201
AP2A2	Isoform of O94973, Isoform 2 of AP-2 complex subunit alpha-2	0	3.09194	0	0	1.831	3.5284	0	0	0	0	0	0	2.30704	0	0	4.57335	5.3423
AP2B1	AP-2 complex subunit beta;Isoform of P63010, Isoform 2 of AP-2 complex subunit beta	7.73438	5.52625	0	134.668	3.43866	5.17937	4.2353	0	3.5266	7.16931	0	5.4448	3.82256	8.61841	3.78466	5.90792	7.51499
AP2M1	AP-2 complex subunit mu;Isoform of Q96CW1, Isoform 2 of AP-2 complex subunit mu	189.769	175.401	257.522	156.518	80.61	111.27	104.782	156.058	79.2786	216.51	97.6765	198.555	108.831	196.213	102.879	195.045	179.155
AP2S1	AP-2 complex subunit sigma	0	14.4421	8.41036	74.6387	8.63751	67.9637	0	0	5.86214	3.57666	0	7.02558	8.41501	4.4867	20.9183	14.1623	14.0387
AP3B1	AP-3 complex subunit beta-1;Isoform of O00203, Isoform 2 of AP-3 complex subunit beta-1	2.2173	6.53027	6.53027	6.53027	0	0	0	0	0	0	0	0	1.94024	0	0	16.5667	3.72244
AP3D1	AP-3 complex subunit delta-1;Isoform of O14617, Isoform 5 of AP-3 complex subunit delta-1	12.9457	13.9197	23.5893	23.9422	24.4449	16.9698	14.3577	65.7485	8.72481	12.2483	65.4621	13.6233	22.1847	12.2667	15.0601	50.6448	10.9428
AP3M1	AP-3 complex subunit mu-1	0	104.479	124.227	103.434	136.643	80.1083	72.8928	116.704	188.954	95.7364	148.214	78.0696	87.893	133.054	76.582	143.461	77.8266
AP4E1	AP-4 complex subunit epsilon-1	0	0	0	0	0	67.2477	0	56.6482	0	106.826	54.3739	0	0	0	70.6361	0	66.6697
AP4M1	AP-4 complex subunit mu-1	0	0	8.30452	12.9111	0	0	0	9.99507	0	0	0	8.97391	0	13.1591	0	0	0
AP5M1	AP-5 complex subunit mu-1	0	0	6.63307	0	0	0	0	0	0	0	0	0	0	0	0	0	0
AP5Z1	AP-5 complex subunit zeta-1	0	0	0	0	0	0	0	0	0	0	28.9195	0	0	0	0	0	0
APAF1	Apoptotic protease-activating factor 1;Isoform of O14727, Isoform 4 of Apoptotic protease-activating factor 1	0	0	0	0	5.57685	0	0	0	0	19.1945	0	0	0	0	0	0	0
APC2	Adenomatous polyposis coli protein 2	27.7093	6.92996	15.7621	27.7629	4.49561	4.09145	0	0	0	5.28296	15.1841	0	0	0	1.64485	2.11609	0
APCS	Serum amyloid P-component	29.9106	15.2486	0	0	9.97674	23.0291	60.3649	92.8722	17.0356	75.2449	112.019	57.2508	18.735	60.9154	8.45136	25.0343	12.5322
APEH	Acylamino-acid-releasing enzyme	78.9815	116.126	122.72	81.4449	41.2372	36.794	32.9674	48.9199	14.3105	42.4988	58.599	53.074	51.7314	40.6188	26.0631	27.1353	33.2145
APEX1	DNA-(apurinic or apyrimidinic site) endonuclease	62.9543	38.1181	19.5306	12.2086	32.1876	23.7891	8.01096	17.0563	27.012	13.7207	12.4305	11.0048	32.2147	21.3564	42.0172	52.3642	51.4314
API5	Isoform of Q9BZZ5, Isoform 2 of Apoptosis inhibitor 5	0	2.87959	0	0	2.32161	0	0	0	2.52555	2.37891	0	0	4.21749	0	3.53368	5.98873	1.94191
APMAP	Adipocyte plasma membrane-associated protein	0	0	0	0	2.54032	0	0	0	0	0	0	0	0	0	0	12.472	0
APOA1	Apolipoprotein A-I	39.1945	31.5015	14.6189	53.2432	24.0153	12.6176	58.8958	24.2653	31.1069	19.9746	173.976	43.0707	13.8215	7.65645	47.0898	48.8917	41.6992
APOA2	Apolipoprotein A-II	22.9206	24.8445	10.1675	23.0125	26.6249	7.4951	9.84429	28.4044	15.5653	43.7298	35.1714	50.1282	18.7178	9.68785	23.8356	32.8197	47.9433
APOA4	Apolipoprotein A-IV	0	2.98972	132.347	0	2.3916	0	2.50717	6.68322	2.49664	4.12361	0	2.4631	1.66899	38.1704	1.0706	5.46179	4.30852
APOB	Apolipoprotein B-100	54.4534	18.3794	197.886	79.3897	11.4206	39.5164	57.2117	27.5604	9.67289	8.84458	38.4937	13.2551	4.16922	44.4148	20.1942	13.7922	7.49943
APOBEC2	C->U-editing enzyme APOBEC-2	1462.6	554.921	606.059	1575.3	694.207	529.758	638.241	874.754	644.401	576.338	752.645	485.939	526.568	649.572	564.842	622.493	628.099
APOBR	Apolipoprotein B receptor;Isoform of Q0VD83, Isoform 3 of Apolipoprotein B receptor	55.9661	0	9.14355	13.279	1.7918	2.42369	10.7742	0	0	0	25.3975	7.89372	0	7.39822	2.62378	0	0
APOC2	Apolipoprotein C-II	0	0	0	0	0	0	39.6629	0	0	50.9773	212.32	131.578	0	0	0	0	0
APOC3	Apolipoprotein C-III	13.2931	6.35815	9.69203	11.5522	7.17941	6.55658	8.16177	9.90799	3.29728	8.64126	11.0941	10.9795	3.50957	0	4.24939	5.8686	10.8076
APOD	Apolipoprotein D	0	7.37617	7.58603	0	10.4903	3.04143	0	0	4.90068	4.91221	0	3.7058	22.8168	1.53754	4.63049	27.5318	8.51193
APOE	Apolipoprotein E	13.0745	15.6362	5.78915	15.6734	8.70741	12.2936	0	0	4.83455	5.55363	20.5017	12.3277	4.65645	0	9.46295	8.64838	11.1411
APOH	Beta-2-glycoprotein 1	0	0	0	68.3068	3.4268	0	59.3587	66.4639	7.8065	32.0536	177.292	22.0944	11.683	77.4154	9.23478	16.9838	0
APOL2	Apolipoprotein L2	3.25406	7.09628	0	0	0	0	0	0	0	6.26581	0	0	8.51833	0	0	0	9.77076
APOO	MICOS complex subunit MIC26	1183.38	46.0926	85.254	145.601	22.4124	25.1407	28.0533	99.2169	17.2845	140.145	54.5997	43.1501	15.3093	73.5068	28.3026	33.2227	32.5483
APOOL	MICOS complex subunit MIC27	172.514	51.0894	111.742	190.662	32.7106	34.8239	136.296	237.293	24.8345	128.848	257.508	83.7494	32.3783	192.144	35.6966	49.1286	42.4354
APPL1	DCC-interacting protein 13-alpha	0	3.21167	0	5.32187	2.62596	0	0	0	0	0	0	0	0	80.6728	0	0	0
APRT	Adenine phosphoribosyltransferase	0	0	0	0	0	0	0	0	0	0	378.521	0	0	0	0	0	0
AQP1	Aquaporin-1	0	0	38.9417	43.1086	0	0	24.501	43.1704	0	21.0706	80.6288	33.2646	0	34.3817	0	0	0
AQP4	Aquaporin-4;Isoform of P55087, Isoform 1 of Aquaporin-4	0	72.0827	49.285	259.038	0	116.809	73.5503	38.7245	0	31.6211	0	48.5268	0	41.6992	108.399	71.6696	0
AQP7B;AQP7P3;AQP7	Aquaporin-7B;Putative aquaporin-7-like protein 3;Aquaporin-7	0	0	0	0	0	0	0	0	0	0	0	0	2.31182	0	0	0	0
AR	Androgen receptor	9.5725	0	0	0	0	0	13.9182	0	0	0	18.5349	0	0	10.0723	0	3.61439	0
ARAF	Serine/threonine-protein kinase A-Raf	0	0	0	4.71698	0	0	2.69392	0	0	0	0	0	4.68225	0	0	0	0
ARAP1	Arf-GAP with Rho-GAP domain, ANK repeat and PH domain-containing protein 1;Isoform of Q96P48, Isoform 3 of Arf-GAP with Rho-GAP domain, ANK repeat and PH domain-containing protein 1	0	0	0	0	0	0	0	0	0	0	0	0	4.07619	0	0	0	0
ARAP3	Arf-GAP with Rho-GAP domain, ANK repeat and PH domain-containing protein 3	44.2105	27.6523	38.4605	62.7573	0	0	56.9882	0	0	26.0302	50.4185	24.648	0	59.7898	29.9521	0	0
ARCN1	Coatomer subunit delta	15.14	20.2363	6.15198	20.5999	3.65754	7.02388	0	22.4588	0	8.93259	0	8.90393	6.09894	35.3449	3.725	9.63241	9.60126
ARF3;ARF1	ADP-ribosylation factor 3;ADP-ribosylation factor 1	0	12.0014	7.12877	0	4.75542	0	0	0	3.43919	4.02325	0	7.74965	20.7326	0	8.98725	12.9549	8.90899
ARF4	ADP-ribosylation factor 4	0	52.7875	310.681	0	12.1224	9.42925	0	17.0446	8.617	58.6242	0	0	51.9224	0	11.4006	28.7167	23.4979
ARF5	ADP-ribosylation factor 5	0	0	0	8.98388	0	0	0	0	0	0	0	0	10.1264	0	0	0	0
ARF6	ADP-ribosylation factor 6	8.63625	9.93187	39.5653	0	32.2841	0	19.3814	0	0	8.77359	0	7.38043	13.3676	0	31.6174	4.00345	13.8812
ARFGAP2	ADP-ribosylation factor GTPase-activating protein 2	0	0	0	0	0	0	7.91015	0	0	0	11.9451	1.94259	0	0	0	0	0
ARFGEF2	Brefeldin A-inhibited guanine nucleotide-exchange protein 2	0	92.7323	103.852	113.57	0	0	51.6755	0	0	0	110.533	0	44.3869	0	0	0	0
ARFIP1	Arfaptin-1	12.7857	0	0	0	0	0	0	0	0	0	0	0	0	0	1.45655	30.8699	0
ARGLU1	Arginine and glutamate-rich protein 1	9.92488	14.7276	12.6013	12.6013	20.8972	15.5123	3.75738	0	19.6135	29.1325	0	11.6461	23.9527	13.3853	17.6981	24.2345	15.6757
ARHGAP1	Rho GTPase-activating protein 1	0	28.2248	20.1333	0	18.9186	0	0	0	0	0	0	0	16.2875	0	0	23.7922	0
ARHGAP10	Rho GTPase-activating protein 10	0	0	0	0	0	0	0	0	0	0	0	0	2.39969	15.5821	0	0	0
ARHGAP17	Isoform of Q68EM7, Isoform 5 of Rho GTPase-activating protein 17	23.4545	11.6367	18.7419	64.4858	0.651012	0.590442	0	0	3.8173	12.5683	0	12.6556	0.963063	0	8.20024	12.9818	15.8354
ARHGAP18	Rho GTPase-activating protein 18	0	4151.75	3446.79	0	2159.68	0	0	0	2325.18	2448.37	0	0	2220.52	2958.88	0	3227.27	4094.76
ARHGAP35	Rho GTPase-activating protein 35	188.723	84.068	146.56	124.298	40.3821	47.7944	91.9781	147.838	57.6974	76.0286	128.26	112.068	37.7098	111.796	59.1053	57.8942	92.7744
ARHGAP6	Rho GTPase-activating protein 6	0	0	0	0	0	0	0	0	9.91873	0	0	0	0	0	0	0	0
ARHGDIA	Rho GDP-dissociation inhibitor 1	0	0	0	0	0	0	0	0	0	0	0	0	3.0259	0	1.94638	3.5078	0
ARHGEF1	Rho guanine nucleotide exchange factor 1;Isoform of Q92888, Isoform 3 of Rho guanine nucleotide exchange factor 1	120.677	4.45996	95.6345	0	2.90662	9.79439	0	245.463	3.67245	113	0	0	8.08825	217.384	0.90558	5.86996	2.74365
ARHGEF11	Isoform of O15085, Isoform 2 of Rho guanine nucleotide exchange factor 11	0	3.00076	21.8935	42.0983	4.2334	11.7402	41.8104	43.5999	3.7823	12.4474	39.0113	19.1241	9.7826	21.381	8.15881	9.48276	2.2868
ARHGEF2	Rho guanine nucleotide exchange factor 2;Isoform of Q92974, Isoform 2 of Rho guanine nucleotide exchange factor 2;Isoform of Q92974, Isoform 3 of Rho guanine nucleotide exchange factor	0	0	0	0	0	8.71921	0	0	0	0	0	0	0	0	0	0	0
ARHGEF4	Isoform of Q9NR80, Isoform 4 of Rho guanine nucleotide exchange factor 4	31.1979	0	11.0896	13.8313	0	0	12.7316	15.984	0	8.61147	13.9024	9.4598	0	7.6971	0	0	0
ARHGEF6	Rho guanine nucleotide exchange factor 6	0	0	0	0	0	2.03132	0	0	0	0	0	0	0	0	0	0	0
ARHGEF7	Isoform of Q14155, Isoform 1 of Rho guanine nucleotide exchange factor 7;Isoform of Q14155, Isoform 5 of Rho guanine nucleotide exchange factor 7	0	5.90107	8.3007	10.2793	13.8194	6.32524	2.51238	4.41251	5.44322	4.59068	4.33501	2.73894	8.77717	4.822	4.89245	18.6224	3.73618
ARIH1	E3 ubiquitin-protein ligase ARIH1	21.9445	15.6758	24.4915	34.4877	13.6958	7.99792	0	0	8.7671	18.2212	0	10.8014	13.1873	19.3253	10.4214	14.5189	12.0207
ARIH2	E3 ubiquitin-protein ligase ARIH2	11.7849	4.96628	0	8.04571	9.30869	4.76187	0	0	276.985	16.3598	0	8.94709	13.1842	8.83746	2.71974	9.78892	0
ARK2N	Isoform of Q96B23, Isoform 2 of Uncharacterized protein C18orf25	10.8749	20.213	0	0	6.25877	6.2586	0	4.51217	2.49779	2.71005	0	5.14733	6.91599	0	5.36076	4.98924	9.66336
ARL1	ADP-ribosylation factor-like protein 1;Isoform of P40616, Isoform 2 of ADP-ribosylation factor-like protein 1	0	2.60454	0	14.9164	1.06681	0	0	0	0	0	0	0	2.4091	0	1.0973	0	0
ARL2	ADP-ribosylation factor-like protein 2	0	0	6.1818	0	0	0	0	0	0	0	0	3.07243	0	0	0	0	0
ARL6IP4	ADP-ribosylation factor-like protein 6-interacting protein 4;Isoform of Q66PJ3, Isoform 1 of ADP-ribosylation factor-like protein 6-interacting protein 4	0	1.62604	1.62604	1.62604	0	0	0	0	1.63026	0	0	0	1.32878	0	2.39788	5.85915	0.994325
ARL6IP4	Isoform of Q66PJ3, Isoform 2 of ADP-ribosylation factor-like protein 6-interacting protein 4	18.3961	21.2633	14.812	0	29.4435	19.5469	0	0	13.0304	25.2277	0	7.25073	32.1111	6.1253	15.1784	143.991	12.7066
ARL6IP5	PRA1 family protein 3	169.171	145.758	152.446	254.369	120.085	44.6969	98.9657	147.702	67.3374	89.7382	104.662	73.3131	96.2398	138.62	42.0559	99.3882	91.0392
ARL6IP6	ADP-ribosylation factor-like protein 6-interacting protein 6	0	0	0	0	0	2.41589	0	0	0.719376	8.63331	0	2.55142	4.13385	0	1.25005	0	2.02036
ARL8A	ADP-ribosylation factor-like protein 8A	0	3.88983	0	0	0	0	0	6.50558	0	0	3.61651	0	0	0	0.815317	0	0
ARL8B	ADP-ribosylation factor-like protein 8B	644.949	15.1891	19.307	29.8926	7.30615	7.69445	15.4413	23.2534	5.19106	8.92436	0	12.7404	11.802	23.0902	4.6209	9.62576	9.40434
ARMC1	Armadillo repeat-containing protein 1	9.08919	3.57463	0	0	0	0	0	0	0	0	0	0	0	0	0	0	3.39413
ARMC8	Armadillo repeat-containing protein 8	17.5965	4.91056	6.56772	3.52666	2.87137	0.643543	0	13.6517	2.42357	0	9.1283	0	4.48079	0	2.83744	4.03585	3.47959
ARMCX1	Armadillo repeat-containing X-linked protein 1	0	1.80814	0	0	0	1.4675	0	5.04761	0	4.34187	0	0	0	0	1.46935	6.15651	2.14303
ARMCX2	Armadillo repeat-containing X-linked protein 2	3.66206	0	0	0	4.82379	11.7999	0	0	3.98342	1.77287	0	0	0	0	6.18624	1.33763	3.8916
ARMCX3	Armadillo repeat-containing X-linked protein 3	0	4.69495	0	0	0	0	0	0	0	0	0	0	0	0	0	0	0
ARMT1	Damage-control phosphatase ARMT1	5.23028	14.1492	0	32.001	7.05162	4.95082	2.71259	8.32886	3.07791	12.4531	6.65105	21.2169	17.6626	0	5.33859	4.61673	7.48908
ARPC1A	Actin-related protein 2/3 complex subunit 1A	0	11.5699	9.64305	7.2772	6.0882	10.7196	3.58001	7.66453	8.20458	7.24898	0	5.988	7.82446	6.40364	12.0984	13.2445	22.4403
ARPC1B	Actin-related protein 2/3 complex subunit 1B	0	5.13016	2.84456	5.13016	0	0	0	0	0	35.973	0	9.22108	0	8.15318	9.74376	12.2471	26.0933
ARPC2	Actin-related protein 2/3 complex subunit 2	15.7988	12.2922	12.2922	14.8616	9.39266	10.0456	0	16.0911	8.86046	15.3348	14.9586	19.1109	13.5442	0	12.3602	24.5378	27.5061
ARPC3	Actin-related protein 2/3 complex subunit 3	52.6533	23.117	16.3236	16.5106	9.72946	14.621	10.6484	21.2464	10.3958	13.573	22.5782	14.1541	12.4209	14.4486	17.69	20.2132	45.7855
ARPC4	Actin-related protein 2/3 complex subunit 4;Isoform of P59998, Isoform 3 of Actin-related protein 2/3 complex subunit 4	14.7342	12.9877	7.02125	14.0237	9.0717	12.1221	7.03695	14.1249	12.8102	19.619	15.3741	11.8545	16.064	20.7648	12.1794	63.4505	35.3044
ARPC5	Actin-related protein 2/3 complex subunit 5	0	0	0	0	0	0	0	0	0	0	0	0	0	0	0	0	48.3758
ARPC5L	Actin-related protein 2/3 complex subunit 5-like protein	10.5009	7.79347	0	0	4.82491	8.88745	0	8.24491	3.78143	8.8895	14.4907	6.04758	8.21967	0	8.52956	41.3842	17.1762
ARPIN	Isoform of Q7Z6K5, Isoform C15orf38-AP3S2 of Arpin	0	0	0	0	0	0	0	0	0	0	0	0	0	0	0	0	5.84021
ARPP19	cAMP-regulated phosphoprotein 19	0	4.94118	4.94118	4.94118	0	0	0	0	0	0	0	0	7.44311	0	0	10.5374	0
ARRB1	Isoform of P49407, Isoform 1B of Beta-arrestin-1	0	0	0	0	0	0	0	0	0	0	0	0	0	0	0	0	1.4042
ARSB	Arylsulfatase B	0	0	0	0	0	0	0	0	3.20226	5.5947	0	0	0	0	3.01111	9.8409	5.61084
ART1	GPI-linked NAD(P)(+)--arginine ADP-ribosyltransferase 1	4.1959	0	2.84063	4.85807	0	0	2.33338	8.91222	0	3.51461	5.51049	3.10086	0	1.71406	0	0	0
ART3	Ecto-ADP-ribosyltransferase 3	54.7426	7.99707	12.21	24.4604	5.8249	3.34255	3.32648	14.2458	2.23489	6.61115	0	7.99617	3.93237	5.99967	0	1.88684	3.77945
ARVCF	Splicing regulator ARVCF;Isoform of O00192, Isoform Short of Splicing regulator ARVCF	2.22139	8.48654	4.58896	8.48654	6.42967	0	8.40978	7.53157	0	1.42553	0	11.1066	5.16243	0	0	0	3.85237
ASAH1	Acid ceramidase;Isoform of Q13510, Isoform 2 of Acid ceramidase	0	0	0	0	0	0	0	0	0	0	0	0	8.18756	0	0	19.7622	0
ASB1	Ankyrin repeat and SOCS box protein 1	0	0	0	0	2.30032	0	0	0	17.3803	0	0	0	0	0	0	0	0
ASB10	Ankyrin repeat and SOCS box protein 10;Isoform of Q8WXI3, Isoform 2 of Ankyrin repeat and SOCS box protein 10	0	2.37592	0	0	1.19341	3.32259	0	0	0.503218	1.28967	0	0	0.933801	0	1.2689	1.08302	1.38461
ASB11	Isoform of Q8WXH4, Isoform 3 of Ankyrin repeat and SOCS box protein 11	0	31.0335	0	0	39.6177	82.4665	0	0	0	0	0	0	49.0743	0	0	32.154	0
ASB12	Ankyrin repeat and SOCS box protein 12	0	18.5537	27.6703	0	19.6241	13.4517	0	0	16.6171	42.7639	0	29.7497	16.2463	46.2517	12.6831	20.3018	0
ASB14	Ankyrin repeat and SOCS box protein 14;Isoform of A6NK59, Isoform 3 of Ankyrin repeat and SOCS box protein 14	0	3.53452	4.69045	3.53452	2.35987	2.64592	0	0	1.94875	4.05021	0	2.32157	2.74002	0	2.31754	2.37977	4.33439
ASB15	Ankyrin repeat and SOCS box protein 15	0	0	0	0	0	3.35025	0	0	0	0	0	0	1.82161	0	0	0	0
ASB16	Ankyrin repeat and SOCS box protein 16	0	0	0	0	0	0	0	0	0	0	0	0	0	0	0.530673	0	0
ASB2	Ankyrin repeat and SOCS box protein 2;Isoform of Q96Q27, Isoform 2 of Ankyrin repeat and SOCS box protein 2	20.2593	4.956	12.6274	13.9883	9.0717	9.73817	12.8761	16.9428	5.33527	8.80191	14.7025	12.755	6.48417	13.5278	6.82695	6.77696	8.43584
ASB4	Ankyrin repeat and SOCS box protein 4	0	0	0	0	0	0	0	0	0	0	0	0	0	2.97939	0	0	0
ASB5	Ankyrin repeat and SOCS box protein 5	0	0	2.57404	3.34321	3.04782	1.98874	2.29395	5.12254	0	1.49892	0	1.66181	1.90746	2.38412	0	1.11979	0
ASB6	Ankyrin repeat and SOCS box protein 6	0	0	7.49574	13.1845	0	5.14254	0	7.87564	0	4.35389	0	0	5.34631	5.72041	0	0	0
ASH1L	Histone-lysine N-methyltransferase ASH1L;Isoform of Q9NR48, Isoform 2 of Histone-lysine N-methyltransferase ASH1L	48.0757	0	0	64.7387	3.6215	0	65.4161	0	9.71306	27.4838	121.532	19.8236	0	59.2826	0	0	0
ASPA	Aspartoacylase	0	30.9479	0	0	0	0	7.09063	0	0	0	0	23.0612	0	0	0	3.15744	12.2132
ASPH	Aspartyl/asparaginyl beta-hydroxylase	407.873	28.9089	312.043	249.267	23.5228	22.4635	139.343	102.091	15.7346	54.0104	66.2049	45.6123	19.0921	116.447	18.0812	193.212	21.3417
ASPH	Isoform of Q12797, Isoform 3 of Aspartyl/asparaginyl beta-hydroxylase	1950.41	1575.18	2697.21	1392.72	2191.23	1108.61	1277.28	1659.91	1763.42	1578.98	846.818	1312.75	883.598	2302.12	921.354	4357.47	1023.6
ASPN	Asporin	362.431	18.4472	26.8853	83.3996	7.42145	18.2758	30.8663	61.0781	15.7165	17.7246	152.964	58.3689	6.3468	44.0785	13.3176	17.2518	19.3076
ASPSCR1	Isoform of Q9BZE9, Isoform 2 of Tether containing UBX domain for GLUT4	0	0	0	0	0	0	0	83.6923	0	0	0	0	0	0	3.46598	0	0
ASS1	Argininosuccinate synthase	0	12.7125	0	0	6.67097	10.1666	196.193	29.6747	14.5833	21.09	0	16.8415	6.99285	169.835	18.8593	11.6905	12.3631
ATAD1	Outer mitochondrial transmembrane helix translocase	74.8558	9.10607	40.125	101.921	7.73017	12.6759	40.5961	75.2984	7.09343	74.435	96.6919	22.6299	6.22952	90.3914	6.0218	12.1881	10.6814
ATAD3A	Isoform of Q9NVI7, Isoform 2 of ATPase family AAA domain-containing protein 3A	126.132	16.8202	29.3843	51.0933	13.8449	19.7687	37.3925	57.7811	11.8047	57.3426	82.4689	26.423	8.42858	60.7893	15.6396	16.9486	17.9485
ATE1	Isoform of O95260, Isoform ATE1-2 of Arginyl-tRNA--protein transferase 1	0	0	0	0	4.02892	2.63923	0	0	25.9213	2.98523	0	0	5.75645	0	0.699402	4.02286	0
ATG12	Ubiquitin-like protein ATG12	0	0.341925	0	0	0	0	0	0	0	0	0	0	0.303917	0	0	0	0
ATG16L1	Autophagy-related protein 16-1;Isoform of Q676U5, Isoform 2 of Autophagy-related protein 16-1	60.3984	11.626	0	122.367	24.2655	51.2362	139.696	0	0	0	0	72.5407	35.905	0	0	0	0
ATG2A	Autophagy-related protein 2 homolog A;Isoform of Q2TAZ0, Isoform 2 of Autophagy-related protein 2 homolog A	57.2698	30.369	54.2894	39.5881	22.2684	22.7079	45.5077	42.1974	27.5015	29.1123	37.6522	44.9968	24.8917	33.4062	26.2498	0	33.0924
ATG3	Ubiquitin-like-conjugating enzyme ATG3	0	6.40517	6.40517	6.40517	0	0	0	0	0	0	0	0	0	0	0	0	0
ATG4B	Cysteine protease ATG4B;Isoform of Q9Y4P1, Isoform 2 of Cysteine protease ATG4B;Isoform of Q9Y4P1, Isoform 6 of Cysteine protease ATG4B	0	0	0	0	0	0	0	0	0	0	79.2483	0	42.8405	0	0	0	0
ATG7	Ubiquitin-like modifier-activating enzyme ATG7	0	5.63678	0	0	3.59906	2.53675	0	0	0	1.87188	0	0	2.8032	0	0	3.65708	5.78666
ATG9A	Autophagy-related protein 9A	0	0	7.71285	0	0	0	50.1285	14.9998	0	6.59747	126.064	0	0.430283	0	0	0	0
ATIC	Bifunctional purine biosynthesis protein ATIC	40.6935	0	0	79.7561	0	17.4814	0	0	0	0	0	0	0	0	27.6584	0	0
ATL2	Atlastin-2	176.289	14.9084	3.14206	16.1571	11.6088	67.8855	0	0	0	0	0	0	20.7756	0	93.1594	3.51427	0
ATP12A	Potassium-transporting ATPase alpha chain 2;Isoform of P54707, Isoform 2 of Potassium-transporting ATPase alpha chain 2	11.1026	0	0	0	0	0	0	0	0	0	0	0	0	0	0	0	0
ATP13A1	Endoplasmic reticulum transmembrane helix translocase;Isoform of Q9HD20, Isoform B of Endoplasmic reticulum transmembrane helix translocase	16.3993	0	0	2.99064	0	0	5.26968	2.14825	1.2259	4.6385	5.17595	2.94837	0	4.61347	0	1.30237	0
ATP1A1	Sodium/potassium-transporting ATPase subunit alpha-1;Isoform of P05023, Isoform 4 of Sodium/potassium-transporting ATPase subunit alpha-1	43.1842	14.2341	48.0634	40.0649	12.0973	28.746	33.0358	43.0711	0	34.8078	122.065	17.9053	20.1723	41.8145	12.1906	129.848	14.3261
ATP1A2	Sodium/potassium-transporting ATPase subunit alpha-2	115.938	77.1136	74.6818	159.244	26.3444	30.8161	64.9359	128.258	17.8179	67.6982	72.9441	55.1673	54.4696	108.424	28.4267	44.242	51.9551
ATP1A4	Sodium/potassium-transporting ATPase subunit alpha-4	0	6.79408	10.29	15.5763	2.22069	1.6139	6.88152	12.2881	0	8.76349	17.5182	6.74655	3.58554	10.9781	1.18066	2.48734	1.11078
ATP1B1	Sodium/potassium-transporting ATPase subunit beta-1;Isoform of P05026, Isoform 2 of Sodium/potassium-transporting ATPase subunit beta-1	99.1346	80.1735	65.5563	123.698	26.4234	26.5997	49.1343	128.465	14.0526	63.6615	56.884	48.3039	49.0292	97.2136	29.9176	40.9388	51.0891
ATP1B3	Sodium/potassium-transporting ATPase subunit beta-3	0	1.1317	0	0	0	0	0	0	0	0	0	0	0	0	0	0	2.57471
ATP1B4	Protein ATP1B4;Isoform of Q9UN42, Isoform B of Protein ATP1B4	0	4.63587	5.744	6.65831	5.94551	4.92127	7.54023	7.9852	2.46977	3.21127	0	4.11417	7.98279	7.33208	5.08542	3.6672	5.55173
ATP2A1	Sarcoplasmic/endoplasmic reticulum calcium ATPase 1	15585.7	1276.53	5233.77	12914.1	934.305	271.505	3166.54	7557.63	280.192	1272.26	2761.15	2264.03	678.664	6792.46	184.768	353.781	585.232
ATP2A2	Sarcoplasmic/endoplasmic reticulum calcium ATPase 2	16204.1	2093.3	9712.13	15594.2	867.738	1057.49	6977.26	10301.2	643.511	11420.3	12066.7	6237.09	931.01	8128.82	723.48	992.281	1040.71
ATP2B1	Isoform of P20020, Isoform D of Plasma membrane calcium-transporting ATPase 1;Isoform of P20020, Isoform C of Plasma membrane calcium-transporting ATPase 1	2.14006	3.03481	4.6229	3.78498	0	0	0	9.54082	0	0	0	0	1.92954	0	0	9.3054	3.0292
ATP2B2	Plasma membrane calcium-transporting ATPase 2	55.8889	1.36468	0	16.0607	0	0	0	0	0	29.8935	0	0	0	0	0	0	0
ATP2C1	Calcium-transporting ATPase type 2C member 1;Isoform of P98194, Isoform 2 of Calcium-transporting ATPase type 2C member 1;Isoform of P98194, Isoform 3 of Calcium-tra	0	0	0	0	0	94.3577	0	0	0	0	0	0	0	0	0	0	0
ATP4A	Potassium-transporting ATPase alpha chain 1	968.78	0	8.71796	0	0	0	0	0	0	0	0	0	0	8.78268	0	0	0
ATP5F1A	ATP synthase subunit alpha, mitochondrial	2788.85	1978.93	2649.2	2492.67	781.608	1043.94	1172.96	1916.84	717.226	2659.97	2290.29	1610.21	873.684	1925.87	1000.52	2015.28	1336.68
ATP5F1B	ATP synthase subunit beta, mitochondrial	675.967	1106.19	1012.55	836.497	1289.7	1061.4	277.067	708.738	768.168	1344.55	490.106	640.003	1301.83	698.92	912.277	2607.56	607.615
ATP5F1C	Isoform of P36542, Isoform Heart of ATP synthase subunit gamma, mitochondrial	764.76	281.599	1127.75	1596.48	115.901	129.532	983.75	1774.13	65.8349	1958.29	2157.7	940.55	139.077	1475.12	63.2305	189.992	123.177
ATP5F1D	ATP synthase subunit delta, mitochondrial	1720.38	103.402	382.838	643.671	26.5393	24.3488	345.052	671.098	12.063	580.467	631.379	324.849	48.5461	474.599	16.9522	38.8092	24.2286
ATP5F1E	ATP synthase subunit epsilon, mitochondrial	332.296	97.3489	239.947	379.983	47.4667	68.7349	200.302	398.461	44.2136	246.137	454.873	129.384	64.0995	371.473	60.0657	126.775	81.7764
ATP5IF1	ATPase inhibitor, mitochondrial	47.9982	51.4435	53.4705	62.0246	42.3047	58.9627	54.4483	63.6775	25.0643	88.0394	81.9012	51.6633	59.6286	54.9322	39.5755	33.1005	40.9099
ATP5MC1	ATP synthase F(0) complex subunit C1, mitochondrial;ATP synthase F(0) complex subunit C3, mitochondrial;ATP synthase F(0) complex subunit C2, mitochondrial;Isoform of Q	0	0	0	0	0	34.1489	0	0	0	0	0	0	0	0	0	0	0
ATP5ME	ATP synthase subunit e, mitochondrial	4867.72	124.374	404.683	371.505	38.5557	99.2836	362.564	437.709	26.5312	546.987	582.492	288.126	61.5821	484.203	70.7012	73.6775	97.035
ATP5MF	Isoform of P56134, Isoform 2 of ATP synthase subunit f, mitochondrial;Isoform of P56134, Isoform 4 of ATP synthase subunit f, mitochondrial	734.726	355.002	1061.73	1560.5	99.0806	188.008	557.679	1562.74	74.2089	1935.43	1964.22	568.96	99.5072	1554.63	160.15	145.357	161.075
ATP5MG	ATP synthase subunit g, mitochondrial	6377.13	776.124	2119.41	3250.6	479.059	456.118	1581.56	2966.1	323.561	3704.05	3013.63	1266.14	312.935	2599.13	414.693	545.802	469.492
ATP5MJ	ATP synthase subunit ATP5MJ, mitochondrial	66.8537	263.834	591.309	685.589	121.252	103.342	480.269	713.322	99.7599	455.908	603.935	363.649	82.3293	619.765	126.598	154.645	187.944
ATP5MK	ATP synthase membrane subunit K, mitochondrial	1166.88	227.945	261.285	322.154	130.554	141.149	196.284	317.97	93.3375	274.269	226.459	162.586	88.4005	278.822	148.466	199.818	167.93
ATP5PB	ATP synthase F(0) complex subunit B1, mitochondrial	947.601	316.833	954.805	1483.08	200.812	153.454	728.928	1598.03	103.504	2021.52	2262.51	535.281	120.103	1560.01	152.59	249.594	202.688
ATP5PD	ATP synthase subunit d, mitochondrial	1051.05	1407.12	1188.54	888.514	926.593	817.857	780.521	967.8	580.038	1005.95	770.176	687.673	507.288	901.42	633.763	2015.28	1180.13
ATP5PF	ATP synthase-coupling factor 6, mitochondrial;Isoform of P18859, Isoform 2 of ATP synthase-coupling factor 6, mitochondrial	299.244	56.3289	71.9805	68.7961	29.093	46.2463	185.859	110.608	20.4388	54.3848	33.8758	38.7509	25.4188	64.8376	23.8576	57.6016	25.4114
ATP5PO	ATP synthase subunit O, mitochondrial	639.33	349.567	507.358	698.336	172.064	181.459	277.131	483.488	142.317	535.522	537.886	276.555	208.667	381.177	188.16	537.817	283.549
ATP6V0C	V-type proton ATPase 16 kDa proteolipid subunit c	0	16.3054	12.1595	0	9.64248	0	11.9422	19.9658	0	9.8147	0	13.7462	0	14.68	0	8.08044	0
ATP6V0D1	V-type proton ATPase subunit d 1	0	18.6479	10.7082	26.1315	6.35607	17.4051	0	24.4955	0	0	0	0	60.9192	0	8.35654	18.0982	17.4473
ATP6V1A	V-type proton ATPase catalytic subunit A	30.7982	52.5449	37.1719	21.9262	44.8837	33.8748	2.55437	23.2266	17.016	11.4334	0	13.5233	45.4731	9.41949	25.0626	58.3626	24.1173
ATP6V1B2	V-type proton ATPase subunit B, brain isoform	0	15.2943	0	0	3.60652	0	0	0	0	0	0	0	3.77968	0	0	5.12784	0
ATP6V1C1	V-type proton ATPase subunit C 1	0	24.7988	0	0	14.484	0	0	0	17.7728	35.3002	0	0	0	0	15.6793	19.4955	27.3419
ATP6V1D	V-type proton ATPase subunit D	0	2.68677	0	0	0	0	0	0	0	0	0	0	0	0	1.67698	35.9613	0
ATP6V1E1	V-type proton ATPase subunit E 1	3.23687	5.29335	5.43894	10.7464	1.23535	0	0	0	2.9961	0	0	5.50151	1.68676	0	2.64196	4.91513	3.39413
ATP6V1F	V-type proton ATPase subunit F;Isoform of Q16864, Isoform 2 of V-type proton ATPase subunit F	0	0	0	0	0	0	0	0	0	0	21.0228	0	0	0	0	0	0
ATP6V1G1	V-type proton ATPase subunit G 1	39.7398	8.86402	0	0	12.1784	4.79377	0	0	3.86951	12.8404	0	0	6.47671	0	5.20867	39.4217	9.1123
ATP6V1H	V-type proton ATPase subunit H;Isoform of Q9UI12, Isoform 2 of V-type proton ATPase subunit H	0	8.20032	0	27.7501	0	6.08944	0	0	0	0	0	0	4.20489	0	3.37619	5.51867	5.12187
ATP8A1	Phospholipid-transporting ATPase IA;Isoform of Q9Y2Q0, Isoform 2 of Phospholipid-transporting ATPase IA	0	3.33988	0	9.43766	0	0	0	8.92659	0	4.82811	0	4.534	0	8.97485	0	0	0
ATP9A	Probable phospholipid-transporting ATPase IIA	0	0	0	0	0	0	0	2.71823	0	0	0	0	0	0	0	0	0
ATPAF1	ATP synthase mitochondrial F1 complex assembly factor 1	0	0	0	0	0	0	0	0	0	0	0	0	0.786782	0	0	0	0
ATPAF2	ATP synthase mitochondrial F1 complex assembly factor 2	0	3.76557	0	0	0	0	0	0	0	0	0	0	3.34083	0	0	0	3.71559
ATRX	Transcriptional regulator ATRX;Isoform of P46100, Isoform 2 of Transcriptional regulator ATRX	5.60177	7.25155	4.14491	3.99912	8.88564	6.96269	6.8436	4.36502	4.51083	4.80925	0	3.49367	7.68342	6.70853	6.10277	27.5191	8.98728
ATXN10	Ataxin-10	0	0	4.5763	0	3.50662	0	8.92246	0	0	0	11.4127	0	0	0	2.06646	0	0
ATXN2	Ataxin-2;Isoform of Q99700, Isoform 2 of Ataxin-2;Isoform of Q99700, Isoform 4 of Ataxin-2	0	0	0	0	0	16.5683	0	0	0	0	0	0	0	0	0	0	0
ATXN2L	Ataxin-2-like protein;Isoform of Q8WWM7, Isoform 2 of Ataxin-2-like protein;Isoform of Q8WWM7, Isoform 3 of Ataxin-2-like protein;Isoform of Q8WWM7, Isoform 4 of Ata	0	0	0	0	0	36.4315	0	0	0	0	0	0	0	0	0	0	0
AUH	Methylglutaconyl-CoA hydratase, mitochondrial	0	55.7739	0	0	13.1217	0	0	0	0	73.9907	0	0	0	29.2905	111.206	455.863	19.9356
AUP1	Lipid droplet-regulating VLDL assembly factor AUP1	59.0915	0	10.2239	0	0	0	7.26582	29.1666	0	6.14861	0	0	0	12.9636	0	14.2967	0
AVEN	Cell death regulator Aven	0	19.1483	21.6728	0	0	1.26759	0	0	0	0	0	14.8622	2.77622	0	7.25983	11.3824	0
AZGP1	Zinc-alpha-2-glycoprotein	0	0	0	0	0	0	0	0	0	0	5.7795	0	0	0	0	0	0
AZU1	Azurocidin	0	0	0	0	0	0	0	0	0	3.22313	0	5.34911	0.582847	0	2.41061	2.95621	0.983622
B2M	Beta-2-microglobulin	3.11405	2.43126	0	0	0	0	0	0	0	0	13.3995	4.65245	2.11327	0	0	0	5.9351
B3GALNT2	UDP-GalNAc:beta-1,3-N-acetylgalactosaminyltransferase 2	0	0	0	0	0	0	0	0	0	136.829	0	0	0	0	0	0	0
B3GLCT	Beta-1,3-glucosyltransferase	0	0	0	0	0	0	0	0	0	0	0	0	0	0	0	0	2.64684
BABAM1	BRISC and BRCA1-A complex member 1	0	3.2933	0	0	9.07588	0	0	0	0	0	0	0	4.99292	0	0	0	0
BABAM2	BRISC and BRCA1-A complex member 2	0	0.958806	4.08051	0.958806	0	0.937945	0	0	0	0	0	3.90645	5.40449	0	0	6.21062	0
BACE1	Beta-secretase 1;Isoform of P56817, Isoform B of Beta-secretase 1;Isoform of P56817, Isoform C of Beta-secretase 1;Isoform of P56817, Isoform D of Beta-secretase 1	0	7.00859	7.00859	7.00859	14.8316	2.34249	0	0	0	11.1835	0	0	6.77103	0	0	11.5036	15.1645
BAG1	BAG family molecular chaperone regulator 1	0	0	0	0	0	0	0	0	0	0	0	0	4.82452	0	0	0	0
BAG2	BAG family molecular chaperone regulator 2	101.397	3.9658	15.9667	0	0	0	10.7	25.0603	1.63778	2.65324	0	7.79618	2.49606	5.01796	0	6.13246	0
BAG3	BAG family molecular chaperone regulator 3	66.2255	19.7893	28.0359	31.9274	8.54454	8.00898	52.7819	63.2391	8.38024	22.0078	57.9149	30.2052	7.03646	17.8208	5.66404	79.9346	11.8149
BAG5	BAG family molecular chaperone regulator 5;Isoform of Q9UL15, Isoform 2 of BAG family molecular chaperone regulator 5	0	37.847	41.0785	59.9742	39.9934	0	26.1508	42.3239	27.987	0	0	30.5831	0	0	0	0	0
BAG6	Large proline-rich protein BAG6;Isoform of P46379, Isoform 2 of Large proline-rich protein BAG6;Isoform of P46379, Isoform 3 of Large proline-rich protein BAG6	23.138	0	0	0	2.51414	0	0	0	11.3804	0	0	0	8.51049	0	0	7.03453	0
BAK1	Isoform of Q16611, Isoform 2 of Bcl-2 homologous antagonist/killer	19.6709	0	6.19319	0	1.78685	0	0	9.32794	0	3.51218	0	0	0	10.0352	0	0	0
BANF1	Barrier-to-autointegration factor	48.3309	1743.13	725.963	123.414	973.17	1834.33	1013.41	657.485	2293.8	215.069	200.304	1295.63	1276.31	166.85	2430.67	783.132	2257.5
BAP18	Chromatin complexes subunit BAP18;Isoform of Q8IXM2, Isoform 3 of Chromatin complexes subunit BAP18	0	0	0	0	7.04837	5.07198	0	0	5.7631	0	0	0	7.61122	0	5.48058	27.7674	4.72638
BAZ1B	Tyrosine-protein kinase BAZ1B;Isoform of Q9UIG0, Isoform 2 of Tyrosine-protein kinase BAZ1B	39.1675	19.1219	19.1219	55.3814	18.0796	20.9931	50.1516	53.2213	17.5775	45.1208	100.714	27.8024	20.0057	50.2258	25.6287	110.417	24.5261
BCAM	Basal cell adhesion molecule	53.0793	23.5413	36.6197	48.469	8.54257	8.41158	27.1259	46.5035	4.03977	25.2567	58.9373	24.9105	6.14122	25.2074	0	7.1209	0
BCAP29	B-cell receptor-associated protein 29	44.599	9.94331	16.4367	62.8296	3.06329	4.92127	34.2914	67.6684	8.42861	18.4789	54.8896	28.2086	9.00647	52.2068	7.01014	11.4271	23.1168
BCAP31	B-cell receptor-associated protein 31;Isoform of P51572, Isoform 2 of B-cell receptor-associated protein 31	134.47	14.3262	49.8786	85.9932	16.4774	4.04741	63.1953	68.7679	14.2284	41.9254	129.625	38.2104	10.7933	79.878	9.75274	20.1853	16.5283
BCAS3	Isoform of Q9H6U6, Isoform 5 of BCAS3 microtubule associated cell migration factor	0	0	0	0	0	8.22768	7.37708	0	0	10.0595	0	0	0	0	0	0	0
BCAT2	Branched-chain-amino-acid aminotransferase, mitochondrial	99.1118	0	0	0	69.0699	0	59.908	72.3246	0	0	0	82.1451	0	0	0	0	0
BCKDHA	2-oxoisovalerate dehydrogenase subunit alpha, mitochondrial	15.1086	12.7359	19.108	8.64299	6.91495	11.1912	16.4735	21.9021	5.83521	29.4156	9.90809	17.4857	6.08772	14.2013	8.21158	22.1786	15.1575
BCKDHB	2-oxoisovalerate dehydrogenase subunit beta, mitochondrial	15.6576	8.54537	25.8592	12.8933	6.29345	13.9597	2.40927	19.6284	6.84473	45.2144	17.0958	21.5616	5.71945	20.5176	11.3325	22.0361	16.4751
BCKDK	[3-methyl-2-oxobutanoate dehydrogenase [lipoamide]] kinase, mitochondrial	14.3921	6.57856	11.5163	13.5851	6.06581	4.41446	7.825	17.51	10.0729	23.0079	17.7211	12.1586	6.19376	13.716	6.61343	19.043	15.0532
BCL2	Apoptosis regulator Bcl-2	5.12301	3.02852	1.17819	9.4507	3.78782	0	0	2.40373	0	0	0	0	0	2.67133	0	0	0
BCL2L13	Bcl-2-like protein 13	60.9853	11.7579	22.9517	63.4694	5.38876	3.18183	9.93081	50.0018	2.02515	23.4789	20.5206	16.6066	7.27536	24.7359	2.60511	6.49583	5.23514
BCLAF1	Bcl-2-associated transcription factor 1;Isoform of Q9NYF8, Isoform 2 of Bcl-2-associated transcription factor 1	21.4548	31.1839	20.7737	5.20432	7.01599	25.0367	5.74757	13.6485	6.83528	10.3652	0	16.8804	13.8725	2.81532	21.3563	102.102	30.2363
BCO2	Carotenoid-cleaving dioxygenase, mitochondrial;Isoform of Q9BYV7, Isoform 2 of Carotenoid-cleaving dioxygenase, mitochondrial;Isoform of Q9BYV7, Isoform 4 of Carotenoid-cleaving dioxygena	0	0	0	0	0	10.0341	0	0	0	0	0	0	0	0	0	0	0
BCS1L	Mitochondrial chaperone BCS1	185.151	19.626	32.7503	0	21.8619	0	0	38.0264	15.9645	37.4522	0	29.9973	27.4761	36.5702	18.3538	19.5585	14.5287
BDH1	D-beta-hydroxybutyrate dehydrogenase, mitochondrial	134.78	107.456	64.7761	18.7743	54.1737	64.6513	8.65934	43.6803	34.6303	83.5367	32.7409	27.7512	49.5626	23.0849	92.0506	111.182	52.5688
BDH2	Dehydrogenase/reductase SDR family member 6	0	0	0	0	0	0	0	0	0	0	7.35343	0	0	0	0	0	0
BET1	BET1 homolog	0	0	0	0	0	0	0	0	0	0.784291	0	0	0	0	0	0	0
BGN	Biglycan	35.5816	30.6218	29.4046	45.6314	8.96786	11.724	26.5146	48.1821	8.72883	13.7302	73.8227	39.0105	14.8955	31.0261	11.3143	24.1677	62.6366
BIN1	Isoform of O00499, Isoform BIN1+12A of Myc box-dependent-interacting protein 1	437.346	488.125	487.096	468.667	189.099	229.075	218.265	397.545	151.69	313.89	523.468	293.82	223.437	399.878	242.397	271.291	403.022
BLMH	Bleomycin hydrolase	0	15.6002	10.0372	15.6002	4.8416	8.36715	0	0	0	0	0	4.10754	12.0546	0	0	40.1268	0
BLVRA	Biliverdin reductase A	5.35335	7.68831	0	39.1349	3.8698	0	0	0	1.34945	0	0	0	2.63242	0	7.23147	6.6963	4.86327
BLVRB	Flavin reductase (NADPH)	53.5211	40.0526	47.0668	34.9836	25.6442	21.5863	17.5382	63.3995	19.4203	49.5424	63.972	62.1558	56.1377	25.3938	24.8786	40.1361	29.0555
BMS1	Ribosome biogenesis protein BMS1 homolog	0	0	0	0	3.54151	0	0	0	0	0	0	0	4.70603	0	4.65829	30.4463	2.21426
BNIP1	Vesicle transport protein SEC20;Isoform of Q12981, Isoform 3 of Vesicle transport protein SEC20	0	0	4.93872	12.2226	5.24794	0	3.40161	0	3.9351	2.84824	9.59379	2.2682	2.45728	0	0	8.58687	0
BNIP3	BCL2/adenovirus E1B 19 kDa protein-interacting protein 3	46.9813	45.6385	74.1165	75.6596	27.1637	98.8046	35.6356	74.2995	8.59323	46.1293	38.4849	47.0199	13.6005	77.1485	9.67446	29.1833	43.5942
BOLA2B	BolA-like protein 2	0	0	0	0	0	0	0	0	0	0	0	0	0	0	0	10.7259	0
BOP1	Ribosome biogenesis protein BOP1;Isoform of Q14137, Isoform 2 of Ribosome biogenesis protein BOP1	0	0	0	0	0	0	0	0	4.72015	0	0	9.49253	0	0	0	13.4442	0
BORCS5	BLOC-1-related complex subunit 5	0	0	0	0	0	0	0	0	0	0	0	0	0	0	0	5.67198	0
BPHL	Isoform of Q86WA6, Isoform 2 of Valacyclovir hydrolase	3.21755	4.13267	0	0	3.73929	0.859364	0	0	0	16.7833	0	0	9.43527	12.9876	3.64608	13.0477	7.67411
BPI	Bactericidal permeability-increasing protein	0	0	0	0	4.84718	0	0	0	0	12.9592	0	0	5.39082	0	19.8713	0	8.84969
BPIFA1	BPI fold-containing family A member 1;Isoform of Q9NP55, Isoform 2 of BPI fold-containing family A member 1	0	12.4833	12.4833	12.4833	0	0	0	0	0	0	0	0	0	0	0	0	0
BPNT1	3'(2'),5'-bisphosphate nucleotidase 1	0	0	0	0	0	0	0	0	0	0	0	0	0	0	0	0	5.24117
BPNT2	Golgi-resident adenosine 3',5'-bisphosphate 3'-phosphatase	0	5.20033	0	40.6503	1.62476	0	0	0	0	0	0	0	0	0	0	0	0
BRAWNIN	Protein BRAWNIN	0	18.2361	49.9706	18.8784	0	0	19.9198	46.9338	0	50.6264	22.0085	11.1682	17.9124	20.1756	8.90485	0	37.2845
BRCC3	Lys-63-specific deubiquitinase BRCC36;Isoform of P46736, Isoform 1 of Lys-63-specific deubiquitinase BRCC36	0	3.38245	5.82257	3.38245	1.8063	0	0	0	0	0	0	0	1.52846	0	0	0	2.66826
BRD2	Bromodomain-containing protein 2;Isoform of P25440, Isoform 2 of Bromodomain-containing protein 2;Isoform of P25440, Isoform 3 of Bromodomain-containing protein 2;Isoform of P25440, I	0	0	0	0	0	2.9763	0	0	0	0	0	0	0	0	0	0	0
BRD3	Bromodomain-containing protein 3	0	12.5467	8.40455	8.40455	10.5776	9.10494	0	8.12243	11.9057	6.47109	0	5.6726	9.81645	0	10.9327	14.5994	14.7309
BRD4	Bromodomain-containing protein 4	0	8.43395	8.43395	8.43395	12.9386	11.953	0	0	10.4221	10.011	0	0	15.7817	0	10.3211	55.9802	10.3521
BRD9	Bromodomain-containing protein 9	0	0	0	0	0	0	24.4278	34.6725	0	0	13.6864	0	0	0	0	0	0
BRI3	Isoform of O95415, Isoform 2 of Brain protein I3	0	0	0	0	0	0	0	0	0	0	0	10.1434	0	0	0	0	0
BRIP1	Fanconi anemia group J protein	7.04896	16.3957	13.1073	16.3706	16.2888	9.98567	6.7918	12.3136	8.18005	33.1953	18.3438	16.0023	30.779	25.7767	6.98597	19.6895	9.51324
BRIX1	Ribosome biogenesis protein BRX1 homolog	0	0	0	0	5.76884	0	0	0	0	0	0	0	6.49762	0	3.65617	45.9129	0
BRK1	Isoform of Q8WUW1, Isoform 2 of Protein BRICK1	24.0616	15.6903	19.0509	20.6093	6.9054	10.9189	14.3809	21.266	9.61737	21.9623	22.459	17.2935	7.13928	17.054	10.1374	12.0208	13.91
BROX	BRO1 domain-containing protein BROX	0	0	0	0	2.083	1.65568	0	1056.3	1.24296	2.15515	0	0	2.66597	0	0	7.06537	0.709787
BRPF1	Peregrin;Isoform of P55201, Isoform 3 of Peregrin	0	1.78661	1.78661	1.78661	1.45174	1.83475	0	0	2.80644	1.7546	0	0	3.76231	0	1.73192	11.1464	0
BSG	Basigin;Isoform of P35613, Isoform 2 of Basigin	477.008	72.2488	65.3604	110.551	29.3825	26.0542	30.4779	46.5035	16.7786	46.1931	24.7623	37.5649	45.1185	41.9592	23.3683	43.7054	32.3317
BST1	ADP-ribosyl cyclase/cyclic ADP-ribose hydrolase 2;Isoform of Q10588, Isoform 2 of ADP-ribosyl cyclase/cyclic ADP-ribose hydrolase 2	89.4593	39.8319	0	85.6375	13.8832	20.0853	0	85.6418	14.3007	0	93.6678	61.3736	23.6132	0	10.5834	21.7939	13.0505
BST2	Bone marrow stromal antigen 2;Isoform of Q10589, Isoform 2 of Bone marrow stromal antigen 2	0	4.95942	14.1324	28.2075	7.82508	8.75341	18.1964	26.0307	1.71221	18.0958	45.435	19.7552	2.91175	26.5967	2.91492	7.24995	0
BTF3	Transcription factor BTF3	241.838	345.486	282.498	102.203	263.626	342.908	114.653	144.539	161.048	286.733	72.5588	238.277	136.444	116.259	357.295	659.986	300.696
BTF3L4	Transcription factor BTF3 homolog 4	160.26	193.389	185.958	61.5551	132.828	101.129	73.9409	91.619	97.4891	131.274	39.336	102.466	75.5535	72.4815	130.565	556.974	153.154
BTN3A3	Butyrophilin subfamily 3 member A3;Isoform of O00478, Isoform 2 of Butyrophilin subfamily 3 member A3	0	0	32.3232	0	0	0	0	0	0	0	12.128	0	0	0	0	0	0
BTNL9	Butyrophilin-like protein 9	0	32.1315	32.9697	89.9009	0	0	32.0542	0	0	16.7678	59.3595	24.1592	0	0	0	0	0
BUB3	Mitotic checkpoint protein BUB3;Isoform of O43684, Isoform 2 of Mitotic checkpoint protein BUB3	3.95208	5.58381	5.58381	5.58381	4.73902	0	0	0	5.6488	5.32325	0	0	8.64877	0	3.95027	14.5089	6.53323
BVES	Blood vessel epicardial substance	8.56693	0	2.22748	6.72147	0.535166	0	3.10946	4.15514	0	1.58262	3.42444	2.34036	0	3.31992	0	0	0
BZW1	eIF5-mimic protein 2;Isoform of Q7L1Q6, Isoform 3 of eIF5-mimic protein 2;Isoform of Q7L1Q6, Isoform 4 of eIF5-mimic protein 2	0	13.8909	0	0	6.47424	0	0	0	0	0	0	0	10.994	0	8.22672	0	6.06916
BZW2	eIF5-mimic protein 1	145.521	100.145	56.5086	84.7938	53.7637	48.0372	33.0815	46.1302	30.3918	20.0945	45.1846	29.7771	48.2897	30.7063	56.7057	41.1372	57.6273
C11orf54	Ester hydrolase C11orf54;Isoform of Q9H0W9, Isoform 2 of Ester hydrolase C11orf54	0	0	0	0	0	0	0	0	0	0	0	0	0	0	0	2.4925	0
C15orf61	Uncharacterized protein C15orf61	0	0	4.78536	12.1973	2.53331	0	0	13.7939	0	11.5472	0	0	0	13.5777	0	0	0
C19orf25	UPF0449 protein C19orf25;Isoform of Q9UFG5, Isoform 2 of UPF0449 protein C19orf25	6.45543	0	0	0	0	0	0	0	0	0	0	0	0	0	0	0	0
C19orf47	Uncharacterized protein C19orf47;Isoform of Q8N9M1, Isoform 2 of Uncharacterized protein C19orf47;Isoform of Q8N9M1, Isoform 3 of Uncharacterized protein C19orf47	0	0	0	0	0	0	0	0	0	0	0	0	0	0	0	11.1438	0
C1orf52	UPF0690 protein C1orf52;Isoform of Q8N6N3, Isoform 2 of UPF0690 protein C1orf52	0	0.588343	0.588343	0.588343	0	0	0	0	0	0	0	0	0	0	0	0	0
C1QA	Complement C1q subcomponent subunit A	19.6981	21.278	24.3845	52.9742	14.9138	21.9673	530.255	62.746	11.6026	63.8818	2860.16	78.4299	14.9298	41.5937	23.5628	15.4005	26.1594
C1QB	Complement C1q subcomponent subunit B	109.705	24.9937	31.6894	56.8544	20.2903	9.88957	39.3989	40.5122	12.7543	63.5151	168.225	103.248	13.1327	20.0829	33.3524	18.4942	24.0895
C1QBP	Complement component 1 Q subcomponent-binding protein, mitochondrial	229.311	81.345	145.383	252.385	26.4599	31.3601	53.6518	215.023	15.6047	126.642	130.074	63.3406	65.3213	153.613	15.6144	37.9433	25.0166
C1QC	Complement C1q subcomponent subunit C	51.5733	31.2558	17.7711	58.1252	13.8098	14.2324	21.5419	42.686	18.0616	22.5412	68.4684	36.3397	20.6754	22.2396	33.5449	26.0636	28.0368
C1QTNF9	Complement C1q and tumor necrosis factor-related protein 9A	0	1.54181	1.54181	1.54181	0.276241	0.896969	0	0	0	2.66365	0	0	0	3.52555	1.19269	1.53262	1.07629
C1R	Complement C1r subcomponent	0	0	15.0735	0	0	4.86158	0	0	0	5.36386	0	12.609	0	0	1.62527	0	0
C1S	Complement C1s subcomponent	41.8529	20.9619	13.6118	70.1074	14.907	22.0942	48.7511	68.5624	17.6139	52.7566	124.965	26.423	19.2644	62.8677	26.3832	25.9857	9.84528
C2orf88	Small membrane A-kinase anchor protein	0	9.20091	9.20091	9.20091	0	0	0	0	0	0	0	0	6.52761	0	9.11647	10.1961	6.86323
C3	Complement C3	25.7055	11.0594	13.3081	29.7621	15.8266	8.92848	67.9023	74.7112	14.0235	33.3179	101.576	23.6364	13.1691	16.2079	18.3707	28.565	29.1091
C4A	Complement C4-A	26.2921	16.8551	41.3823	50.2417	16.1804	9.88274	58.1413	49.6462	15.0438	21.0755	70.9235	25.573	10.1287	22.4092	17.7798	14.8571	13.8717
C4B	2_Complement C4-B	0	7.27832	0	0	0	0	0	0	0	0	0	0	0	0	0	0	0
C4BPA	C4b-binding protein alpha chain	6.95225	4.18149	0	5.74995	4.40746	2.88521	7.65569	24.2262	5.58671	10.5895	856.229	8.71128	5.78835	0	9.02665	4.56494	8.23812
C4BPB	C4b-binding protein beta chain;Isoform of P20851, Isoform 2 of C4b-binding protein beta chain	0	0	0	0	0	1.85728	0	0	0	0	0	6.27454	2.52787	0	0	0	0
C4orf54	Uncharacterized protein C4orf54	39.4299	5.29214	27.7661	58.7441	4.80384	6.66312	50.5225	48.5049	7.00578	28.1629	88.3874	22.6559	7.18215	60.51	2.43347	23.358	4.61029
C5	Complement C5	0	0	0	0	0	0	0	0	0	0	41.0289	0	0	0	2.1544	0	0
C6	Complement component C6	0	0	0	11.8758	0	0	0	0	0	0	0	0	5.57127	0	0	0	0
C6orf136	Uncharacterized protein C6orf136;Isoform of Q5SQH8, Isoform 2 of Uncharacterized protein C6orf136;Isoform of Q5SQH8, Isoform 3 of Uncharacterized protein C6orf136;Isoform of Q5SQH	0	0	0	0	0	2.76298	0	0	0	0	0	0	0	0	0	0	0
C6orf47	Uncharacterized protein C6orf47	0	1.72556	0	14.824	3.5636	0	1.9651	0	0	0	0	2.68029	0	0	0	36.0608	0
C7	Complement component C7	0	0	0	0	0	0	0	0	11.3255	0	0	0	0	0	0	0	0
C7orf50	Uncharacterized protein C7orf50	0	3.54104	0	0	6.98858	5.44474	0	0	5.45577	0	0	0	2.00472	0	5.36323	8.20984	2.50108
C8A	Complement component C8 alpha chain	0	0	0	0	0	0	0	0	0	0	18.6247	0	0	0	0	0	0
C8B	Complement component C8 beta chain	0	4.78995	15.6861	20.949	3.17095	0	18.458	40.4749	0	0	28.9995	7.97961	0	10.6103	0	3.86754	9.2689
C8G	Complement component C8 gamma chain	0	0	0	0	0	0	30.6256	0	0	0	23.8391	0	0	0	0	0	0
C8orf34	Uncharacterized protein C8orf34;Isoform of Q49A92, Isoform 3 of Uncharacterized protein C8orf34	0	21.4354	21.4354	21.4354	0	0	0	0	0	0	0	0	0	0	0	0	0
C8orf82	Isoform of Q6P1X6, Isoform 2 of UPF0598 protein C8orf82	9.9661	5.19674	0	0	8.30403	2.71005	0	5.21658	6.07654	7.60286	13.9762	6.10635	6.73836	0	9.04121	0	6.16777
C9	Complement component C9	0	7.09792	0	0	0	0	0	0	0	0	0	0	0	0	10.3211	0	0
C9orf64	Queuosine salvage protein	729.5	0	479.418	9.55134	0	0	727.754	794.485	0	0	956.952	0	0	0	0	0	0
CA14	Carbonic anhydrase 14	3.34138	0	0	0	0	0	0	4.21004	0	0	0	0	19.8406	13.9549	0	16.8358	0
CA3	Carbonic anhydrase 3	67.0695	151.996	68.82	176.996	88.4482	74.1613	94.9696	120.112	60.9055	146.176	269.582	92.5086	197.585	140.161	45.6801	296.439	61.465
CA4	Carbonic anhydrase 4	47.1547	0	17.148	20.872	6.2949	2.82278	11.6811	14.7362	0	16.2135	11.9369	10.5434	0	5.08777	0	0	0
CA8	Carbonic anhydrase-related protein	0	0	0	0	0	0	0	8.7415	0	0	0	0	0	0	0	0	0
CAB39	Calcium-binding protein 39	0	2.48903	1.90904	0	6.88317	3.56761	0	0	2.68817	0	0	1.64544	5.95051	0	1.76533	3.73194	2.05413
CACNA1A	Isoform of O00555, Isoform 4 of Voltage-dependent P/Q-type calcium channel subunit alpha-1A;Isoform of O00555, Isoform 6 of Voltage-dependent P/Q-type calcium channel subunit alpha-1A	0	0	0	0	0	0	0	5.82218	0	0	5.03257	0	0	11.1052	0	0	0
CACNA1D	Isoform of Q01668, Isoform Beta-cell-type of Voltage-dependent L-type calcium channel subunit alpha-1D	18.6821	0	6.44636	6.57755	0	0	6.09375	6.66938	0	3.24323	9.60263	4.92359	0	5.65363	0	0	0
CACNA1S	Voltage-dependent L-type calcium channel subunit alpha-1S	123.744	30.3062	73.1332	186.451	14.086	17.6757	88.5492	121.335	10.1591	43.7499	105.097	46.0237	22.801	114.558	11.7281	14.2048	23.069
CACNA2D1	Voltage-dependent calcium channel subunit alpha-2/delta-1	353.936	42.6315	133.756	293.268	27.8733	14.5907	169.662	257.446	16.0382	97.9438	159.731	109.215	29.3869	172.873	10.243	18.7947	12.7711
CACNB1	Isoform of Q02641, Isoform 2 of Voltage-dependent L-type calcium channel subunit beta-1	67.3946	108.826	64.5676	47.716	27.0202	35.1704	27.809	58.6794	17.0473	20.0668	24.8995	42.8926	28.0837	28.069	39.8682	80.7114	70.328
CACNB3	Voltage-dependent L-type calcium channel subunit beta-3;Isoform of P54284, Isoform 2 of Voltage-dependent L-type calcium channel subunit beta-3;Isoform of P54284, Isoform 3 of V	0	0	0	0	0	28.4431	0	0	0	0	0	0	0	0	0	0	0
CACNG1	Voltage-dependent calcium channel gamma-1 subunit	128.951	33.4065	91.1832	190.926	60.1158	17.4372	107	169.155	27.7368	61.373	118.601	46.9874	46.9196	135.934	21.6036	105.18	12.6773
CACNG6	Voltage-dependent calcium channel gamma-6 subunit	0	9.20727	0	0	21.867	5.45353	0	0	12.4985	0	0	0	15.0645	16.7621	8.58473	22.1174	6.54377
CACYBP	Calcyclin-binding protein	0	6.457	0	0	0	0	0	0	7.03001	0	0	0	15.2284	0	0	24.925	0
CAD	CAD protein	0	5.0726	3.69585	0	7.5195	4.76296	2.39709	0	0	6.44135	0	3.41022	0	0	6.294	10.3356	0
CALD1	Caldesmon	13.1077	17.6657	16.9284	6.05291	3.57675	9.32346	4.96118	12.9983	5.13755	12.7021	10.0021	11.489	5.83653	9.37405	16.5816	39.9701	53.5831
CALHM5	Calcium homeostasis modulator protein 5	0	0	0	0	0	0	0	0	0	11.6353	0	0	0	0	0	0	0
CALM2	Calmodulin-2	365.111	465.298	255.279	284.095	239.656	171.032	129.863	218.115	146.945	88.9974	119.506	144.538	353.228	165.664	157.734	369.517	269.171
CALR	Calreticulin	0	31.3784	12.0009	7.81203	6.55977	6.15003	0	115.448	1.51899	1.7115	0	0	10.8831	2.7703	7.04736	11.6959	6.7831
CALU	Calumenin;Isoform of O43852, Isoform 3 of Calumenin	154.962	31.8296	7.81834	15.9244	4.82602	6.21838	3.50417	8.10748	3.32933	0	9.1199	8.09621	6.49314	0	8.33157	10.5569	15.2696
CAMK1	Calcium/calmodulin-dependent protein kinase type 1	0	0	0	0	0	0	0	0	0.585944	0	0	0	0	0	0	0.79714	0
CAMK2A	Calcium/calmodulin-dependent protein kinase type II subunit alpha	1570.09	53.7813	163.348	313.447	39.6633	52.8905	299.561	289.325	54.7339	165.988	347.448	115.74	70.2837	259.315	56.4972	55.3267	63.8746
CAMK2A	Isoform of Q9UQM7, Isoform B of Calcium/calmodulin-dependent protein kinase type II subunit alpha	3.35835	0	0	0	0	0	3.16654	0	0	0	6.3517	0	0	0	0	0	0
CAMK2B	Calcium/calmodulin-dependent protein kinase type II subunit beta	154.357	67.8002	97.1213	238.267	43.9631	53.3553	154.449	159.951	51.1512	93.7945	224.59	84.0005	53.377	144.254	51.8235	86.1856	73.4562
CAMK2D	Isoform of Q13557, Isoform Delta 9 of Calcium/calmodulin-dependent protein kinase type II subunit delta	120.206	58.7802	80.0414	157.349	30.0946	44.5325	105.047	128.317	34.5188	89.6143	135.204	82.0317	42.4868	95.5933	32.1386	109.43	43.6645
CAMK2G	Isoform of Q13555, Isoform 6 of Calcium/calmodulin-dependent protein kinase type II subunit gamma	78.8361	34.9085	47.2732	131.967	28.1442	24.5176	57.9542	64.8613	23.8647	35.5203	85.9588	32.4999	19.7676	54.1411	21.9395	26.8371	25.4524
CAMSAP1	Calmodulin-regulated spectrin-associated protein 1;Isoform of Q5T5Y3, Isoform 3 of Calmodulin-regulated spectrin-associated protein 1	21.9495	2.86834	14.1259	0	4.33899	6.16137	1.17729	0	5.93685	14.9444	0	9.91475	3.10566	22.8627	4.65507	55.3267	2.39844
CAND1	Cullin-associated NEDD8-dissociated protein 1	61.1963	9.75059	14.2402	16.6328	6.64491	6.0517	22.4897	29.3688	4.13291	30.1146	6.19998	18.6501	8.02518	26.0932	4.98915	10.773	9.39135
CAND2	Cullin-associated NEDD8-dissociated protein 2	73.7777	72.9341	102.262	90.0667	27.5099	17.0403	30.1776	29.6064	13.4603	23.8769	43.6104	33.883	30.0438	16.4447	13.0715	22.4613	27.2413
CANX	Calnexin;Isoform of P27824, Isoform 2 of Calnexin	133.391	20.7602	37.6283	100.987	9.82854	5.78599	24.0649	52.0099	5.31442	23.4087	34.7288	16.7757	10.7338	26.268	4.80205	16.2381	11.8503
CAP1	Adenylyl cyclase-associated protein 1	0	6.42142	2.62008	24.8236	13.6832	6.73562	6.00322	10.6386	9.76914	6.94508	0	5.00359	18.3001	11.4638	7.1093	34.4298	4.17185
CAP2	Adenylyl cyclase-associated protein 2	18.127	42.6413	41.3537	31.7077	79.4491	54.46	20.5015	44.4412	59.4369	44.2667	30.1155	29.7702	69.1122	47.0032	37.0192	112.729	29.6776
CAPN1	Calpain-1 catalytic subunit	54.9067	39.1229	60.5222	86.729	21.0179	14.719	27.7067	35.9075	12.381	20.2245	46.1945	23.4197	28.54	34.62	15.3153	42.8879	30.6569
CAPN2	Calpain-2 catalytic subunit	32.7812	57.6144	45.9319	48.8387	20.9165	16.5797	13.4426	31.3824	5.93275	16.8646	6.65105	39.9008	27.775	13.1804	12.2159	28.0243	39.676
CAPN3	Calpain-3	124.201	70.9955	82.4546	116.376	37.2125	44.4403	57.7543	89.678	34.991	57.0134	78.3592	47.9051	47.017	69.0124	44.8566	100.632	109.832
CAPN7	Calpain-7	69.94	27.8889	76.5622	54.4207	37.8694	34.8079	49.7605	79.9624	40.5094	82.0875	72.2753	65.0402	29.2452	80.6357	33.8943	64.2148	52.0389
CAPNS1	Calpain small subunit 1	62.9253	55.9926	44.9484	64.4116	40.058	46.3743	28.3782	34.8085	16.4648	19.5784	25.7804	25.7503	80.9384	22.0306	28.1985	52.4487	42.2307
CAPRIN1	Caprin-1;Isoform of Q14444, Isoform 2 of Caprin-1	0	8.32589	8.32589	8.32589	5.74763	6.1373	0	0	7.25866	0	0	0	6.23526	0	6.00519	11.5594	5.70201
CAPZA1	F-actin-capping protein subunit alpha-1	26.5354	6.75353	16.9245	23.7063	8.12435	4.73127	21.5072	9.62245	8.3475	10.0618	14.9655	11.3679	9.67062	21.4155	4.72309	20.4143	9.83849
CAPZA2	F-actin-capping protein subunit alpha-2	517.995	261.114	262.612	338.582	174.216	212.264	211.829	322.393	193.311	189.181	320.989	211.048	196.995	206.123	244.414	187.903	330.848
CAPZB	F-actin-capping protein subunit beta	0	0	0	0	0	0	0	0	7.23363	0	0	0	0	18.3327	0	12.2528	0
CAPZB	Isoform of P47756, Isoform 2 of F-actin-capping protein subunit beta	85.5117	227.683	184.465	257.255	157.141	212.852	165.991	259.29	167.863	139.501	256.384	181.085	173.043	171.367	200.367	202.785	252.888
CARD16	Caspase recruitment domain-containing protein 16;Isoform of Q5EG05, Isoform 2 of Caspase recruitment domain-containing protein 16	0	1.82949	1.82949	1.82949	0	0	0	0	0	0	0	0	0	0	0	0	0
CARD19	Isoform of Q96LW7, Isoform 2 of Caspase recruitment domain-containing protein 19	36.6628	5.13962	20.5549	39.1619	0	0	24.7221	34.8807	0	14.9547	45.7288	11.8681	3.79013	35.8531	0	1.98123	4.85655
CARM1	Histone-arginine methyltransferase CARM1;Isoform of Q86X55, Isoform 1 of Histone-arginine methyltransferase CARM1	11.4005	5.14554	8.58252	21.8205	4.45953	2.51291	7.48315	8.73345	1.23099	3.5594	19.1465	4.28827	5.24752	8.09519	2.26739	3.01117	5.30675
CARNS1	Isoform of A5YM72, Isoform 3 of Carnosine synthase 1;Isoform of A5YM72, Isoform 5 of Carnosine synthase 1	0	14.0744	9.04929	14.5433	3.1102	0	0	42.2071	0	25.3266	0	0	6.8858	0	10.0098	0	6.10279
CARS1	Isoform of P49589, Isoform 3 of Cysteine--tRNA ligase, cytoplasmic	11.8939	8.17581	17.9397	10.0338	7.34326	5.47618	8.9348	0	2.26337	9.2316	0	8.60958	10.9838	11.3744	6.07752	5.25212	4.80981
CARS2	Probable cysteine--tRNA ligase, mitochondrial	0	15.3473	0	0	14.7261	8.27708	0	0	7.54842	0	0	0	5.12572	0	6.08593	9.50681	13.5715
CASK	Peripheral plasma membrane protein CASK;Isoform of O14936, Isoform 3 of Peripheral plasma membrane protein CASK	0	0	0	0	0	0	0	0	4.8591	0	0	0	0	0	18.2527	0	6.48975
CASKIN2	Caskin-2;Isoform of Q8WXE0, Isoform 2 of Caskin-2	0	0	0	0	0	0	0	0	0	0	95.4531	37.1776	26.4152	0	0	0	0
CASP7	Caspase-7;Isoform of P55210, Isoform Alpha' of Caspase-7	0	0	0	0	0	0	0	2.25261	0	0	0	0	0	0	0	0	0
CASQ1	Calsequestrin-1	10932.6	11353.5	10264	4987.28	1498.96	2885.87	4650.34	6078.35	2778.15	2715.05	5527.01	4731.32	1776.05	7384.6	2806.25	3446.16	6427.3
CASQ2	Calsequestrin-2	1082.74	1375.72	939.755	412.633	286.41	524.056	407.46	338.365	320.816	867.116	809.823	978.547	231.555	274.111	439.164	888.045	829.523
CAST	Isoform of P20810, Isoform 6 of Calpastatin	986.337	821.544	488.444	0	36.2234	1261.18	399.286	775.15	779.213	1802.51	1082.66	1111.94	621.949	0	1001.67	1004.7	786.916
CAT	Catalase	0	0	0	0	0	0	0	0	0	0	0	0	0	0	7.42039	0	0
CAV1	Caveolin-1	409.19	220.207	260.204	203.687	78.9021	133.192	222.221	331.731	39.3873	236.961	440.038	235.604	73.9358	373.876	16.249	169.291	40.08
CAV2	Caveolin-2	0	6.19771	11.7223	10.372	2.94842	3.22535	7.97783	14.6112	1.22055	10.9592	28.9861	9.88057	0	17.4031	0	7.30188	0
CAV3	Caveolin-3	43.7951	25.6762	42.2197	44.7779	7.79092	12.0831	29.9216	39.1549	0	21.0852	44.1052	28.0855	13.5006	39.2308	0	14.6769	5.89018
CAVIN1	Caveolae-associated protein 1	110.745	103.641	111.69	162.879	70.0791	60.7683	93.0432	106.484	27.8392	87.4938	130.674	61.5293	67.5234	62.1766	35.7789	66.3643	64.5994
CAVIN2	Caveolae-associated protein 2	14.1751	24.6508	23.6818	16.868	12.8555	11.0606	10.4204	14.6213	5.77373	15.1627	17.0173	7.81955	11.7342	7.71662	2.85448	14.9636	11.9187
CAVIN3	Caveolae-associated protein 3	0	5.29579	0	0	0	0	0	0	0	0	0	0	2.96657	0	1.44886	0	10.4985
CAVIN4	Caveolae-associated protein 4	100.56	54.2914	78.0036	116.162	63.2687	58.0333	67.0324	67.4351	39.1973	87.4535	119.479	67.6055	55.8798	52.0388	47.5255	48.8917	55.1986
CBR1	Carbonyl reductase [NADPH] 1	0	0	4.68505	0	0	0	7.12172	0	0	0	13.9956	0	0	0	0	0	0
CBR4	3-oxoacyl-[acyl-carrier-protein] reductase	0	6.32457	10.0511	0	0	9.92836	0	0	11.1932	70.9214	0	0	13.4293	0	13.2503	39.2405	0
CBX3	Chromobox protein homolog 3	0	7.81503	7.81503	7.81503	2.01739	6.89568	0	0	4.87143	0	0	0	3.20667	0	7.91456	0	9.90212
CBX5	Chromobox protein homolog 5	0	9.34181	9.34181	9.34181	1.40213	3.64231	0	0	3.44236	0	0	0	0	0	4.02464	28.7167	5.42286
CC2D1A	Coiled-coil and C2 domain-containing protein 1A	25.8182	22.8524	31.9091	10.8609	11.3263	12.7637	12.885	16.9155	5.9478	13.5668	46.2158	15.8848	8.01594	17.1328	9.88159	8.91117	14.6463
CC2D1B	Isoform of Q5T0F9, Isoform 2 of Coiled-coil and C2 domain-containing protein 1B	0	3.49246	4.39455	0	2.35716	15.3807	37.3237	0	0	0	0	21.0563	2.32946	0	1.41393	0	1.98943
CCAR1	Cell division cycle and apoptosis regulator protein 1;Isoform of Q8IX12, Isoform 2 of Cell division cycle and apoptosis regulator protein 1	6.98434	12.2979	9.39322	0	12.0279	10.3057	3.63065	7.52984	5.74323	7.30428	0	9.52756	10.9384	8.27232	11.8639	32.7066	16.8278
CCAR2	Cell cycle and apoptosis regulator protein 2	0	14.2047	0	0	0	0	27.4653	0	0	0	0	0	0	0	0	0	0
CCDC110	Coiled-coil domain-containing protein 110;Isoform of Q8TBZ0, Isoform 2 of Coiled-coil domain-containing protein 110	11.7605	23.0267	0	23.9202	24.5578	17.3012	14.0827	30.0321	10.9612	24.1756	18.2806	17.6922	34.4631	23.9898	7.78622	20.684	15.2872
CCDC12	Coiled-coil domain-containing protein 12	0	0	0	0	0	0	0	0	0	0	0	0	0	0	0	1.13929	0
CCDC124	Coiled-coil domain-containing protein 124	80.0065	92.3913	127.589	73.8353	196.015	177.983	80.3313	84.4667	161.606	226.661	53.5414	99.6052	158.327	152.38	162.303	125.094	101.002
CCDC125	Coiled-coil domain-containing protein 125	0	0	0	0	0.619282	0.352109	0	0	1.04029	0	0	0	0	0	0	0	0.685217
CCDC127	Coiled-coil domain-containing protein 127	9.97988	0	10.6295	32.8673	7.94674	4.27639	32.1133	40.2333	5.63711	27.3575	58.707	19.3857	0	39.0596	3.44688	3.99241	0
CCDC18	Coiled-coil domain-containing protein 18;Isoform of Q5T9S5, Isoform 2 of Coiled-coil domain-containing protein 18	0	5.8672	5.8672	5.8672	0	0	0	0	0	0	0	0	0	0	0	7.10289	4.33439
CCDC180	Coiled-coil domain-containing protein 180	44.1901	28.3159	32.7276	41.14	9.34951	0	40.6616	42.578	16.8677	47.8715	86.7741	30.6043	13.2085	44.3636	17.9113	0	31.0619
CCDC22	Coiled-coil domain-containing protein 22	0	0	0	0	0	1.11065	0	0	0	10.3152	0	1.901	0	0	0.73948	4.08917	4.00339
CCDC25	Coiled-coil domain-containing protein 25	0	0	0	0	0	0	0	0	0	0	0	0	0	0	0	13.4164	0
CCDC39	Coiled-coil domain-containing protein 39	0	0	0	0	1.87581	0	0	0	0	6.88933	0	0	0	0	0	0	1.46767
CCDC47	PAT complex subunit CCDC47;Isoform of Q96A33, Isoform 2 of PAT complex subunit CCDC47	43.8153	35.2477	42.9452	14.8205	35.8913	26.1082	23.3069	21.0371	18.6233	48.4481	14.9655	35.1141	25.9033	31.523	43.6744	31.1483	44.661
CCDC50	Coiled-coil domain-containing protein 50	3.37773	0	0	0	0	0	0	0	0	0	0	0	0	0	0	3.63777	0.818706
CCDC51	Mitochondrial potassium channel	0	0	0	6.2354	2.81312	0	0	6.85466	0	6.9084	0	4.17236	3.80763	0	0	0	0
CCDC6	Coiled-coil domain-containing protein 6	0	0	3.63341	0	0	0	0	0	0	0	0	3.06466	0	0	5.76006	0	2.26219
CCDC86	Coiled-coil domain-containing protein 86	0	7.37787	7.37787	7.37787	10.4157	10.0202	0	0	8.53604	24.9676	0	17.7044	8.59517	0	13.0025	24.7022	12.6861
CCDC90B	Isoform of Q9GZT6, Coiled-coil domain-containing protein 90B, mitochondrial	0	3.41374	3.41374	3.41374	0	0	0	0	0	0	0	0	2.75965	0	0	0	0
CCDC91	Coiled-coil domain-containing protein 91;Isoform of Q7Z6B0, Isoform 2 of Coiled-coil domain-containing protein 91	0	11.8122	14.6021	17.9624	5.62197	0	6.43257	4.00669	0	0	0	0	0	0	3.06215	0	8.88236
CCDC93	Coiled-coil domain-containing protein 93	0	8.06364	15.4069	9.14038	8.94723	10.1456	0	4.02611	6.43511	23.965	0	13.0071	10.7363	16.264	9.90665	21.2195	10.0353
CCDC97	Coiled-coil domain-containing protein 97	0	0	50.9465	0	13.6738	0	0	0	12.102	0	0	28.4827	22.8799	0	35.288	64.3183	0
CCDC9B	Coiled-coil domain-containing protein 9B;Isoform of Q6ZUT6, Isoform 4 of Coiled-coil domain-containing protein 9B	0	12.733	0	0	20.0765	15.5517	0	0	9.17817	33.4717	0	18.046	8.55568	6.80499	16.2715	20.6459	15.6469
CCNY	Cyclin-Y;Isoform of Q8ND76, Isoform 3 of Cyclin-Y	0	0.780425	0.780425	0.780425	0	0	0	0	0	0	0	0	0	0	0	0	0
CCPG1	Isoform of Q9ULG6, Isoform 5 of Cell cycle progression protein 1	17.4713	10.1843	15.5745	14.2976	19.0717	10.5142	6.51905	10.9015	9.92102	15.4981	13.6518	7.69453	11.9882	16.8046	8.39512	10.2597	0
CCS	Copper chaperone for superoxide dismutase	0	0	0	0	0	0	0	0	0	0	0	9.45762	0	0	0	0	0
CCSMST1	Protein CCSMST1	0	0	2.44858	8.52637	0	0	0	2.91599	0	4.79819	5.28312	0	1.69299	3.4852	0	0	0
CCT2	T-complex protein 1 subunit beta	70.5871	28.0887	22.8357	27.1122	16.6069	21.1192	15.7465	17.1746	11.0067	13.2885	56.6357	19.3144	20.3636	12.7388	15.1331	24.3408	17.2238
CCT3	T-complex protein 1 subunit gamma	40.8437	50.4697	47.9639	72.9901	33.3802	33.1419	33.2112	49.2704	17.5048	30.1215	67.5601	31.5778	40.286	30.7912	22.4299	47.7898	38.4263
CCT4	T-complex protein 1 subunit delta	209.616	80.2104	67.238	70.2044	40.8591	61.5712	34.9611	50.6857	42.36	43.871	41.888	35.9072	155.473	40.3021	45.6065	97.1706	58.5367
CCT5	T-complex protein 1 subunit epsilon	53.9045	31.2918	27.6958	35.3317	16.0136	17.7165	13.3225	22.8395	10.7586	13.2488	22.5108	15.5196	20.2747	16.193	12.5698	29.2573	22.6531
CCT6A	T-complex protein 1 subunit zeta	73.2867	44.2212	50.9114	67.2766	24.0264	29.6673	36.0649	44.1048	20.2561	28.1953	43.45	31.2091	31.9856	34.0351	22.4712	38.9166	33.5682
CCT6B	T-complex protein 1 subunit zeta-2	16.0703	17.9817	15.6536	0	0	11.8107	0	30.7033	7.31234	11.5632	9.21913	9.3429	13.7263	0	8.42804	118.832	15.2943
CCT7	T-complex protein 1 subunit eta	92.8165	61.863	44.6699	81.934	30.6541	43.7802	26.0726	30.2194	19.8315	20.6908	51.4032	35.187	31.1784	19.1394	32.339	44.7852	36.9767
CCT8	T-complex protein 1 subunit theta	119.213	48.2648	37.8281	42.9501	29.0395	23.3441	17.3135	31.9217	16.9885	20.6813	21.3398	22.5674	32.4455	16.6237	19.6303	41.7383	31.3421
CCZ1	Vacuolar fusion protein CCZ1 homolog	0	0	0	466.621	0	0	0	1318.21	0	0	0	0	0	0	0	0	0
CD151	CD151 antigen	82.6086	0	5.95819	0	0	0	0	5.87876	0	0	0	3.55535	2.13086	5.77334	0	0	2.12192
CD163	Scavenger receptor cysteine-rich type 1 protein M130	0	0	0	0	0	22.4325	0	37.9565	0	0	0	0	27.3309	0	0	0	0
CD209	CD209 antigen;Isoform of Q9NNX6, Isoform 2 of CD209 antigen;Isoform of Q9NNX6, Isoform 6 of CD209 antigen	0	0	7.52687	0	0	0	0	0	0	0	0	0	0	0	0	11.1618	0
CD2AP	CD2-associated protein	10.2265	0	0	0	3.23734	0	0	9.60917	8.66276	0	0	0	0	0	0	0	0
CD300LG	CMRF35-like molecule 9	0	2.27107	2.27107	2.27107	0	0	0	0	0	0	0	0	0	0	0	0	0
CD34	Hematopoietic progenitor cell antigen CD34	0	0	0	0	0	0	0	0	0	0	0	0	1.08731	0	0	0	0
CD36	Platelet glycoprotein 4	209.134	35.4757	87.8647	170.437	20.5064	20.5484	47.6743	105.387	15.0993	77.1751	67.4357	49.6229	20.8187	81.1946	20.5791	37.483	22.3835
CD38	ADP-ribosyl cyclase/cyclic ADP-ribose hydrolase 1	46.4542	7.02475	6.45379	58.4069	8.16749	0	5.30866	22.5728	0	0	0	5.0209	0	18.5279	0	0	0
CD55	Complement decay-accelerating factor;Isoform of P08174, Isoform 1 of Complement decay-accelerating factor;Isoform of P08174, Isoform 3 of Complement decay-accelerating fac	0	0	0	0	0	1.78804	0	0	0	0	0	0	0	0	0	0	0
CD59	CD59 glycoprotein;Isoform of P13987, Isoform 2 of CD59 glycoprotein	33.199	37.908	57.6122	118.485	22.2428	22.9075	26.1207	83.2311	11.2036	56.5037	60.116	32.7629	25.5479	55.4277	22.0916	31.0982	29.2704
CD5L	CD5 antigen-like	0	4.63907	0	0	0	0	0	0	0	0	0	0	0	0	0	0	0
CD81	CD81 antigen	0	1.40098	1.40098	1.40098	0	0	0	0	0	0	0	0	0	0	0	0	3.3762
CD9	CD9 antigen	0	0	0	50.3923	0	0	76.2754	66.4333	0	45.1312	0	0	0	45.6486	0	0	0
CD93	Complement component C1q receptor	0	3.27213	0	0	0	0	0	0	0	3.53979	25.9412	9.50346	0	0	0	7.58115	3.73877
CD99L2	Isoform of Q8TCZ2, Isoform 3 of CD99 antigen-like protein 2	0	0	0	0	0	0	0	0	0	0	0	0	78.6782	0	0	0	0
CDC123	Cell division cycle protein 123 homolog	0	0	0	0	0	0	3.87779	0	0	0	0	5.52563	0	0	0	0	0
CDC37	Hsp90 co-chaperone Cdc37	153.329	14.9496	0	152.85	10.0159	8.71921	0	0	0	0	0	0	10.8232	0	7.44092	0	10.4889
CDC40	Pre-mRNA-processing factor 17	0	3.58865	3.58865	3.58865	0	0	0	0	0	0	0	0	0	0	0	0	6.49573
CDC42	Cell division control protein 42 homolog	30.4807	48.276	33.7843	46.7589	26.9209	21.3785	15.0343	37.1609	20.4624	23.9981	48.0054	23.8661	35.4123	30.4879	24.5995	45.5549	44.661
CDC42BPA	Isoform of Q5VT25, Isoform 6 of Serine/threonine-protein kinase MRCK alpha	0	0	0	0	0	2.27341	0	0	0	4.96909	0	0	0	0	0	0	0
CDC42BPB	Serine/threonine-protein kinase MRCK beta	0	0	0	0	3.77389	4.26066	0	0	3.23561	7.05305	0	3.17967	2.95498	8.058	2.42955	6.65326	4.36846
CDC42EP4	Cdc42 effector protein 4	0	0	0	0	0	0	0	0	0	0	0	0	0	0	0	9.74843	0
CDC5L	Cell division cycle 5-like protein	12.8744	17.2954	9.27929	9.40945	21.5471	23.9705	11.6382	11.14	18.0201	25.9942	0	16.1132	22.1032	20.9569	27.2538	55.3777	18.4811
CDH11	Cadherin-11	25.9194	0	0	0	0	0	0	0	0	0	0	0	0	0	0	0	0
CDH13	Cadherin-13;Isoform of P55290, Isoform 4 of Cadherin-13	139.581	98.635	85.2932	104.295	23.0988	41.6656	36.6593	91.3873	8.165	45.9491	40.709	62.89	46.212	92.3054	6.01626	59.5573	15.2661
CDH15	Cadherin-15	127.593	12.5265	11.5589	0	0	0	0	9.97667	0	0	0	0	0	0	0	11.9987	0
CDH5	Cadherin-5	0	6.73955	6.73955	6.73955	0	0	0	0	0	0	0	0	0	0	0	0	11.5035
CDIPT	CDP-diacylglycerol--inositol 3-phosphatidyltransferase;Isoform of O14735, Isoform 3 of CDP-diacylglycerol--inositol 3-phosphatidyltransferase	10.5518	2.23116	12.5752	31.2079	1.65268	1.46143	8.13925	23.5768	0.593002	6.37055	27.3332	5.42853	1.41793	15.7227	0	2.87432	2.84923
CDK11A	Cyclin-dependent kinase 11A;Isoform of Q9UQ88, Isoform 4 of Cyclin-dependent kinase 11A;Isoform of Q9UQ88, Isoform SV1 of Cyclin-dependent kinase 11A;Isoform of Q9UQ88, Isoform	0	0	0	0	0	12.3105	0	0	0	0	0	0	0	0	0	0	0
CDK12	Cyclin-dependent kinase 12;Isoform of Q9NYV4, Isoform 2 of Cyclin-dependent kinase 12;Isoform of Q9NYV4, Isoform 3 of Cyclin-dependent kinase 12	0	4.24064	4.24064	4.24064	5.5016	3.65913	0	0	0	0	0	0	7.84973	0	4.59649	0	2.23063
CDK16	Cyclin-dependent kinase 16;Isoform of Q00536, Isoform 2 of Cyclin-dependent kinase 16;Isoform of Q00536, Isoform 3 of Cyclin-dependent kinase 16	32.9325	0	0	0	0	0	31.1017	39.6083	9.93473	0	14.9689	0	0	0	0	0	0
CDK2	Cyclin-dependent kinase 2	0	0	0	0	11.0481	0	0	0	0	0	55.4103	0	5.62412	0	0	6.68397	0
CDK4	Cyclin-dependent kinase 4	0	0	0	0	0	0	0	0	0	0	0	0	1.94292	0	0	0	0
CDK5	Cyclin-dependent kinase 5	0	7.47878	0	0	0	1.67447	0	0	0	0	5.52701	0	0.23744	5.4705	0	0	0
CDK5RAP3	Isoform of Q96JB5, Isoform 4 of CDK5 regulatory subunit-associated protein 3	27.9914	10.1585	11.0462	13.0998	12.7142	10.0642	0	0	10.8832	6.32524	0	6.96437	10.3599	35.7378	9.48477	25.1324	8.97694
CDNF	Cerebral dopamine neurotrophic factor	0	0	0	0	0	0	0	0	0	0	0	0	0	0	0	21.6888	0
CDS2	Phosphatidate cytidylyltransferase 2	65.7848	0	7.58254	10.8684	0	0	6.65096	3.47925	0	7.10194	0	3.15197	0	5.5415	0	0	0
CDV3	Protein CDV3 homolog	0	6.79252	17.3306	6.79252	5.09435	5.95494	18.9751	16.1579	2.72682	0	27.3143	0	4.11959	0	3.42079	6.06087	0
CEBPB	CCAAT/enhancer-binding protein beta;Isoform of P17676, Isoform 2 of CCAAT/enhancer-binding protein beta	6.82221	19.6305	19.2404	19.6305	20.5016	22.8127	8.84066	8.7415	22.8853	21.9825	0	11.4811	20.3871	5.9119	22.056	115.514	11.1539
CEBPZOS	Protein CEBPZOS	0	6.83645	6.83645	6.83645	0	0	0	0	0	0	0	0	0	0	0	0	0
CEFIP	Cardiac-enriched FHL2-interacting protein	95.4169	10.0168	5.89678	12.6347	4.98872	7.97953	13.0673	11.4153	3.8217	7.35321	25.6148	9.1555	3.65557	7.34898	5.07372	5.66676	7.07666
CELF1	Isoform of Q92879, Isoform 4 of CUGBP Elav-like family member 1	14.9977	9.60574	10.2144	14.0237	4.92821	6.88775	8.6753	10.1832	0	10.6507	0	6.38678	6.08772	0	2.31061	6.13246	4.31746
CENPV	Centromere protein V	2.98556	1.76576	1.76576	3.93971	1.04133	1.62247	3.93717	2.23504	1.68483	4.23523	0	1.2359	1.54012	2.01246	1.4874	2.83097	3.5845
CENPV	Isoform of Q7Z7K6, Isoform 3 of Centromere protein V	21.9596	14.3857	14.7644	17.7078	6.99985	9.77411	15.7465	30.7387	10.7289	30.3164	22.3764	11.7161	7.29549	25.1552	11.226	19.1971	19.2765
CEP170	Centrosomal protein of 170 kDa	0	0	0	0	0	3.72115	2.78731	0	0	0	2.24022	0	0	0	0	0	0
CEP85	Centrosomal protein of 85 kDa;Isoform of Q6P2H3, Isoform 2 of Centrosomal protein of 85 kDa	0	2.18389	2.18389	2.18389	0	0	0	0	0	0	0	0	0	0	0	0	0
CEPT1	Choline/ethanolaminephosphotransferase 1	16.8665	4.6135	14.9491	47.4858	0	0	21.8064	27.5858	0	15.9506	26.0669	15.5054	1.63439	26.1533	0	2.59021	2.96776
CERT1	Ceramide transfer protein;Isoform of Q9Y5P4, Isoform 3 of Ceramide transfer protein	1.3447	2.56821	2.56821	2.56821	0	1.98736	0	0	0	0	0	0	1.76301	0	0	1.71252	0
CES2	Cocaine esterase;Isoform of O00748, Isoform 3 of Cocaine esterase	0	2.01433	2.01433	2.01433	1.27113	0	0	0	0	0	0	0	4.63932	0	0	5.60576	0
CFAP251	Cilia- and flagella-associated protein 251	26.7132	12.6424	19.405	0	10.6314	0	0	0	5.47591	0	0	0	33.6786	0	11.6581	18.0857	11.2597
CFB	Complement factor B	0	2.41174	0	0	2.38445	2.74585	26.1207	12.399	2.30174	0	422.562	8.79188	3.11569	0	4.4836	4.10048	4.99377
CFH	Complement factor H	13.9356	21.1072	17.0143	12.3073	13.1549	4.55384	14.7735	21.2415	15.684	31.0011	32.5005	23.4359	13.5786	17.5803	23.6934	18.4644	26.8428
CFHR1	Complement factor H-related protein 1	0	3.88267	1.76407	0	0	0	12.1056	0	0	26.9573	22.0491	49.2472	0	0	0	0	2.05319
CFL1	Cofilin-1	0	18.2151	25.6634	24.8178	12.8762	13.8286	0	20.9646	11.4751	28.7658	25.0721	22.9394	17.9868	17.8044	15.4002	128.687	13.5715
CFL2	Cofilin-2;Isoform of Q9Y281, Isoform 3 of Cofilin-2	306.214	259.855	395.653	731.079	242.822	217.259	280.211	466.322	204.671	401.4	530.017	190.845	370.301	440.988	159.634	407.225	170.58
CFP	Properdin	0	0	0	0	0	0	0	0	0	0	0	4.05212	0	0	0	0	0
CHAD	Chondroadherin	0	4.29073	4.29073	4.29073	6.47126	5.54852	7.44534	0	2.53137	0	0	2.88192	6.40552	0	4.98112	5.5263	20.5697
CHCHD10	Coiled-coil-helix-coiled-coil-helix domain-containing protein 10, mitochondrial	441.19	4.75479	23.5025	31.1146	4.43699	0	0	38.6978	0	34.4808	18.0256	1.51804	4.4295	41.2123	3.92127	7.54458	1.92721
CHCHD2	Coiled-coil-helix-coiled-coil-helix domain-containing protein 2	13.4966	0	17.592	34.2976	2.68528	0	0	8.92865	0	2.92333	8.14123	3.22613	3.9107	19.0997	0	0	0
CHCHD3	MICOS complex subunit MIC19	352.96	68.0191	254.574	492.906	32.9298	50.7431	302.89	510.488	40.1011	235.384	736.529	136.547	57.9768	486.326	44.2616	79.1471	63.1289
CHCHD4	Isoform of Q8N4Q1, Isoform 2 of Mitochondrial intermembrane space import and assembly protein 40	0	3.9494	0	0	2.60729	2.28759	0	0	0	1.03987	0	0	5.46959	0	0	5.37199	1.71446
CHCHD7	Coiled-coil-helix-coiled-coil-helix domain-containing protein 7;Isoform of Q9BUK0, Isoform 2 of Coiled-coil-helix-coiled-coil-helix domain-containing protein 7;Isoform of Q9BUK0, Isofor	0	0	0	0	0	2.9997	0	0	0	0	0	0	0	0	0	0	0
CHD2	Chromodomain-helicase-DNA-binding protein 2;Isoform of O14647, Isoform 2 of Chromodomain-helicase-DNA-binding protein 2	6.76901	5.40046	5.40046	5.40046	11.8683	11.5154	0	8.3866	8.37445	9.56483	0	8.04048	15.6262	11.8803	9.16699	92.3496	9.0163
CHD4	Chromodomain-helicase-DNA-binding protein 4;Isoform of Q14839, Isoform 2 of Chromodomain-helicase-DNA-binding protein 4	0	0	14.2861	0	1.96105	0	12.4849	0	0	0	61.786	0	0	9.45861	0	0	2.08271
CHDH	Choline dehydrogenase, mitochondrial	2.45881	3.7431	0	56.2943	2.85489	0	0	0	18.8173	1.31183	0	1.03224	2.73876	3.77944	1.37097	2.195	1.33023
CHERP	Calcium homeostasis endoplasmic reticulum protein	10.0375	18.316	12.6682	4.22147	27.822	21.1484	5.54606	7.82142	16.0937	20.4917	0	11.1991	29.0706	8.68215	18.8811	79.604	17.784
CHID1	Isoform of Q9BWS9, Isoform 2 of Chitinase domain-containing protein 1	4.79209	5.93787	5.93787	5.93787	2.95385	3.29062	0	0	3.12073	5.26717	0	6.22561	2.95226	3.8648	6.36102	23.9461	7.75404
CHMP1A	Charged multivesicular body protein 1a	0	0	0	0	6.1304	5.26111	0	0	8.08642	17.0678	0	0	11.9359	0	9.68114	0	15.5499
CHMP1B	Charged multivesicular body protein 1b	19.1437	19.3879	22.8884	23.0125	10.2374	9.06311	14.5608	31.6655	15.6912	23.3549	9.78566	20.6149	12.228	31.5085	16.5359	0	26.2499
CHMP2A	Charged multivesicular body protein 2a	0	5.06094	5.06094	11.3022	9.99054	4.11602	9.64017	7.32294	7.08364	16.2696	18.2638	0	10.3456	5.95425	7.79698	9.92281	6.61041
CHMP2B	Charged multivesicular body protein 2b;Isoform of Q9UQN3, Isoform 2 of Charged multivesicular body protein 2b	11.5166	3.11051	7.43386	16.698	0	1.24159	12.0749	0	0	0	20.035	0	0	5.63154	0	0	0
CHMP3	Charged multivesicular body protein 3	0	0	0	26.4767	1.10813	0	0	0	0	0	0	0	1.7205	0	0	0	0
CHMP4B	Charged multivesicular body protein 4b	0	22.2142	0	0	8.47986	5.12717	0	0	0	0	0	0	17.1141	0	5.18235	13.6124	9.29669
CHMP5	Charged multivesicular body protein 5	0	3.18296	0	0	0	0	0	0	0	0	0	0	2.74761	0	0	0	0
CHMP6	Charged multivesicular body protein 6	19.8301	6.43622	12.8444	16.6519	11.2199	5.57157	0	19.5248	13.4883	45.5174	0	81.0741	22.822	26.3043	5.56963	57.8675	0
CHP1	Calcineurin B homologous protein 1	218.336	3.08767	8.55489	11.4463	3.18558	1.60058	5.07557	9.02996	1.04269	7.03521	6.14597	6.93876	1.65217	6.63021	1.00283	4.02101	1.8392
CHRAC1	Chromatin accessibility complex protein 1	0	0	0	0	0	0	0	0	0	0	0	0	0	0	0	1.32811	2.53413
CHTF18	Chromosome transmission fidelity protein 18 homolog;Isoform of Q8WVB6, Isoform 2 of Chromosome transmission fidelity protein 18 homolog	18.2694	24.776	35.4335	15.0475	37.7302	0	39.0647	55.1424	24.6977	54.8122	44.2273	19.0012	0	26.1594	38.6658	0	28.9353
CHTOP	Chromatin target of PRMT1 protein;Isoform of Q9Y3Y2, Isoform 2 of Chromatin target of PRMT1 protein;Isoform of Q9Y3Y2, Isoform 3 of Chromatin target of PRMT1 protein	5.11712	4.85994	4.7986	5.7725	4.9658	8.39996	9.09462	6.61585	2.64701	9.30845	7.02571	5.45233	5.28268	5.44161	3.99049	9.98929	5.42785
CHUK	Inhibitor of nuclear factor kappa-B kinase subunit alpha	0	8.51787	8.51787	8.51787	0	0	0	0	0	0	0	0	0	0	0	0	0
CIAO1	Probable cytosolic iron-sulfur protein assembly protein CIAO1	0	3.9006	12.8031	0	20.8396	0	0	44.8214	0	18.6113	0	0	4.2959	0	0	0	0
CIAO2B	Cytosolic iron-sulfur assembly component 2B	0	1.75886	0	0	0	0	0	14.2655	0	0	0	0	0	0	0	0	0
CIAPIN1	Anamorsin;Isoform of Q6FI81, Isoform 3 of Anamorsin	0	0	0	0	0	0	0	0	0	0	0	0	0	0	0	0	6.33473
CILP	Cartilage intermediate layer protein 1	67.9087	5.7867	43.3126	42.7725	0	0	67.0015	309.732	27.5585	48.4258	178.275	16.1652	20.149	84.9625	0	14.7787	25.3296
CIRBP	Cold-inducible RNA-binding protein	50.2603	91.3547	52.1452	13.408	43.6203	77.1751	15.4129	22.0184	7.99569	28.3516	13.8099	23.4737	8.36478	10.4479	11.3848	7.40176	10.845
CISD1	CDGSH iron-sulfur domain-containing protein 1	341.763	78.8371	219.895	486.703	31.6147	35.406	166.872	469.338	32.2668	178.352	324.631	111.066	60.0834	467.549	48.8457	60.2053	70.5713
CISD2	CDGSH iron-sulfur domain-containing protein 2	44.1393	10.0399	24.9525	45.1715	24.2208	0	25.3854	43.9426	7.80829	27.6425	43.7613	10.1224	6.70895	38.5591	0	9.78667	10.9453
CISD3	CDGSH iron-sulfur domain-containing protein 3, mitochondrial	0	0	10.8796	11.6698	6.31377	5.08835	10.5241	30.6539	4.30483	11.0326	15.0138	8.66527	19.2644	0	0	19.8351	7.66528
CKAP4	Cytoskeleton-associated protein 4	0	2.41396	0	5.96162	4.23437	9.10285	12.4648	0	8.96512	14.7835	30.6895	11.5181	12.2252	22.2191	5.63153	82.9535	8.43584
CKAP5	Cytoskeleton-associated protein 5;Isoform of Q14008, Isoform 2 of Cytoskeleton-associated protein 5;Isoform of Q14008, Isoform 3 of Cytoskeleton-associated protein 5	28.525	18.3836	0	0	6.94367	14.4071	11.0252	13.4056	13.0004	0	6.07282	10.3319	4.57251	0	12.5698	63.4797	22.7682
CKB	Creatine kinase B-type	6.48224	31.7637	20.6973	35.7573	14.0925	21.3539	32.321	154.485	11.8238	47.4873	17.8809	11.7377	18.1825	136.373	25.9553	49.2986	16.9679
CKM	Creatine kinase M-type	2769.65	7384.67	4099.35	5281.58	4905.56	2455.15	2185.17	3270.29	2418	2708.8	4013.19	2691.42	6272.7	2854.48	2233.2	5480.68	1956.72
CKMT1B	Creatine kinase U-type, mitochondrial;Isoform of P12532, Isoform 2 of Creatine kinase U-type, mitochondrial	0	0	0	48.5807	25.0951	0	0	0	18.8824	70.8235	35.3256	0	35.8967	0	0	34.4854	33.414
CKMT2	Creatine kinase S-type, mitochondrial	837.193	687.117	900.149	878.545	365.417	528.418	347.924	788.29	300.647	1172.67	874.964	621.415	512.808	871.62	444.352	833.94	509.599
CLASP1	Isoform of Q7Z460, Isoform 4 of CLIP-associating protein 1	254.346	10.8876	7.59477	20.9828	11.8029	5.7488	11.7974	16.6911	6.31766	10.8612	37.8957	8.44465	8.18002	9.08714	9.90665	8.01558	9.23482
CLASP2	Isoform of O75122, Isoform 3 of CLIP-associating protein 2	10.9478	10.9152	7.34708	11.694	9.3905	8.6572	11.0252	11.4153	5.16364	11.1091	23.3233	6.43401	3.66821	7.07176	3.99417	20.4755	2.22499
CLCC1	Chloride channel CLIC-like protein 1	0	0	0	51.0228	12.462	9.88046	0	0	0	13.7113	0	9.88284	0	0	0	0	0
CLEC14A	C-type lectin domain family 14 member A	0	0	0	0	0	2.15763	0	0	0	0	0	0	0	0	0	0	0
CLEC3B	Tetranectin	0	2.225	0	0	0	0	0	0	0	0	0	0	1.76098	0	0	1.27243	2.08751
CLIC1	Chloride intracellular channel protein 1	22.9364	0	0	0	0	0	0	0	0	0	0	0	0	0	0	2.16488	0
CLIC5	Chloride intracellular channel protein 5	126.568	10.1866	11.0692	24.7836	22.2428	13.6012	5.94956	11.7459	17.5572	18.9923	28.4833	5.95912	14.9884	24.6166	8.72623	28.3619	7.50288
CLIC6	Chloride intracellular channel protein 6;Isoform of Q96NY7, Isoform A of Chloride intracellular channel protein 6	0	0	0	3.1043	0	0	0	0	0	3.59151	4.4156	1.73373	0	0	0	0	0
CLINT1	Isoform of Q14677, Isoform 3 of Clathrin interactor 1	17.9195	6.27236	0	33.9519	0	0	24.705	24.9566	0	20.8534	44.8322	15.9802	0	28.7559	0	0	2.67503
CLIP1	CAP-Gly domain-containing linker protein 1	21.5837	8.77871	27.7533	21.2014	7.26422	6.78543	4.32897	9.4251	0	2.036	0	3.90465	7.49643	7.01015	8.03575	9.72377	2.9966
CLNS1A	Methylosome subunit pICln	0	5.37565	0	0	0	0	0	0	0	0	0	0	5.41819	0	0	0	0
CLPB	Isoform of Q9H078, Isoform 2 of Caseinolytic peptidase B protein homolog	0	8.1495	0	0	7.38055	3.17671	0	0	0	5.18415	0	2.77193	13.5974	0	5.32509	27.7354	8.82527
CLPP	ATP-dependent Clp protease proteolytic subunit, mitochondrial	24.7643	12.0679	0	0	0	51.4254	0	0	0	20.748	0	0	7.13107	0	1.23745	0	19.0734
CLPTM1	Putative lipid scramblase CLPTM1	66.8229	0	3.25923	8.94467	0	0	0	0	0	0	0	33.395	0	0	0	0	0
CLPTM1L	Lipid scramblase CLPTM1L;Isoform of Q96KA5, Isoform 2 of Lipid scramblase CLPTM1L	0	5.29457	0	20.5241	0	0	0	0	0	0	37.0758	16.0281	0	20.4704	0	0	0
CLPX	ATP-dependent Clp protease ATP-binding subunit clpX-like, mitochondrial	0	0.789825	12.4398	0	0	0	4.57388	4.46978	0	1.89355	3.30743	4.17524	5.30584	4.50637	0	5.31049	0
CLSTN1	Isoform of O94985, Isoform 2 of Calsyntenin-1	3.72757	0	0	0	0	0	0	0	0	0	0	0	0	0	0	0	0
CLTA	Isoform of P09496, Isoform Non-brain of Clathrin light chain A	0	0	0	0	0	0	0	0	13.1812	0	0	0	0	0	0	2.30269	3.20353
CLTB	Isoform of P09497, Isoform Non-brain of Clathrin light chain B	0	6.87276	0	0	4.72703	5.33921	0	0	2.42357	0	0	0	7.64636	0	6.86952	13.5811	0
CLTC	Clathrin heavy chain 1;Isoform of Q00610, Isoform 2 of Clathrin heavy chain 1	57.4282	86.0857	52.6762	31.6347	48.9315	47.6077	24.0816	40.8306	31.3297	32.209	43.5402	29.9283	75.3624	29.0086	52.3994	91.7561	106.544
CLTCL1	Clathrin heavy chain 2	0	0	0	0	2.86542	2.0164	0	0	0	0	0	0	0	0	2.05318	4.48162	0
CLU	Clusterin;Isoform of P10909, Isoform 2 of Clusterin;Isoform of P10909, Isoform 4 of Clusterin;Isoform of P10909, Isoform 5 of Clusterin;Isoform of P10909, Isoform 6 of Clusterin	74.6492	6.77534	7.69156	13.3957	2.40043	2.46818	14.6887	16.3789	5.22464	11.6139	24.3159	10.2325	4.17498	4.00984	3.97307	7.33559	5.29698
CLUH	Clustered mitochondria protein homolog	6.02179	5.90787	13.6967	6.60487	3.54396	2.12999	0	0	0	3.43066	0	6.57176	2.22718	0	2.2523	4.69067	2.60993
CMA1	Chymase	39.4299	91.3547	96.4083	70.9846	218.167	146.919	72.441	126.586	128.161	327.55	97.3397	137.272	355.267	37.1046	92.0082	288.028	277.989
CMAS	N-acylneuraminate cytidylyltransferase	18.1103	10.5909	14.4117	8.78141	7.72661	7.96484	0	15.7792	7.32582	16.6985	14.5912	16.741	8.73282	20.1942	8.08773	17.7311	12.4259
CMBL	Carboxymethylenebutenolidase homolog	77.8082	133.761	119.816	153.555	105.728	87.5543	115.155	151.177	62.2954	166.793	113.211	187.405	161.53	211.654	61.1683	99.2738	86.0257
CMC1	COX assembly mitochondrial protein homolog	0	8.99355	0	0	12.1784	0	0	0	12.0686	19.8416	0	0	10.7908	0	33.5449	51.527	4.98687
CMC2	COX assembly mitochondrial protein 2 homolog	0	5.64717	0	0	3.78433	0	0	0	0	3.50895	0	0	8.50853	0	5.35336	6.21777	6.59065
CMPK1	UMP-CMP kinase;Isoform of P30085, Isoform 3 of UMP-CMP kinase	0	3.35066	0	46.0961	0	0	0	8.60371	0	0	0	3.96535	0	5.16687	0	19.7895	21.6735
CMTR1	Cap-specific mRNA (nucleoside-2'-O-)-methyltransferase 1	0	1.17633	3.07691	0	1.42459	1.3022	0	0	1.56263	0	0	0	0	5.04228	0	8.4282	1.93254
CMYA5	Cardiomyopathy-associated protein 5	121.878	17.4715	46.8074	73.2427	14.474	15.4056	36.8031	39.6722	15.6335	23.1248	67.5601	18.3097	16.2463	34.271	15.1017	21.5494	17.7063
CNBP	CCHC-type zinc finger nucleic acid binding protein;Isoform of P62633, Isoform 2 of CCHC-type zinc finger nucleic acid binding protein	8.62036	15.6506	10.6222	0	2.94502	7.34814	0	0	0	6.05448	0	10.8039	2.93194	0	3.35449	6.14518	6.10419
CNBP	Isoform of P62633, Isoform 4 of CCHC-type zinc finger nucleic acid binding protein;Isoform of P62633, Isoform 8 of CCHC-type zinc finger nucleic acid binding protein	0	1.45389	0	0	0	0	0	0	0	0	0	0	0	0	0	0	0
CNDP2	Cytosolic non-specific dipeptidase	0	13.407	8.99735	13.407	5.98948	5.12127	0	0	0	0	0	3.38129	9.61069	0	2.83418	9.68355	0
CNEP1R1	Nuclear envelope phosphatase-regulatory subunit 1;Isoform of Q8N9A8, Isoform 2 of Nuclear envelope phosphatase-regulatory subunit 1	0	0	2.13115	13.2728	0	0	6.17283	7.75864	0.989136	4.56854	37.9044	0	0	7.59849	0	0	0
CNIH4	Protein cornichon homolog 4	43.0552	23.5413	28.0553	50.3691	3.54233	6.52946	30.5833	40.0392	6.01528	24.433	34.7608	20.844	8.27474	32.3465	8.82728	14.3594	10.82
CNKSR1	Connector enhancer of kinase suppressor of ras 1;Isoform of Q969H4, Isoform 2 of Connector enhancer of kinase suppressor of ras 1	2.92365	0	0	0	0	0	0	0	0	0	0	0	0	0	0	0	0
CNN1	Calponin-1	0	33.0774	33.0774	33.0774	0	8.56204	0	0	0	30.2536	0	9.78773	0	0	4.95709	14.8366	62.9112
CNN3	Isoform of Q15417, Isoform 3 of Calponin-3	0	0	0	0	0	0	0	0	0	0	31.2457	0	0	0	0	0	0
CNOT3	CCR4-NOT transcription complex subunit 3	0	0	0	0	0	0	18.8185	0	0	0	0	0	0	0	0	0	2.79916
CNP	2',3'-cyclic-nucleotide 3'-phosphodiesterase;Isoform of P09543, Isoform CNPI of 2',3'-cyclic-nucleotide 3'-phosphodiesterase	3.32143	5.19315	2.66633	2.74957	0	3.28456	0	0	0	0	0	2.41759	5.67616	0	1.77348	13.9745	6.64551
CNPY2	Protein canopy homolog 2	0	2.34764	2.34764	2.34764	0	0	0	0	0	0	0	0	0	0	0	0	1.60483
CNRIP1	CB1 cannabinoid receptor-interacting protein 1	0	10.5446	0	0	11.2406	0	0	0	5.05657	0	0	0	15.1375	0	11.5459	26.6707	10.1468
CNST	Consortin	0	0.971473	126.216	0.916145	0	0	0	0	0	0	0	0	4.21652	140.776	0	0	0
CNTFR	Ciliary neurotrophic factor receptor subunit alpha	0	1.04335	1.04335	1.04335	0	0	0	0	0	0	0	0	0	0	0	0	0
COA1	Cytochrome c oxidase assembly factor 1 homolog	26.7439	1.21543	0	34.7188	0	1.13052	0	15.9803	0	5.28053	0	5.17704	0	0	0	0	0
COA3	Cytochrome c oxidase assembly factor 3 homolog, mitochondrial	93.6107	19.5313	40.7582	58.8524	3.41734	2.24946	22.2323	78.2863	4.73212	62.5716	52.4916	28.3062	4.98258	57.9598	13.9196	10.7136	3.51017
COA5	Cytochrome c oxidase assembly factor 5	10.4936	18.3118	16.94	3.76846	30.06	41.4932	0	10.3439	9.05433	72.9419	0	8.51103	20.9293	6.5272	21.0536	0	9.14173
COA6	Cytochrome c oxidase assembly factor 6 homolog;Isoform of Q5JTJ3, Isoform 2 of Cytochrome c oxidase assembly factor 6 homolog;Isoform of Q5JTJ3, Isoform 3 of Cytochrome c oxidase assembly	0	0	0	0	0	2.96127	0	0	0	0	0	0	0	0	0	0	0
COA7	Cytochrome c oxidase assembly factor 7	0	2.16188	2.16188	2.16188	1.5527	0	0	0	3.35317	0	0	0	1.79289	0	2.70599	0	5.07024
COASY	Bifunctional coenzyme A synthase;Isoform of Q13057, Isoform 2 of Bifunctional coenzyme A synthase	0	6.56192	95.855	150.926	1.66836	42.1286	88.2439	117.189	0	61.6705	0	86.334	2.5151	86.1444	94.6949	4.60399	1.27564
COBL	Isoform of O75128, Isoform 5 of Protein cordon-bleu	76.3529	89.9976	94.4745	49.2226	174.578	135.262	67.5437	82.7534	86.1502	63.8965	34.7368	93.666	160.16	84.1254	151.331	503.193	115.061
COBL	Isoform of O75128, Protein cordon-bleu	0.97797	1.57228	1.57228	1.57228	1.19203	0	0	0	1.63854	0	0	0	3.55267	3.82761	3.10189	0	4.27492
COG4	Conserved oligomeric Golgi complex subunit 4	8.4455	0	0	0	0	0	0	0	0	0	0	0	0	0	0	0	0
COIL	Coilin	0	0	0	0	4.77847	2.87063	0	0	2.163	2.14722	0	0	6.85574	0	5.06905	13.438	1.2564
COL12A1	Collagen alpha-1(XII) chain	0	0	0	0	0	0	0	5.75024	0	0	0	0	0	0	0	0	0
COL13A1	Collagen alpha-1(XIII) chain;Isoform of Q5TAT6, Isoform 10 of Collagen alpha-1(XIII) chain;Isoform of Q5TAT6, Isoform 2 of Collagen alpha-1(XIII) chain;Isoform of Q5TAT6, Isofo	0	0	0	0	0	9.09656	0	0	0	0	0	0	0	0	0	0	0
COL14A1	Collagen alpha-1(XIV) chain	0	5.75746	0	12.731	0	0	0	0	0	0	20.72	0	0	4.95481	0	7.49091	17.9982
COL15A1	Collagen alpha-1(XV) chain	257.291	9.0935	59.733	81.6515	11.7595	18.9923	93.5157	96.7132	8.55374	38.6525	146.923	93.0426	11.1752	64.2728	4.57748	19.7986	5.83483
COL18A1	Collagen alpha-1(XVIII) chain	73.625	6.67008	21.8532	43.0392	5.00252	5.58184	35.3008	37.7299	5.81777	17.3052	79.8344	20.9403	7.98279	38.1792	5.40041	15.5358	9.04958
COL1A1	Collagen alpha-1(I) chain	3587.78	153.225	1737.06	2136.31	186.719	188.355	1555.19	2173.13	111.111	902.77	7657.55	1737.73	191.67	2396.77	62.2912	271.603	129.816
COL1A2	Collagen alpha-2(I) chain	908.501	56.628	754.77	1268.13	62.7608	71.4295	724.244	951.888	49.849	366.587	3790.44	794.844	84.4996	937.621	25.8778	111.541	54.68
COL24A1	Collagen alpha-1(XXIV) chain	0	1.94147	1.94147	1.94147	0.521782	0	0	0	0	0	0	0	0	0	0	0	0
COL3A1	Collagen alpha-1(III) chain	3840.83	23.0479	200.269	70.8213	43.7712	42.6754	142.064	63.8684	12.1466	39.3529	98.1726	258.87	31.7143	153.365	8.43192	30.3204	9.96158
COL4A1	Collagen alpha-1(IV) chain	12053.8	54.4165	908.269	639.093	148.487	122.286	1029.4	935.375	58.4462	625.86	1219.8	747.622	88.6246	1011.88	20.9328	177.147	13.0145
COL4A2	Collagen alpha-2(IV) chain	320.572	38.0917	597.468	640.419	92.2335	89.5112	650.107	680.59	37.2783	414.264	1131.33	457.385	55.7769	707.664	17.4995	113.406	5.39919
COL4A3	Collagen alpha-3(IV) chain	0	33.8712	520.014	355.275	87.5163	81.2414	577.41	535.409	0	320.389	811.503	388.492	59.2727	557.991	15.2239	107.606	4.76681
COL5A1	Collagen alpha-1(V) chain;Isoform of P20908, Isoform 2 of Collagen alpha-1(V) chain	0	0	5.55411	13.0216	0	0	7.84846	5.82218	0	6.6325	22.4849	7.07265	0	8.89667	0	0	0
COL5A2	Collagen alpha-2(V) chain	153.577	7.40339	56.6519	84.1907	7.23084	6.21695	64.7716	74.1115	4.83789	29.7219	185.05	44.1044	10.4413	63.6982	4.46094	11.2133	8.37005
COL5A3	Collagen alpha-3(V) chain	64.169	12.7447	131.224	175.576	17.254	22.4118	126.236	163.375	13.6665	95.4723	439.026	126.877	15.8509	124.488	9.01627	23.5361	0
COL6A1	Collagen alpha-1(VI) chain	1598.91	26.6275	407.957	449.432	51.2494	64.9647	615.58	866.734	37.7273	410.088	670.795	618.275	46.9304	753.403	28.3483	87.0232	20.1664
COL6A2	Collagen alpha-2(VI) chain	1653.58	39.204	468.829	420.595	81.8444	98.4866	740.431	1017.39	57.5117	507.081	920.853	760.645	62.2808	907.877	37.0789	139.616	26.9791
COL6A3	Collagen alpha-3(VI) chain	505.039	51.16	553.879	747.247	76.9465	115.392	825.248	1104.3	62.2238	514.846	1378.76	928.714	74.6714	1063.47	39.0505	141.07	35.631
COL6A3	Isoform of P12111, Isoform 4 of Collagen alpha-3(VI) chain	47.8217	11.2132	40.1804	54.9369	8.61765	7.85375	50.476	53.9493	7.35625	31.0583	93.9918	26.2109	8.41888	81.9082	0	0	0
COL6A6	Collagen alpha-6(VI) chain	5.13246	0	3.10038	8.11454	0	0	8.29439	3.07741	0	0	4.05873	1.97507	0	5.40415	0	0	0
COMMD1	COMM domain-containing protein 1	0	0	0	0	0	0	0	0	0	0	0	2.07005	0	0	0	5.46682	0
COMMD10	COMM domain-containing protein 10	0	1.88075	0	0	0	0	0	0	3.32549	0	0	0	0	0	0.779698	0	0
COMMD3	COMM domain-containing protein 3	0	0	0	0	7.62059	3.25445	0	0	0	0	0	4.63534	2.36132	0	0	4.17671	0
COMMD6	COMM domain-containing protein 6	0	0	0	0	0.66495	0	0	0	0	0	0	0	0	0	0.788364	0	0
COMMD7	COMM domain-containing protein 7;Isoform of Q86VX2, Isoform 2 of COMM domain-containing protein 7	0	0	0	0	0	0	0	0	0	0	0	0	0	0	0	9.03098	0
COMP	Cartilage oligomeric matrix protein	0	0	0	0	0	0	0	4.84379	0	0	0	0	0	0	0	0	0
COMT	Catechol O-methyltransferase;Isoform of P21964, Isoform Soluble of Catechol O-methyltransferase	23.8027	21.7486	22.9887	40.3984	8.42537	5.88542	0	9.95144	3.04689	15.5517	82.8495	9.32571	8.94653	11.4902	3.24285	10.7953	9.1144
COMTD1	Catechol O-methyltransferase domain-containing protein 1	23.7315	5.95705	10.1022	29.769	10.7322	5.95631	25.3679	51.5212	7.3732	51.248	64.9367	22.5207	0	50.249	4.44249	37.0199	6.43915
CONHIT000292931	CONHIT000292931	27.0349	362.937	238.844	324.911	0	51.949	159.179	174.617	0	115.499	141.478	288.126	21.1619	118.967	0	0	158.792
CONKRT10;KRT10	CONP13645;Keratin, type I cytoskeletal 10	85.158	6.3978	279.779	40.9415	5.71859	29.7083	34.4814	11.5927	19.7632	51.2126	46.7402	98.6011	18.6833	22.3732	10.6225	6.97806	16.4296
CONKRT14;KRT14	CONP02533;Keratin, type I cytoskeletal 14	12.9011	0	46.2503	46.2503	0	0	31.1161	0	0	4.36091	140.926	39.1726	0	4.58593	0	31.0409	0
CONKRT15	CONP19012	0	0	15.8312	15.8312	0	0	0	0	0	0	0	0	0	0	0	0	0
CONP00761	CONP00761	656.184	51207.2	18595.8	5154.23	64444.9	71495.3	29695.1	15313.9	68007.4	12490.4	7457.45	26716.6	79791.1	9943.22	76142.4	110061	58590.6
CONP15636	CONP15636	9315.91	15382.6	8634.05	3257.35	18573.3	43800.3	22453.5	10863.9	23305.4	8342.13	6241.52	17802.5	35756.5	4818.67	33560.4	35484.2	33016.3
CONQ92764;KRT35	CONQ92764;Keratin, type I cuticular Ha5	0	0	0	0	0	0	0	0	0	0	5.3075	0	0	0	0	0	0
COPA	Coatomer subunit alpha	49.2635	43.5944	37.6803	48.5137	18.9709	24.3488	30.0113	15.613	16.3364	46.642	43.6204	40.6988	29.4344	55.0969	14.2799	60.3719	35.5982
COPB1	Coatomer subunit beta	0	5.46677	6.13359	0	3.06682	2.83451	0	0	0	0	0	5.64783	0	5.48185	2.13367	6.74272	3.80564
COPB2	Coatomer subunit beta';Isoform of P35606, Isoform 2 of Coatomer subunit beta'	0	18.8335	17.3426	0	11.2535	16.9308	0	0	0	7.03521	0	0	11.7721	0	10.6937	19.6397	11.9242
COPE	Coatomer subunit epsilon	186.091	35.5493	1530.08	822.553	901.548	790.273	630.79	1201.95	556.36	308.09	290.062	822.587	724.027	845.332	669.155	25.3416	192.056
COPG1	Coatomer subunit gamma-1	47.6459	6.55739	0	14.5333	11.4522	9.00694	4.57809	4.49248	1.54937	3.31571	7.46088	5.41355	8.11623	0	3.66038	5.8862	6.35665
COPG2	Coatomer subunit gamma-2	0	2.88689	0	0	2.82676	3.22981	0	3.05131	0	0	5.30139	0	0	21.322	0	8.90707	1.48603
COPS2	COP9 signalosome complex subunit 2	21.6683	23.8743	29.9788	30.8862	18.6719	17.627	9.53421	17.5584	7.91874	24.4499	10.7768	15.3986	22.3385	15.0878	9.53733	18.3415	8.45723
COPS3	COP9 signalosome complex subunit 3	83.7964	14.3196	0	23.2361	23.664	17.554	0	0	9.41578	8.56993	0	5.74754	28.1355	0	9.72359	25.295	2.57768
COPS4	COP9 signalosome complex subunit 4	13.4037	10.0747	15.0596	19.7362	13.295	9.78312	0	12.3819	4.32968	18.3222	14.4541	10.3701	15.2917	6.60279	3.94028	12.6484	2.54524
COPS5	COP9 signalosome complex subunit 5	33.46	32.3915	35.7532	38.0596	20.0812	19.4481	14.0309	20.6341	7.10651	24.7501	8.91025	20.8921	25.8675	16.063	10.5737	18.5112	11.4032
COPS6	COP9 signalosome complex subunit 6	0	42.9864	48.4523	37.8498	44.1559	21.0998	0	19.8649	15.2285	26.1624	33.2959	24.739	46.6933	0	14.5421	24.0622	15.4535
COPS7A	COP9 signalosome complex subunit 7a	15.8061	18.9903	21.053	24.647	11.0864	7.34476	8.91014	20.2482	2.90641	16.3184	10.2823	8.20695	12.3525	11.5592	5.79331	10.8077	7.04414
COPS7B	COP9 signalosome complex subunit 7b	0	11.2236	0	0	10.5072	0	0	0	12.5388	33.3716	0	0	0	50.4112	10.6519	17.6009	9.127
COPS8	COP9 signalosome complex subunit 8	20.7456	15.1332	10.0836	27.2373	53.8256	39.8178	0	0	22.2257	18.05	0	361.228	53.4508	0	30.1388	56.4722	0
COPZ1	Coatomer subunit zeta-1;Isoform of P61923, Isoform 4 of Coatomer subunit zeta-1	0	0	0	0	0	0	0	0	0	0	0	0	2.26389	0	0	0	0
COPZ2	Coatomer subunit zeta-2	0	60.011	0	0	0	0	0	0	0	0	0	0	0	0	0	0	0
COQ10A	Coenzyme Q-binding protein COQ10 homolog A, mitochondrial;Isoform of Q96MF6, Isoform 2 of Coenzyme Q-binding protein COQ10 homolog A, mitochondrial;Isoform of Q96MF6, Isoform 3 of Coenz	0	0	0	0	0	59.3304	0	0	0	0	0	0	0	0	0	0	0
COQ10B	Coenzyme Q-binding protein COQ10 homolog B, mitochondrial;Isoform of Q9H8M1, Isoform 2 of Coenzyme Q-binding protein COQ10 homolog B, mitochondrial	11.1436	10.0192	0	31.1074	0	0	13.1185	0	0	37.5212	69.8377	24.015	11.1187	37.0192	11.993	14.7515	13.6247
COQ3	Ubiquinone biosynthesis O-methyltransferase, mitochondrial	101.327	32.4961	12.4771	18.6967	8.3002	4.71495	0	5.97291	1.5183	2.36852	0	2.38277	17.9703	0	5.07022	8.3644	11.9214
COQ5	2-methoxy-6-polyprenyl-1,4-benzoquinol methylase, mitochondrial	24.5938	45.9125	27.0032	32.5585	33.6271	11.313	10.6754	15.1212	7.93334	16.3635	32.5679	9.6846	43.207	11.6045	19.2764	24.4419	17.3952
COQ6	Ubiquinone biosynthesis monooxygenase COQ6, mitochondrial;Isoform of Q9Y2Z9, Isoform 3 of Ubiquinone biosynthesis monooxygenase COQ6, mitochondrial	0	40.8066	15.9593	0	18.7711	10.7319	0	0	5.70895	8.48159	0	0	51.7672	0	9.27314	17.0269	12.3603
COQ7	5-demethoxyubiquinone hydroxylase, mitochondrial	24.402	17.4715	22.8042	29.4147	8.71543	2.53325	11.6114	10.7593	3.07154	24.0092	26.2295	10.4902	15.3304	8.54923	4.33538	6.59834	9.89528
COQ8A	Atypical kinase COQ8A, mitochondrial	152.414	209.378	211.064	230.709	168.534	136.734	111.067	196.33	73.766	231.567	267.726	127.962	179.124	123.176	175.803	168.552	166.275
COQ9	Ubiquinone biosynthesis protein COQ9, mitochondrial	39.0414	127.242	69.9382	85.2244	63.473	48.8065	21.4726	31.2238	29.8714	60.1696	26.3688	25.3502	311.067	40.8815	48.5989	81.0279	36.6968
CORO1B	Coronin-1B	6.91075	7.90371	0	1.88653	4.23437	0	7.02562	4.12939	2.2022	7.98504	0	12.1642	3.36089	13.3945	4.88232	13.5842	30.7417
CORO1C	Coronin-1C;Isoform of Q9ULV4, Isoform 2 of Coronin-1C;Isoform of Q9ULV4, Isoform 3 of Coronin-1C	19.0865	25.011	31.5366	6.52626	10.4662	10.7023	13.6485	13.3378	7.73493	31.8623	0	37.5908	15.637	37.6814	13.5746	35.3863	71.0278
CORO6	Isoform of Q6QEF8, Isoform 3 of Coronin-6;Isoform of Q6QEF8, Isoform 4 of Coronin-6	72.6985	52.2073	122.409	44.1432	26.6188	36.7517	45.2882	86.494	39.9352	86.7515	38.5026	82.867	25.951	59.2417	37.5255	75.151	73.6085
CORO6	Isoform of Q6QEF8, Isoform 5 of Coronin-6	437.245	446.201	718.811	273.441	220.236	225.672	282.478	309.946	177.605	385.813	196.241	461.83	195.774	433.438	260.571	402.101	404.416
CORO7	Isoform of P57737, Isoform 3 of Coronin-7	40.628	0	25.8056	26.7217	0	0	0	35.1954	10.2602	14.5404	0	0	13.8088	30.0142	13.653	11.4877	13.5871
COX11	Cytochrome c oxidase assembly protein COX11, mitochondrial	16.0334	6.7349	0	18.162	3.98831	3.57007	6.5401	12.0805	2.46239	10.1316	21.5571	6.55514	4.85685	12.1235	5.14786	8.76667	4.86775
COX14	Cytochrome c oxidase assembly protein COX14	19.8301	4.82648	12.0147	18.0911	0	3.57419	0	19.6692	0	31.4541	0	9.04444	4.28011	9.09551	8.68214	7.12582	0
COX15	Isoform of Q7KZN9, Isoform 2 of Cytochrome c oxidase assembly protein COX15 homolog	27.8628	0	7.43558	33.8816	0	0	13.9857	15.1945	0	15.3277	0	0	0	0	0	0	0
COX17	Cytochrome c oxidase copper chaperone	11.195	2.96231	13.4715	13.4606	4.8127	3.79995	9.98814	11.0481	3.25429	9.2465	0	9.52976	3.40686	15.9304	2.39126	11.085	0
COX20	Cytochrome c oxidase assembly protein COX20, mitochondrial;Isoform of Q5RI15, Isoform 2 of Cytochrome c oxidase assembly protein COX20, mitochondrial	19.3787	8.38554	29.3775	26.6848	0	0	11.5315	34.3389	0	23.718	31.9735	19.5967	0	14.9048	0	4.82208	9.1186
COX4I1	Cytochrome c oxidase subunit 4 isoform 1, mitochondrial	1957.16	707.833	2727.19	4422.46	494.753	458.963	2944.32	4452.31	516.84	5276.88	6541.69	1824.24	368.854	5118.32	501.911	739.324	632.599
COX5A	Cytochrome c oxidase subunit 5A, mitochondrial	1785.36	246.394	1165.77	1885.23	350.017	300.523	2210.98	3011.52	310.568	2737.65	3864.47	1688.43	334.237	2802.38	328.342	114.613	178.537
COX5B	Cytochrome c oxidase subunit 5B, mitochondrial	1460.58	249.362	1053.94	1305.46	261.029	167.872	1411.51	1951.58	258.914	1776.55	1897.97	995.135	171.615	2029.21	165.931	591.745	89.5423
COX6B1	Cytochrome c oxidase subunit 6B1	201.338	146.7	226.211	277.565	126.733	80.1452	98.5564	167.836	110.371	326.42	297.708	98.533	182.791	174.875	166.697	103.213	199.999
COX6C	Cytochrome c oxidase subunit 6C	3446.87	374.051	1627.1	2676.48	353.255	319.358	1652.28	3163.63	388.916	4014.92	4308.14	1056.53	228.905	3576.24	367.982	574.427	453.658
COX7A1	Cytochrome c oxidase subunit 7A1, mitochondrial	554.914	1013.98	983.138	1270.18	424.902	318.697	901.539	1326.13	247.432	1076.9	1272.3	668.778	430.779	1213.19	342.316	733.39	497.197
COX7A2	Cytochrome c oxidase subunit 7A2, mitochondrial	87.0012	54.179	55.5155	71.181	35.9823	41.8868	47.6195	83.596	21.5852	107.171	62.1284	53.4419	40.351	56.745	37.1301	96.4794	66.0128
COX7A2L	Cytochrome c oxidase subunit 7A-related protein, mitochondrial	46.1557	122.499	31.2618	76.3949	0	0	20.1969	48.5273	0	25.9703	104.952	12.3334	0	44.3841	0	20.7986	0
COX7B	Cytochrome c oxidase subunit 7B, mitochondrial	105.081	17.5886	62.9527	107.069	6.25157	11.5472	90.5075	141.836	9.53139	65.4753	194.084	31.3893	11.315	161.334	8.56104	22.451	18.8681
COX7C	Cytochrome c oxidase subunit 7C, mitochondrial	953.071	509.484	1730.27	801.427	254.266	281.434	2063.88	1957.88	422.918	3814.85	3193.67	1547.68	273.435	2412.83	439.467	751.51	405.722
COX8A	Cytochrome c oxidase subunit 8A, mitochondrial	187.64	28.5845	101.022	165.678	10.2633	15.0965	175.099	235.443	14.8032	156.415	367.105	75.2457	31.344	252.422	19.73	40.3492	44.9706
CP	Ceruloplasmin	0	0	0	0	3.3946	0	28.4043	6.53861	0	5.01161	61.8429	0	2.92519	0	4.14407	0	3.98408
CPA3	Mast cell carboxypeptidase A	69.1234	143.758	145.584	65.6242	161.953	203.506	82.07	110.404	218.452	356.761	70.2733	140.308	326.403	56.2377	107.159	138.209	185.793
CPEB3	Cytoplasmic polyadenylation element-binding protein 3;Isoform of Q8NE35, Isoform 2 of Cytoplasmic polyadenylation element-binding protein 3	0	0	0	0	0	0	0	0	0	4.75529	0	0	0	0	0	0.805443	0
CPEB4	Cytoplasmic polyadenylation element-binding protein 4;Isoform of Q17RY0, Isoform 2 of Cytoplasmic polyadenylation element-binding protein 4	0	1.2426	0	0	2.40375	1.6534	0	0	1.44829	0	0	0	2.21899	3.69937	0.720986	2.96848	1.57445
CPN1	Carboxypeptidase N catalytic chain	0	0	0	0	0	0	20.1226	0	0	0	18.6119	0	0	0	0	0	0
CPNE1	Copine-1	0	0.971921	0	0	0	0	0	0	0	0	0	0	1.83804	0	0	0	2.58421
CPNE3	Copine-3	33.7696	13.8781	21.5533	53.6864	15.5521	14.7257	31.9584	35.3741	16.1457	19.7869	47.1184	27.6746	15.6984	34.636	21.4253	73.5419	24.9246
CPPED1	Serine/threonine-protein phosphatase CPPED1	0	0	0	35.552	0	0	37.0582	0	0	0	0	33.6343	0	0	0	0	0
CPSF2	Cleavage and polyadenylation specificity factor subunit 2	0	0	0	0	0	0	0	0	0	0	0	0	0.314018	0	0	0	3.48761
CPSF3	Cleavage and polyadenylation specificity factor subunit 3	0	0	0	0	0	0	0	0	0	0	0	0	1.02578	0	0	0	0
CPSF6	Isoform of Q16630, Isoform 2 of Cleavage and polyadenylation specificity factor subunit 6	19.8896	28.2768	29.3302	0	6.4534	16.5835	5.39492	19.5878	7.22032	24.5571	0	17.9425	7.8642	0	9.76398	0	13.3146
CPT1A	Carnitine O-palmitoyltransferase 1, liver isoform	5.28841	0	0	0	0	0	0	0	0	4.67172	0	0	0	7.28161	0	0	0
CPT1B	Carnitine O-palmitoyltransferase 1, muscle isoform	131.409	54.9707	148.12	180.37	39.8647	26.0422	102.822	268.217	32.4456	95.0117	171.076	62.7165	17.7809	198.256	39.2669	46.0718	55.097
CPT2	Carnitine O-palmitoyltransferase 2, mitochondrial	18.7683	14.3262	18.0059	23.3918	17.8932	11.7321	16.4697	22.12	5.25964	42.2646	28.3459	16.3977	31.4235	35.8531	10.333	25.6233	7.08318
CPTP	Ceramide-1-phosphate transfer protein	0	27.3798	0	0	15.406	0	0	0	11.5626	0	0	0	12.9585	0	17.6006	8.49444	14.6564
CPVL	Probable serine carboxypeptidase CPVL	0	0	0	0	0	0	0	0	0	0	0	0	0	0	0	0	4.84538
CRADD	Death domain-containing protein CRADD	0	0	0	0	0	0	0	0	0	0	0	0	0	0	23.6552	0	0
CRAT	Carnitine O-acetyltransferase;Isoform of P43155, Isoform 2 of Carnitine O-acetyltransferase	167.543	176.657	157.476	182.963	114.654	123.902	91.9358	189.533	91.6972	306.251	168.457	157.682	180.283	178.866	162.079	365.035	168.938
CRBN	Protein cereblon;Isoform of Q96SW2, Isoform 2 of Protein cereblon	0	1.52767	0	0	1.22177	1.78393	0	0	0	1.64959	0	7.42133	11.3228	0	0	0	0
CRELD1	Protein disulfide isomerase CRELD1	0	2.62924	2.62924	10.5018	0	0	0	0	0	0	0	0	0	0	0	0	0
CRIP1	Cysteine-rich protein 1	0	0	0	0	5.99776	0	0	0	0	0	0	0	0	0	0	22.42	0
CRIP2	Cysteine-rich protein 2	0	3.44692	3.85314	0	4.27158	3.04493	0	2.58992	4.38587	7.41271	0	2.9039	4.54103	0	4.67333	57.9609	13.4409
CRK	Adapter molecule crk	0	10.6888	10.6888	10.6888	0	0	0	0	0	0	0	0	0	0	0	0	0
CRLF1	Cytokine receptor-like factor 1	0	0	0	17.9955	0	0	0	15.3988	1.47828	13.902	0	4.85492	0	13.8206	0	0	0
CRP	C-reactive protein	0	0	24.7295	0	0	0	17.7372	0	0	3.36804	0	6.81996	0	46.798	0	0	0
CRY2	Isoform of Q49AN0, Isoform 2 of Cryptochrome-2	19.3966	0	16.3649	0	8.28111	0	13.9825	11.4864	0	0	8.51315	8.26194	0	0	0	8.56317	0
CRYAB	Alpha-crystallin B chain	999.368	872.431	1221.84	1099.67	404.379	457.064	462.471	577.013	98.9592	605.17	880.623	522.976	561.377	402.835	140.419	449.816	218.438
CRYL1	Lambda-crystallin homolog	0	0	0	90.3159	0	5.22008	0	0	0	0	0	0	0	0	0	0	0
CRYM	Ketimine reductase mu-crystallin	86.7412	0	568.087	0	0	30.2119	0	0	0	460.126	0	0	0	0	0	0	0
CRYZ	Quinone oxidoreductase	30.2639	16.5018	12.2184	19.8365	8.28493	11.4098	20.1783	37.6345	2.91042	10.7616	243.383	14.1443	13.1539	33.437	5.28721	14.0843	11.2831
CS	Citrate synthase, mitochondrial	365.869	683.96	416.883	425.759	459.292	492.467	211.147	289.059	352.822	296.126	344.659	390.915	446.74	167.235	710.275	651.681	735.577
CSDE1	Isoform of O75534, Isoform 4 of Cold shock domain-containing protein E1	64.9868	68.0661	64.791	32.4612	16.2214	16.3071	25.1585	45.3927	9.16972	20.1501	102.233	34.8563	19.9505	33.1381	9.89981	27.608	27.0351
CSE1L	Exportin-2;Isoform of P55060, Isoform 3 of Exportin-2	97.1685	33.0013	10.9854	117.021	12.5658	40.5207	2.9227	0	20.6803	0	0	4.46665	17.4524	0	24.4358	5.99839	10.6495
CSK	Tyrosine-protein kinase CSK	0	0	22.0199	67.6339	20.0488	17.3212	50.4063	79.3571	14.5833	59.2076	0	17.0719	7.55535	31.494	8.09332	12.8628	7.53058
CSNK1A1	Casein kinase I isoform alpha	13.3791	13.5685	6.37991	11.2762	7.77837	9.64445	8.24678	10.809	8.04926	9.31917	4.77738	8.52672	9.50943	6.78621	12.0622	1.12677	14.2242
CSNK1A1L	Casein kinase I isoform alpha-like	0	0	0	0	0	0	0	0	0	0	0	0	0	0	0	3.96949	0
CSNK1D	Casein kinase I isoform delta;Isoform of P48730, Isoform 2 of Casein kinase I isoform delta	10.81	9.06841	7.73775	0	7.00308	5.97417	0	7.32126	4.49424	6.67386	0	4.82705	0	0	4.61027	0	4.98687
CSNK2A1	Casein kinase II subunit alpha	19.3609	5.23035	10.5272	0	4.21686	3.13384	0	0	0	3.24846	0	5.86519	5.56486	0	1.90558	2.13567	0
CSNK2A2	Casein kinase II subunit alpha'	0	0	0	0	0	0	0	0	0	0	0	0	3.87039	0	0	6.09025	0
CSNK2B	Casein kinase II subunit beta	7.50456	9.69909	8.11175	4.63409	3.4347	2.86271	0	0	1.63741	6.4295	0	3.81225	9.21626	0	0	9.44789	2.71474
CSRP1	Cysteine and glycine-rich protein 1	29.9589	31.263	43.4525	8.09961	14.9344	24.6818	11.8327	21.5966	13.0754	38.0345	0	16.7951	19.8406	38.1353	25.9434	146.735	38.7283
CSRP3	Cysteine and glycine-rich protein 3	113.691	175.967	108.721	58.2726	86.9939	95.0774	50.9665	86.9733	78.8417	264.653	55.4869	67.4345	89.589	101.912	102.595	800.635	139.646
CST3	Cystatin-C	0	0	0	0	0	0	0	0	0	0	0	0	0	0	0	0	5.92691
CSTB	Cystatin-B	0	67.5353	0	0	0	0	0	0	0	0	0	0	0	0	0	0	0
CSTF2T	Cleavage stimulation factor subunit 2 tau variant	0	0	98.3365	0	0	0	0	0	0	7.17591	0	0	0	0	0	0	0
CTBP1	C-terminal-binding protein 1;Isoform of Q13363, Isoform 2 of C-terminal-binding protein 1	0	7.6266	0	0	2.95998	0	0	0	0	0	0	0	1.21131	0	0	5.09606	3.61433
CTCF	Transcriptional repressor CTCF	12.2638	10.1352	10.6369	16.3894	20.0673	10.992	0	23.3177	14.8681	15.2854	0	7.21077	21.9561	18.0687	11.0975	80.8974	7.63358
CTDNEP1	CTD nuclear envelope phosphatase 1	0	0	4.54061	15.9795	0	0	6.39123	7.83404	0	10.1433	18.6119	3.34489	0	12.5756	0	0	0
CTF1	Cardiotrophin-1	95.747	0	0	0	0	4.78605	9.02162	10.0992	1.81784	4.53813	0	4.75753	0	0	1.49461	0	4.07219
CTIF	Isoform of O43310, Isoform 2 of CBP80/20-dependent translation initiation factor	0	0	0	0	0	0.852663	0	0	0	0	0	0	0	0	0	0	0
CTNNA1	Catenin alpha-1	0	7.85653	0	0	7.3365	0	0	0	2.41577	0	0	0	5.80303	0	0	9.79118	6.81284
CTNNA3	Catenin alpha-3	0	0	0	0	1.11478	1.01036	0	0	0.97377	0	0	0	1.1718	0	0	2.32346	0
CTNNAL1	Alpha-catulin;Isoform of Q9UBT7, Isoform 2 of Alpha-catulin;Isoform of Q9UBT7, Isoform 3 of Alpha-catulin	0	0	0.848427	0	0	0	3.38442	0	0	0	0	0	0	0	0	0	0
CTNNB1	Catenin beta-1	0	6.39044	2.7297	0	0	5.66079	0	0	4.46844	0	0	0	6.72596	0	0	9.45442	9.85663
CTNNBL1	Beta-catenin-like protein 1;Isoform of Q8WYA6, Isoform 4 of Beta-catenin-like protein 1	0	2.60454	0	0	0.684367	0	0	0	0	0	0	1.69076	0	2.85185	0	1.8851	0
CTNND1	Isoform of O60716, Isoform 1AC of Catenin delta-1;Isoform of O60716, Isoform 1A of Catenin delta-1	0	4.95371	4.95371	12.0799	2.14827	0	0	0	6.12853	5.94398	0	0	2.38426	0	2.39677	5.66154	8.40095
CTPS1	CTP synthase 1	0	12.5844	22.7884	0	16.9742	0	0	0	0	18.3686	0	0	10.5525	0	31.1262	15.5537	15.6541
CTPS2	CTP synthase 2	0	0	0	0	0	0	0	0	0	0	0	0	0	14.2045	0	0	0
CTRL	Chymotrypsin-like protease CTRL-1	0	0	0	0	0	8.0478	0	0	7.262	0	0	0	0	0	7.87638	0	0
CTSB	Cathepsin B	0	20.8464	0	0	0	7.37186	0	0	3.60791	15.859	0	6.72949	10.8257	0	10.7951	36.5877	48.1757
CTSC	Dipeptidyl peptidase 1	0	2.8329	0	0	1.53034	0	0	0	0	0	0	2.48875	3.4774	0	0	0	2.49706
CTSD	Cathepsin D	45.9331	29.0891	25.0504	21.3631	15.1039	29.5513	15.1665	14.76	13.9591	28.1046	29.1266	38.4222	23.548	12.5698	16.475	56.7198	24.2174
CTSF	Cathepsin F	5.09713	1.14112	2.82432	5.41208	0.964692	1.02465	4.19358	3.35959	0	3.19358	6.05885	2.0276	1.44729	4.51157	0.854726	1.81859	0
CTSG	Cathepsin G	27.411	50.4117	24.161	59.4243	49.9676	49.3716	27.4653	107.693	78.4976	317.89	29.8188	210.854	220.27	91.7756	122.836	330.396	338.944
CTSZ	Cathepsin Z	0	0	0	0	0	0	0	0	0	6.59899	0	0	0	0	2.05933	4.85663	5.11244
CTTN	Src substrate cortactin	18.7252	15.1716	7.47162	0	7.19596	10.7023	0	10.8514	6.13841	10.2371	0	13.2703	10.4485	0	7.46838	22.7371	11.7065
CUEDC1	CUE domain-containing protein 1	0	0	405.616	576.188	244.056	0	0	564.918	0	0	0	0	0	0	335.758	0	0
CUEDC2	CUE domain-containing protein 2	0	0	28.7551	0	0	0	0	0	0	0	0	0	0	0	0	0	0
CUL1	Cullin-1	21.1702	18.3413	17.2351	23.4134	13.5515	13.1788	14.0729	19.7236	8.52621	8.85885	16.2177	22.7657	14.725	6.04543	10.0862	20.7031	14.3162
CUL2	Cullin-2;Isoform of Q13617, Isoform 2 of Cullin-2	36.9679	21.1169	52.543	49.3701	47.0207	37.0576	29.5382	35.5374	23.225	48.3256	17.7292	46.2255	48.6692	47.701	30.6145	31.9694	16.7621
CUL3	Cullin-3	6.96828	18.7254	28.7286	14.0723	31.966	32.4248	4.66106	12.5079	14.9919	14.4603	0	12.2993	25.2554	0	13.1228	35.1346	9.79103
CUL4A	Cullin-4A	23.896	20.6505	23.3622	20.458	7.83049	8.63132	13.5952	17.603	4.35267	13.8636	16.2664	17.3653	8.66472	12.7858	8.37002	12.5613	12.2413
CUL5	Cullin-5	27.348	17.5078	21.618	36.4304	39.4356	28.6865	13.7589	19.4799	19.0308	17.3371	24.9856	13.7177	29.7958	19.361	13.7476	30.0909	10.3354
CUL7	Cullin-7;Isoform of Q14999, Isoform 2 of Cullin-7	0	0	0	0	0	0	0	0	0	0	0	0	0	0	0	0	0.826472
CUSTOS	Protein CUSTOS	0	0	0	0	0	0	0	0	0	0	0	0	0	0	0	9.53531	0
CUTC	Copper homeostasis protein cutC homolog	15.8061	35.5739	9.04929	12.6696	40.3171	18.6371	13.3624	22.0539	24.8117	53.8862	15.9437	25.9109	21.605	15.9414	41.8337	23.9682	28.4465
CXXC1	CXXC-type zinc finger protein 1;Isoform of Q9P0U4, Isoform 2 of CXXC-type zinc finger protein 1	0	0	0	0	4.19555	0	0	0	0	0	0	0	5.79768	0	0	12.8924	0
CYB5A	Cytochrome b5;Isoform of P00167, Isoform 2 of Cytochrome b5	0	0	1.91873	15.9318	0	0	0	7.3061	0	0	0	0	0	0	0	2.2617	0
CYB5B	Cytochrome b5 type B	63.2158	13.5904	30.8827	98.8699	6.39866	4.36192	28.6144	64.7867	3.63376	26.271	63.3709	12.2937	8.18379	49.6166	4.12598	4.74717	7.50288
CYB5R1	NADH-cytochrome b5 reductase 1	1181.75	194.864	794.355	1373.61	233.932	245.402	1127.42	1679.14	247.318	1658.35	1629.63	792.468	190.746	1343.78	189.29	145.089	191.526
CYB5R3	NADH-cytochrome b5 reductase 3;Isoform of P00387, Isoform 2 of NADH-cytochrome b5 reductase 3;Isoform of P00387, Isoform 3 of NADH-cytochrome b5 reductase 3	5017.94	98.2949	321.895	458.104	70.6299	72.3398	206.246	491.797	50.2176	339.842	315.493	185.602	83.417	408.533	79.8411	92.6691	112.364
CYC1	Cytochrome c1, heme protein, mitochondrial	466.257	313.64	1568.25	2243.7	250.258	251.813	1323.38	3137.51	257.073	3097.97	2988.07	889.778	191.538	3114.06	314.36	388.092	407.594
CYCS	Cytochrome c	44.1088	47.7453	44.2094	29.6322	44.0138	62.6293	22.3401	43.8617	44.3768	177.042	51.9864	37.2633	53.9206	39.1316	75.5139	22.4096	51.5025
CYFIP1	Cytoplasmic FMR1-interacting protein 1	5.65751	4.13553	0	0	2.80213	3.75991	2.18366	0	4.57463	10.0827	0	13.387	6.64132	12.8833	4.15458	11.9326	9.58138
CYLD	Ubiquitin carboxyl-terminal hydrolase CYLD;Isoform of Q9NQC7, Isoform 2 of Ubiquitin carboxyl-terminal hydrolase CYLD	0	132.261	0	0	0	99.7648	0	0	127.425	0	0	0	117.207	0	0	0	0
CYP27A1	Sterol 26-hydroxylase, mitochondrial	0	2.36881	0	0	0	0	0	0	0	0	0	0	0	0	0	0	0
CYP2J2	Cytochrome P450 2J2	0	0	0	0	0	0	0	1.96827	0	0	0	0	0	0	0	0	1.17768
CYP2U1	Cytochrome P450 2U1	0	113.326	1233.15	1643.86	35.5458	63.3107	0	2403.73	56.5531	1562.35	2491.09	987.602	83.8599	1369.08	23.9291	124.576	60.1767
CYRIA	CYFIP-related Rac1 interactor A	0	0	0	0	0	0	0	0	0	0	0	0	0	0	3.24658	0	0
CYRIB	CYFIP-related Rac1 interactor B	0	7.91281	8.98286	0	9.48176	0	0	0	0	0	0	0	7.95893	0	18.0271	7.97691	4.27394
CYSTM1	Cysteine-rich and transmembrane domain-containing protein 1	0	39.0599	51.6791	0	0	0	0	76.9637	0	35.7913	0	0	0	0	0	0	0
CYTH1	Cytohesin-1;Isoform of Q15438, Isoform 2 of Cytohesin-1	0	0	0	0	1.67722	0	0	0	0	0	0	0	0	0	0	0	0
CZIB	CXXC motif containing zinc binding protein	0	0	0	0	0	0	0	0	0	0	0	0	1.33769	0	0	0	0
D2HGDH	D-2-hydroxyglutarate dehydrogenase, mitochondrial	0	3.065	402.916	0	1.96015	4.83034	0	0	0	3.71944	0	0	0	0	0	3.09838	2.52713
DAAM2	Disheveled-associated activator of morphogenesis 2;Isoform of Q86T65, Isoform 2 of Disheveled-associated activator of morphogenesis 2	0	0	0	0	0	0	0	0	0	0	0	0	0	0	0	1.86352	2.37098
DAD1	Dolichyl-diphosphooligosaccharide--protein glycosyltransferase subunit DAD1	16.1185	13.2444	18.3195	45.3173	9.76762	14.5037	26.8525	32.0174	12.4153	22.084	46.9883	15.2785	10.5161	25.6583	8.87415	15.3545	14.7376
DAG1	Dystroglycan 1	169.639	42.2018	154.424	178.47	22.6146	21.8362	199.795	245.689	20.2002	98.6909	256.325	158.665	16.1605	134.378	7.94926	37.225	15.1995
DAGLB	Diacylglycerol lipase-beta;Isoform of Q8NCG7, Isoform 4 of Diacylglycerol lipase-beta	0	0	0	0	0	0	0	0	0	0.630053	0	0	0	0	0	0	0
DAP3	28S ribosomal protein S29, mitochondrial;Isoform of P51398, Isoform 2 of 28S ribosomal protein S29, mitochondrial;Isoform of P51398, Isoform 3 of 28S ribosomal protein S29, mitochondrial	12.9725	6.71631	7.12713	11.7156	2.95521	3.59565	0	10.2161	1.95865	11.2584	0	5.33313	5.79101	11.4453	6.68539	10.8152	11.6984
DAPK2	Isoform of Q9UIK4, Isoform 2 of Death-associated protein kinase 2	0	0	0	0	0	13.1516	32.4104	0	0	0	30.4152	26.9701	8.14994	38.0126	6.56337	23.4982	16.3165
DARS1	Aspartate--tRNA ligase, cytoplasmic	32.5481	24.9937	34.6031	31.7588	21.11	19.5784	16.3074	26.9703	14.875	30.0592	30.817	30.5479	19.4247	29.2703	17.8948	36.0193	24.7987
DARS2	Aspartate--tRNA ligase, mitochondrial	13.0565	14.0227	21.4444	17.4769	9.16619	9.10494	0	13.6768	6.25974	22.2217	4.64505	15.6164	6.16105	16.6582	9.87249	16.2568	14.5925
DAZAP1	DAZ-associated protein 1;Isoform of Q96EP5, Isoform 2 of DAZ-associated protein 1	0	4.40383	4.40383	4.40383	3.05414	1.34362	0	0	0	0	0	0	0	0	0	0	0
DBN1	Drebrin;Isoform of Q16643, Isoform 3 of Drebrin	0	0	0	0	0	0	0	22.9978	0	13.5231	0	0	0	0	0	3.23247	1.09554
DBNL	Drebrin-like protein	125.813	84.1261	84.1261	84.1261	0	0	0	0	35.8638	43.1795	0	55.8447	0	0	22.3731	0	0
DBR1	Lariat debranching enzyme	0	7.90553	0	0	7.87207	13.9694	0	0	7.4603	0	0	0	0	0	16.0667	0	9.96846
DBT	Lipoamide acyltransferase component of branched-chain alpha-keto acid dehydrogenase complex, mitochondrial	23.6062	12.2837	20.7403	16.0311	9.12618	12.5192	8.59577	16.2999	7.49646	31.4903	24.7794	18.9314	8.26903	21.2191	7.85646	25.3358	15.3932
DCAF1	DDB1- and CUL4-associated factor 1;Isoform of Q9Y4B6, Isoform 2 of DDB1- and CUL4-associated factor 1	0	0	0	0	0	0	0	0	0	0	0	0	0	0	0	0.87284	1.03879
DCAF11	DDB1- and CUL4-associated factor 11	15.9928	5.56072	9.16462	29.4147	4.19845	3.44729	18.2425	0	0.972873	4.9258	0	7.55409	4.14624	0	3.88711	3.36849	9.89073
DCAF6	Isoform of Q58WW2, Isoform 3 of DDB1- and CUL4-associated factor 6	142.307	20.3437	18.1599	25.8264	32.6354	19.6055	15.0933	27.2199	12.1327	22.6036	26.5577	15.6777	31.525	28.1337	11.1206	33.9027	2.586
DCAF7	DDB1- and CUL4-associated factor 7	0	7.08485	0	0	5.56658	7.32786	0	0	11.6294	0	0	12.0083	3.73039	16.9366	5.77998	9.00399	7.02794
DCAF8	DDB1- and CUL4-associated factor 8	5.15733	10.5446	4.16404	0	5.47128	4.76077	0	0	1.59572	3.17378	0	0	5.00097	0	2.05223	8.89272	5.97074
DCAF8	Isoform of Q5TAQ9, Isoform 2 of DDB1- and CUL4-associated factor 8	0	477.563	477.563	985.971	0	0	930.646	0	141.305	191.107	0	0	0	0	234.87	0	429.367
DCAKD	Dephospho-CoA kinase domain-containing protein	0	5.17405	0	0	0	0	0	0	0	0	0	0	0	0	3.94028	24.3913	0
DCD	Dermcidin	0	1.778	1.778	1.778	0	0	0	0	0	0	0	0	0	0	0	0	0
DCLK1	Serine/threonine-protein kinase DCLK1	0	30.153	30.153	30.153	0	0	0	0	15.76	0	0	14.6111	0	0	12.6307	25.4528	41.6801
DCN	Decorin	582.137	251.264	218.784	121.833	68.3579	58.1537	180.171	289.192	60.5977	61.5853	284.309	218.415	124.066	79.091	46.4758	157.556	283.158
DCTN1	Dynactin subunit 1;Isoform of Q14203, Isoform 6 of Dynactin subunit 1	31.6538	18.2865	30.4099	45.4846	18.5434	20.1966	30.0943	31.8556	10.6551	30.7948	36.0156	34.0943	21.8904	32.5857	18.5151	34.9168	22.5646
DCTN2	Dynactin subunit 2;Isoform of Q13561, Isoform 2 of Dynactin subunit 2;Isoform of Q13561, Isoform 3 of Dynactin subunit 2	23.6007	25.289	20.9611	0	16.2065	24.716	11.3158	18.7493	14.5096	14.4736	0	15.1908	24.3195	0	16.193	34.414	17.3952
DCTN3	Dynactin subunit 3	0	14.6937	0	0	6.24581	9.61562	0	0	5.62285	0	0	0	9.3101	0	4.84425	13.4597	14.2636
DCTN4	Dynactin subunit 4	15.6829	0	0	0	12.4994	10.9566	0	0	10.5574	0	0	0	10.2602	0	3.90955	14.5658	0
DCTN5	Dynactin subunit 5;Isoform of Q9BTE1, Isoform 2 of Dynactin subunit 5	0	6.43178	6.07736	0	0	0.75349	0	0	0	0	0	2.14922	0	0	2.47872	15.0951	5.35955
DCTN6	Dynactin subunit 6	0	29.0089	29.0089	29.0089	0	0	0	0	0	0	0	0	0	0	0	95.0025	0
DCUN1D1	DCN1-like protein 1	0	0	0	0	6.59612	0	0	0	0	0	0	0	4.66074	0	0	6.48089	0
DCUN1D2	DCN1-like protein 2	12.6219	13.1229	17.0929	7.81923	4.90895	5.80333	10.7148	14.4439	5.61508	10.1223	21.2858	12.9772	6.64132	7.26152	6.75191	4.1232	6.92832
DCXR	L-xylulose reductase	5.83882	34.6682	13.7188	12.6755	12.2487	10.3867	18.6545	17.9633	12.822	47.4435	19.0937	19.5201	33.2778	8.7524	23.2128	25.5585	15.788
DDB1	DNA damage-binding protein 1	74.3747	38.8178	18.3618	20.8384	30.6965	32.6195	5.83424	10.8439	17.4846	12.7637	0	13.0071	42.4282	8.93773	20.4516	38.845	20.9618
DDHD2	Phospholipase DDHD2	0	0	0	0	0	0	30.1221	0	0	0	38.0268	0	0	0	0	0	0
DDOST	Dolichyl-diphosphooligosaccharide--protein glycosyltransferase 48 kDa subunit	751.84	25.3823	58.9406	39.3065	18.3142	30.7169	87.6162	111.118	46.4468	75.7665	30.0809	47.6301	33.186	94.8041	30.1875	50.0075	41.1555
DDRGK1	DDRGK domain-containing protein 1	8.36614	4.14411	10.2215	20.7713	8.43896	5.1449	13.3778	14.0503	5.51006	20.8534	12.5398	7.49863	4.47048	20.3436	3.09618	53.757	3.63436
DDX1	ATP-dependent RNA helicase DDX1	36.7812	30.0491	27.8622	31.2007	22.2121	26.6733	21.5469	43.1505	24.1411	47.9156	24.032	30.555	23.4668	23.7371	29.5071	51.4796	37.0364
DDX17	Probable ATP-dependent RNA helicase DDX17	92.9235	112.832	66.346	24.8293	21.5968	47.6406	24.2708	45.5392	21.0405	37.9819	25.1704	56.2836	23.5101	43.9367	50.8542	88.8454	69.3152
DDX18	ATP-dependent RNA helicase DDX18	5.30427	4.71336	4.71336	4.71336	8.3462	9.70906	5.0943	4.08776	6.18666	7.28412	0	9.08828	6.97035	4.91957	13.0415	5.66937	11.3273
DDX19B	ATP-dependent RNA helicase DDX19B	14.1653	14.7343	14.5116	21.7954	10.7768	9.50555	13.7463	22.3865	7.12617	20.3178	31.6585	10.9947	12.614	19.9263	10.8549	17.2399	15.4074
DDX20	Probable ATP-dependent RNA helicase DDX20	0	4.37553	4.69585	27.559	1.77496	0	24.0927	0	1.73283	11.953	0	14.5842	2.29644	19.419	0	2.86639	0.571911
DDX21	Nucleolar RNA helicase 2	26.2861	20.9716	24.941	8.96322	20.7438	19.9149	25.5496	46.6859	15.3623	51.6865	20.9889	35.382	19.5729	33.4293	19.671	43.9577	34.9324
DDX23	Probable ATP-dependent RNA helicase DDX23	27.1035	27.9081	22.4086	19.6139	44.9147	34.7358	25.1643	36.8202	37.4418	45.9174	18.5434	28.4696	60.1665	35.1097	34.9886	117.797	38.0214
DDX24	ATP-dependent RNA helicase DDX24	0	5.08079	0	0	6.12476	2.1492	0	0	2.9279	0	0	0	5.62801	0	2.65232	51.2784	3.41766
DDX27	Probable ATP-dependent RNA helicase DDX27	12.3573	11.4375	19.1212	19.1212	18.3353	19.3588	8.18624	10.5849	12.1971	15.5875	5.03605	12.4704	24.7203	10.1188	17.6574	24.9652	16.1261
DDX28	Probable ATP-dependent RNA helicase DDX28	16.3503	4.0386	11.7116	177.241	0	0	11.582	13.384	0	0	8.39248	0	1.84567	3.4453	0	0	0
DDX39B	Spliceosome RNA helicase DDX39B	22.8363	31.4652	26.1767	30.5467	20.1089	17.8105	23.6148	32.3956	22.2975	46.3103	21.1539	39.3171	24.2412	43.1347	26.7502	60.2747	57.2833
DDX3X	ATP-dependent RNA helicase DDX3X;Isoform of O00571, Isoform 2 of ATP-dependent RNA helicase DDX3X	133.667	158.501	135.711	72.8055	23.7733	79.4836	59.6327	66.2958	13.3954	31.4541	79.5958	62.3709	13.34	35.4917	29.4528	30.9838	34.3264
DDX3Y	ATP-dependent RNA helicase DDX3Y;Isoform of O15523, Isoform 2 of ATP-dependent RNA helicase DDX3Y	0	0	0	0	0	0	0	19.3057	0	7.83028	0	0	0	8.88029	0	8.73443	6.87905
DDX42	ATP-dependent RNA helicase DDX42	0	8.50611	0	0	1.8599	0	0	0	0	0	0	0	0	0	0	17.4435	0
DDX46	Isoform of Q7L014, RNA helicase	0	7.65651	7.65651	7.65651	9.75414	8.64923	0	0	4.21654	8.11105	0	5.26844	10.4822	4.7668	6.69309	8.38561	5.12659
DDX46	Probable ATP-dependent RNA helicase DDX46	26.2256	41.6036	24.7751	25.8205	54.4113	55.5491	14.3049	25.9409	24.5164	48.6606	20.8877	30.7031	75.189	22.5594	44.2208	195.54	41.8339
DDX47	Probable ATP-dependent RNA helicase DDX47;Isoform of Q9H0S4, Isoform 2 of Probable ATP-dependent RNA helicase DDX47	0	2.20055	3.23307	3.23307	1.01927	0.982601	0	0	1.0766	2.34087	0	1.6091	0.537223	0	1.33668	0	2.27525
DDX5	Probable ATP-dependent RNA helicase DDX5	4.56274	3.7431	0	0	0	2.56022	0	0	0	3.62474	0	3.1123	2.05426	0	2.70911	7.74881	5.53768
DDX50	ATP-dependent RNA helicase DDX50	14.7409	2.81729	8.25115	15.519	3.6567	3.96805	10.8989	2.57386	3.29046	8.27327	24.0652	6.17564	3.3186	0	3.5288	8.20606	4.59651
DDX52	Probable ATP-dependent RNA helicase DDX52	0	3.43662	3.43662	3.43662	5.23949	6.79168	0	0	0	8.39609	0	5.07787	0	0	4.85542	2.20717	0
DDX54	ATP-dependent RNA helicase DDX54;Isoform of Q8TDD1, Isoform 2 of ATP-dependent RNA helicase DDX54	4.85205	5.28848	5.28848	5.28848	8.58398	6.51594	0	2.86474	3.38498	7.56793	0	3.20761	8.02148	5.19311	4.41089	7.78099	4.84985
DDX56	Probable ATP-dependent RNA helicase DDX56;Isoform of Q9NY93, Isoform 2 of Probable ATP-dependent RNA helicase DDX56	0	2.43182	0	0	2.77006	2.13687	0	0	0	0	0	0	2.05378	0	2.38192	6.77384	4.19593
DDX58	Antiviral innate immune response receptor RIG-I	0	0	0	0	0	0	0	0	1.89172	0	0	0	0	0	0	0	0
DDX6	Probable ATP-dependent RNA helicase DDX6	24.3067	19.5718	31.1325	26.9317	9.18309	8.70918	5.07674	28.6079	11.1521	18.6413	12.1672	14.8451	8.53797	12.1822	8.91922	20.7126	17.5278
DECR1	2,4-dienoyl-CoA reductase [(3E)-enoyl-CoA-producing], mitochondrial;Isoform of Q16698, Isoform 2 of 2,4-dienoyl-CoA reductase [(3E)-enoyl-CoA-producing], mitochondrial	154.57	256.703	155.351	147.899	123.962	109.138	28.7399	70.2402	48.1677	66.2944	63.3272	78.0876	154.438	43.6443	118.066	170.073	139.485
DECR2	Peroxisomal 2,4-dienoyl-CoA reductase [(3E)-enoyl-CoA-producing]	0	0	0	0	0	0	0	0	0	0	0	0	3.41786	0	0	4.78779	0
DEFA1B;DEFA3	Neutrophil defensin 1;Neutrophil defensin 3	8.41057	22.1478	26.3703	4.63302	11.4206	5.49133	3.95535	14.0471	4.50253	42.4793	8.74762	39.0555	10.0938	19.1085	28.5185	22.6118	34.1294
DEK	Protein DEK	44.599	63.9633	56.7564	34.9916	93.0227	105.457	40.0207	38.966	89.0956	77.6206	22.5782	63.8825	106.944	54.2409	82.9138	93.4189	80.1361
DENND4C	DENN domain-containing protein 4C	0	21.1267	136.998	0	0	19.8782	0	0	25.6954	127.578	0	0	42.4966	273.67	18.4173	0	19.7846
DENR	Density-regulated protein	69.3945	112.21	79.8941	7.21546	38.0968	47.0411	12.612	35.244	30.8643	61.4295	0	65.9754	35.1605	18.7468	59.9552	143.693	129.577
DEPTOR	DEP domain-containing mTOR-interacting protein	8.04128	19.2279	12.5781	23.279	6.09381	10.2324	20.5109	15.6742	0	6.95308	50.4999	17.4816	8.49874	19.0821	193.431	0.958153	224.972
DERA	Deoxyribose-phosphate aldolase	24.77	19.5403	0	0	0	0	0	0	0	28.3973	0	14.709	0	19.21	6.2723	9.67687	21.6934
DERL1	Derlin-1;Isoform of Q9BUN8, Isoform 2 of Derlin-1	15.0878	7.48223	14.1193	39.2703	2.09165	4.18965	33.0967	17.6151	0	7.34137	69.086	13.3746	4.28602	15.3295	0	5.57487	6.80187
DES	Desmin	11187.3	907.676	5203.73	13423.4	519.384	748.82	13091.4	14668.5	751.547	4050.21	20945.5	3869.74	1150.68	11703.8	389.697	1558.24	472.094
DGKZ	Isoform of Q13574, Isoform 2 of Diacylglycerol kinase zeta	20.7742	32.8421	19.5396	12.1581	21.9376	19.058	4.66858	11.0481	7.12617	15.1662	0	11.9421	15.6587	9.53295	12.9547	92.5624	11.9517
DGLUCY	Isoform of Q7Z3D6, Isoform 2 of D-glutamate cyclase, mitochondrial	0	69.4594	15.5925	18.7527	23.6477	0	5.77012	21.5618	5.48095	0	0	7.17764	16.25	10.6372	10.7752	0	0
DHCR24	Delta(24)-sterol reductase	20.1384	5.70862	16.1813	22.4887	9.76762	2.61986	5.51804	13.8927	0.93359	11.6139	11.9975	0	0	10.9101	1.83369	2.9767	4.70574
DHCR7	7-dehydrocholesterol reductase	6.13233	0	0	11.3884	0	0	0	10.0043	0	0	12.7435	1.73613	1.62538	9.79326	0	0	0
DHODH	Dihydroorotate dehydrogenase (quinone), mitochondrial	121.906	0	0	0	0	0	0	7.53678	0	7.45894	0	0	0	4.33838	0	13.4566	2.54993
DHRS1	Dehydrogenase/reductase SDR family member 1	0	2.95686	0	0	0	0	0	0	0	0	0	0	0	0	0	0	0
DHRS11	Dehydrogenase/reductase SDR family member 11	0	1.89248	1.89248	1.89248	0	0	0	0	0	0	0	0	0	0	0	0	3.32605
DHRS4	Dehydrogenase/reductase SDR family member 4	0	0	7.69333	40.7534	6.41488	7.6909	0	13.3102	4.55676	0	0	5.7264	6.06114	7.18501	9.15855	5.76282	5.7099
DHRS7	Dehydrogenase/reductase SDR family member 7;Isoform of Q9Y394, Isoform 2 of Dehydrogenase/reductase SDR family member 7	155.749	87.0023	47.9198	121.05	46.4931	32.3056	31.9142	42.2752	14.433	23.3441	27.8542	30.3027	40.2768	44.2718	34.7798	78.8197	45.1261
DHRS7B	Dehydrogenase/reductase SDR family member 7B	111.539	26.603	64.2709	137.519	15.3776	12.1584	80.4423	112.147	17.0945	51.5795	166.108	16.8648	18.8128	103.807	13.5029	16.7354	24.0175
DHRS7C	Dehydrogenase/reductase SDR family member 7C;Isoform of A6NNS2, Isoform 2 of Dehydrogenase/reductase SDR family member 7C	365.532	28.69	86.0428	116.51	20.7009	8.68515	83.0969	143.975	21.7649	69.5949	173.018	28.4107	19.4202	127.887	16.0039	19.8534	32.676
DHTKD1	2-oxoadipate dehydrogenase complex component E1	0	34.3345	55.5923	189.699	7.88295	6.13306	0	21.0274	7.02678	19.5829	294.503	147.803	10.3194	0	16.5054	27.3234	13.3361
DHX15	ATP-dependent RNA helicase DHX15	21.9041	8.60064	72.5295	111.062	5.13439	6.26004	7.89196	15.1875	4.13672	12.87	0	15.2399	9.22687	13.0325	6.20193	9.95944	11.6179
DHX16	Pre-mRNA-splicing factor ATP-dependent RNA helicase DHX16	55.4403	56.7846	48.6312	50.3227	52.5036	40.5487	48.2819	73.3307	19.0483	69.8678	74.2147	43.0905	29.9126	54.7302	25.7589	165.857	26.7811
DHX29	ATP-dependent RNA helicase DHX29	18.1228	17.961	20.4746	14.1796	7.69288	14.5204	8.03683	15.8923	4.51394	8.81003	0	18.2088	2.50758	7.75046	20.069	20.8274	16.4032
DHX30	ATP-dependent RNA helicase DHX30;Isoform of Q7L2E3, Isoform 2 of ATP-dependent RNA helicase DHX30;Isoform of Q7L2E3, Isoform 3 of ATP-dependent RNA helicase DHX30	3.78901	1.38239	0	0	0	3.39686	0	0	0	2.7924	0	4.70524	1.03028	0	1.19985	2.54001	3.74997
DHX32	Putative pre-mRNA-splicing factor ATP-dependent RNA helicase DHX32;Isoform of Q7L7V1, Isoform 2 of Putative pre-mRNA-splicing factor ATP-dependent RNA helicase DHX32	0	0	0	0	0	0	0	0	0	14.3939	0	0	0	0	0	0	0
DHX36	ATP-dependent DNA/RNA helicase DHX36	9.28807	5.12662	13.6149	10.4055	5.78747	6.864	6.08253	5.07324	3.83315	10.553	6.14597	8.88345	6.27993	11.0389	5.90781	10.9279	7.39653
DHX37	Probable ATP-dependent RNA helicase DHX37	0	0	0	0	2.25314	4.38003	0	0	0	0	0	7.81595	3.43206	7.66703	0	5.66154	3.25633
DHX38	Pre-mRNA-splicing factor ATP-dependent RNA helicase PRP16	6.63171	4.03767	7.58778	0	4.78508	3.56597	0	0	2.37387	0	0	5.56393	3.03917	0	0	3.11986	5.2243
DHX8	ATP-dependent RNA helicase DHX8	0	2.05225	2.05225	2.05225	2.3291	0	0	0	1.69183	1.85899	0	0	2.35806	0	1.45555	22.5183	1.85067
DHX9	ATP-dependent RNA helicase A	277.86	214.107	251.892	119.142	123.336	96.7113	157.974	217.363	70.2354	178.393	103.822	290.524	125.099	141.133	129.457	213.617	283.092
DIABLO	Diablo IAP-binding mitochondrial protein;Isoform of Q9NR28, Isoform 2 of Diablo IAP-binding mitochondrial protein	0	17.5886	4.87657	0	8.16373	6.63708	0	0	0	0	0	0	11.6053	0	4.1498	8.58489	6.23488
DIAPH1	Protein diaphanous homolog 1	0	11.2339	22.862	93.2318	0	0	0	38.8048	0	126.554	42.6275	0	10.5719	0	0	11.8014	0
DIAPH2	Isoform of O60879, Isoform 2 of Protein diaphanous homolog 2	52.7139	0	3.50602	0	11.2432	0	0	0	1.14171	0	0	0	1.07067	0	0	0	0
DICER1	Endoribonuclease Dicer;Isoform of Q9UPY3, Isoform 2 of Endoribonuclease Dicer	0	1.09403	12.6013	16.3819	0.225159	0	12.7199	11.945	0	0	22.8765	9.12393	0	13.5247	0	0	0
DIO2	Type II iodothyronine deiodinase	0	26.7012	268.791	337.803	11.1298	16.0316	278.41	241.983	22.3078	194.123	485.948	185.687	18.1616	251.494	7.55312	17.4074	8.96248
DIP2A	Disco-interacting protein 2 homolog A;Isoform of Q14689, Isoform 6 of Disco-interacting protein 2 homolog A	0	2.26533	2.26533	2.26533	1.12406	1.35045	0	0	0	2.01038	0	4.1868	0.73393	0	1.13613	2.50978	2.78181
DIP2C	Disco-interacting protein 2 homolog C	74.7524	97.0803	91.7307	29.1517	30.9948	76.8028	31.3823	53.5779	43.0186	37.5126	20.4828	57.6875	14.8578	11.0034	109.428	96.3241	65.2421
DIP2C	Isoform of Q9Y2E4, Disco-interacting protein 2 homolog C	3.16465	0	0	0	2.385	2.22986	0	0	2.48003	0	0	0	0	0	0	0	0
DIS3	Exosome complex exonuclease RRP44	10.3711	0	0	0	0	8.70116	8.52677	0	0	0	15.7033	1.13287	0	8.90896	0	0	0
DIS3L2	DIS3-like exonuclease 2	0	1.8426	0	0	0	0	0	0	0	0	0	0	0	0	0	0	0
DKC1	H/ACA ribonucleoprotein complex subunit DKC1	30.2779	21.1024	29.7725	20.7188	21.2564	22.992	30.0943	36.0235	23.1983	51.8057	33.1887	43.5193	25.8318	44.3534	25.6582	59.1473	45.8383
DLAT	Dihydrolipoyllysine-residue acetyltransferase component of pyruvate dehydrogenase complex, mitochondrial	484.647	85.0415	148.052	519.833	60.435	83.9223	194.484	465.249	57.472	315.702	293.42	207.865	50.1135	346.041	64.7033	77.8278	54.3661
DLC1	Rho GTPase-activating protein 7	0	12.8567	40.5056	86.8089	0	0	56.0512	74.7112	15.3093	0	117.785	35.7669	7.91324	85.2957	9.56151	0	0
DLD	Dihydrolipoyl dehydrogenase, mitochondrial	295.07	272.666	217.728	232.522	100.136	112.506	72.8089	197.964	83.841	147.699	159.548	103.319	114.487	144.353	122.244	167.933	161.595
DLG1	Disks large homolog 1;Isoform of Q12959, Isoform 2 of Disks large homolog 1;Isoform of Q12959, Isoform 3 of Disks large homolog 1;Isoform of Q12959, Isoform 4 of Disks lar	0	0	0	0	0	7.24065	0	0	0	0	0	0	0	0	0	0	0
DLG4	Disks large homolog 4;Isoform of P78352, Isoform 2 of Disks large homolog 4;Isoform of P78352, Isoform 3 of Disks large homolog 4	0	0	9.36084	9.36084	2.11538	4.25968	0	0	0	7.01742	0	0	0	0	1.74754	0	1.50914
DLST	Dihydrolipoyllysine-residue succinyltransferase component of 2-oxoglutarate dehydrogenase complex, mitochondrial	277.732	193.924	167.77	519.833	113.341	146.244	178.931	460.772	95.8641	507.782	266.066	233.444	101.872	334.37	99.4321	178.663	89.213
DMAC1	Distal membrane-arm assembly complex protein 1;Isoform of Q96GE9, Isoform 2 of Distal membrane-arm assembly complex protein 1	27.8308	1.92722	33.4052	40.0188	4.2373	1.98416	34.0239	38.52	5.27784	63.1651	44.4212	11.7973	7.43112	30.7134	4.00891	0	2.78374
DMAC2L	ATP synthase subunit s, mitochondrial	17.7716	16.0854	7.38779	21.8355	4.40645	3.43777	5.12253	9.86474	1.96588	11.9695	14.4674	8.21641	14.0267	8.54136	3.78815	7.39665	11.1668
DMAP1	DNA methyltransferase 1-associated protein 1	0	0	0	0	1.57141	0	0	0	0	0	0	0	0	0	0	11.1567	0
DMD	Dystrophin;Isoform of P11532, Isoform 3 of Dystrophin;Isoform of P11532, Isoform 2 of Dystrophin	272.725	127.771	277.597	362.046	65.3264	55.9342	419.068	394.081	65.7743	205.153	632.106	177.78	72.1863	305.511	38.4261	86.3644	50.4346
DMRT2	Doublesex- and mab-3-related transcription factor 2	0	0	0	0	0	0	0	0	0	0	0	0	0	0	0	6.48388	0
DMTN	Dematin	0	8.33357	0	0	0	0	0	0	0	3.4616	0	0	0	2.61654	18.8811	20.8274	10.4623
DNAAF1	Isoform of Q8NEP3, Isoform 2 of Dynein axonemal assembly factor 1	3.52391	3.79692	13.3603	5.92603	0	0	0	0	4.33867	10.8462	7.15468	0	0	0	0	7.24661	8.60257
DNAAF5	Dynein axonemal assembly factor 5	0	2.23991	0	0	3.79131	0	0	0	0	0	0	0	0	0	0	0	0
DNAH2	Dynein axonemal heavy chain 2	513.364	59.8454	10.5564	34.9997	58.3161	0	13.96	16.3375	7.06246	18.6628	39.2455	12.9772	67.5079	15.8828	13.8079	28.5585	43.8963
DNAJA1	DnaJ homolog subfamily A member 1	5.69673	4.24357	5.50319	0	3.40008	3.37347	0	0	3.24456	5.17103	0	2.75919	2.57605	2.42285	2.00506	5.42044	3.42711
DNAJA2	DnaJ homolog subfamily A member 2	96.4551	64.9129	62.577	61.6828	58.7474	58.3549	29.6541	59.3726	57.8837	32.0094	39.8832	51.3786	59.7385	45.6801	52.6171	76.5658	49.7884
DNAJA3	DnaJ homolog subfamily A member 3, mitochondrial	125.639	89.7699	136.998	87.7736	64.4449	71.9411	66.6169	86.2553	75.2759	136.734	77.0708	125.338	45.8305	109.604	100.862	113.327	112.52
DNAJA4	Isoform of Q8WW22, Isoform 2 of DnaJ homolog subfamily A member 4	25.1724	21.2976	61.026	17.3007	8.96373	10.3461	6.30935	19.0496	5.08928	9.53624	26.1511	6.12889	8.42858	8.8456	10.419	59.9011	26.7441
DNAJB11	DnaJ homolog subfamily B member 11	0	0	0	0	0	0	0	0	0	0	0	0	0	0	7.5427	3.85953	1.4303
DNAJB12	DnaJ homolog subfamily B member 12	0	0	0	0	0	0	0	0	0	0	0	0	0	0	0	5.91337	0
DNAJB2	DnaJ homolog subfamily B member 2	0	0	0	0	0	0	20.0579	0	0	0	0	0	11.8947	0	0	0	0
DNAJB4	DnaJ homolog subfamily B member 4	51.0535	48.1871	40.3473	32.8446	19.8239	23.2262	22.5988	38.1229	18.5334	31.1657	32.945	23.9708	18.8085	31.1191	24.4921	81.6084	37.1731
DNAJB5	DnaJ homolog subfamily B member 5;Isoform of O75953, Isoform 2 of DnaJ homolog subfamily B member 5;Isoform of O75953, Isoform 3 of DnaJ homolog subfamily B member 5	7.94923	8.6483	8.6483	8.6483	1.98011	1.44437	0	0	2.4806	0	0	5.92491	1.51654	0	1.94638	3.53537	3.79689
DNAJB6	DnaJ homolog subfamily B member 6	12.3744	7.09955	4.40976	9.72891	5.07445	4.79377	16.3751	15.5234	4.53269	12.6846	14.3678	10.3343	4.89277	12.0872	2.6615	37.7168	2.73797
DNAJC10	DnaJ homolog subfamily C member 10;Isoform of Q8IXB1, Isoform 2 of DnaJ homolog subfamily C member 10	0	0	0	0	1.01435	0	0	0	0	0	0	0	1.59021	0	0	2.15494	1.53967
DNAJC11	DnaJ homolog subfamily C member 11;Isoform of Q9NVH1, Isoform 3 of DnaJ homolog subfamily C member 11	53.7558	10.3522	38.9058	66.0943	5.30749	3.9827	52.7697	71.6615	6.47823	32.7927	97.8341	30.3586	9.60626	79.4195	10.5324	11.8123	11.747
DNAJC13	DnaJ homolog subfamily C member 13	25.4288	9.37845	12.2128	25.7018	6.97732	8.26566	18.8488	27.3203	6.36585	17.0481	36.2903	14.2096	8.88903	26.6641	6.80968	28.7233	11.5247
DNAJC17	DnaJ homolog subfamily C member 17	0	0	0	0	0.705649	0	0	0	0	0	0	0	0	0	0	0	1.37698
DNAJC19	Mitochondrial import inner membrane translocase subunit TIM14	14.8226	6.11689	19.8023	24.5564	11.7839	12.7902	15.6309	20.6817	6.91443	21.2558	13.1519	11.6247	13.1448	24.7017	6.28676	75.5675	6.12954
DNAJC2	DnaJ homolog subfamily C member 2	11.1822	14.8194	15.7114	12.4958	11.8492	16.5264	5.63618	11.7675	7.72959	10.2183	0	7.04339	3.72953	5.50589	13.232	68.2079	10.5373
DNAJC21	DnaJ homolog subfamily C member 21;Isoform of Q5F1R6, Isoform 3 of DnaJ homolog subfamily C member 21	17.0187	16.517	14.3554	13.9625	25.6206	21.1776	10.2184	17.143	18.191	20.6717	15.3388	14.4738	12.6664	13.2656	16.4069	107.037	13.0927
DNAJC3	DnaJ homolog subfamily C member 3	0	0	0	0	6.60829	0	0	0	3.1157	0	0	0	0	0	0.930736	0	10.4455
DNAJC30	DnaJ homolog subfamily C member 30, mitochondrial	22.789	0	2.7423	0	0	0	0	14.5407	0	11.6246	0	0	0	10.3283	0	0	0
DNAJC7	DnaJ homolog subfamily C member 7	11.4268	12.3149	15.4104	11.9361	15.5808	14.5337	4.98752	9.44247	7.49819	29.7973	5.95649	15.4128	12.6199	17.0148	11.2493	19.1617	8.13258
DNAJC8	DnaJ homolog subfamily C member 8	0	5.4542	5.4542	5.4542	3.65838	0	0	0	0	0	0	0	0	0	0	0	0
DNAJC9	DnaJ homolog subfamily C member 9	0	11.8176	11.8176	11.8176	0	22.9709	0	0	0	0	0	0	0	0	10.2383	7.24494	15.4856
DNASE1L1	Deoxyribonuclease-1-like 1	126.277	7.18341	1.54388	10.2604	0	0	15.3386	0	0	1.63372	0	0	0	0	0	1.42015	0
DNM1L	Isoform of O00429, Isoform 4 of Dynamin-1-like protein	14.8329	19.0472	17.2193	22.6081	11.8547	9.28918	8.89579	14.2163	4.88603	13.3806	22.1355	6.57933	14.3832	8.28948	8.58078	78.8379	12.2385
DNM2	Isoform of P50570, Isoform 2 of Dynamin-2	16.5092	12.7594	23.5079	24.0527	12.2797	10.3199	11.7404	19.5158	8.49486	16.7293	24.4281	13.6327	9.41574	12.9666	12.4287	45.5234	19.5717
DNM2	Isoform of P50570, Isoform 4 of Dynamin-2	0	0	0	0	0	3.90551	0	0	0	0	0	0	0	0	0	0	0
DNM3	Isoform of Q9UQ16, Isoform 2 of Dynamin-3;Isoform of Q9UQ16, Isoform 3 of Dynamin-3	0	4.47539	6.72225	10.6749	3.04852	3.36649	6.40154	7.72299	3.25129	7.74956	6.88003	5.4649	3.94598	5.46295	5.25444	0	7.95845
DNMBP	Dynamin-binding protein	0	0	0	0	0	0	0	0	0	0	1.52437	0	0	0	0	0	0
DNMT1	DNA (cytosine-5)-methyltransferase 1;Isoform of P26358, Isoform 2 of DNA (cytosine-5)-methyltransferase 1;Isoform of P26358, Isoform 3 of DNA (cytosine-5)-methyltransferase 1	0	0	0	0	0	0	0	0	0	0	0	0	0	0	2.97322	0	5.74815
DNPEP	Aspartyl aminopeptidase;Isoform of Q9ULA0, Isoform 2 of Aspartyl aminopeptidase	0	0	0	148.718	3.87159	0	0	0	0	0	0	0	12.9317	0	27.4237	0	0
DNTTIP2	Deoxynucleotidyltransferase terminal-interacting protein 2	0	0	0	0	4.58447	0	0	0	2.0814	0	0	0	15.4937	0	0	33.7159	0
DOCK1	Dedicator of cytokinesis protein 1	0	0	0	0	0	0	0	0	0	0	0	0	0	0	0.617201	0	1.4482
DOHH	Deoxyhypusine hydroxylase	0	0	0	0	0	0	0	0	0	0	0	0	0	0	0	6.7832	0
DPF2	Zinc finger protein ubi-d4	0	0	0	0	0	0	0	0	0	0	0	0	0	0	0	17.1449	0
DPF3	Isoform of Q92784, Isoform 3 of Zinc finger protein DPF3	3.95299	7.33383	7.33383	7.33383	3.00461	3.22758	0	0	2.78777	2.86865	0	3.1202	0	0	3.90595	0	6.26078
DPM1	Dolichol-phosphate mannosyltransferase subunit 1	0	52.4724	423.56	390.539	28.7335	284.366	252.339	307.033	274.319	0	347.048	307.314	200.288	271.598	315.883	43.7356	533.984
DPP3	Dipeptidyl peptidase 3	7.61948	20.1387	20.1387	20.1387	5.19384	3.42987	94.2724	0	0.663065	21.631	0	4.0849	6.76635	0	0	5.32641	7.34393
DPP9	Dipeptidyl peptidase 9;Isoform of Q86TI2, Isoform 2 of Dipeptidyl peptidase 9	131.137	7.4633	9.10363	0	7.14807	6.16421	0	0	6.45143	12.4991	0	6.36183	7.30053	16.2902	5.17758	8.52972	4.39975
DPT	Dermatopontin	1.48602	164.184	99.0865	30.8435	33.6348	44.8722	36.0566	72.8427	42.3698	20.9352	53.7391	60.6013	81.2371	19.2765	114.058	40.4981	502.028
DPY30	Protein dpy-30 homolog	0	2.37975	2.37975	2.37975	0	0.741613	0	0	1.73843	0	0	0	1.36475	0	0	2.36556	2.27158
DPYSL2	Isoform of Q16555, Isoform 2 of Dihydropyrimidinase-related protein 2	5.78929	4.66478	5.45902	0	0	0	0	8.93482	1.41663	6.23415	0	5.78338	2.7884	5.73228	1.82023	4.05354	8.68617
DPYSL3	Isoform of Q14195, Isoform LCRMP-4 of Dihydropyrimidinase-related protein 3	84.2996	51.1483	43.895	53.637	26.4295	45.3291	29.2405	39.2361	27.6857	36.5997	56.9233	44.6151	30.8642	34.0116	27.2601	40.7882	31.9395
DR1	Protein Dr1	0	0	0	30.5889	0	0	0	0	0	0	0	0	0	0	0	0	0
DRAP1	Dr1-associated corepressor;Isoform of Q14919, Isoform 2 of Dr1-associated corepressor	0	4.51576	0	0	0	0	0	0	0	0	0	0	2.03027	0	2.40396	0	7.98047
DRG1	Developmentally-regulated GTP-binding protein 1	43.4036	53.5465	43.3725	0	7.19596	29.8729	64.1778	50.0133	138.438	0	0	36.2979	15.8145	0	48.3756	42.1245	50.5275
DRG2	Developmentally-regulated GTP-binding protein 2	0	16.0447	10.6344	0	7.6364	0	0	121.839	0	0	0	5.12722	8.11063	0	2.84202	5.18125	5.9625
DSP	Desmoplakin	0	0	0	0	0	0	0	0	0	0	0	6.28756	0	0	0	0	0
DST	Dystonin	17.694	1.86565	8.50775	33.7959	5.20701	0	25.2746	18.6933	8.98372	27.8597	30.3103	12.5945	2.52322	12.4919	4.66044	9.77766	3.30848
DSTN	Destrin;Isoform of P60981, Isoform 2 of Destrin	13.0835	16.6545	23.1321	46.8235	6.58398	7.56968	10.9593	13.6705	4.46741	17.5905	6.86262	15.9508	10.3909	16.5435	6.78151	18.1901	25.0512
DTD1	D-aminoacyl-tRNA deacylase 1	0	6.40222	0	0	2.24124	0	0	0	0	0	0	0	6.55774	0	4.20752	0	4.10325
DTNA	Dystrobrevin alpha	51.5496	17.7227	40.7957	69.8175	13.8704	12.5625	70.1269	74.7973	9.51385	18.0209	76.101	33.6963	12.2618	43.8962	10.4118	15.2172	9.67004
DTNA	Isoform of Q9Y4J8, Isoform 16 of Dystrobrevin alpha;Isoform of Q9Y4J8, Isoform 5 of Dystrobrevin alpha	6.45246	0	0	5.66193	0	0	0	11.6946	0	0	18.7754	5.47371	0	0	0	0	0
DTX4	Isoform of Q9Y2E6, Isoform 2 of E3 ubiquitin-protein ligase DTX4	23.3145	0	10.4451	0	0	0	7.825	0	0	19.7641	0	0	0	6.70235	0	0	0
DUSP12	Dual specificity protein phosphatase 12	0	0	0	0	0	0	0	0	0	0	0	11.1682	0	0	0	0	0
DUSP13	Isoform of Q9UII6, Dual specificity protein phosphatase 13 isoform A	0	0	0	55.7011	0	4.07922	0	0	0	0	0	0	0	0	0	0	0
DUSP13B	Isoform of Q9UII6, Isoform 4 of Dual specificity protein phosphatase 13 isoform B	15.9304	8.57691	7.87254	6.51125	3.52443	2.96331	13.2643	0	2.95363	12.6351	0	7.38383	3.50877	9.65222	3.64105	7.44277	5.68366
DUSP26	Dual specificity protein phosphatase 26	8.5492	1.88162	1.88162	1.88162	2.46541	2.59943	8.61955	0	1.90878	6.47556	14.315	4.75753	1.72844	4.41598	1.92631	1.65857	1.59893
DUSP28	Dual specificity phosphatase 28	0	11.2132	9.51075	10.6161	11.0991	7.17592	10.7445	6.97727	7.88417	11.2974	13.896	7.14467	7.4878	9.69231	6.294	12.8332	0
DUSP29	Dual specificity phosphatase 29	59.3096	1.77064	0	0	3.39382	4.54441	0	10.0389	4.23991	0	0	3.40865	4.29294	0	2.95683	2.83292	3.33525
DUSP3	Dual specificity protein phosphatase 3	36.2681	12.9399	25.3521	38.2353	5.72913	7.24899	34.8967	36.0152	3.8094	21.5168	38.1057	20.596	12.3411	33.7853	5.8739	34.1771	6.99243
DUT	Deoxyuridine 5'-triphosphate nucleotidohydrolase, mitochondrial	0	0	0	0	0	0	0	0	0	0	0	0	0	0	0	5.21236	0
DVL1	Isoform of O14640, Isoform 2 of Segment polarity protein dishevelled homolog DVL-1	82.3048	18.8769	18.8769	18.8769	0	9.05268	149.24	0	0	0	0	0	0	22.9629	2.93851	0	4.88122
DVL3	Segment polarity protein dishevelled homolog DVL-3;Isoform of Q92997, Isoform 2 of Segment polarity protein dishevelled homolog DVL-3	0	3.84796	3.84796	3.84796	0	0	0	0	0	0	0	0	0	0	0	0	0
DYM	Dymeclin	0	3.88715	0	0	0	8.57783	3.18408	0	0	0	0	0	0	0	0	0	0
DYNC1H1	Cytoplasmic dynein 1 heavy chain 1	111.385	95.6381	90.4929	147.457	73.6358	80.0345	110.965	142.523	61.5965	121.305	153.246	113.287	73.7827	100.792	73.4559	155.645	121.907
DYNC1I2	Isoform of Q13409, Isoform 2B of Cytoplasmic dynein 1 intermediate chain 2;Isoform of Q13409, Isoform 2C of Cytoplasmic dynein 1 intermediate chain 2	10.6078	7.64242	10.2829	12.5882	5.28797	7.36338	11.6382	11.355	7.86966	11.1347	10.5972	6.66012	9.9576	9.3935	5.28721	54.1545	11.6689
DYNC1LI1	Cytoplasmic dynein 1 light intermediate chain 1	11.011	10.8976	11.2464	10.5284	4.38015	6.87349	7.44191	10.032	4.75397	6.78855	24.711	7.56453	5.36852	8.93773	5.50081	33.5919	14.2965
DYNC1LI2	Cytoplasmic dynein 1 light intermediate chain 2	9.77519	5.92013	5.92013	5.92013	4.72486	3.31801	5.37879	0	5.9123	6.64779	0	7.99617	5.0834	0	5.27991	7.54979	7.30345
DYNLL1	Dynein light chain 1, cytoplasmic	0	0	0	0	0	0	0	0	0	0	0	0	1.59498	0	0	0	0
DYNLL2	Dynein light chain 2, cytoplasmic	6.65925	6.51375	34.2385	4.0417	7.85396	17.4453	0	29.5587	7.32751	29.3344	59.8674	27.9371	16.891	65.9823	6.2406	18.938	18.278
DYNLT1	Dynein light chain Tctex-type 1	3.06779	3.50454	5.41271	6.20818	3.29525	1.98416	3.63316	4.69554	1.79993	7.04494	5.74632	7.34145	4.48182	6.97633	1.59634	0	5.32511
DYNLT3	Dynein light chain Tctex-type 3	0	0	0	0	0	0.887723	0	0	0	0	0	0	0	0	0.577732	6.80824	3.70193
DYRK1A	Dual specificity tyrosine-phosphorylation-regulated kinase 1A;Isoform of Q13627, Isoform 1 of Dual specificity tyrosine-phosphorylation-regulated kinase 1A;Isoform of Q13627, Is	0	0	0	0	0	11.7457	0	0	0	0	0	0	0	0	0	0	0
DYSF	Isoform of O75923, Isoform 8 of Dysferlin	156.036	88.3143	92.0905	214.025	57.4498	55.5747	103.296	200.625	36.6738	98.0793	78.3051	92.2745	65.4568	213.76	49.275	87.9498	84.0288
EARS2	Probable glutamate--tRNA ligase, mitochondrial	0	0	0	0	19.8011	19.5649	0	26.4537	0	0	0	0	28.1096	0	20.5649	49.9154	0
EBF2	Transcription factor COE2	0	0	0	0	0	0	0	0	0	0	0	0	0	0	0	7.2416	5.03417
EBNA1BP2	Probable rRNA-processing protein EBP2	0	0	0	0	1.01669	1.18489	0	0	0	0	0	0	2.63788	0	1.49805	31.9915	1.86607
EBP	3-beta-hydroxysteroid-Delta(8),Delta(7)-isomerase	0	0	0	0	0	0	0	51.3081	0	42.148	0	0	0	0	0	0	0
ECH1	Delta(3,5)-Delta(2,4)-dienoyl-CoA isomerase, mitochondrial	17.2673	48.5658	88.8412	32.4612	45.8975	15.8226	27.2386	31.8776	24.7318	89.4288	31.2241	26.939	71.1303	62.5356	19.7755	54.6934	11.7877
ECHDC1	Ethylmalonyl-CoA decarboxylase;Isoform of Q9NTX5, Isoform 2 of Ethylmalonyl-CoA decarboxylase	0	9.73937	0	0	4.63115	13.4084	3.22318	0	0	13.3468	0	9.20623	5.28877	0	4.19398	74.154	6.63939
ECHDC2	Enoyl-CoA hydratase domain-containing protein 2, mitochondrial	15.0012	1.29936	0	24.5338	0	0	11.076	29.046	0	14.3376	30.0739	12.1222	2.36894	12.8566	3.94754	0	2.07314
ECHDC3	Enoyl-CoA hydratase domain-containing protein 3, mitochondrial	0	0	0	0	0	0	0	0	0	0	0	0	0	0	9.86567	0	0
ECHS1	Enoyl-CoA hydratase, mitochondrial	38.5057	53.9052	49.6723	81.6891	22.8344	14.331	22.4225	43.7709	18.3424	30.2885	41.4276	15.83	39.9811	28.7361	19.6755	74.6852	20.1943
ECI1	Enoyl-CoA delta isomerase 1, mitochondrial	40.2092	0	0	170.359	2.1557	0	0	0	0	0	0	0	1.72367	0	89.6451	15.7737	0
ECI2	Enoyl-CoA delta isomerase 2;Isoform of O75521, Isoform 2 of Enoyl-CoA delta isomerase 2	34.7877	27.4366	31.5438	35.6012	15.5593	17.7614	24.4109	36.1648	21.8704	47.6735	48.8191	23.0347	25.3661	34.3975	24.5656	99.1596	28.0239
ECPAS	Proteasome adapter and scaffold protein ECM29	37.396	38.8804	27.594	42.1371	26.5637	18.6972	27.4274	31.3968	11.5254	26.4592	28.6873	25.7206	22.691	15.0566	15.0705	26.4932	23.5195
ECSCR	Endothelial cell-specific chemotaxis regulator	0	7.7416	7.7416	7.7416	0	4.32989	0	0	0	0	0	0	0	0	0	0	0
ECSIT	Evolutionarily conserved signaling intermediate in Toll pathway, mitochondrial	3.81879	1.7895	0	0	0.816749	0	1.37494	0	0	0	9.86484	0	0	5.42909	0	0	0
EDC3	Enhancer of mRNA-decapping protein 3	11.2623	0	0	10.6406	2.78092	3.61891	0	0	0	8.70918	0	0	0	0	2.77541	4.8332	0
EDC4	Enhancer of mRNA-decapping protein 4	21.5737	0	0	0	0	1.01503	0	22.4381	0	13.8445	23.0829	0	0	11.6152	0	0	0
EDF1	Endothelial differentiation-related factor 1	35.4671	59.3104	54.2144	24.2976	80.8516	53.6509	18.1378	18.4751	30.8288	61.7842	9.63807	31.1804	47.0278	20.4046	48.4872	33.7237	25.2888
EEA1	Early endosome antigen 1	0	0	0	0	18.1422	0	0	0	0	0	0	20.0716	8.58528	0	9.4586	0	0
EEF1A1;EEF1A1P5	Elongation factor 1-alpha 1;Putative elongation factor 1-alpha-like 3	11.6098	10.711	3.63341	6.05152	4.80716	5.58055	9.6869	17.076	5.09984	12.9681	43.0914	28.6274	6.90485	19.7573	5.63153	77.061	47.4491
EEF1A2	Elongation factor 1-alpha 2	558.889	719.003	581.587	644.858	716.62	738.716	538.623	815.616	562.544	1366.71	798.16	739.574	875.698	703.278	600.795	1505.34	964.336
EEF1B2	Elongation factor 1-beta	5.88336	38.25	25.4868	26.7279	39.3359	57.158	0	23.9103	35.2904	21.0949	16.7954	23.157	57.4189	21.98	25.7351	78.3853	24.4359
EEF1D	Isoform of P29692, Isoform 2 of Elongation factor 1-delta	109	123.376	84.8037	61.8108	89.5136	120.636	23.5931	79.3023	66.2912	53.3307	40.438	62.2561	105.841	49.1052	73.0343	149.498	73.9994
EEF1E1	Eukaryotic translation elongation factor 1 epsilon-1	0	8.95841	8.95841	8.43071	0	3.79995	0	0	0	0	0	0	0	0	2.07218	6.33483	11.4744
EEF1G	Elongation factor 1-gamma	102.17	123.348	84.1424	63.3671	119.396	151.174	37.5392	90.362	73.7151	66.6925	43.5201	70.6451	118.101	58.5635	78.2036	172.439	95.5935
EEF2	Elongation factor 2	62.9688	56.7977	55.8103	63.7036	21.9023	22.9128	31.1806	54.9776	17.5088	44.8412	51.498	30.1011	34.5346	58.281	20.0091	81.4394	48.1425
EEF2K	Eukaryotic elongation factor 2 kinase	12.4459	20.5225	35.9513	20.5225	6.78405	5.35769	0	60.7835	42.6537	0	76.3467	4.37806	6.18379	0	7.82937	25.04	11.9022
EEFSEC	Selenocysteine-specific elongation factor	25.4229	13.1592	19.8068	0	8.86929	5.56259	0	12.3278	8.25194	13.3222	0	10.0065	5.99452	27.9015	8.08215	19.1177	12.8952
EEPD1	Endonuclease/exonuclease/phosphatase family domain-containing protein 1	0	11.4112	11.839	0	4.78397	5.12009	6.45186	0	0	0	0	0	3.88646	0	1.52029	4.45795	6.55584
EFCAB5	EF-hand calcium-binding domain-containing protein 5;Isoform of A4FU69, Isoform 3 of EF-hand calcium-binding domain-containing protein 5	0	5.19913	5.19913	5.19913	4.81935	0	0	0	0	0	0	0	0	0	0	0	9.3267
EFEMP1	EGF-containing fibulin-like extracellular matrix protein 1;Isoform of Q12805, Isoform 2 of EGF-containing fibulin-like extracellular matrix protein 1;Isoform of Q12805, Isoform 3 of	0	0	0	0	0	4.06422	0	0	0	0	0	0	0	0	0	0	0
EFEMP2	EGF-containing fibulin-like extracellular matrix protein 2	0	3.71391	0	0	0	0	0	0	0	0	0	0	0	0	0	6.25367	10.3093
EFHD1	EF-hand domain-containing protein D1	0	0	0	0	0	0	0	0	0.94745	0	0	0	0	0	0	0	0
EFHD2	EF-hand domain-containing protein D2	0	0	0	0	0	0	0	0	0	0	22.672	0	0	0	0	0	0
EFL1	Elongation factor-like GTPase 1	0	1.70424	2.9452	0	2.00396	1.34486	0	0	1.29109	0	0	2.05202	0.565789	1.97482	1.90777	0	2.02875
EFR3A	Protein EFR3 homolog A	0	5.25934	0	0	0	0	0	0	0	0	0	0	1.70473	0	0	3.50054	0
EFTUD2	116 kDa U5 small nuclear ribonucleoprotein component;Isoform of Q15029, Isoform 2 of 116 kDa U5 small nuclear ribonucleoprotein component	11.9791	9.92044	11.1999	0	8.28302	5.82341	7.01754	6.36775	7.24029	25.0021	5.61035	12.4762	10.2791	19.7391	7.68116	20.5748	16.9523
EGFLAM	Isoform of Q63HQ2, Isoform 2 of Pikachurin	26.7193	5.74025	11.8772	5.74025	3.23436	0	10.6019	7.99992	0	10.8562	16.7221	6.75588	0	18.4768	0	5.59674	5.76273
EGFR	Epidermal growth factor receptor	0	0	0	0	0	0	23.5876	0	0	0	0	0	0	0	0	0	0
EGLN1	Egl nine homolog 1	0	5.47307	11.474	0	0	2.50137	0	0	0	5.85298	0	0	0	11.5992	3.0264	13.9873	4.17377
EHBP1L1	EH domain-binding protein 1-like protein 1	24.9187	13.7826	26.237	84.482	8.19198	12.4876	6.86886	42.3337	7.84072	11.5419	16.9547	32.455	8.03072	15.6109	3.83554	10.7333	21.224
EHD1	EH domain-containing protein 1	4.5722	5.68501	20.0131	7.559	6.00881	8.27327	7.3044	5.4725	6.80857	8.05522	10.3822	13.4829	7.73668	11.5805	5.55043	24.8333	9.50886
EHD2	EH domain-containing protein 2	28.8619	34.8202	25.8175	22.4732	17.2024	17.8722	15.1944	29.7362	19.6452	35.3409	38.3522	24.739	25.6068	31.3565	19.7391	73.4235	60.2321
EHD4	EH domain-containing protein 4	0	8.23628	19.6207	0	5.46247	3.56186	0	7.53331	5.21502	13.7714	10.9343	8.46997	4.24771	18.1814	4.62516	10.9631	13.1531
EI24	Etoposide-induced protein 2.4 homolog;Isoform of O14681, Isoform 2 of Etoposide-induced protein 2.4 homolog	9.33094	3.1458	9.36299	9.90978	4.84606	0	11.3864	11.0328	4.13482	4.73126	16.7915	8.15421	3.85616	17.8126	3.87549	2.46113	4.16033
EIF1	Eukaryotic translation initiation factor 1	0	26.2078	24.7295	18.0911	12.26	16.0649	0	11.01	19.9139	12.2851	26.1632	9.09666	13.51	6.77684	23.5519	13.2689	23.1381
EIF1AD	Probable RNA-binding protein EIF1AD	0	4.71771	0	0	0	0	0	0	0	0	0	0	0	0	0	0	0
EIF1AX	Eukaryotic translation initiation factor 1A, X-chromosomal	29.7184	37.4654	22.1419	11.4173	11.4417	20.2478	13.8575	18.7666	15.5438	30.3723	15.1946	25.9885	18.4907	11.8666	36.2182	31.9915	54.1662
EIF1AY	Eukaryotic translation initiation factor 1A, Y-chromosomal	0	0	0	0	0	0	0	25.8575	0	0	0	0	0	0	0	14.9704	31.9395
EIF1B	Eukaryotic translation initiation factor 1b	0	0	0	0	0	0	0	0	1.41696	0	0	0	1.53234	0	2.25905	0	1.77349
EIF2A	Eukaryotic translation initiation factor 2A	14.7817	23.7865	23.271	11.5922	7.0435	13.2214	5.12489	11.9698	5.9232	9.75387	10.4879	18.3182	8.87472	4.26803	18.9072	38.3385	23.8687
EIF2AK2	Interferon-induced, double-stranded RNA-activated protein kinase	0	2.58959	0	0	0	1.59506	0	0	0	0	0	0	0	0	2.69418	6.11554	5.31531
EIF2B1	Translation initiation factor eIF-2B subunit alpha	0	3.83646	0	0	9.2361	0	0	0	0	0	0	0	0	0	6.66541	14.7481	8.65622
EIF2B2	Translation initiation factor eIF-2B subunit beta	0	30.8483	0	49.678	0	0	20.1226	0	0	0	0	0	33.0411	0	32.9175	0	0
EIF2B3	Translation initiation factor eIF-2B subunit gamma	20.7551	7.97868	6.56167	13.1693	2.89593	5.52939	0	16.2999	5.52785	0	0	11.9037	5.6618	29.0688	4.43227	13.1019	8.00439
EIF2B4	Isoform of Q9UI10, Isoform 2 of Translation initiation factor eIF-2B subunit delta;Isoform of Q9UI10, Isoform 3 of Translation initiation factor eIF-2B subunit delta	9.7617	13.4101	16.07	9.6109	23.7077	15.8044	3.60815	5.07792	5.80038	6.11614	0	9.78547	14.9505	0	11.6661	86.5037	8.35465
EIF2B5	Translation initiation factor eIF-2B subunit epsilon	0	15.55	46.5709	0	9.47739	36.5323	0	0	3.44791	0	0	0	13.7485	0	47.3725	9.18406	7.76298
EIF2D	Eukaryotic translation initiation factor 2D	0	2.05935	1.86945	0	0	0.925289	0	0	0	0	0	1.66679	0	0	1.42078	0	4.25822
EIF2S1	Eukaryotic translation initiation factor 2 subunit 1	36.2181	28.7628	33.8076	34.5752	12.2205	15.0757	20.5345	30.7033	11.737	27.8213	16.7645	28.7662	15.7201	26.2862	12.7534	24.925	23.8907
EIF2S2	Eukaryotic translation initiation factor 2 subunit 2	92.4539	113.405	110.896	38.8387	41.9265	70.255	51.4973	67.4195	28.864	41.3883	0	85.9967	35.5922	22.2396	83.3924	110.214	91.165
EIF2S3	Eukaryotic translation initiation factor 2 subunit 3	114.058	165.589	134.034	38.0596	28.8529	69.5468	37.3237	63.8243	17.683	16.6026	40.8404	94.0117	12.3724	20.2128	107.876	104.553	100.053
EIF3A	Eukaryotic translation initiation factor 3 subunit A	35.8695	37.2847	30.0272	30.7018	28.6542	23.7617	15.3139	24.882	17.9249	24.6761	19.6422	26.6982	14.5296	20.4704	21.3957	22.0513	31.3854
EIF3B	Eukaryotic translation initiation factor 3 subunit B;Isoform of P55884, Isoform 2 of Eukaryotic translation initiation factor 3 subunit B	21.4796	32.6686	17.8819	16.5183	23.4471	17.5056	8.41559	16.4621	15.246	13.9212	9.03421	13.424	11.1984	15.7191	18.0147	79.5124	29.7734
EIF3C	Eukaryotic translation initiation factor 3 subunit C	204.468	297.119	251.429	50.103	41.9748	127.784	71.5953	137.621	34.4553	34.2434	20.3278	188.054	57.2209	20.6789	205.886	175.039	252.364
EIF3D	Eukaryotic translation initiation factor 3 subunit D;Isoform of O15371, Isoform 2 of Eukaryotic translation initiation factor 3 subunit D;Isoform of O15371, Isoform 3 of Eukaryotic trans	0	0	0	0	0	22.2575	0	0	0	0	0	0	0	0	0	0	0
EIF3E	Eukaryotic translation initiation factor 3 subunit E	34.1056	23.2879	29.1685	29.5913	15.0518	15.5302	25.1064	29.6678	11.5653	30.5476	25.0952	34.6882	18.9433	28.5317	17.4593	31.8812	23.6989
EIF3F	Eukaryotic translation initiation factor 3 subunit F	21.5737	13.223	18.6859	24.8121	5.62586	5.71712	12.4677	20.6246	6.05559	11.7565	20.4075	14.3543	8.59121	16.3203	7.30847	15.2558	12.2413
EIF3G	Eukaryotic translation initiation factor 3 subunit G	31.6028	18.7859	20.4416	15.2779	6.44153	7.58189	9.74731	33.8599	7.81729	9.63335	23.4094	15.0343	3.4774	14.653	5.89966	10.9404	15.333
EIF3H	Eukaryotic translation initiation factor 3 subunit H	25.6995	23.6119	31.5366	18.948	12.0778	12.9562	21.9626	42.5682	15.7346	20.7051	24.6542	31.914	9.98975	24.464	14.85	34.5887	24.318
EIF3I	Eukaryotic translation initiation factor 3 subunit I	44.2512	24.7133	40.8615	44.6133	17.0958	13.7176	36.0732	34.0162	14.4396	40.1215	24.9741	28.1437	13.0694	52.6778	13.0385	36.9432	14.0484
EIF3J	Eukaryotic translation initiation factor 3 subunit J	54.1783	61.9343	44.0874	18.1955	23.916	45.2561	10.1364	31.0303	28.9372	20.8822	12.6296	27.4272	37.3211	17.0266	49.173	49.8465	57.2174
EIF3K	Eukaryotic translation initiation factor 3 subunit K;Isoform of Q9UBQ5, Isoform 2 of Eukaryotic translation initiation factor 3 subunit K	6.95065	9.89534	6.83777	4.59583	8.6694	6.58836	5.7489	9.15558	7.00094	14.6277	6.42229	9.00704	12.0769	5.32142	8.03946	19.5585	16.0964
EIF3L	Eukaryotic translation initiation factor 3 subunit L	62.3771	42.6806	79.7471	48.1132	45.9715	44.7896	58.4904	50.7909	32.9273	65.5205	35.505	79.5027	57.8036	81.8516	41.4311	75.3242	50.3765
EIF3M	Eukaryotic translation initiation factor 3 subunit M	9.95693	5.32514	11.6981	5.36123	3.59243	2.5315	3.95353	8.87331	3.24158	5.03242	6.71259	6.76989	5.15768	9.58798	3.31609	8.59874	6.31725
EIF4A1	Eukaryotic initiation factor 4A-I	33.7773	40.7222	45.3852	44.7161	29.6612	27.163	39.8919	51.9022	23.8702	76.3092	54.9022	46.3428	42.4477	90.0798	22.9206	61.3953	43.7148
EIF4A2	Eukaryotic initiation factor 4A-II;Isoform of Q14240, Isoform 2 of Eukaryotic initiation factor 4A-II	0	11.9435	15.9043	23.3004	16.5687	14.5773	42.9027	18.9315	12.822	11.2093	0	0	19.9184	10.364	13.0806	25.4586	14.7071
EIF4A3	Eukaryotic initiation factor 4A-III	11.9626	11.006	8.14169	6.89547	5.39621	4.75968	8.06278	10.5751	5.82313	13.746	11.5316	11.1913	6.86522	14.1621	6.20478	13.2597	13.8175
EIF4B	Eukaryotic translation initiation factor 4B	124.545	182.445	125.174	26.1195	31.4043	42.3231	7.63457	14.1705	6.17385	14.4038	0	15.268	6.95112	0	2.36117	7.80072	4.58383
EIF4E	Eukaryotic translation initiation factor 4E;Isoform of P06730, Isoform 2 of Eukaryotic translation initiation factor 4E	11.1256	8.19089	11.0335	7.45528	3.10949	5.49259	5.43732	11.7757	3.41866	4.55383	4.77518	5.70272	6.62147	7.39311	1.58974	5.79075	6.11545
EIF4E2	Eukaryotic translation initiation factor 4E type 2;Isoform of O60573, Isoform 2 of Eukaryotic translation initiation factor 4E type 2	0	2.1049	2.1049	2.1049	1.03798	0	0	0	0	0	0	0	1.58948	0	0	0	0
EIF4E3	Eukaryotic translation initiation factor 4E type 3	0	0.966565	0.691058	0	1.8403	0	0	0	0.53451	0.890589	0	0	1.04726	0	0	1.66163	0
EIF4ENIF1	Eukaryotic translation initiation factor 4E transporter;Isoform of Q9NRA8, Isoform 3 of Eukaryotic translation initiation factor 4E transporter	0	0	0	0	0	0	0	0	0	0	0	0	0	0	0	3.66383	0
EIF4G1	Isoform of Q04637, Isoform 8 of Eukaryotic translation initiation factor 4 gamma 1	23.874	15.4288	23.573	40.8192	13.5859	12.9861	17.6516	21.8115	5.7937	13.3622	17.4981	12.7052	9.86403	13.8206	7.41356	32.9409	13.5185
EIF4G2	Eukaryotic translation initiation factor 4 gamma 2	32.0572	7.19003	18.1516	39.9728	10.8116	12.6554	36.7777	32.1208	8.5066	26.0422	57.9549	16.3336	9.7399	17.866	8.35462	27.1916	11.6045
EIF4H	Eukaryotic translation initiation factor 4H;Isoform of Q15056, Isoform Short of Eukaryotic translation initiation factor 4H	0	13.0506	5.05027	14.4799	11.6624	8.67516	3.53333	8.7234	7.59375	8.09985	12.0584	4.91	11.483	7.95659	4.87558	10.3857	10.3975
EIF5	Eukaryotic translation initiation factor 5	168.238	4.90943	14.4416	0	4.78508	5.08953	0	6.84362	5.22223	9.68673	8.05917	3.93715	6.71513	6.09154	2.86964	3.23992	2.64562
EIF5A	Eukaryotic translation initiation factor 5A-1;Isoform of P63241, Isoform 2 of Eukaryotic translation initiation factor 5A-1	45.6169	25.771	32.2712	34.0694	15.2016	20.8294	15.7175	34.9531	12.9526	23.0663	20.3044	24.665	22.5348	23.7808	21.985	28.8759	27.8374
EIF5B	Eukaryotic translation initiation factor 5B	122.497	182.949	193.381	102.888	306.894	235.113	90.6953	122.092	200.473	251.349	54.3238	141.9	311.139	185.194	202.128	1304.77	140.549
EIF6	Eukaryotic translation initiation factor 6	19.9952	0	0	0	4.43802	0	0	0	0	0	0	0	8.21211	0	0	6.80041	0
EIPR1	EARP and GARP complex-interacting protein 1	0	0	0	0	0	17.3851	0	0	8.64084	0	0	0	0	0	17.9402	0	0
ELAC2	Zinc phosphodiesterase ELAC protein 2;Isoform of Q9BQ52, Isoform 4 of Zinc phosphodiesterase ELAC protein 2	1.97617	3.84708	0	0	1.09695	0	0	0	0	0	0	3.64739	1.29317	3.23838	0.855119	0	0
ELANE	Neutrophil elastase	0	0	0	0	3.7033	0	0	0	0	16.6486	0	101.878	0	0	0	0	0
ELAVL1	ELAV-like protein 1;Isoform of Q15717, Isoform 2 of ELAV-like protein 1	15.7916	11.8777	14.362	0	5.60259	7.18253	6.9117	0	4.60422	0	0	10.8338	5.92181	0	0	6.6502	6.69311
ELMO1	Engulfment and cell motility protein 1	0	0	0	0	0	0	0	0	0	0	0	0	0	0	0	0	1.86736
ELN	Isoform of P15502, Isoform 1 of Elastin;Isoform of P15502, Isoform 2 of Elastin;Isoform of P15502, Isoform 4 of Elastin	0	1.9034	3.49152	9.65526	3.50824	6.71085	16.7142	8.85902	9.53139	13.8573	22.6616	13.1064	7.39528	19.3164	0	25.5938	0
ELOA	Elongin-A	0	8.69423	8.69423	21.8054	6.16863	2.59046	0	0	0	0	0	4.80266	5.41321	0	3.91946	15.9197	0
ELOB	Elongin-B;Isoform of Q15370, Isoform 2 of Elongin-B	19.6031	13.8271	19.7704	22.1648	11.3943	8.64325	7.96498	13.6391	7.42431	16.4846	14.6551	6.96277	13.6475	21.9597	6.43171	10.4048	7.68119
ELOC	Elongin-C	10.9075	52.1232	42.6987	68.3068	33.2421	42.3133	33.3261	38.8585	22.5401	23.0503	54.3864	22.1198	44.0306	26.3104	32.1238	34.8927	41.8917
ELP1	Elongator complex protein 1	5.85633	9.67901	8.53522	0	11.4548	7.46926	4.72699	12.6295	5.05541	12.867	0	9.40333	8.42858	8.91102	7.185	14.3362	7.47357
ELP3	Elongator complex protein 3	6.18622	8.59668	12.7589	2.12649	7.8359	7.24398	3.4537	8.44862	6.43215	8.13724	3.51472	7.40256	7.43797	8.93362	5.14904	10.0887	5.61343
EMC1	ER membrane protein complex subunit 1;Isoform of Q8N766, Isoform 2 of ER membrane protein complex subunit 1	41.959	16.3693	30.4519	47.083	7.98709	12.3276	36.71	52.7698	15.684	34.4173	60.8261	21.6064	13.2634	50.8894	15.8536	21.7338	23.3092
EMC2	ER membrane protein complex subunit 2	136.435	103.856	69.074	65.4884	88.8155	60.3083	63.5455	71.3486	75.5886	53.5645	0	61.8275	53.0829	65.9975	94.9569	120.986	87.9687
EMC3	ER membrane protein complex subunit 3	28.5381	7.12904	18.2564	40.3612	5.24794	11.0784	24.8076	37.4961	11.5813	27.1192	49.4869	15.8373	10.1942	49.5253	15.8755	19.3613	22.5076
EMC4	ER membrane protein complex subunit 4	66.4088	4.16036	14.1128	21.7002	2.56383	2.40534	17.5019	27.7898	7.98282	17.7328	29.7297	6.97239	3.97974	28.558	4.3604	6.19348	5.8308
EMC6	ER membrane protein complex subunit 6	19.6755	0	19.1432	25.8443	0	12.6905	18.8879	23.7184	11.1521	23.0238	32.5155	0	0	31.705	0	0	0
EMC7	ER membrane protein complex subunit 7	26.6088	20.765	19.8433	87.2297	6.7389	7.2024	30.9874	54.3233	13.8343	22.3912	36.0737	17.1902	18.4185	34.6439	17.7267	23.4658	25.6111
EMC8	ER membrane protein complex subunit 8	11.8475	8.36625	18.0932	8.36625	3.40399	3.31877	16.83	0	2.71929	9.35572	0	13.252	9.36601	0	13.2656	8.01189	6.29547
EMC9	ER membrane protein complex subunit 9	0	3.71733	0	0	0	0	15.7284	25.8277	2.90172	0	0	0	0	0	0	0	4.24159
EMD	Emerin	34.0506	9.98001	23.9229	33.3322	7.78196	17.115	36.3735	45.257	10.0683	37.6164	53.7638	21.5368	15.5258	21.0149	9.36972	20.9766	17.8332
EMILIN1	EMILIN-1	47.3288	6.35815	8.13232	9.65082	7.76048	7.54879	11.6919	11.9065	4.43666	11.3182	22.6043	14.3675	7.71178	19.3432	2.66579	15.938	8.81309
EML1	Echinoderm microtubule-associated protein-like 1;Isoform of O00423, Isoform 3 of Echinoderm microtubule-associated protein-like 1	18.2905	23.197	15.4033	17.1975	12.4793	12.1752	5.18543	11.7243	7.94431	9.20401	29.3691	9.39684	10.7363	11.7011	8.82321	34.6286	12.3063
EML3	Echinoderm microtubule-associated protein-like 3	10.91	0	4.75023	3.01831	6.10364	4.48412	11.1837	8.35383	0	0	0	3.40159	6.36436	0	4.10324	0	0
ENDOD1	Endonuclease domain-containing 1 protein	321.015	31.8516	93.4576	175.414	21.384	16.4808	112.508	148.554	14.533	90.0072	268.776	46.2042	16.9924	135.777	19.8165	14.4422	23.1381
ENDOG	Endonuclease G, mitochondrial	15.7226	29.6846	19.675	33.5633	14.8967	12.3902	6.20704	24.3885	12.0242	18.2758	25.456	10.6459	10.7958	36.2767	19.7664	36.7904	18.977
ENGASE	Cytosolic endo-beta-N-acetylglucosaminidase	0	0	0	0	0	0	0	0	0	1.11938	0	0	0	0	0	1.01469	1.36845
ENO1	Alpha-enolase	384.791	343.899	407.769	456.945	168.534	195.559	277.386	346.008	174.003	259.225	326.58	260.125	233.375	376.034	169.718	564.202	295.276
ENO1	Isoform of P06733, Phosphopyruvate hydratase	274.047	283.355	240.5	287.517	150.103	183.56	234.361	268.031	142.678	236.743	267.418	219.524	219.864	300.35	179.815	263.351	306.498
ENO2	Gamma-enolase	0	0	0	0	8.5603	0	0	0	0	0	0	0	0	0	0	0	0
ENO3	Beta-enolase	624.059	782.044	706.829	1125.29	614.029	359.813	544.86	608.675	335.163	644.877	644.451	467.5	1056.22	965.667	311.477	710.616	492.979
ENOPH1	Enolase-phosphatase E1	0	349.97	349.97	349.97	0	0	0	0	0	0	0	0	2.82979	0	355.735	0	0
ENPP4	Bis(5'-adenosyl)-triphosphatase ENPP4	0	0	0	0	0	0	0	0	0	0	0	0	1.93533	0	0	0	0
ENSA	Alpha-endosulfine;Isoform of O43768, Isoform 3 of Alpha-endosulfine	0	0	0	0	0	0	0	0	0	0	0	0	2.33805	0	0	0	0
ENTPD2	Ectonucleoside triphosphate diphosphohydrolase 2	0	21.5343	50.8879	197.954	0	0	33.2724	0	10.7909	0	0	0	14.9746	67.0544	14.257	0	0
ENY2	Transcription and mRNA export factor ENY2;Isoform of Q9NPA8, Isoform 2 of Transcription and mRNA export factor ENY2	14.3657	16.5094	8.77434	8.53619	19.2304	15.1802	6.05738	8.78994	14.1077	16.1874	4.4156	8.71328	23.2785	10.4334	12.8922	0	15.2135
EOGT	EGF domain-specific O-linked N-acetylglucosamine transferase	0	8.53947	8.53947	8.53947	9.68699	4.32591	12.2316	0	6.58501	15.3206	0	16.2062	12.5561	24.1061	6.92511	16.3544	8.89464
EPB41	Protein 4.1;Isoform of P11171, Isoform 2 of Protein 4.1;Isoform of P11171, Isoform 3 of Protein 4.1;Isoform of P11171, Isoform 4 of Protein 4.1	17.6127	14.221	21.8381	18.3977	9.06544	9.37945	0	33.2495	27.0431	32.4771	0	42.0515	10.2933	37.4738	15.7989	15.2347	19.0427
EPB41L1	Isoform of Q9H4G0, Isoform 2 of Band 4.1-like protein 1	59.255	0	0	0	0	0	0	0	0	0	0	0	0	0	0	0	0
EPB41L2	Band 4.1-like protein 2	0	8.50023	8.50023	8.50023	0	35.2028	43.4895	0	0	122.342	0	6.18845	0	0	62.6652	28.4272	31.494
EPB42	Isoform of P16452, Isoform Long of Protein 4.2	0	10.6299	0	0	5.97295	0	0	0	0	5.23332	0	14.2653	8.80754	15.5284	3.64692	3.57548	3.8925
EPDR1	Mammalian ependymin-related protein 1	0	22.3373	9.14565	0	13.3349	14.0857	0	18.9621	18.2036	22.0383	24.5183	15.2294	12.9854	13.9036	9.48477	41.6519	18.4132
EPHX1	Epoxide hydrolase 1	319.172	109.504	85.5096	108.359	50.3372	28.4104	33.4954	90.7373	21.6948	120.192	31.1021	39.5897	37.1667	90.329	30.6709	89.7294	28.3549
EPHX2	Bifunctional epoxide hydrolase 2	0	8.3547	3.35672	8.3547	6.86734	3.14541	0	0	1.66478	2.44837	0	2.79178	6.91918	0	1.19489	5.12312	2.3433
EPM2A	Isoform of B3EWF7, Laforin	102.689	78.3846	67.3619	71.05	38.7069	30.7735	40.8305	67.4972	27.756	46.5991	64.5045	62.07	35.7729	40.0707	28.8023	33.0396	50.0297
EPM2AIP1	EPM2A-interacting protein 1	0	0	0	0	0	0	0	0	0	0	0	0	0	0	0	3.18079	0
EPN2	Epsin-2;Isoform of O95208, Isoform 2 of Epsin-2	0	0	0	0	0	0	0	5.67787	0	0	0	0	0	0	0	0	0
EPRS1	Bifunctional glutamate/proline--tRNA ligase	31.6683	20.2783	38.9327	39.9452	21.4037	18.4577	24.0649	26.9331	11.5759	26.2287	24.0099	20.691	21.615	26.9791	16.4447	22.026	16.294
EPS15L1	Isoform of Q9UBC2, Isoform 2 of Epidermal growth factor receptor substrate 15-like 1	0	4.04698	2.56752	0	2.99632	0	4.82597	0	0	0	0	1.31275	2.69621	0	0	2.29316	0
EPX	Eosinophil peroxidase	8.68611	0	0	0	4.51636	3.90641	0	6.90376	2.94412	9.52088	0	3.69557	4.66074	5.60051	8.14004	4.19793	3.97034
ERAP1	Isoform of Q9NZ08, Isoform 2 of Endoplasmic reticulum aminopeptidase 1	0	6.00386	2.1087	8.68289	4.29822	0	0	0	0	0	0	0	5.67877	0	0	5.79475	3.2789
ERAP2	Endoplasmic reticulum aminopeptidase 2;Isoform of Q6P179, Isoform 3 of Endoplasmic reticulum aminopeptidase 2	0	1.09807	0	0	0	0	0	0	0	0	0	0	0	0	0	0	0
ERC1	ELKS/Rab6-interacting/CAST family member 1	0	12.1683	12.1683	12.1683	0	0	0	0	0	0	0	0	0	0	0	9.14608	0
ERG28	Ergosterol biosynthetic protein 28 homolog	0	0	0	58.7035	0	0	0	31.0517	0	11.1475	0	24.293	0	0	0	0	0
ERGIC1	Endoplasmic reticulum-Golgi intermediate compartment protein 1;Isoform of Q969X5, Isoform 2 of Endoplasmic reticulum-Golgi intermediate compartment protein 1	20.7217	8.86402	10.4885	39.3065	4.5634	3.98361	15.3386	32.5526	2.67952	18.4492	16.5955	11.8163	7.35961	17.2356	1.55893	25.7653	5.09012
ERGIC3	Endoplasmic reticulum-Golgi intermediate compartment protein 3;Isoform of Q9Y282, Isoform 3 of Endoplasmic reticulum-Golgi intermediate compartment protein 3	4.18143	0	0	0	0	0	0	0	0	6.33253	0	0	0	0	0	1.4419	0
ERI3	ERI1 exoribonuclease 3	21.4994	12.8479	22.7832	31.5184	10.0853	8.46988	16.5724	28.3391	7.56931	17.2893	0	13.4487	9.84588	19.1217	6.05099	10.3237	8.73229
ERLIN1	Erlin-1	18.0478	0	13.5461	22.3596	0	0	17.5624	17.1785	4.12341	9.43794	28.7204	10.9643	8.15182	17.9733	22.1119	10.1867	0
ERLIN2	Erlin-2	181.145	59.7078	136.935	254.721	26.5026	40.9711	273.706	203.182	41.2056	84.5624	411.804	93.666	54.8346	199.08	40.7405	57.2315	57.84
ERMP1	Endoplasmic reticulum metallopeptidase 1	13.2229	0	6.24618	13.5165	0	0	15.5305	9.37315	3.31785	13.7619	16.2589	4.71066	2.39141	19.7028	0	5.42169	2.35195
ERO1A	ERO1-like protein alpha	0	15.0187	9.12042	0	19.1553	0	6.66016	0	0	29.2939	0	0	19.0263	0	3.09191	8.01004	12.216
ERP29	Endoplasmic reticulum resident protein 29	26.9852	0	0	0	2.7707	2.34141	0	0	0	3.40469	0	0	5.26689	10.3616	3.99141	10.5909	0
ESAM	Endothelial cell-selective adhesion molecule	0	0	0	0	0	37.1601	0	0	0	0	0	0	0	0	0	0	0
ESD	S-formylglutathione hydrolase	39.8497	369.94	145.987	69.8818	146.45	116.085	33.8754	100.458	83.9182	46.9221	53.6896	80.7015	191.494	61.4791	132.229	100.331	174.072
ESF1	ESF1 homolog	0	1.47445	1.47445	1.47445	3.14912	2.19825	0	0	0	0	0	0	4.3207	0	0	10.2385	1.09857
ESYT1	Isoform of Q9BSJ8, Isoform 2 of Extended synaptotagmin-1	34.082	6.37574	12.6799	26.4219	3.78869	2.78533	12.3249	22.6979	5.19465	6.60507	19.4263	9.21896	5.65529	21.4056	184.853	8.12896	4.37954
ESYT2	Isoform of A0FGR8, Isoform 2 of Extended synaptotagmin-2	114.347	5.26418	9.17518	24.5903	4.87291	16.8996	15.3068	21.3789	0	8.04595	18.437	9.92617	7.51717	21.268	5.81335	15.6652	5.65885
ETF1	Eukaryotic peptide chain release factor subunit 1	8.88844	11.8204	16.2673	12.0217	4.27946	5.007	6.06855	10.4565	3.09141	9.24224	19.6332	11.5447	4.80568	8.7928	4.65507	9.76866	10.6274
ETFA	Electron transfer flavoprotein subunit alpha, mitochondrial	29.1491	48.1871	19.13	31.5111	29.0395	23.0875	16.645	36.8541	20.5805	89.945	34.5454	26.2532	56.306	25.854	28.0948	63.4067	36.1101
ETFB	Electron transfer flavoprotein subunit beta	9.87246	35.8039	13.0953	13.1542	23.0244	14.9754	6.82943	12.3108	16.8522	27.0693	41.8784	16.4052	43.5567	14.1719	18.9639	80.8788	10.4143
ETFDH	Electron transfer flavoprotein-ubiquinone oxidoreductase, mitochondrial	69.7952	41.7379	34.6509	53.2555	21.9932	14.2718	4.9749	20.0995	4.30186	15.5302	12.1644	13.486	23.2463	6.39039	8.06913	25.5056	21.5987
ETFRF1	Electron transfer flavoprotein regulatory factor 1	21.7884	33.8634	20.645	14.2615	58.5314	37.2372	8.77778	13.7748	14.3204	35.4386	0	20.8777	49.6083	16.2977	30.9832	12.1965	18.6392
ETHE1	Persulfide dioxygenase ETHE1, mitochondrial	0	4.3715	0	0	0	0	0	0	0	0	0	7.01103	5.25841	0	0	0	0
EWSR1	RNA-binding protein EWS;Isoform of Q01844, Isoform 3 of RNA-binding protein EWS;Isoform of Q01844, Isoform 5 of RNA-binding protein EWS;Isoform of Q01844, Isoform 6 of RNA-binding pr	0	0	0	0	0	8.31337	0	0	0	0	0	0	0	0	0	0	0
EXD3	Exonuclease mut-7 homolog	0	0	0	0	0	2.00899	0	0	0	0	0	0	0	0	0	0	0
EXOC2	Exocyst complex component 2	0	0	72.2129	118.294	0	0	0	150.413	0	129.98	152.226	67.6834	0	109.377	0	0	0
EXOC3	Exocyst complex component 3	14.3988	0	0	0	0	0	0	0	0	0	0	0	0	0	0	0	0
EXOC4	Exocyst complex component 4	8.11756	4.35743	10.6344	11.4068	7.68403	3.68449	15.1037	12.9505	2.1089	7.52796	14.7398	4.44203	7.27034	14.149	3.01875	19.3257	7.12407
EXOC5	Exocyst complex component 5	0	6.9013	6.9013	6.9013	0	0	0	0	0	0	0	10.5459	0	0	0	0	0
EXOC6B	Exocyst complex component 6B	0	0.83952	0	0	0	0	0	0	0	0	0	1.25482	0	0	0.595562	0.865236	0.9035
EXOC8	Exocyst complex component 8	0	4.37654	4.37654	4.37654	0	0	0	0	0	0	0	0	0	0	0	0	0
EXOSC10	Exosome component 10;Isoform of Q01780, Isoform 2 of Exosome component 10	0	9.72145	9.72145	9.72145	4.02707	7.10849	0	0	0	0	0	0	0	0	0	0	7.78266
EXOSC6	Exosome complex component MTR3	0	3.31613	0	0	0	0	0	0	5.94369	0	0	0	0	0	0	2.1406	6.64704
EXOSC8	Exosome complex component RRP43	0	0	0	0	0	0	0	0	0	0	0	0	0	0	0	0.412986	0
EXOSC9	Exosome complex component RRP45;Isoform of Q06265, Isoform 2 of Exosome complex component RRP45	0	0	0	0	0	0	0	0	0	0	0	0	0	0	0	5.24608	2.80368
EYA3	Eyes absent homolog 3;Isoform of Q99504, Isoform 4 of Eyes absent homolog 3;Isoform of Q99504, Isoform 5 of Eyes absent homolog 3	0	176.535	221.164	2191.61	116.062	60.9786	0	356.439	115.653	60.6704	477.518	9.86238	83.206	0	57.3887	88.0308	0
EZR	Ezrin	0	0	0	0	0	0	0	0	0	0	0	0	0	0	0	23.1491	2.2255
F11	Coagulation factor XI	0	0	0	0	0	0	0	24.9911	0	0	23.5825	0	0	0	0	0	0
F12	Coagulation factor XII	18.0894	10.7853	8.18869	24.3537	8.79	7.19246	14.4173	20.9115	5.0624	3.97995	44.5544	11.1399	0	11.3822	5.27384	9.63906	7.80959
F13A1	Coagulation factor XIII A chain	0	10.8926	6.22895	0	8.10007	6.89568	8.08136	10.8289	8.92188	12.4388	6.68791	43.7605	10.3265	26.7749	26.0691	24.6	71.2571
F2	Prothrombin	16.1892	9.90446	56.0421	12.1749	7.29103	6.07543	15.9472	37.5825	4.6672	13.4796	33.9149	17.0248	5.86212	8.95421	7.53055	9.04346	10.9554
F5	Coagulation factor V	0	0	0	0	0	0	0	0	0	3.15121	0	0	0	8.03022	1.96982	0	0
F8A3	40-kDa huntingtin-associated protein	0	0	0	0	0	0	0	0	2.88573	0	0	0	0	0	0	8.35093	0
F9	Coagulation factor IX	0	0	0	0	0	0	0	0	8.96306	0	0	0	0	0	0	10.2928	7.5462
FAAH	Fatty-acid amide hydrolase 1	31.1692	6.1863	6.1863	2.90044	0	0	7.21414	5.8896	0	0	16.021	0	0	5.27506	0	0	0
FABP4	Fatty acid-binding protein, adipocyte	0	0	0	0	0	0	0	0	0	0	0	0	0	0	0	7.61965	0
FADS2	Acyl-CoA 6-desaturase	0	0	0	0	0	0	0	0	0	7.90273	0	0	0	0	0	0	0
FAF1	FAS-associated factor 1	21.8135	5.8389	5.8389	54.7097	0	1.75864	0	0	0	0	14.9448	0	2.02374	0	0	0	0
FAF2	FAS-associated factor 2	0	0	0	9.43114	0	0	7.10534	0	0	8.82221	17.5869	0	0	14.3195	0	0	0
FAHD1	Acylpyruvase FAHD1, mitochondrial	18.4512	12.0957	8.31026	19.3403	5.61939	13.2031	15.4769	11.5368	8.73084	7.62039	42.8046	13.5544	22.1235	3.67475	10.295	29.7122	7.54272
FAHD2A	Fumarylacetoacetate hydrolase domain-containing protein 2A	0	2.73357	0	4.17604	0	8.58376	0	0	6.16959	3.15775	3.20546	0	3.67244	0	0	5.87131	6.38011
FAM114A1	Protein NOXP20	0	32.3096	38.2485	32.3096	7.81608	34.6799	0	0	0	0	105.049	0	7.20368	29.0354	0	31.669	0
FAM114A2	Protein FAM114A2	0	45.8914	0	25.6073	24.8765	0	0	13.4365	0	0	0	0	8.46749	0	0	0	14.7818
FAM120A	Constitutive coactivator of PPAR-gamma-like protein 1;Isoform of Q9NZB2, Isoform F of Constitutive coactivator of PPAR-gamma-like protein 1	66.8999	24.1396	50.6891	57.2749	17.599	17.7778	10.6656	0	26.4032	18.28	85.8401	34.9045	24.4317	0	26.0032	41.0804	24.0618
FAM120B	Constitutive coactivator of peroxisome proliferator-activated receptor gamma	15.259	9.29033	24.4351	51.9594	3.46808	10.3867	0	0	0	0	0	14.9652	0	0	4.7899	8.15896	6.29982
FAM136A	Protein FAM136A	0	1.46329	0	0	0	1.84747	0	0	1.75775	0	0	2.25207	2.28589	0	0.912487	4.46617	1.58135
FAM162A	Protein FAM162A	2243.5	64.5106	148.599	152.85	42.8242	40.0846	83.8657	276.43	31.4309	285.152	147.737	69.4036	28.5992	232.985	44.8876	73.9154	69.459
FAM185A	Protein FAM185A	154.641	0	76.0877	178.264	0	0	150.829	184.071	0	48.27	187.495	80.2938	45.3476	106.103	0	0	0
FAM210A	Protein FAM210A	341.921	44.313	11.8772	34.7507	0	0	0	17.7699	43.2669	19.1548	0	6.36183	4.62759	18.4174	39.5664	12.628	107.629
FAM210B	Protein FAM210B, mitochondrial	0	0	0	0	0	1.84832	0	0	0	31.094	0	10.2301	3.18973	0	2.26009	13.9552	2.22858
FAM234A	Protein FAM234A	6.27661	0	0	0	0	0	0	0	0	0	0	0	0	0	0	0	0
FAM98A	Protein FAM98A	43.2838	34.1453	58.8186	28.646	22.8291	22.4738	30.8308	41.7913	17.126	37.6511	18.5691	45.5913	15.8655	44.1395	32.9251	28.5585	29.9798
FAM98B	Protein FAM98B	23.7753	18.5238	28.4783	11.0069	11.7406	14.497	35.7672	24.3605	7.32245	25.1696	8.56427	28.9389	15.7926	22.575	17.7185	22.2707	20.3858
FAP	Prolyl endopeptidase FAP	0	0	93.3716	0	0	1.6962	0	0	0	35.5613	0	0	0	0	0	0	0
FARP1	FERM, ARHGEF and pleckstrin domain-containing protein 1;Isoform of Q9Y4F1, Isoform 2 of FERM, ARHGEF and pleckstrin domain-containing protein 1	0	0	0	0	25.7151	3.72287	0	0	0	6.44581	0	0	0	0	0	24.04	6.81441
FARS2	Phenylalanine--tRNA ligase, mitochondrial	0	0	0	0	1.32553	0	0	0	0	0	0	0	0	0	2.39346	0	0
FARSA	Phenylalanine--tRNA ligase alpha subunit	57.3489	50.2494	35.2221	44.1737	35.5458	41.8868	30.1984	42.0422	30.6377	29.6672	41.0384	37.2977	39.044	29.1895	38.5857	88.0714	51.5856
FARSB	Phenylalanine--tRNA ligase beta subunit	28.5644	24.965	24.7636	19.5103	17.6234	16.7139	21.2513	25.2514	17.3523	45.3395	24.2209	37.152	17.008	41.0324	15.7444	54.706	27.684
FASN	Fatty acid synthase	0	0	0	80.2535	0	8.72926	0	0	0	12.1305	0	0	0	58.2676	0	0	0
FASTKD2	FAST kinase domain-containing protein 2, mitochondrial	6.63782	3.43266	11.34	7.06585	1.71273	1.90712	0	0	0	5.87053	13.4026	0	2.2354	6.14649	2.52305	3.70199	0
FASTKD5	FAST kinase domain-containing protein 5, mitochondrial	0	2.46678	0	0	0	0	0	0	0	0	0	0	0	0	0	0	0
FAT3	Protocadherin Fat 3;Isoform of Q8TDW7, Isoform 3 of Protocadherin Fat 3	425.036	0	0	0	0	0	0	0	0	0	0	0	0	0	0	0	0
FAU	FAU ubiquitin-like and ribosomal protein S30	96.6552	115.779	68.7883	74.897	120.306	229.022	121.558	164.887	112.682	344.649	145.945	211.146	96.7508	116.099	347.238	326.99	278.951
FBL	rRNA 2'-O-methyltransferase fibrillarin	42.7096	26.5785	41.1732	34.615	27.4719	29.6468	39.5808	52.928	26.9064	96.2669	46.2477	53.3681	31.7289	72.565	30.7275	101.493	52.5567
FBLN1	Fibulin-1	37.4563	2.93313	5.78382	0	1.0471	0	4.24116	12.2063	1.89346	9.22523	0	7.66094	3.91791	9.84073	1.81103	5.31661	4.85991
FBLN2	Isoform of P98095, Isoform 2 of Fibulin-2	40.5439	24.7076	21.9895	26.6418	9.4295	8.19554	43.8313	63.2828	16.6478	52.6596	85.1119	24.6083	19.0658	31.9247	8.55513	26.5176	35.9111
FBLN5	Fibulin-5	66.7614	39.4667	25.323	53.959	3.90381	4.18868	18.6975	23.2587	5.06473	19.4436	27.1951	18.5217	4.91309	20.0229	7.3287	11.6154	61.7345
FBN1	Fibrillin-1	567.708	26.4991	289.411	379.109	100.297	203.225	445.538	462.579	127.572	321.645	1099.49	720.248	102.366	449.497	29.0487	133.948	20.4658
FBN2	Fibrillin-2	191.216	0	265.103	258.145	31.5856	144.27	0	0	67.0743	191.813	1055.82	189.619	47.1145	346.36	0	34.3269	0
FBP2	Fructose-1,6-bisphosphatase isozyme 2	493.43	242.958	69.0581	51.3646	43.9733	16.9737	4.51424	42.8929	17.683	8.34598	21.0907	15.8009	59.5874	18.9464	25.2073	15.7737	57.7335
FBXL19	F-box/LRR-repeat protein 19;Isoform of Q6PCT2, Isoform 2 of F-box/LRR-repeat protein 19	16.1408	16.5894	17.9149	16.5894	16.9781	17.1821	0	0	0	6.62487	0	5.65174	4.59361	0	1.69913	0	1.85964
FBXO21	F-box only protein 21;Isoform of O94952, Isoform 2 of F-box only protein 21	3.75773	2.22347	0	1.61869	3.4442	2.2955	0	0	1.8444	2.16759	0	0	5.05888	2.00506	2.16934	2.60576	1.46025
FBXO22	F-box only protein 22	0	2.10102	2.10102	2.10102	0	0	0	0	0	0	0	0	0	0	0	3.80395	0
FBXO3	F-box only protein 3	5.31649	6.78627	6.00917	0	7.7587	3.92082	2.88327	3.74702	4.45714	4.56854	0	4.34492	5.78701	4.85095	3.67389	5.78675	5.04462
FBXO30	F-box only protein 30	0	0	0	0	0	0	0	0	0	0	0	0	0	0	0	0	0.801361
FBXO40	F-box only protein 40	5.84824	0	0	0	0	1.41768	0	0	0	6.82932	0	0	0	0	1.31773	0	0
FBXO42	F-box only protein 42	0	0.732371	0	0	0.480827	6.9323	0	0	6.66279	0	0	0	8.73483	0	0	0	0
FBXO44	F-box only protein 44;Isoform of Q9H4M3, Isoform 2 of F-box only protein 44	1.09578	1.81314	1.81314	3.58727	1.05121	1.18625	1.08564	0	0	0	0	1.42161	2.04246	0	1.14453	0.788923	1.02289
FBXO7	F-box only protein 7	0	0	0	0	0	0	0	0	0	0	0	0	0	26.8242	0	0	0
FCGBP	IgGFc-binding protein	0	18.678	9.17096	21.7853	0	10.658	23.8388	0	11.6053	11.4624	30.6613	16.8571	11.0473	15.1331	11.3744	12.3719	9.31168
FCHO2	F-BAR domain only protein 2	0	0	0	0	0	5.97417	0	0	0	0	0	0	0	0	0	0	0
FCSK	L-fucose kinase;Isoform of Q8N0W3, Isoform 2 of L-fucose kinase	0	3.10693	0	11.1626	0	4.15506	0	12.7816	0	21.163	0	0	3.8349	0	0	7.35588	0
FDFT1	Squalene synthase	0	0	0	0	0	0	0	0	0	0	0	0	0	0	18.855	0	0
FDPS	Farnesyl pyrophosphate synthase;Isoform of P14324, Isoform 2 of Farnesyl pyrophosphate synthase	0	11.938	0	0	5.05928	0	0	0	0	0	0	0	6.98964	0	4.15649	0	4.74382
FECH	Ferrochelatase, mitochondrial;Isoform of P22830, Isoform 2 of Ferrochelatase, mitochondrial	32.2794	15.3473	18.7549	23.172	16.0025	16.4618	20.7484	33.4877	11.6938	28.0722	32.5454	17.2935	14.1924	21.98	15.2696	19.3792	19.4728
FEM1A	Protein fem-1 homolog A	15.7952	7.13725	10.1535	40.5475	4.18012	4.21286	18.8185	0	3.47661	15.7825	0	9.98578	8.05665	21.0633	4.60073	5.37446	6.85217
FEN1	Flap endonuclease 1	9.13325	10.3952	0	0	0	0	0	0	9.75565	0	0	0	0	0	3.91946	0	9.02045
FERMT2	Fermitin family homolog 2;Isoform of Q96AC1, Isoform 3 of Fermitin family homolog 2	14.8295	17.99	23.047	9.26967	9.71827	8.87927	13.9407	15.5412	7.91692	23.7453	0	17.0758	15.8801	19.4101	9.3611	22.5131	21.4797
FERMT3	Fermitin family homolog 3;Isoform of Q86UX7, Isoform 2 of Fermitin family homolog 3	0	5.00185	7.17818	23.9422	0	0	24.5971	0	0	0	20.5253	8.75753	0	0	0	1.69213	0
FGA	Fibrinogen alpha chain	59.652	18.6995	40.4683	100.638	52.9528	29.4495	75.0904	183.183	73.6472	264.714	118.875	566.216	93.768	146.631	34.5244	270.729	15.1995
FGB	Fibrinogen beta chain	25.1088	9.43476	18.7851	48.0246	32.121	18.8833	35.5864	103.845	40.7902	144.57	67.1104	320.835	59.9452	68.6795	19.3431	382.679	7.08481
FGD4	FYVE, RhoGEF and PH domain-containing protein 4	0	0	0	0	0	0	0	694.522	0	0	470.967	304.777	0	0	0	38.0045	6.36397
FGF2	Fibroblast growth factor 2;Isoform of P09038, Isoform 2 of Fibroblast growth factor 2;Isoform of P09038, Isoform 3 of Fibroblast growth factor 2;Isoform of P09038, Isoform 4 of Fibrob	0	0	0	0	0	3.07664	0	0	0	0	0	0	0	0	0	0	0
FGG	Fibrinogen gamma chain	28.5578	11.5513	28.6164	59.2331	41.7147	20.6005	46.557	115.794	53.4018	175.016	71.9101	346.802	67.3061	92.178	25.3937	307.28	11.5592
FGGY	FGGY carbohydrate kinase domain-containing protein;Isoform of Q96C11, Isoform 4 of FGGY carbohydrate kinase domain-containing protein	0	38.6128	0	0	0	0	0	0	0	0	0	0	51.3753	0	0	0	0.820594
FH	Fumarate hydratase, mitochondrial;Isoform of P07954, Isoform Cytoplasmic of Fumarate hydratase, mitochondrial	0	14.4854	23.7637	39.1529	43.741	4.49964	0	590.726	5.92866	17.1703	22.5834	8.1994	36.9789	8.45721	4.28674	30.5939	0.827996
FHIP1A	FHF complex subunit HOOK interacting protein 1A	0	0	0	0	0	0	0	30.1221	0	0	0	0	2.86124	0	0	0	0
FHL1	Isoform of Q13642, Isoform 5 of Four and a half LIM domains protein 1	1485	1813.56	1951.71	481.354	884.889	1188.44	862.352	1023.73	692.558	1886.59	704.028	1271.11	992.326	806.357	1141.37	383.032	1792.37
FHL2	Four and a half LIM domains protein 2	0	0	0	0	0	0	0	0	0	0	0	0	0	0	0	0	2.57056
FHL3	Four and a half LIM domains protein 3	17.4794	355.329	268.977	271.684	290.997	337.27	145.641	269.579	271.054	153.524	140.278	214.873	322.741	195.626	295.207	219.905	208.895
FHOD1	FH1/FH2 domain-containing protein 1	173.87	79.0371	143.918	224.06	42.7847	75.9237	158.776	177.331	60.5559	150.514	201.646	96.3123	96.8176	135.247	76.5115	96.6573	82.4761
FILIP1	Filamin-A-interacting protein 1	30.5791	16.2716	34.7788	33.1333	19.4576	17.3491	34.7524	41.772	17.6139	44.3279	59.4552	38.742	21.5702	37.3102	14.984	69.9737	22.3681
FIP1L1	Pre-mRNA 3'-end-processing factor FIP1;Isoform of Q6UN15, Isoform 3 of Pre-mRNA 3'-end-processing factor FIP1;Isoform of Q6UN15, Isoform 5 of Pre-mRNA 3'-end-processing factor FIP1	3.27661	10.958	4.11353	4.11353	17.2103	12.0497	4.02703	4.57494	6.16817	11.7619	0	7.33469	10.1778	3.01667	7.16023	7.8151	6.87905
FIS1	Mitochondrial fission 1 protein	212.679	46.1882	94.3006	57.6055	33.7589	31.7159	50.3483	131.973	23.2678	142.291	62.0855	64.133	38.6861	107.505	37.96	56.2645	52.5083
FITM1	Fat storage-inducing transmembrane protein 1	77.326	32.4064	65.2702	82.597	18.2385	14.4304	81.2989	101.341	37.3728	51.2716	101.063	62.3852	36.3375	115.618	27.7669	64.794	61.6493
FITM2	Acyl-coenzyme A diphosphatase FITM2	24.2619	10.5762	25.4692	27.7054	13.0133	4.99778	17.0445	16.2213	4.00273	15.0826	22.3095	10.4781	11.475	17.9154	11.2209	69.6201	6.24494
FKBP15	FK506-binding protein 15	0	0	0	0	0	0	0	0	0	0	0	0	3.25353	0	0	0	0
FKBP2	Peptidyl-prolyl cis-trans isomerase FKBP2	0	0	0	0	5.62975	0	0	0	1.80367	0	0	0	3.77185	0	0	0	0
FKBP3	Peptidyl-prolyl cis-trans isomerase FKBP3	126.365	189.684	150.7	48.3241	123.478	131.183	76.6628	102.751	102.131	211.289	56.194	123.989	105.064	76.9887	162.827	224.458	200.23
FKBP4	Peptidyl-prolyl cis-trans isomerase FKBP4	0	0	0	0	5.82893	0	0	0	0	0	0	0	11.0727	0	5.17519	0	0
FKBP5	Peptidyl-prolyl cis-trans isomerase FKBP5	0	17.6983	23.1641	78.4809	118.029	283.973	129.326	0	119.634	0	0	0	27.1365	70.1499	0	8.46515	154.429
FKBP8	Peptidyl-prolyl cis-trans isomerase FKBP8	15.3506	0	5.59261	0	3.99382	12.4273	12.6324	7.83043	57.9637	5.77135	0	0	0	8.5512	11.4374	7.2416	7.32197
FKBP9	Peptidyl-prolyl cis-trans isomerase FKBP9	0	0	0	0	0	0	0	0	0	0	0	0	0	0	0	10.2267	0
FLG2	Filaggrin-2	0	0	0	0	0	1.09642	0	0	0	0	0	0	0	0	0	0	0
FLII	Isoform of Q13045, Isoform 2 of Protein flightless-1 homolog	62.7083	47.1119	68.2362	52.0432	27.8862	29.8935	42.1876	60.9377	21.0405	40.7828	45.1534	54.7497	10.7462	41.6512	25.7529	35.9281	48.2423
FLNA	Filamin-A;Isoform of P21333, Isoform 2 of Filamin-A	954.609	154.572	1067.61	2757.17	188.751	102.749	252.979	293.823	97.2201	260.902	352.444	193.59	132.481	273.292	196.529	289.291	359.856
FLNB	Filamin-B;Isoform of O75369, Isoform 2 of Filamin-B;Isoform of O75369, Isoform 8 of Filamin-B;Isoform of O75369, Isoform 9 of Filamin-B	130.595	19.1131	89.7459	166.788	9.62474	24.5741	79.2656	106.754	15.84	70.3683	194.935	42.4602	17.541	168.355	12.2187	23.1225	5.23514
FLNC	Filamin-C;Isoform of Q14315, Isoform 2 of Filamin-C	9047.43	1349.99	5546.44	6732.31	546.121	727.909	5908.6	6680.14	531.442	3660.81	9860.3	3628.96	753.45	5957	396.211	844.763	494.571
FLOT1	Flotillin-1	22.8678	12.4805	19.1124	34.9755	9.22973	7.98321	23.5985	26.4963	4.31376	17.1901	22.7662	15.055	8.21021	15.4322	5.28234	24.3352	13.1774
FLOT2	Flotillin-2	135.433	18.2025	49.9936	78.0305	17.0329	15.4517	64.9957	68.1845	15.9058	62.1408	81.1877	64.1478	26.2092	55.9922	10.564	20.4378	22.1324
FMC1	Protein FMC1 homolog	0	0	0	0	0	0	0	0	0	0	0	0	11.5227	0	0	0	0
FMNL3	Isoform of Q8IVF7, Isoform 2 of Formin-like protein 3	9.39995	2.82573	2.82573	2.82573	4.31409	5.00239	4.03631	4.86055	5.67226	13.1002	7.22254	6.01426	4.59996	14.1035	4.44045	8.18719	5.69283
FMOD	Fibromodulin	18.7424	13.9904	8.87799	21.7102	5.20701	4.81701	15.3845	19.4038	0	0	22.5004	12.3618	5.78435	15.4571	5.28356	12.9997	14.1817
FN1	Isoform of P02751, Isoform 1 of Fibronectin;Isoform of P02751, Isoform 14 of Fibronectin;Isoform of P02751, Isoform 3 of Fibronectin;Isoform of P02751, Isoform 8 of Fibronectin	595.697	10.2289	31.7186	52.2834	10.5387	28.0335	73.0777	124.447	12.1383	76.7851	157.54	187.233	21.5157	126.656	18.0105	47.428	23.1808
FN3K	Fructosamine-3-kinase	0	14.881	0	41.7988	12.2854	7.75671	34.4734	34.937	7.40212	22.4015	37.0587	18.7837	12.8574	15.9341	6.3027	22.6743	3.0035
FNBP1	Formin-binding protein 1;Isoform of Q96RU3, Isoform 3 of Formin-binding protein 1	0	5.02494	3.95562	0	2.21814	3.26496	0	0	0	0	0	0	3.25128	0	1.22582	0	5.82543
FNBP1L	Isoform of Q5T0N5, Isoform 2 of Formin-binding protein 1-like;Isoform of Q5T0N5, Isoform 5 of Formin-binding protein 1-like	0	50.5977	3.62422	50.5977	36.0072	41.436	2.85683	0	44.0004	44.7896	0	9.85784	21.343	75.7403	23.4978	76.0737	9.31812
FNTA	Protein farnesyltransferase/geranylgeranyltransferase type-1 subunit alpha	0	0	69.7934	0	0	15.5481	0	0	0	63.0343	0	51.5919	18.3086	0	7.80058	0	7.90366
FNTB	Protein farnesyltransferase subunit beta	0	5.18479	2.36927	5.18479	2.58576	0	0	0	0	0	0	0	1.3831	0	0	2.58068	0
FOCAD	Focadhesin	0	5.56584	5.5682	0	3.32881	3.59813	0	0	0	5.30002	0	3.39689	5.86077	9.48915	4.15745	4.25045	2.00737
FOXRED1	FAD-dependent oxidoreductase domain-containing protein 1;Isoform of Q96CU9, Isoform 3 of FAD-dependent oxidoreductase domain-containing protein 1	0	2.42511	0	0	0	0	0	0	0	0	0	0	0	0	1.31047	2.04897	1.58135
FREM2	FRAS1-related extracellular matrix protein 2	43.7447	0	9.13092	14.968	0	0	10.6239	14.0503	0	0	50.7096	3.95259	0	15.2661	0	0	0
FRG1	Protein FRG1	5.57347	7.96033	0	0	11.5157	13.3345	0	0	12.4783	18.953	0	11.3418	14.708	0	13.8556	14.4256	12.5409
FRMD3	FERM domain-containing protein 3;Isoform of A2A2Y4, Isoform 2 of FERM domain-containing protein 3	10.7208	0	0	9.22283	0	0	3.06962	0	0	0	8.53867	0	0	6.88695	0	0	0
FRYL	Protein furry homolog-like	0	0	0	0	0	0	0	0	0	0	0	0	0	0	0.0602874	0	0
FSCN1	Fascin	0	0	0	0	0	0	0	0	0	0	0	0	0	0	0	0	5.17164
FSD2	Fibronectin type III and SPRY domain-containing protein 2	126.802	70.6531	127.678	55.9067	21.9629	27.9755	45.9817	61.1203	13.9494	30.9726	51.5692	62.3709	10.8631	38.2672	28.4136	20.9959	74.7357
FTH1	Ferritin heavy chain	0	18.558	0	0	8.51312	13.5512	0	0	0	0	11.2173	0	13.9077	12.9846	0	27.4875	10.7258
FTL	Ferritin light chain	0	0	0	0	0	0	0	0	0	0	40.2708	0	0	0	0	0	0
FTO	Alpha-ketoglutarate-dependent dioxygenase FTO	0	19.8761	57.6122	0	31.102	33.8826	47.9164	61.8851	38.7575	84.6988	0	66.3715	8.61102	92.0719	28.7162	59.0113	61.3519
FTSJ3	pre-rRNA 2'-O-ribose RNA methyltransferase FTSJ3	0	0	0	0	0	0	0	0	0	0	0	0	0	0	0	0.893994	0
FUBP1	Far upstream element-binding protein 1	0	0	3.03539	0	4.14848	2.85218	0	0	0	8.60552	0	0	2.99471	0	0	5.69161	3.92761
FUNDC1	FUN14 domain-containing protein 1	24.1671	8.46898	19.2626	27.5654	5.26852	6.31797	14.1933	36.9646	7.03001	53.2939	23.8336	16.1503	39.5963	39.951	0	13.9487	0
FUNDC2	FUN14 domain-containing protein 2	86.7012	100.515	67.6573	201.588	79.3394	65.1744	41.9358	71.711	29.8302	61.5003	41.7052	41.0565	61.6388	47.5256	58.08	83.1256	77.4691
FUS	RNA-binding protein FUS;Isoform of P35637, Isoform Short of RNA-binding protein FUS	20.7503	36.7816	17.1086	18.8653	11.476	17.3331	18.8966	19.1331	11.5546	21.5416	14.672	17.6718	12.9884	31.7634	10.7208	97.5292	18.9596
FXR1	RNA-binding protein FXR1	161.967	110.721	187.895	125.448	132.309	237.18	200.486	269.331	139.88	278.983	159.548	241.981	100.197	264.989	168.239	203.814	106.225
FXR2	RNA-binding protein FXR2	11.4426	5.67193	13.9545	9.99457	2.91668	16.6218	14.2654	22.5365	9.15495	20.9448	16.1024	18.146	3.52902	21.8538	10.7777	19.2546	6.98599
FXYD1	Phospholemman	136.372	16.9993	41.0596	117.399	9.81949	16.6026	58.5308	111.042	15.1341	59.8518	117.406	30.7314	17.4685	113.717	20.1107	22.1991	23.6444
FYCO1	FYVE and coiled-coil domain-containing protein 1;Isoform of Q9BQS8, Isoform 4 of FYVE and coiled-coil domain-containing protein 1	42.887	15.8866	46.9477	67.7742	16.9859	17.2853	55.7551	114.363	14.9608	37.1516	131.519	12.9623	17.6707	84.9038	16.279	24.0234	13.373
FYTTD1	UAP56-interacting factor	17.4834	10.8126	16.6117	0	9.01133	13.1213	0	23.0031	0	31.0511	0	20.9644	10.463	29.203	0	19.9267	11.7443
FZD4	Frizzled-4	0	0	0	0	2.45521	1.37936	0	0	0	13.1728	15.4807	3.92809	0	18.0313	0	0	0
G3BP1	Ras GTPase-activating protein-binding protein 1	14.2045	7.5619	7.71285	14.2254	6.41932	7.61338	9.14081	9.70031	6.1767	6.27303	9.60926	6.9228	3.75193	12.2808	2.90153	4.84323	7.833
G3BP2	Ras GTPase-activating protein-binding protein 2	9.75496	7.56016	11.8964	4.7848	8.23169	10.4226	10.2302	13.0763	7.23196	15.4197	10.7545	10.2703	5.22943	10.9151	6.04821	7.24661	5.63026
G6PC3	Glucose-6-phosphatase 3	0	0	0	0	0	0	0	0	0	12.413	0	0	0	0	0	0	0
G6PD	Glucose-6-phosphate 1-dehydrogenase;Isoform of P11413, Isoform Long of Glucose-6-phosphate 1-dehydrogenase;Isoform of P11413, Isoform 3 of Glucose-6-phosphate 1-dehydrogenase	0	0	0	0	0	0	0	0	0	0	0	0	0	0	0	16.7276	0
GAA	Lysosomal alpha-glucosidase	0	14.9187	14.9187	14.9187	5.51936	0	0	0	0	0	0	0	0	8.04317	0	10.3618	10.5397
GAB1	GRB2-associated-binding protein 1;Isoform of Q13480, Isoform 2 of GRB2-associated-binding protein 1	0	0	0	0	0	0	0	0	0	0	0	0	0	4.26508	0	0	0
GABARAPL2	Gamma-aminobutyric acid receptor-associated protein-like 2	0	0	0	0	0	0	0	0	2.21389	2.40368	0	0	0	0	2.19597	12.2895	0
GABPA	GA-binding protein alpha chain	0	1.41785	1.41785	1.41785	0	0	0	0	0	0	0	0	0	0	0	0	0
GADD45GIP1	Growth arrest and DNA damage-inducible proteins-interacting protein 1	0	22.6585	15.908	0	28.2481	17.0482	0	5.68572	25.9272	20.1919	0	10.1808	32.8666	24.2844	13.9421	47.069	18.5707
GALC	Isoform of P54803, Isoform 4 of Galactocerebrosidase	0	1.52908	0	0	0	0	0	0	0	0	0	0	0	0	0	0	0
GALK1	Galactokinase	0	5.87937	0	0	0	9.15118	0	0	0	0	0	0	2.35914	0	0	100.539	0
GALNT2	Polypeptide N-acetylgalactosaminyltransferase 2	10.2029	6.41108	5.86158	17.6752	2.33878	0	7.00623	11.4627	3.65305	5.33921	26.983	26.6552	3.01964	12.9607	2.05744	3.28878	3.01945
GAMT	Guanidinoacetate N-methyltransferase	12.1654	16.1002	22.096	39.7342	12.8792	12.9472	8.92451	19.0803	7.00578	18.6113	0	0	13.7011	16.309	9.91578	13.2292	6.40661
GANAB	Neutral alpha-glucosidase AB	1644.09	130.296	44.8244	25.4369	42.1686	31.5048	3.91999	19.2702	10.3958	10.9895	0	15.8483	40.9878	7.50287	21.0149	36.8498	41.184
GANC	Neutral alpha-glucosidase C	0	0.478444	0.478444	0.478444	0	0	0	0	0	0	0	0	0	0	0	0	0
GAPDH	Glyceraldehyde-3-phosphate dehydrogenase	1456.21	1741.53	1736.66	3968.84	1484.53	1428.16	2212.51	2329.09	775.097	2115.33	3549.69	1636.75	2405.77	2667.64	917.332	958.815	1392.93
GAPDH	Isoform of P04406, Isoform 2 of Glyceraldehyde-3-phosphate dehydrogenase	0	1.87082	0	0	2.15421	0	0	0	0	4.62676	0	0	6.14688	0	0	6.72876	0
GAPDHS	Glyceraldehyde-3-phosphate dehydrogenase, testis-specific	136.121	70.8159	58.4541	143.537	43.7813	19.0843	159.032	236.421	94.3314	72.2565	965.584	102.939	30.6588	395.482	5.23994	0	34.9726
GAPVD1	Isoform of Q14C86, Isoform 2 of GTPase-activating protein and VPS9 domain-containing protein 1;Isoform of Q14C86, Isoform 6 of GTPase-activating protein and VPS9 domain-containing protein 1	0	0	30.2423	60.7385	68.7051	0	21.6314	0	33.7409	0	61.0085	22.0639	66.7351	0	33.7852	0	0
GAR1	H/ACA ribonucleoprotein complex subunit 1;Isoform of Q9NY12, Isoform 2 of H/ACA ribonucleoprotein complex subunit 1	0	18.3498	9.70766	0	4.19458	13.43	13.8384	0	8.56754	0	0	19.4036	2.83175	0	20.6218	10.773	32.0058
GARS1	Glycine--tRNA ligase	10.5154	7.99891	6.5647	13.4575	3.9929	5.67254	0	14.0892	0	8.91615	0	8.31538	5.54568	0	0	5.32028	5.47556
GART	Trifunctional purine biosynthetic protein adenosine-3	193.297	3.9168	0	0	2.10615	0	0	0	0	0	0	0	1.7209	0	1.59121	0.732715	1.26104
GATAD2B	Transcriptional repressor p66-beta	2.45259	4.52409	2.42781	1.53026	8.43896	8.11853	0	0	5.88242	5.68692	0	2.28182	9.07516	0	3.82144	18.5155	7.00371
GATB	Glutamyl-tRNA(Gln) amidotransferase subunit B, mitochondrial	0	0	0	0	0	0	0	0	0	0	0	0	0	0	0	2.27371	0
GATD1	Glutamine amidotransferase-like class 1 domain-containing protein 1	0	1.085	0	0	0	0	0	0	0	0	0	0	2.23437	0	0	0.589569	0.967672
GATD3B;GATD3	Putative glutamine amidotransferase-like class 1 domain-containing protein 3B, mitochondrial;Glutamine amidotransferase-like class 1 domain-containing protein 3, mitochondrial	38.4614	55.6456	36.8226	75.6596	20.8012	32.002	27.9244	50.0133	28.1032	49.8514	54.9528	49.6572	41.2149	59.8311	29.835	21.0008	47.4382
GBE1	1,4-alpha-glucan-branching enzyme	20.9279	60.9159	28.7882	30.4905	22.1865	16.1279	0	22.7555	17.2964	18.7965	0	19.6328	28.4875	27.1411	12.2638	33.5224	41.8243
GBF1	Golgi-specific brefeldin A-resistance guanine nucleotide exchange factor 1;Isoform of Q92538, Isoform 2 of Golgi-specific brefeldin A-resistance guanine nucleotide exchange factor 1;Isofo	0	0	0	0	0	14.8517	0	0	0	0	0	0	0	0	0	0	0
GBP2	Guanylate-binding protein 2	0	0	0	0	0	0	0	0	0	0	0	0	0	0	5.55682	10.9379	0
GC	Vitamin D-binding protein;Isoform of P02774, Isoform 3 of Vitamin D-binding protein	0	0	0	0	8.64746	19.1019	0	0	20.2841	0	8.79003	0	48.1897	0	17.3431	8.471	13.6971
GCAT	2-amino-3-ketobutyrate coenzyme A ligase, mitochondrial;Isoform of O75600, Isoform 2 of 2-amino-3-ketobutyrate coenzyme A ligase, mitochondrial	0	9.40223	0	0	0	0	0	0	0	0	0	0	0	0	0	0	0
GCC2	GRIP and coiled-coil domain-containing protein 2	0	0	0	0	0	0	0	141.412	0	0	0	0	0	0	0	0	0
GCDH	Glutaryl-CoA dehydrogenase, mitochondrial	0	6.83016	0	137.773	2.10179	22.7288	0	0	0	4.64919	63.1234	0	0	0	0	2.90426	0
GCFC2	Intron Large complex component GCFC2	0	6.05942	6.05942	6.05942	0	0	0	0	0	0	0	0	0	0	0	0	0
GCLM	Glutamate--cysteine ligase regulatory subunit	0	0	0	49.4156	0	3.1324	0	0	0	0	0	0	0	0	0	0	0
GCN1	eIF-2-alpha kinase activator GCN1	42.8574	21.0878	19.4408	16.8564	10.228	13.3837	13.3071	18.7839	5.01021	10.6042	12.1532	13.252	11.9993	14.8569	6.45099	18.6224	7.83481
GCSH	Glycine cleavage system H protein, mitochondrial	0	12.8272	12.8272	12.8272	0	0	0	0	0	0	0	0	4.26731	0	0.753402	2.75826	0
GDA	Guanine deaminase	0	0	0	0	0	0	0	0	0	0	0	0	1.40882	0	0	0	0
GDE1	Glycerophosphodiester phosphodiesterase 1	2.84005	6.15079	11.1845	14.069	0	0	0	11.0531	0	11.4651	0	0	0	12.4488	0	0	0
GDI1	Rab GDP dissociation inhibitor alpha	8.69411	16.1485	11.2206	20.1263	3.8609	2.84956	0	8.28869	1.62389	6.22841	0	5.19376	5.4432	3.80388	3.80826	7.9549	6.92673
GDI2	Rab GDP dissociation inhibitor beta	115.911	203.672	111.203	84.8329	103.965	98.964	47.8613	94.7296	89.5481	50.0008	41.114	68.5617	108.431	51.6687	107.307	160.966	127.623
GDPD1	Lysophospholipase D GDPD1	20.7026	0	0	0	0	0	0	0	0	11.1938	0	0	0	0	0	0	0
GEMIN5	Gem-associated protein 5	0	0	34.2149	0	4.62795	0	0	0	0	0	0	13.2429	2.55185	0	2.31167	0	3.76035
GET1	Guided entry of tail-anchored proteins factor 1	9.43899	7.85834	7.85834	10.9437	0	2.12656	0	8.85087	6.99771	4.75967	0	3.64403	3.39199	5.37065	0	0	0
GET3	ATPase GET3	21.4598	19.4953	18.089	18.7527	8.66341	7.08888	14.6617	22.2068	6.56835	15.5983	29.4571	13.458	11.3124	13.773	5.14667	13.7225	9.84075
GET4	Golgi to ER traffic protein 4 homolog	0	0	0	0	1.31944	0	0	0	0	0	0	18.1043	0	0	1.31409	4.60718	0
GFM1	Elongation factor G, mitochondrial	7.89451	10.472	5.16077	6.34109	3.30361	2.82538	0	5.78077	2.10502	10.0179	0	3.71776	4.35868	6.45397	3.3723	7.88197	5.66276
GFM2	Ribosome-releasing factor 2, mitochondrial;Isoform of Q969S9, Isoform 3 of Ribosome-releasing factor 2, mitochondrial	0	0	0	0	0	0	0	0	0	0	0	27.9178	0	0	0	0	0
GFOD1	Glucose-fructose oxidoreductase domain-containing protein 1	39.9692	5.72046	9.66751	54.7601	2.1076	1.42324	15.4307	38.0966	3.84199	12.7285	42.2173	9.83064	2.14069	26.8242	1.34161	3.03134	4.25724
GFPT1	Glutamine--fructose-6-phosphate aminotransferase [isomerizing] 1;Isoform of Q06210, Isoform 2 of Glutamine--fructose-6-phosphate aminotransferase [isomerizing] 1	0	0	28.4915	122.677	0	0	0	0	0	0	25.7508	0	20.9245	35.4917	11.4374	0	4.60711
GFUS	GDP-L-fucose synthase	0	0	0	0	0	7.10522	0	0	0	0	0	0	0	0	0	0	0
GGA1	ADP-ribosylation factor-binding protein GGA1;Isoform of Q9UJY5, Isoform 4 of ADP-ribosylation factor-binding protein GGA1	0	0	0	0	0	0	0	0	0	0	14.6181	0	0	0	0	0	0
GGCX	Vitamin K-dependent gamma-carboxylase	0	0	0	0	0	0	0	0	0	8.94699	0	0	0	0	0	0	0
GGH	Gamma-glutamyl hydrolase	0	0	0	0	0	0	0	0	0	0	0	3.54962	0	0	0	0	3.16613
GGPS1	Geranylgeranyl pyrophosphate synthase	28.1401	22.7421	22.7421	22.7421	14.1511	3.13384	0	0	0	0	0	0	18.8389	0	0	0	0
GHITM	Growth hormone-inducible transmembrane protein	225.645	29.1898	117.548	125.622	36.1234	25.4084	81.7494	147.532	21.7599	148.039	197.51	84.466	16.5445	167.466	21.8588	38.5776	20.5792
GID8	Glucose-induced degradation protein 8 homolog	0	5.07377	4.27676	0	2.69209	3.00177	0	7.86839	2.87578	2.57263	0	3.70324	2.87643	4.62197	3.5037	6.68705	4.51158
GIGYF2	GRB10-interacting GYF protein 2;Isoform of Q6Y7W6, Isoform 3 of GRB10-interacting GYF protein 2;Isoform of Q6Y7W6, Isoform 4 of GRB10-interacting GYF protein 2	49.5707	2.14206	2.14206	2.14206	1.87451	0	0	0	0	0	0	0	1.68949	0	0	2.01203	0
GIMAP1	GTPase IMAP family member 1	0	0	0	0	0	0	0	0.693243	0	3.88488	0	0	0.708687	5.24599	2.67132	0	3.45405
GIPC1	PDZ domain-containing protein GIPC1	0	0	0	0	0	0	0	0	2.07805	0	0	1.97279	0	12.7828	0	0	1.95627
GIT1	ARF GTPase-activating protein GIT1;Isoform of Q9Y2X7, Isoform 3 of ARF GTPase-activating protein GIT1	0	0	0	0	0	0	0	0	0	0	0	0	13.16	0	0	0	0
GIT2	ARF GTPase-activating protein GIT2	4.16031	7.96399	15.1326	10.6553	7.40097	5.08718	0	0	0	0	0	0	0	0	2.89685	0	0
GK	Glycerol kinase;Isoform of P32189, Isoform 1 of Glycerol kinase;Isoform of P32189, Isoform 2 of Glycerol kinase;Isoform of P32189, Isoform 4 of Glycerol kinase	0	1.25323	0	0	0	0	0	0	0	0	0	0	0	0	0	0	0
GKAP1	Isoform of Q5VSY0, Isoform 2 of G kinase-anchoring protein 1	4.50013	8.7868	10.39	1.96908	16.7451	17.3891	3.44655	2.23762	11.9249	11.0326	0	7.79798	12.2986	5.59535	13.7065	78.4937	8.40675
GLG1	Golgi apparatus protein 1;Isoform of Q92896, Isoform 2 of Golgi apparatus protein 1;Isoform of Q92896, Isoform 3 of Golgi apparatus protein 1	0	0	0	0	0	0	16.668	0	0	0	0	0	8.38986	0	0	0	0
GLIPR2	Golgi-associated plant pathogenesis-related protein 1	0	1.67815	0	0	2.03418	2.09835	0	0	1.9101	0	0	1.41737	3.97424	4.11176	1.81939	6.39786	6.3508
GLOD4	Glyoxalase domain-containing protein 4;Isoform of Q9HC38, Isoform 2 of Glyoxalase domain-containing protein 4	0	0	0	0	1.42524	0.89182	0	0	0	0	0	0	2.12009	0	0	2.49078	0
GLRX3	Glutaredoxin-3	78.2754	0	0	175.454	0	69.6751	0	0	0	0	0	0	0	0	28.5185	0	0
GLS	Isoform of O94925, Isoform 3 of Glutaminase kidney isoform, mitochondrial	0	2.71976	0	0	0	4.02603	0	0	0	0	0	0	0	0	0	0	0
GLUD1	Glutamate dehydrogenase 1, mitochondrial	80.2279	35.443	18.2985	17.7078	22.0033	15.8335	18.1838	12.9863	11.892	13.7049	14.0537	13.35	24.2468	11.7931	22.0712	36.2439	24.9706
GLYR1	Cytokine-like nuclear factor N-PAC	53.398	10.2999	12.048	56.8544	22.7504	12.7902	33.2954	36.2732	20.5568	15.3985	71.7117	9.28286	18.5035	22.674	16.0408	38.3296	14.1686
GMPPA	Mannose-1-phosphate guanyltransferase alpha	0	6.01355	1.89502	0	1.32858	0	0	0	0	0	0	0	2.22359	0	1.06789	1.53333	2.77159
GMPPB	Isoform of Q9Y5P6, Isoform 2 of Mannose-1-phosphate guanyltransferase beta	0	1.47649	0	0	0	68.9886	0	0	0	0	0	0	0	0	50.8893	0	0
GMPR	GMP reductase 1	9.8045	13.7287	19.0421	117.778	6.16011	0	29.0325	16.9897	1.69183	6.75892	5.41739	8.22019	8.94447	4.30256	6.62715	5.32887	5.99692
GMPR2	GMP reductase 2;Isoform of Q9P2T1, Isoform 2 of GMP reductase 2;Isoform of Q9P2T1, Isoform 3 of GMP reductase 2	0	3.07986	3.07986	3.07986	0	0	0	0	0	0	0	0	5.14227	0	0	0	0
GNA11	Guanine nucleotide-binding protein subunit alpha-11	54.5538	13.0236	29.2425	11.2529	0	7.85375	44.8213	89.6573	0	26.2106	0	12.0332	9.30153	33.1533	7.69709	8.83354	12.4316
GNA13	Guanine nucleotide-binding protein subunit alpha-13	0	24.2567	27.3158	0	9.77212	0	15.335	0	0	16.3522	0	0	14.5732	0	0	0	21.1363
GNAI1	Isoform of P63096, Isoform 2 of Guanine nucleotide-binding protein G(i) subunit alpha-1	0	2.72164	1.69361	0	0	0	0	0	0	0	0	0	1.15573	0	0	0	0
GNAI2	Guanine nucleotide-binding protein G(i) subunit alpha-2	22.7628	17.532	6.3711	103.458	0	46.2676	0	0	0	0	0	7.901	13.7074	0	42.1722	11.6825	22.7001
GNAI3	Guanine nucleotide-binding protein G(i) subunit alpha-3	0	0	0	0	0	0	0	0	0	0	0	0	0	0	0	9.95714	16.8395
GNAO1	Guanine nucleotide-binding protein G(o) subunit alpha	0	0	0	0	0	0	29.8803	0	0	0	0	0	10.317	0	0	0	0
GNAS	Guanine nucleotide-binding protein G(s) subunit alpha isoforms XLas	21.263	10.835	9.03472	16.6021	4.01318	1.84152	4.07929	6.33703	0	3.30809	0	4.8093	3.60707	8.43388	2.2889	4.45487	3.75775
GNB1	Isoform of P62873, Isoform 2 of Guanine nucleotide-binding protein G(I)/G(S)/G(T) subunit beta-1	14.4752	8.57099	11.0234	9.96011	5.3026	4.7117	0	7.73367	2.78263	7.89727	25.5323	13.1124	7.67104	10.9756	4.02278	7.97324	8.22485
GNB2	Guanine nucleotide-binding protein G(I)/G(S)/G(T) subunit beta-2	114.558	30.8909	24.8093	37.9983	11.7487	13.1062	8.45444	22.9132	6.92718	8.00345	14.6214	13.304	19.5144	10.1351	10.7381	15.4218	28.6041
GNG12	Guanine nucleotide-binding protein G(I)/G(S)/G(O) subunit gamma-12	14.029	9.19668	6.9665	16.2504	1.49965	2.91459	4.02425	11.8382	1.37517	3.40704	3.6829	4.39321	4.38485	6.17202	2.14302	4.64874	7.11424
GNG2	Guanine nucleotide-binding protein G(I)/G(S)/G(O) subunit gamma-2	3.44846	0	0	0	0	0	0	0	0	0	0	0	4.01194	0	0	3.86309	0.891925
GNG5	Guanine nucleotide-binding protein G(I)/G(S)/G(O) subunit gamma-5	0	46.0501	0	0	0	0	0	0	0	0	0	0	0	0	0	0	0
GNG7	Guanine nucleotide-binding protein G(I)/G(S)/G(O) subunit gamma-7	26.0271	2.50225	0	0	0	0	0	0	0	0	0	0	0	0	0	0.632608	0
GNL1	Guanine nucleotide-binding protein-like 1	6.98112	5.90923	7.7164	4.35275	6.47871	4.23426	2.51353	0	0	0	0	7.24573	3.96876	0	3.39021	9.35265	4.75257
GNL2	Nucleolar GTP-binding protein 2	0	5.0843	5.0843	5.0843	3.59409	1.96371	0	0	2.80838	0	0	3.54227	4.25652	0	2.04139	25.4352	0
GNL3	Guanine nucleotide-binding protein-like 3;Isoform of Q9BVP2, Isoform 2 of Guanine nucleotide-binding protein-like 3	10.2973	8.70625	8.70625	8.70625	9.0989	5.42722	4.86726	4.35097	7.46202	8.58573	0	6.94036	10.1895	6.48974	8.09146	22.6535	8.0173
GNL3L	Guanine nucleotide-binding protein-like 3-like protein	7.55658	0	3.58273	8.33229	0	0	0	6.18138	0	0	12.6471	0	0	8.79685	0	0	0
GNPAT	Dihydroxyacetone phosphate acyltransferase	8.29326	2.84401	7.0051	3.09075	2.77836	2.99004	6.06435	5.6596	1.35849	4.86158	0	3.88581	2.10017	4.83646	2.19901	3.2684	2.49131
GOLGA1	Golgin subfamily A member 1	0	0.386483	0.386483	0.386483	0	0	0	0	0	0	0	0	0	0	0	0	0
GOLGA2	Golgin subfamily A member 2	0	1.31987	17.4628	1.31987	0	0	0	0	0	0	0	0	0	0	2.60932	0	4.68628
GOLGA3	Golgin subfamily A member 3	0	0	0	0	0	1.23531	0	0	3.38966	0	62.3146	0	0	0	0	9.18406	0
GOLGB1	Golgin subfamily B member 1;Isoform of Q14789, Isoform 3 of Golgin subfamily B member 1;Isoform of Q14789, Isoform 4 of Golgin subfamily B member 1	3.84791	1.90165	0	3.22823	1.33379	0	0	0	0	4.28427	0	0	1.51515	3.52718	1.72555	4.86446	0
GOLPH3	Golgi phosphoprotein 3	0	0	0	0	0	0	6.02677	0	0	0	0	0	0	0	0	0	0
GOLPH3L	Golgi phosphoprotein 3-like	0	0	0	0	0	0	0	0	0	0	0	0	1.20463	0	0	0	0
GOLT1B	Vesicle transport protein GOT1B	0	0	0	0	0	0	0	0	0	1.62247	0	0	0	0	0	0	0
GOPC	Golgi-associated PDZ and coiled-coil motif-containing protein	0	1.4068	0	0	0	0	10.6044	0	0	0	0	8.11861	0	0	0	0	0
GOSR2	Golgi SNAP receptor complex member 2;Isoform of O14653, Isoform B of Golgi SNAP receptor complex member 2	0	0	9.21541	0	0	0	0	0	0	6.52345	0	0	0	0	0	0	0
GOT1	Aspartate aminotransferase, cytoplasmic	75.7749	187.815	125.52	100.615	43.3101	34.3303	20.4637	76.8397	16.005	178.845	75.7339	55.8833	95.9521	71.7013	24.3347	95.7932	79.6945
GOT2	Aspartate aminotransferase, mitochondrial	55.6449	0	3.27201	13.2851	3.81759	5.73822	4.1019	9.78106	2.59691	17.996	33.759	11.9917	6.44547	15.532	5.4141	14.2015	10.1234
GPAA1	Glycosylphosphatidylinositol anchor attachment 1 protein	31.9908	0	20.8456	33.5015	0	0	35.2846	46.5249	0	28.0012	59.3048	21.0079	11.4197	49.1052	10.5664	18.3499	14.3724
GPAM	Glycerol-3-phosphate acyltransferase 1, mitochondrial	0	20.1294	0	0	15.696	0	0	0	0	0	0	0	0	0	25.7945	0	0
GPAT3	Glycerol-3-phosphate acyltransferase 3	105.275	2.90958	19.064	16.0274	2.99909	12.4302	14.2917	11.6597	1.62015	11.6059	6.68329	12.676	2.01351	5.57991	4.35438	3.25488	1.7121
GPAT4	Glycerol-3-phosphate acyltransferase 4	0	0	0	0	1.14998	0	0	0	0	0	0	0	0	0	0	0	0.74478
GPATCH4	G patch domain-containing protein 4;Isoform of Q5T3I0, Isoform 3 of G patch domain-containing protein 4	0	0	0	0	0	0	0	0	0	0	0	0	0	0	0	7.63545	0
GPATCH8	G patch domain-containing protein 8	4.96278	3.065	6.44043	6.44043	4.76528	5.51794	0	0	2.75332	3.82452	0	2.77129	6.25251	0	2.94325	42.0179	3.75689
GPC1	Glypican-1	45.3968	3.54512	11.6927	10.7935	5.79547	3.44411	7.26917	17.5706	15.5473	0	0	4.46871	3.88288	8.48257	2.56819	0	4.96968
GPD1	Isoform of P21695, Isoform 2 of Glycerol-3-phosphate dehydrogenase [NAD(+)], cytoplasmic	210.439	194.102	87.0191	159.171	53.2707	33.6107	49.2816	69.0058	22.6911	27.2632	84.2151	27.2635	80.6965	37.6294	38.5946	27.8955	76.3006
GPD1L	Glycerol-3-phosphate dehydrogenase 1-like protein	66.3323	133.147	72.613	82.0284	53.2707	40.6235	42.2654	56.1288	33.0564	131.243	111.735	55.5881	55.0877	23.7699	45.6485	66.2727	69.507
GPD2	Glycerol-3-phosphate dehydrogenase, mitochondrial	36.6459	38.1005	30.4519	53.5999	26.3626	8.05707	12.6295	31.4547	3.81378	11.6433	12.089	12.6061	23.8097	21.5292	6.86478	31.3715	17.2436
GPHN	Gephyrin;Isoform of Q9NQX3, Isoform 2 of Gephyrin	22.947	6.80661	4.7121	6.00709	4.55815	2.81564	3.69645	3.7298	1.82623	8.808	23.7241	1.94887	5.43569	0	6.40216	6.11132	0
GPI	Glucose-6-phosphate isomerase	0	13.132	14.415	25.0014	34.601	8.29234	0	371.096	11.7262	18.1835	12.0334	15.4947	32.4904	29.7254	3.85502	34.949	8.24761
GPKOW	G-patch domain and KOW motifs-containing protein	0	0	2.99926	0	0	0	0	0	0	0	0	0	0	0	0	0	0
GPLD1	Phosphatidylinositol-glycan-specific phospholipase D	43.2738	0	0	7.91706	0	0	0	0	0	0	0	0	0	0	0	0	0
GPN1	GPN-loop GTPase 1;Isoform of Q9HCN4, Isoform 2 of GPN-loop GTPase 1;Isoform of Q9HCN4, Isoform 4 of GPN-loop GTPase 1;Isoform of Q9HCN4, Isoform 5 of GPN-loop GTPase 1	0	1.98761	4.8497	0	0	0	0	0	0	0	0	0	0	0	0	0	1.16877
GPNMB	Transmembrane glycoprotein NMB;Isoform of Q14956, Isoform 2 of Transmembrane glycoprotein NMB	0	32.8951	0	0	38.0881	14.7257	0	40.0761	30.7013	80.7007	0	0	34.5983	0	43.7247	66.0746	80.1177
GPR89B	Isoform of B7ZAQ6, Isoform 2 of Golgi pH regulator A;Isoform of B7ZAQ6, Isoform 3 of Golgi pH regulator A;Golgi pH regulator B	28.4397	0	8.36016	0	2.45578	0	0	20.8682	2.55656	9.965	0	0	0	18.4811	0	3.79782	0
GPRC5B	G-protein coupled receptor family C group 5 member B	0	0	0	0	0	0	0	0	0	3.6056	0	0	0	0	0	0	0
GPRC5C	G-protein coupled receptor family C group 5 member C;Isoform of Q9NQ84, Isoform 2 of G-protein coupled receptor family C group 5 member C	0	0	0	49.0867	0	0	53.4422	0	0	0	0	0	0	0	0	0	0
GPRIN1	G protein-regulated inducer of neurite outgrowth 1	0	0	0	0	0	0	0	0	0.633222	0	0	0	0	0	0	0	0
GPS1	COP9 signalosome complex subunit 1;Isoform of Q13098, Isoform 4 of COP9 signalosome complex subunit 1;Isoform of Q13098, Isoform 2 of COP9 signalosome complex subunit 1	26.4439	21.4008	25.0389	42.3121	17.5303	15.6559	8.3943	16.3187	7.67284	16.9737	9.15778	13.458	20.3214	12.777	8.36232	15.4182	10.825
GPS1;GPS1;GPS1	Isoform of Q13098, COP9 signalosome complex subunit 1;Isoform of Q13098, COP9 signalosome complex subunit 1;Isoform of Q13098, COP9 signalosome complex subunit 1	0	0	0	0	0	0	0	0	0	0	0	0	0	0	2.10197	0	0
GPT	Alanine aminotransferase 1	13.2961	33.3066	14.4982	26.8265	8.855	2.69822	3.19216	6.9149	4.81456	15.3277	13.3965	7.62749	15.7273	4.72636	3.6285	67.5826	8.77866
GPT2	Alanine aminotransferase 2	0	0	0	0	1.10813	17.9092	0	0	0.67446	6.82303	0	0	0	0	0	0	1.82066
GPX1	Glutathione peroxidase 1	24.195	27.0353	13.1618	29.872	7.23417	11.9916	15.6706	19.7327	4.92897	11.0708	30.9521	11.2949	11.6347	21.2631	4.94797	0	13.7192
GPX3	Glutathione peroxidase 3	0	4.46613	4.95581	5.72749	4.51636	0	4.85048	6.57333	4.14912	6.36615	6.54471	3.5619	7.65516	0	3.47397	11.9794	4.03393
GPX4	Phospholipid hydroperoxide glutathione peroxidase;Isoform of P36969, Isoform Cytoplasmic of Phospholipid hydroperoxide glutathione peroxidase	47.1547	38.0917	34.2227	36.2296	16.7105	24.9045	37.9127	63.9272	11.8647	44.0126	37.7042	30.0249	29.8026	45.9862	17.6859	91.0196	27.5251
GPX7	Glutathione peroxidase 7	0	10.2337	39.9774	0	0	9.91008	0	0	0	0	0	0	0	0	0	0	0
GRHPR	Glyoxylate reductase/hydroxypyruvate reductase	56.5621	33.5994	12.3371	14.913	10.9166	6.41471	0	14.9171	5.06123	6.68771	5.91412	6.50552	15.2881	6.22339	6.37568	12.8776	9.93638
GRK2	Beta-adrenergic receptor kinase 1	0	0	26.8235	0	10.459	0	0	0	5.2742	41.0561	0	27.251	7.6905	32.7663	7.86551	29.3924	14.2537
GRN	Progranulin;Isoform of P28799, Isoform 2 of Progranulin	0	0	0	0	0	0	0	0	0	0	0	2.36964	0	0	0	1.69721	0
GRPEL1	GrpE protein homolog 1, mitochondrial	0	13.7541	0	0	0	79.9424	0	0	129.466	213.539	0	0	0	0	0	0	0
GRSF1	G-rich sequence factor 1	0	6.93475	6.09277	3.31867	4.12657	4.73563	0	0	0	0	0	0	5.76573	20.6932	0	4.67127	2.75631
GRWD1	Glutamate-rich WD repeat-containing protein 1	4.00982	3.511	4.03845	0	0	0	0	0	0	0	0	1.6538	0	0	3.33908	60.9305	3.74566
GSK3A	Glycogen synthase kinase-3 alpha	6.64546	9.34396	0	0	0	8.9367	0	0	2.79419	7.64147	0	0	4.66074	2.05697	5.59534	4.95262	5.97074
GSK3B	Glycogen synthase kinase-3 beta;Isoform of P49841, Isoform 2 of Glycogen synthase kinase-3 beta	14.2045	12.7829	9.94294	13.7266	8.47011	7.5193	8.30395	19.2613	5.83789	9.13224	33.0819	9.14286	7.10975	11.8475	9.76847	9.67687	10.2289
GSN	Gelsolin	426.114	75.5842	80.9123	69.6569	55.6274	50.2548	86.5934	111.528	44.1323	43.1496	66.4493	77.55	62.4388	47.1115	47.9873	219.349	95.4175
GSPT1	Isoform of P15170, Isoform 2 of Eukaryotic peptide chain release factor GTP-binding subunit ERF3A;Isoform of P15170, Isoform 3 of Eukaryotic peptide chain release factor GTP-binding subunit ER	0	0	0	0	0	13.5793	0	0	0	0	0	0	0	0	0	0	0
GSR	Glutathione reductase, mitochondrial;Isoform of P00390, Isoform Cytoplasmic of Glutathione reductase, mitochondrial;Isoform of P00390, Isoform 3 of Glutathione reductase, mitochondrial	0	0	0	0	0	0	0	0	0	0	0	0	2.50412	0	0	0	0
GSTCD	Glutathione S-transferase C-terminal domain-containing protein	0	0	0	0	0	2.99004	0	0	0	0	0	0	0	0	0	0	0
GSTK1	Glutathione S-transferase kappa 1	7.04085	9.35472	6.93769	5.58296	3.80267	5.42597	3.85376	8.34038	7.27706	20.5768	19.3103	9.35151	11.8483	18.8637	6.88061	54.8573	13.1138
GSTM1	Glutathione S-transferase Mu 1	0	15.2803	0	0	38.0881	0	0	35.3009	0	5.62441	0	0	10.8082	28.1337	0	16.54	13.9357
GSTM2	Glutathione S-transferase Mu 2	49.5479	28.0693	39.6383	65.2325	15.5449	9.18919	43.4995	38.0177	11.9277	52.1287	83.3854	23.1037	26.0468	30.9049	10.8075	26.2322	23.9182
GSTM3	Glutathione S-transferase Mu 3	0	18.2403	7.54596	23.6845	9.63139	0	0	0	4.15199	0	11.9892	0	7.85153	0	3.91045	8.59874	9.77526
GSTM4	Glutathione S-transferase Mu 4	0	6.23348	0	4.5286	8.01842	5.10126	0	0	0	9.33635	0	7.49863	3.1438	0	2.48557	9.85224	7.52364
GSTO1	Glutathione S-transferase omega-1	79.3278	101.796	31.4568	0	12.8525	18.0417	17.0799	31.5999	16.2651	19.3543	0	19.7052	38.208	0	21.1605	34.248	36.9512
GSTP1	Glutathione S-transferase P	0	1.66737	1.66737	1.66737	0	0	0	0	0	0	0	0	1.54972	0	0	1.80898	0
GSTT1	Glutathione S-transferase theta-1	143.756	13.1926	0	254.252	0	56.0631	6.54915	7.15461	2.06375	3.8254	0	15.9765	2.04623	4.66152	20.9376	2.72229	0
GSTT2	Glutathione S-transferase theta-2	239.18	7.41363	0	135.134	0	0	0	0	0	0	0	0	0	0	73.8459	11.661	0
GSTZ1	Maleylacetoacetate isomerase	0	0.639339	0.639339	0.639339	0	0	0	0	0	0	0	0	2.58021	0	0	0	0
GTDC1	Glycosyltransferase-like domain-containing protein 1;Isoform of Q4AE62, Isoform 2 of Glycosyltransferase-like domain-containing protein 1	0	1.10645	1.10645	1.10645	0	0	0	0	0	0	0	0	0	0	0	0	0
GTF2F1	General transcription factor IIF subunit 1	0	5.7827	0	0	6.88793	2.84366	0	0	0	0	0	0	7.04944	0	1.08824	41.251	2.23681
GTF2F2	General transcription factor IIF subunit 2	8.16254	31.8149	0	0	19.7056	13.8509	0	0	2.96726	5.18892	0	0	19.4785	0	5.8739	0	9.26463
GTF3C6	General transcription factor 3C polypeptide 6	0	0	0	0	0	0	0	0	0	0	0	1.58009	0	0	0	0	0
GTPBP1	GTP-binding protein 1	0	4.63053	6.39904	4.63053	0	1.50168	0	0	1.35474	0	0	0	1.08232	0	0.869815	1.32781	2.13564
GTPBP10	GTP-binding protein 10	0	0	0	0	0	0	0	0	0	0	0	0	0	0	0	0	46.0817
GTPBP4	GTP-binding protein 4;Isoform of Q9BZE4, Isoform 2 of GTP-binding protein 4	5.03762	0	3.28182	0	3.89125	4.06797	0	0	0	9.06728	0	3.97724	3.89811	0	3.68406	7.53242	3.67222
GUCY1A1	Guanylate cyclase soluble subunit alpha-1	0	25.2773	0	0	13.0644	0	0	0	0	0	0	0	0	0	0	13.4102	0
GUCY1B1	Guanylate cyclase soluble subunit beta-1	0	0	0	38.5979	11.0481	25.5492	35.1953	0	22.9433	69.4508	46.7617	13.5669	16.9026	47.8991	16.6581	47.4608	0
GUF1	Translation factor GUF1, mitochondrial	7.3642	5.22915	0	11.0526	5.03604	8.59364	10.9543	15.9656	8.36289	16.1465	16.1395	14.3543	24.4261	27.0787	11.1308	23.0216	14.9806
GYG1	Glycogenin-1;Isoform of P46976, Isoform GN-1 of Glycogenin-1	0	11.6689	26.4372	181.704	7.05324	7.39226	27.554	63.1227	0	40.2881	92.5316	30.6113	6.68582	41.3644	0	6.16219	0
GYS1	Glycogen [starch] synthase, muscle	628.24	377.078	658.893	441.636	449.561	539.731	468.581	524.669	395.054	918.496	359.244	730.099	578.036	761.601	540.912	676.916	444.455
H1-0	Histone H1.0	600.655	230.161	191.036	212.943	191.862	255.198	411.04	285.618	411.582	145.103	479.06	228.025	202.327	108.599	360.601	342.007	437.651
H1-10	Histone H1.10	31.9908	10.3808	10.3808	10.3808	3.75568	13.3407	32.7933	23.088	27.2494	8.82424	0	13.6421	7.71888	14.9564	45.3134	19.7895	42.4843
H1-2	Histone H1.2	0	1.75037	1.75037	1.75037	7.01922	7.52449	4.79275	9.71372	1.79952	3.06886	0	0	3.79975	0	4.86325	13.9938	3.36921
H1-4	Histone H1.4	2330.91	6250.73	1554.23	996.929	5916.83	8077.51	4791.64	7232.46	6606.27	12725.6	4167.64	8505.15	4115.8	2908.89	15875.5	17172.6	19249.9
H1-5	Histone H1.5	45.3341	24.6849	33.1295	40.3148	17.1549	21.2069	29.6678	61.2753	14.1957	49.2014	0	44.3386	18.124	215.391	26.4075	100.516	131.229
H2AC20;H2AC19	Histone H2A type 2-C;Histone H2A type 2-A	17307.1	24993.7	12586.8	4762.82	23702.2	34584.2	26295.7	5942.73	50240.8	4231.33	5999.16	19805.3	34574.4	6234.87	35977.1	49083.4	19771
H2AC21	Histone H2A type 2-B	174.432	90.2466	122.72	112.012	105.097	147.359	218.215	113.445	63.7465	33.8359	93.3018	104.275	100.683	66.1953	59.666	71.5047	104.479
H2AC8;H2AC25;H2AC6	Histone H2A type 1-B/E;Histone H2A type 3;Histone H2A type 1-C	0	12.2386	10.2333	10.2333	12.0862	31.0297	49.6803	4.37105	43.7679	3.98361	0	6.2977	15.7346	0	16.5168	31.1197	13.8621
H2AX	Histone H2AX	64.1986	7.58108	6.12371	6.12371	8.32317	16.405	18.2299	0	23.6732	0	0	8.35953	11.7694	0	13.1319	18.7471	10.3283
H2AZ2	Isoform of Q71UI9, Isoform 4 of Histone H2A.V	105.227	59.3241	89.622	46.2982	44.2883	48.9979	73.1113	65.6577	25.3196	36.8788	44.6365	74.0426	40.8277	26.9915	31.7122	34.0592	63.2016
H2BC12;H2BC12L;H2BC10	Histone H2B type 1-K;Histone H2B type F-S;Histone H2B type 1-C/E/F/G/I	826.657	28895.5	18252.2	9212.22	28568.6	37357.5	28634.2	17506	60374.9	14321.1	17325.7	32239	33354.5	11588.5	50608.9	81065.3	45157.3
H2BC26	Histone H2B type 3-B	0	5619.93	2665.11	244.999	7095.59	9753.88	4623.65	2828.04	20149.1	2365.25	376.435	4693.34	8934.18	1268.02	16738.9	19316.8	10107.1
H3-3B	Histone H3.3	808.957	11543.3	6972.92	4609.61	16691.2	18099.9	14255.6	9446.82	36237.3	7458.94	9751.92	12746.2	21520.6	5863.1	27041.2	52352.2	21189.9
H3-7	Histone H3-7	278.052	106.299	197.385	212.698	132.035	131.758	201.783	167.373	35.6251	26.6181	123.82	154.199	150.645	39.0775	43.5338	18.851	106.128
H4C16	Histone H4	673.326	13602.9	10471.6	5501.28	12430.5	20472.8	15566.3	11646.2	39224.4	9738.17	8852.99	15124.5	21815	8694.15	32600.7	43294.7	24195.1
H6PD	GDH/6PGL endoplasmic bifunctional protein;Isoform of O95479, Isoform 2 of GDH/6PGL endoplasmic bifunctional protein	0	9.4478	0	0	10.8091	0	0	0	5.0589	0	0	0	0	0	0	0	23.2235
HABP2	Hyaluronan-binding protein 2;Isoform of Q14520, Isoform 2 of Hyaluronan-binding protein 2	15.8937	7.96399	0	14.3009	4.69774	0	0	0	0	6.48899	7.08093	6.71401	7.58848	3.50532	0	3.72851	3.90776
HACD1	Very-long-chain (3R)-3-hydroxyacyl-CoA dehydratase 1	48.1865	14.4654	55.5283	37.6499	22.7609	15.87	82.354	109.317	38.3315	52.1287	78.5941	43.4592	26.5372	87.4837	28.0173	28.6705	28.9287
HACD3	Very-long-chain (3R)-3-hydroxyacyl-CoA dehydratase 3	0	0	0	14.1861	0	0	0	29.6132	0	0	0	0	0	0	16.1112	0	0
HADH	Hydroxyacyl-coenzyme A dehydrogenase, mitochondrial	62.2767	65.408	59.6231	87.2698	106.045	78.0508	42.9719	115.023	77.5276	241.311	104.904	97.5173	156.119	80.5986	87.5038	156.904	59.2009
HADHA	Trifunctional enzyme subunit alpha, mitochondrial	872.018	723.321	1060.51	1068.23	398.097	466.313	318.189	630.066	222.309	958.467	513.559	677.613	497.341	569.413	450.118	627.097	478.882
HADHB	Trifunctional enzyme subunit beta, mitochondrial	825.896	744.785	997.963	835.726	376.001	406.235	269.702	635.456	244.544	894.493	480.386	583.689	512.69	570.463	367.389	619.348	423.183
HAGH	Isoform of Q16775, Isoform 2 of Hydroxyacylglutathione hydrolase, mitochondrial	71.4703	59.5842	83.1026	100.061	42.8834	43.3289	66.4943	79.7234	51.1984	75.9761	91.7889	57.2508	73.8847	79.7861	40.8721	246.851	56.8497
HARS1	Histidine--tRNA ligase, cytoplasmic;Isoform of P12081, Isoform 4 of Histidine--tRNA ligase, cytoplasmic	19.7118	13.2413	13.2225	23.1028	9.74516	6.96751	14.7565	0	2.89372	14.1931	20.7391	8.18054	13.3277	8.25709	4.18626	9.13976	6.06776
HARS2	Histidine--tRNA ligase, mitochondrial;Isoform of P49590, Isoform 2 of Histidine--tRNA ligase, mitochondrial	0	8.13076	10.5151	8.13076	0	0	0	0	0	0	0	0	0	0	0	0	0
HAS1	Hyaluronan synthase 1	22.9311	32.6987	18.206	26.5867	25.1645	23.0716	0	27.2889	0	30.6604	19.1069	18.2466	24.4317	0	18.1437	0	0
HAT1	Histone acetyltransferase type B catalytic subunit	0	0	0	0	0	0	0	0	0	0	0	0	1.58509	0	0	0	0
HAX1	HCLS1-associated protein X-1;Isoform of O00165, Isoform 2 of HCLS1-associated protein X-1	0	0	7.18811	11.3832	0	0	8.47002	7.68574	0	6.62487	21.9984	0	2.78391	7.70774	0	1.82572	0
HBA2	Hemoglobin subunit alpha	850.013	350.858	400.05	2645.23	788.295	706.769	670.941	946.424	609.195	697.071	1254.85	1343.33	562.801	699.725	1100.85	1567.6	945.428
HBB	Hemoglobin subunit beta	607.89	615.504	524.825	919.315	1237.05	801.267	750.213	1051.69	865.877	776.743	947.088	1893.14	808.639	804.687	1560.37	2243.55	1202.62
HBD	Hemoglobin subunit delta	146.563	5.85775	14.4416	90.4616	16.4017	18.5429	8.88351	15.0934	13.635	13.2001	13.5204	20.2947	13.6979	13.2473	30.0626	37.071	10.9882
HBG1	Hemoglobin subunit gamma-1	5.1183	4.54078	0	261.556	68.4524	0	0	0	0	2.21706	1014.12	0	0	0	3.51016	8.53955	17.6656
HBS1L	HBS1-like protein	51.2183	33.3143	32.9849	16.837	7.75334	6.22698	20.5676	15.9693	5.24875	12.3276	13.6738	14.6684	4.15867	17.5561	10.1772	13.2171	17.7717
HBZ	Hemoglobin subunit zeta	0	0	0	130.606	0	0	0	85.6024	0	0	0	0	0	0	0	0	0
HCCS	Holocytochrome c-type synthase	29.176	18.9509	26.6449	35.6176	23.6749	3.44173	0	27.8988	8.39375	14.8654	0	13.5638	22.9697	16.7968	10.5227	15.9014	6.61955
HCFC1	Host cell factor 1;Isoform of P51610, Isoform 2 of Host cell factor 1;Isoform of P51610, Isoform 4 of Host cell factor 1	0	2.30479	2.30479	2.30479	1.45509	1.22964	0	0	0	0	0	0	0	0	1.68549	2.43969	0
HDAC2	Histone deacetylase 2	8.81912	5.52117	8.89436	0	3.57593	3.4864	0	0	18.9433	9.92607	0	8.32112	6.05277	0	3.11191	11.2625	8.69217
HDAC4	Histone deacetylase 4	0	0	0	0	0	0	0	0	0	0	0	0	0.829	0	0	0	0
HDAC6	Histone deacetylase 6	0	9.97541	43.3126	118.731	4.17147	0	34.8325	66.7246	0	11.7646	0	22.2424	5.79501	54.029	0	0	0
HDDC2	5'-deoxynucleotidase HDDC2	0	0	0	0	0	0	0	0	0	0	0	0	0	73.5575	0	0	0
HDGF	Hepatoma-derived growth factor	0	27.1851	0	0	160.32	86.3132	64.6077	0	0	0	0	127.404	25.302	0	113.195	43.2748	6.37571
HDGFL2	Hepatoma-derived growth factor-related protein 2	50.0294	64.1846	45.2704	39.0629	61.8997	53.1835	76.2403	22.5261	31.6852	34.2987	63.3126	24.563	103.838	33.2145	43.0355	274.243	47.5585
HDGFL3	Hepatoma-derived growth factor-related protein 3	6.8537	28.7959	11.2983	0	24.7508	23.2315	2.80017	13.778	20.3871	31.2376	0	14.2194	34.4552	21.0391	19.1967	48.9931	44.4865
HDHD2	Haloacid dehalogenase-like hydrolase domain-containing protein 2	36.4188	0	320.712	186.967	0	38.254	0	0	0	0	0	235.984	0	0	37.6727	0	0
HDHD3	Haloacid dehalogenase-like hydrolase domain-containing protein 3	0	0	0	0	0	0	0	0	0	0	0	0	0.661538	0	0	0	0
HDHD5	Haloacid dehalogenase-like hydrolase domain-containing 5;Isoform of Q9BXW7, Isoform 1 of Haloacid dehalogenase-like hydrolase domain-containing 5	0	11.4375	0	0	8.93694	11.1501	0	21.0129	0	14.4237	0	10.5653	7.75987	19.4997	0	13.5967	0
HDLBP	Vigilin	7.11419	14.0259	32.4575	0	3.46329	2.34141	16.1616	8.94923	0	0	0	7.79259	2.90506	316.539	0	12.7302	16.4296
HEATR1	HEAT repeat-containing protein 1	0	0	0	0	0	4.1075	0	0	0	0	0	0	0	0	0	4.78779	0
HEATR5B	HEAT repeat-containing protein 5B	0	0	5.8927	5.8927	0	4.18965	6.07973	3.27858	3.18608	1.62471	0	0	6.04164	2.73544	2.47245	4.45077	6.51071
HEATR6	HEAT repeat-containing protein 6	0	0	0	0	1.74739	0	0	0	0.680231	0	0	0	0	0	2.13908	2.13715	1.16581
HEBP2	Heme-binding protein 2	0	13.6877	13.6877	13.6877	0	0	0	0	0	0	0	0	0	0	0	0	0
HECTD1	E3 ubiquitin-protein ligase HECTD1	220.763	22.8524	50.5376	191.058	0	0	0	0	0	0	55.4358	0	17.5087	0	22.9893	9.67019	40.3579
HECTD3	E3 ubiquitin-protein ligase HECTD3	4.56799	5.44165	4.43215	0	3.20471	8.19931	0	0	4.24479	5.55491	0	9.81707	2.7043	0	6.4987	7.61263	5.25809
HERC1	Probable E3 ubiquitin-protein ligase HERC1	41.7855	8.93369	36.5186	43.7687	29.234	44.4096	57.9942	15.0829	62.4822	99.375	85.8598	55.0278	36.8345	84.8843	41.5649	72.1497	35.1502
HERC2	E3 ubiquitin-protein ligase HERC2	0	9.64786	0	0	6.84367	7.34814	0	0	2.1026	0	0	57.5681	18.3508	0	20.1663	25.6764	9.61232
HERC4	Probable E3 ubiquitin-protein ligase HERC4;Isoform of Q5GLZ8, Isoform 2 of Probable E3 ubiquitin-protein ligase HERC4	0	0	4.45056	12.4929	5.76353	5.19729	0	0	0	5.14964	0	30.1288	7.92053	7.63356	3.18733	5.45299	8.64427
HEXA	Beta-hexosaminidase subunit alpha	0	25.2948	28.0682	0	0	0	18.5389	0	0	17.8352	0	20.262	0	22.4247	0	0	0
HEXB	Beta-hexosaminidase subunit beta	0	0	0	0	0	0	0	0	4.02676	0	19.2571	0	0	6.77528	5.04228	9.67241	10.2454
HEXD	Hexosaminidase D	0	0	8.11736	0	0	0	0	0	0	0	0	5.55753	0	8.94391	0	0	0
HEXIM1	Protein HEXIM1	4.14215	0	0	0	0	0	0	0	0	0	0	0	1.53163	0	0	0	0
HGH1	Protein HGH1 homolog	0	3.37156	0	0	1.88577	0	0	0	0	0	0	0	3.59463	0	1.5701	4.914	0
HGS	Hepatocyte growth factor-regulated tyrosine kinase substrate	0	0	47.6776	118.622	0	0	0	0	0	25.4611	0	8.03863	0	0	0	0	0
HHATL	Protein-cysteine N-palmitoyltransferase HHAT-like protein	333.523	131.744	362.84	193.715	100.992	100.757	434.795	578.077	147.862	489.077	440.443	209.982	120.491	449.291	125.005	180.441	205.082
HHLA2	HERV-H LTR-associating protein 2	0	0	0	0	0	0	0	0	0	0	3.63739	0	0	0	0	0	0
HIBADH	3-hydroxyisobutyrate dehydrogenase, mitochondrial	0	13.126	11.4899	23.2951	19.0629	6.22554	0	0	6.30603	20.0391	10.3345	0	28.8905	13.2565	5.88067	30.0078	6.74106
HIBCH	3-hydroxyisobutyryl-CoA hydrolase, mitochondrial	28.0818	33.0393	34.8109	57.3145	31.4912	10.2183	12.3164	34.7365	10.1171	81.3911	39.7183	26.0065	36.4716	54.9322	20.5034	56.3942	44.221
HIF1AN	Hypoxia-inducible factor 1-alpha inhibitor	0	2.91965	2.91965	2.91965	0	0	0	0	0	0	0	0	0	0	0	0	0
HIGD1A	HIG1 domain family member 1A, mitochondrial	12.0566	0.605523	4.69261	10.1196	0	0	6.37066	4.50491	0.964176	8.46403	0	3.22019	0	9.55712	0	1.16959	0.983849
HIGD2A	HIG1 domain family member 2A, mitochondrial	33.863	5.17405	14.296	45.1195	5.43737	3.87416	14.9653	27.1572	4.49942	16.2098	38.8857	15.7827	3.49747	25.4055	3.77682	0	5.31898
HIKESHI	Protein Hikeshi	0	0	0	0	0	0	0	0	0	0	0	0	0	0	0	0	4.76462
HINT1	Adenosine 5'-monophosphoramidase HINT1	0	19.7802	16.5468	18.1578	5.91002	6.02389	0	22.8868	3.03988	0	8.10943	15.2891	9.45267	3.11765	4.18916	7.40687	5.82141
HINT3	Adenosine 5'-monophosphoramidase HINT3	8.04313	14.8981	12.0452	8.5677	2.50893	0	0	0	0	0	0	5.46867	9.74214	0	1.09806	2.71041	5.05159
HIP1	Isoform of O00291, Isoform 3 of Huntingtin-interacting protein 1	0	0	0	2.27229	0	0	0	0	0	0	0	0	0	0	0.717838	0	0
HK1	Isoform of P19367, Isoform 3 of Hexokinase-1	59.9688	79.4568	57.1235	76.9776	62.2858	51.9131	38.2459	63.4433	24.3869	66.9079	54.6752	67.1401	83.5131	53.3737	37.69	76.707	83.4119
HK2	Hexokinase-2	0	8.46313	15.7512	0	5.26367	7.59237	0	0	0	22.7707	0	13.3132	13.2481	0	10.1071	1.26805	5.788
HLA-A	HLA class I histocompatibility antigen, A alpha chain	0	0	0	0	0	0	0	0	0	0	0	0	0	0	0	0	7.38632
HLA-A;HLA-A;HLA-A;HLA-A	Isoform of P04439, HLA class I histocompatibility antigen, A alpha chain;Isoform of P04439, HLA class I histocompatibility antigen, A alpha chain;Isoform of P04439, HLA class I	0	0	0	0	0	22.0738	0	0	0	0	0	0	0	0	0	0	0
HLA-B	HLA class I histocompatibility antigen, B alpha chain	0	6.97479	0	0	0	0	0	4.63432	0	11.9475	0	0	0	12.0622	0	17.0426	6.42286
HLA-C	HLA class I histocompatibility antigen, C alpha chain	0	0	0	0	0	0	0	0	0	4.49446	0	0	1.63363	0	0	0	3.68153
HLA-DRB1	HLA class II histocompatibility antigen, DRB1 beta chain	0	5.38308	0	0	3.12312	0	0	0	2.39363	0	0	0	0	0	3.40978	0	0
HLA-DRB1	Isoform of P01911, HLA class II histocompatibility antigen DR beta chain	0	0	0	0	0	0	11.9147	0	0	0	0	0	0	0	0	0	0
HM13	Isoform of Q8TCT9, Isoform 2 of Minor histocompatibility antigen H13;Isoform of Q8TCT9, Isoform 4 of Minor histocompatibility antigen H13	11.6527	1.06177	3.90944	8.42489	0	0	3.99011	8.18061	0	5.84625	6.67099	1.5427	0	9.92036	0	0	0
HMCN2	Hemicentin-2	7.46664	2.71413	18.9415	24.9381	2.97022	3.68873	18.9664	28.7466	3.01478	17.4774	40.9063	14.1313	2.34452	27.8117	0	7.06537	2.76648
HMGA1	High mobility group protein HMG-I/HMG-Y;Isoform of P17096, Isoform HMG-R of High mobility group protein HMG-I/HMG-Y	8.64222	25.2366	24.7238	25.2366	45.5081	42.7442	8.57402	0	35.0232	24.5006	5.66096	19.9013	48.8489	14.741	28.9152	161.003	16.1149
HMGB1	High mobility group protein B1	64.6733	693.954	460.272	187.873	403.635	462.038	170.014	345.053	640.702	185.429	175.182	303.936	424.673	260.812	605.657	653.033	650.172
HMGB2	High mobility group protein B2	59.5148	100.515	72.5796	63.2942	165.916	123.959	66.4943	69.2605	153.835	205.153	69.9504	87.0326	171.102	128.241	125.466	379.083	118.257
HMGB3	High mobility group protein B3	0	2.67258	2.67258	2.67258	12.9894	0	0	0	0	0	0	0	16.9728	0	5.53766	281.148	10.5179
HMGCL	Hydroxymethylglutaryl-CoA lyase, mitochondrial	179.277	21.0006	74.0482	258.324	16.6414	18.2254	0	301.638	6.37905	0	601.853	0	25.7902	251.031	18.3623	21.406	24.9418
HMGCS2	Hydroxymethylglutaryl-CoA synthase, mitochondrial	25.0683	0	46.8398	0	0	0	0	0	33.3546	0	83.1362	7.59944	0	46.1772	6.15923	9.73049	0
HMGN1	Non-histone chromosomal protein HMG-14	0	0	0	0	0	0	0	0	0	1.91636	0	0	0	0	0.602874	25.6587	3.20058
HMGN2	Non-histone chromosomal protein HMG-17	6.26362	2.21071	2.92829	7.29397	1.76477	3.86436	0	13.4861	2.35644	4.78715	0	0	1.74604	0	2.32341	43.4345	4.38458
HMGN3	Isoform of Q15651, High mobility group nucleosome-binding domain-containing protein 3	52.8841	94.0656	54.9686	32.4164	247.622	149.788	49.749	56.7004	163.967	233.979	0	54.0981	227.224	53.8676	154.713	181.524	113.3
HMGN4	High mobility group nucleosome-binding domain-containing protein 4	151.365	32.6386	128.296	128.296	42.0328	48.5487	0	0	32.2966	129.115	282.742	40.4187	37.502	94.499	52.8234	83.2789	67.5193
HMOX1	Heme oxygenase 1	2.7722	0	0	6.32942	0	0	0	12.8702	0	6.44284	13.0344	3.65159	0	1.29786	0	0	0
HMOX2	Heme oxygenase 2;Isoform of P30519, Isoform 2 of Heme oxygenase 2	5.95971	0	0	13.7108	1.11581	0	0	30.3449	0	3.04073	0	6.45479	0	3.98132	0	0	2.13318
HNRNPA0	Heterogeneous nuclear ribonucleoprotein A0	18.5108	17.4917	12.3798	0	8.43507	7.89909	6.08954	7.53851	2.92184	11.4203	23.8336	15.5161	6.22808	10.419	4.64651	13.7542	22.6062
HNRNPA1	Heterogeneous nuclear ribonucleoprotein A1;Isoform of P09651, Isoform A1-A of Heterogeneous nuclear ribonucleoprotein A1;Isoform of P09651, Isoform 2 of Heterogeneous nuclear ribonucle	0	0	0	0	0	24.5797	0	0	0	0	0	0	0	0	0	0	0
HNRNPA2B1	Heterogeneous nuclear ribonucleoproteins A2/B1	177.879	233.685	185.487	56.1389	108.116	127.373	82.1835	86.1957	40.809	140.597	47.1292	137.747	52.4269	22.9947	101.936	46.4018	111.385
HNRNPA3	Heterogeneous nuclear ribonucleoprotein A3;Isoform of P51991, Isoform 2 of Heterogeneous nuclear ribonucleoprotein A3	66.5159	61.3099	49.6838	32.4313	36.1317	35.0491	43.4395	51.1194	16.667	57.5012	30.4012	76.0995	41.2624	53.6818	24.696	52.8244	66.6543
HNRNPAB	Isoform of Q99729, Isoform 2 of Heterogeneous nuclear ribonucleoprotein A/B;Isoform of Q99729, Isoform 3 of Heterogeneous nuclear ribonucleoprotein A/B	105.639	95.2425	216.229	337.57	73.568	0	201.18	278.603	51.2574	70.1257	129.894	154.022	114.118	193.922	62.7374	82.7437	87.6452
HNRNPC	Isoform of P07910, Isoform C1 of Heterogeneous nuclear ribonucleoproteins C1/C2	269.231	186.522	229.464	84.0938	135.297	248.186	147.124	147.532	43.3068	198.416	56.0261	294.362	136.853	73.9652	144.287	71.209	175.117
HNRNPCL1	Heterogeneous nuclear ribonucleoprotein C-like 1	0	0	0	0	0	5.92076	0	0	0	0	0	0	5.22702	0	0	26.3897	0
HNRNPD	Heterogeneous nuclear ribonucleoprotein D0;Isoform of Q14103, Isoform 3 of Heterogeneous nuclear ribonucleoprotein D0	128.507	178.785	106.344	23.8267	67.42	87.7763	43.791	39.6174	28.0063	55.3066	33.6659	90.6738	42.9195	41.3835	80.617	499.614	156.073
HNRNPDL	Heterogeneous nuclear ribonucleoprotein D-like	18.2652	18.5025	38.1342	11.2529	12.6441	15.2925	15.2575	18.5817	4.72668	11.03	14.7635	20.5817	12.8043	8.92128	9.40647	20.5322	12.8863
HNRNPF	Heterogeneous nuclear ribonucleoprotein F	0	3.88178	0	0	2.79376	0	0	0	0	0	4.52575	0	0	0	0	0	3.1306
HNRNPH1	Heterogeneous nuclear ribonucleoprotein H	47.7887	37.5432	43.3725	24.8293	20.4357	22.6244	24.2988	33.3569	9.09403	28.8787	25.5735	38.7777	15.1654	23.2931	9.7505	28.6177	25.8838
HNRNPH2	Heterogeneous nuclear ribonucleoprotein H2	36.5532	31.6906	41.6692	19.6772	13.536	10.3223	20.2435	24.2151	5.33036	16.6409	33.0362	31.2451	13.2756	14.4786	7.72372	22.281	23.0424
HNRNPH3	Heterogeneous nuclear ribonucleoprotein H3;Isoform of P31942, Isoform 2 of Heterogeneous nuclear ribonucleoprotein H3	19.2542	19.455	16.4405	16.4234	17.08	14.0597	18.142	20.3698	7.15906	13.016	21.2075	19.8693	7.24193	7.08643	7.1999	8.61063	10.4215
HNRNPK	Isoform of P61978, Isoform 3 of Heterogeneous nuclear ribonucleoprotein K	182.442	116.555	167.847	107.935	128.911	118.762	109.367	86.3745	36.911	114.756	66.9561	112.819	66.6277	60.4822	43.264	44.8575	47.1008
HNRNPL	Heterogeneous nuclear ribonucleoprotein L	46.615	43.9269	55.108	30.723	28.6279	32.7173	26.4414	39.8644	16.4005	41.0371	29.0262	60.5594	26.1129	35.9689	21.2191	43.4645	32.3094
HNRNPLL	Heterogeneous nuclear ribonucleoprotein L-like;Isoform of Q8WVV9, Isoform 4 of Heterogeneous nuclear ribonucleoprotein L-like	3.73358	7.58632	0	0	0	1.27402	0	0	0	0	0	2.506	0	0	0	0	5.39173
HNRNPM	Heterogeneous nuclear ribonucleoprotein M;Isoform of P52272, Isoform 2 of Heterogeneous nuclear ribonucleoprotein M	71.7836	47.4931	55.836	59.1377	36.8883	57.2239	54.3857	59.5643	18.4738	46.5347	90.9893	68.1525	43.9394	35.4183	37.1216	31.6472	46.6905
HNRNPR	Heterogeneous nuclear ribonucleoprotein R	168.587	133.208	181.224	102.651	152.016	143.972	115.448	156.814	98.0294	241.589	120.751	197.962	163.476	162.415	106.176	300.701	189.858
HNRNPR	Isoform of O43390, Isoform 4 of Heterogeneous nuclear ribonucleoprotein R	44.1901	18.7945	18.7945	18.7945	20.2483	14.675	35.8661	39.6539	21.3283	35.8903	0	28.8458	14.8236	0	13.7539	21.8341	24.3797
HNRNPU	Heterogeneous nuclear ribonucleoprotein U	94.0211	73.626	83.6209	67.4317	79.2298	62.8749	41.9165	51.2254	20.4106	110.555	48.7293	78.5203	69.6874	61.1121	39.6759	96.7464	62.8389
HNRNPUL1	Heterogeneous nuclear ribonucleoprotein U-like protein 1;Isoform of Q9BUJ2, Isoform 2 of Heterogeneous nuclear ribonucleoprotein U-like protein 1;Isoform of Q9BUJ2, Isoform 4 of Heter	0	0	0	0	0	5.38614	0	0	0	0	0	0	0	0	0	0	0
HNRNPUL2	Heterogeneous nuclear ribonucleoprotein U-like protein 2	93.503	55.2625	111.049	55.7268	97.474	99.4666	73.263	87.7578	50.3566	164.656	77.784	111.63	123.924	120.984	73.8289	157.049	92.7104
HOMER1	Homer protein homolog 1	5.78396	7.29341	4.7121	6.04594	2.0211	2.54026	4.37003	7.85752	2.21797	8.36907	6.26455	6.67393	3.76058	7.53056	1.96665	5.74427	4.49602
HOMER2	Homer protein homolog 2;Isoform of Q9NSB8, Isoform 2 of Homer protein homolog 2	0	3.56477	3.35594	3.56477	1.99292	1.36577	5.50281	0	1.82455	3.77639	0	0	3.75452	0	2.0827	5.33378	2.68737
HOMER3	Homer protein homolog 3;Isoform of Q9NSC5, Isoform 2 of Homer protein homolog 3	0	0	0	0	6.12194	0	6.01845	10.6215	3.31174	12.9562	0	6.40593	0	11.3508	0	23.4334	0
HOOK3	Protein Hook homolog 3	0	21.965	41.6979	0	31.3465	17.4332	0	37.5739	23.8757	15.8116	0	0	35.2253	32.0131	19.4056	30.0078	21.6585
HP	Haptoglobin	0	0	0	8.04756	0	0	12.4964	27.1073	23.0386	74.4521	45.5397	16.8105	4.64574	11.1359	0	50.5283	59.79
HP1BP3	Heterochromatin protein 1-binding protein 3	140.581	123.974	122.748	129.737	109.393	85.4825	129.594	158.156	65.8956	219.017	139.409	182.634	98.7767	139.26	120.622	166.163	211.996
HPRT1	Hypoxanthine-guanine phosphoribosyltransferase	0	0	0	8.0847	0	0	0	0	0	0	0	0	0.319782	0	0	1.18096	1.28094
HPX	Hemopexin	431.842	320.502	291.954	251.863	35.0743	254.728	135.764	68.9899	75.7105	152.187	192.97	71.793	174.243	67.1316	241.227	78.8197	113.508
HRC	Sarcoplasmic reticulum histidine-rich calcium-binding protein	72.1648	78.4388	67.5328	34.8228	15.8558	18.8485	14.6078	40.9907	8.165	14.6513	18.138	16.9427	22.2154	21.8991	11.0135	11.1029	17.9526
HRG	Histidine-rich glycoprotein	55.1347	25.6231	23.6273	85.0088	20.4545	22.5205	40.5681	62.185	14.9919	45.152	236.75	79.3381	19.3221	37.7248	28.1531	16.5514	26.9667
HSD17B10	3-hydroxyacyl-CoA dehydrogenase type-2	128.536	0	0	395.425	0	27.3765	0	0	0	108.612	0	0	18.7006	0	38.3466	25.1324	0
HSD17B11	Estradiol 17-beta-dehydrogenase 11	0	0	0	8.6729	0	0	0	0	0.606396	0	0	0	0	0	0	1.81859	0
HSD17B12	Very-long-chain 3-oxoacyl-CoA reductase	47.9651	17.6576	27.3033	50.7533	7.0354	12.9234	22.5676	32.6502	2.97616	25.5433	30.9378	19.4394	10.6919	31.4722	4.49497	19.7849	20.0876
HSD17B4	Peroxisomal multifunctional enzyme type 2	10.1164	17.1014	0	0	11.6785	8.66318	0	36.7947	9.52919	21.3441	0	0	11.7072	0	8.16445	39.869	14.2472
HSD17B8	(3R)-3-hydroxyacyl-CoA dehydrogenase	0	19.0867	0	0	0	0	0	0	0	0	0	0	18.1198	0	0	42.1245	28.0562
HSDL1	Inactive hydroxysteroid dehydrogenase-like protein 1	94.0644	8.5375	5.6861	52.8889	6.78873	41.2646	2.11098	0	3.45984	3.32642	0	0	6.94632	0	12.7007	5.17291	5.80668
HSDL2	Hydroxysteroid dehydrogenase-like protein 2	84.1444	98.7713	64.791	89.6735	85.3078	92.7208	41.3223	99.6978	50.6356	169.737	90.4045	84.8754	100.683	57.2305	84.5525	116.047	104.527
HSP90AA1	Heat shock protein HSP 90-alpha;Isoform of P07900, Isoform 2 of Heat shock protein HSP 90-alpha	73.2699	127.506	66.8982	52.1152	81.2061	70.2874	23.9268	58.8282	40.3791	38.4926	31.6731	43.4492	118.865	30.5582	44.7947	113.327	42.9465
HSP90AB1	Heat shock protein HSP 90-beta	217.283	383.117	227.989	187.139	253.39	231.781	62.3569	128.732	111.752	95.2527	65.3567	127.697	358.802	82.0781	149.357	308.415	153.967
HSP90AB2P	Putative heat shock protein HSP 90-beta 2	0	33.8245	25.5691	47.159	27.6114	33.0885	11.1657	14.5642	9.03975	8.49527	5.6207	18.8704	39.369	8.73428	14.8671	33.9965	10.2548
HSP90B1	Endoplasmin	0	31.3929	0	85.1264	7.53336	24.3993	0	0	67.8354	0	0	0	18.1574	79.511	0	18.9598	5.1384
HSPA12A	Heat shock 70 kDa protein 12A	5.0854	6.3978	7.89432	6.3978	0	13.9597	0	0	0	0	0	0	2.64761	0	8.10637	7.17521	0
HSPA12B	Heat shock 70 kDa protein 12B	23.1646	6.77846	12.8385	4.6544	15.3105	4.25576	8.13925	12.0944	8.11253	8.78976	14.8967	8.38652	3.79975	9.53954	4.51988	7.59163	3.95939
HSPA14	Heat shock 70 kDa protein 14	0	0	15.8568	0	0	0	0	0	0	0	0	0	0	0	0	0	0
HSPA1A	Heat shock 70 kDa protein 1A	390.414	96.857	217.227	124.987	50.1521	31.3818	93.3651	150.968	32.9197	58.5838	147.533	64.8309	50.8926	48.6886	36.8321	64.2	36.1433
HSPA2	Heat shock-related 70 kDa protein 2	167.813	147.31	122.466	101.453	34.4579	45.6644	146.381	204.544	23.4994	55.3448	110.992	87.2935	64.3657	82.5519	47.8329	35.8538	48.2979
HSPA4	Heat shock 70 kDa protein 4	0	10.0376	6.22751	6.59727	9.51237	7.56445	0	0	3.5699	5.75675	205.916	0	11.152	16.1409	3.62265	13.7384	4.76462
HSPA5	Endoplasmic reticulum chaperone BiP	58.1601	29.5074	32.1081	25.6841	18.5434	15.1	11.6435	24.7392	11.1034	14.2783	13.8258	20.3227	20.5095	11.5805	12.0262	36.4531	14.0161
HSPA6	Heat shock 70 kDa protein 6	521.225	351.505	442.603	0	104.421	100.711	293.484	519.62	62.1665	147.563	272.766	217.011	125.214	138.047	135.465	123.548	143.691
HSPA8	Heat shock cognate 71 kDa protein	1107.45	231.703	552.605	370.735	122.318	95.9792	244.898	441.963	82.3107	134.486	408.216	220.334	138.502	174.955	84.5136	165.59	106.421
HSPA9	Stress-70 protein, mitochondrial	303.407	133.024	176.082	206.806	77.5691	65.596	114.389	233.93	47.8361	129.294	161.172	130.311	116.347	111.693	58.7796	180.898	61.8341
HSPB1	Heat shock protein beta-1	2542.29	2473.61	1892.84	2455.64	944.689	909.656	1064.6	922.754	173.004	263.559	865.347	683.568	1100.41	487.896	248.157	403.12	329.404
HSPB2	Heat shock protein beta-2	10.2524	9.26682	11.2672	21.7954	12.8023	8.95318	0	14.0341	3.1605	11.7999	14.5208	12.2767	22.7434	10.4913	6.05657	11.0977	6.43618
HSPB3	Heat shock protein beta-3	16.5092	26.3956	23.5404	0	14.0439	13.2427	0	38.5288	4.66612	6.91476	0	8.29625	25.4832	0	8.53939	18.1107	8.21728
HSPB6	Heat shock protein beta-6	317.56	244.36	242.278	193.136	80.5172	162.546	116.919	194.978	39.2877	174.573	277.198	142.653	215.355	97.3705	72.967	117.229	116.099
HSPB7	Heat shock protein beta-7	278.052	95.9248	518.579	695.447	39.7547	49.0205	537.384	710.535	38.3492	383.51	1120.19	348.804	44.0306	521.708	26.8922	37.0028	34.1844
HSPB7	Isoform of Q9UBY9, Heat shock protein beta-7	0	0	0	0	0	0	9.88518	0	0	0	14.0472	0	0	0	0	0	0
HSPB7	Isoform of Q9UBY9, Isoform 2 of Heat shock protein beta-7	0	0	0	12.5998	0	0	7.816	10.4709	0	5.93987	29.9151	0	0	4.84091	0	0	0
HSPB8	Heat shock protein beta-8	156.432	51.1836	89.4777	116.86	22.0033	34.0704	165.991	137.084	27.4004	56.3868	197.102	86.3539	29.3599	78.2938	26.3467	105.983	53.2388
HSPBP1	Hsp70-binding protein 1;Isoform of Q9NZL4, Isoform 3 of Hsp70-binding protein 1	0	3.89342	167.654	0	4.25882	18.6886	0	0	0	0	0	0	4.53267	0	0	0	3.55327
HSPD1	60 kDa heat shock protein, mitochondrial	104.767	60.4827	49.6609	77.7972	45.9609	27.4396	18.6502	35.858	15.0819	33.02	32.4482	24.9794	85.5371	29.1828	25.3237	54.87	19.7119
HSPE1	10 kDa heat shock protein, mitochondrial	0	55.3517	26.2129	0	42.8735	36.5576	26.1448	0	49.8719	30.0453	0	19.2789	73.2579	43.8255	51.6448	175.523	17.9279
HSPG2	Basement membrane-specific heparan sulfate proteoglycan core protein	999.828	94.8704	669.599	910.257	122.939	146.547	1027.51	984.205	82.5764	497.711	1545.93	724.406	91.8448	647.481	59.7622	196.804	47.8551
HTATSF1	HIV Tat-specific factor 1	0	7.54625	21.5236	7.54625	0	0	0	0	0	0	0	0	0	0	0	64.1409	10.7852
HTD2	Hydroxyacyl-thioester dehydratase type 2, mitochondrial	10.2123	13.7477	7.93076	5.35136	2.42543	5.74351	0	3.76778	2.76412	6.44877	2.37077	9.15971	1.85889	2.62438	5.42909	0	14.3492
HTRA1	Serine protease HTRA1	0	0	0	0	0	0	4.77512	0	0	4.54231	0	0	0	7.16188	0	0	2.97323
HUWE1	E3 ubiquitin-protein ligase HUWE1;Isoform of Q7Z6Z7, Isoform 2 of E3 ubiquitin-protein ligase HUWE1	11.1052	9.61902	13.7821	20.5951	10.7768	67.0621	4176.23	0	8.28812	0	22.5056	1779.02	15.3729	58.7662	0	46.5088	11.208
HYCC1	Isoform of Q9BYI3, Isoform 3 of Hyccin	0	2.9426	0	0	0	1.55983	0	0	0	0	0	0	0	0	0	2.2617	0
HYOU1	Hypoxia up-regulated protein 1	0	0	0	0	5.00137	0	0	0	0	0	0	0	6.75234	0	0	0	0
HYPK	Huntingtin-interacting protein K	11.5618	20.241	24.3173	19.5913	14.9241	24.0922	10.0945	34.3863	8.97132	14.6109	27.5353	42.1388	11.8374	0	39.0775	9.69694	0
IARS1	Isoleucine--tRNA ligase, cytoplasmic	17.0108	11.2339	18.2018	21.437	13.5765	12.2033	14.9171	12.7522	11.8156	20.9738	15.6744	19.2036	20.0657	24.3236	12.7212	30.6644	14
IARS2	Isoleucine--tRNA ligase, mitochondrial	18.6434	30.7702	21.8582	26.5683	19.0497	10.4659	5.85173	11.9753	4.57779	22.8864	7.58211	18.4621	32.0224	15.9819	9.186	19.0913	16.3466
IBA57	Putative transferase CAF17, mitochondrial	0	0	0	0	0	0	0	0	0	0	0	0	0	0	0	0	3.95574
ICAM1	Intercellular adhesion molecule 1	21.3415	0	0	17.9087	0	0	12.0972	22.6875	0	0	0	16.0798	0	0	0.36377	12.6863	16.0372
ICMT	Protein-S-isoprenylcysteine O-methyltransferase	0	1.04648	1.04648	4.78811	0	0	3.12165	4.10852	0	6.14012	5.16167	2.49794	0	4.32541	0	0	0
ICOSLG	ICOS ligand;Isoform of O75144, Isoform 2 of ICOS ligand	19.885	0	0	0	0	0	0	0	0	0	0	0	0	0	0	0	0
IDE	Insulin-degrading enzyme	25.2072	24.9937	38.6024	22.9332	23.2375	17.7573	9.35803	0	4.26831	22.018	3.89933	19.4394	34.5983	16.4145	10.3497	15.5896	8.9997
IDH1	Isocitrate dehydrogenase [NADP] cytoplasmic	30.8905	17.9404	7.46302	5.17207	7.59607	3.08161	0	0	2.49205	2.60962	0	3.5578	10.7091	0	2.78629	4.09576	4.71008
IDH2	Isocitrate dehydrogenase [NADP], mitochondrial	489.807	605.802	398.671	1022.5	423.925	238.494	181.211	396.265	172.686	818.799	481.937	390.735	534.878	242.118	271.348	518.125	448.155
IDH3A	Isocitrate dehydrogenase [NAD] subunit alpha, mitochondrial	37.1985	62.077	40.2731	69.4007	23.3018	16.3447	26.9268	31.5345	8.62693	19.2521	35.3175	26.0245	47.7589	22.2089	19.1614	20.8658	28.9353
IDH3B	Isocitrate dehydrogenase [NAD] subunit beta, mitochondrial	28.0818	34.9487	20.4134	37.219	14.0342	12.6788	20.1876	36.4071	9.55776	23.2636	45.771	20.9162	30.6941	37.4393	11.2416	13.9263	17.0816
IDH3G	Isoform of P51553, Isoform 2 of Isocitrate dehydrogenase [NAD] subunit gamma, mitochondrial	59.3916	45.8491	33.1906	81.2951	29.4977	21.413	37.4097	72.0254	17.0042	45.4964	129.745	38.742	39.8983	72.9	16.2415	66.7167	27.1724
IDI2	Isopentenyl-diphosphate delta-isomerase 2	14.5588	1.72278	0	11.2451	1.94262	0	8.86308	15.9326	3.83404	7.41613	13.2248	9.25512	6.44102	13.0265	2.28785	3.85687	1.41686
IER3IP1	Immediate early response 3-interacting protein 1	0	4.79547	25.5514	80.0505	2.96271	0	9.41206	44.339	0	31.3601	24.6939	4.46459	2.59152	36.6461	2.0106	5.83223	3.01806
IFI16	Gamma-interferon-inducible protein 16;Isoform of Q16666, Isoform 2 of Gamma-interferon-inducible protein 16;Isoform of Q16666, Isoform 3 of Gamma-interferon-inducible protein 16	24.89	27.7607	30.2214	0	13.9473	22.6036	11.4996	7.14144	12.3071	24.79	0	27.5411	34.774	46.2091	27.2852	62.6664	25.9614
IFIT1	Interferon-induced protein with tetratricopeptide repeats 1	0	0	0	0	0	0	0	0	0	0	0	0	0	0	0	3.37004	1.30957
IFIT3	Interferon-induced protein with tetratricopeptide repeats 3	11.226	9.61902	9.61902	9.38565	4.51013	5.96455	7.70166	15.6058	2.17649	9.10494	7.91207	9.99038	4.8602	7.82577	4.31347	8.55529	7.64061
IFITM3	Interferon-induced transmembrane protein 3	0	0	0	0	0	0	0	0	0	0	0	0	0	0	0	0	1.30806
IFNGR1	Interferon gamma receptor 1	21.1167	0	8.19624	18.3048	0	0	8.94921	16.6298	0	11.9944	31.8926	5.62188	0.776166	18.1396	0	0	0
IFRD2	Interferon-related developmental regulator 2;Isoform of Q12894, Isoform 2 of Interferon-related developmental regulator 2	0	2.2784	0	5.61777	2.43326	0	5.07791	0	2.06707	3.59565	0	0	2.95294	0	1.98485	0	2.95412
IGBP1	Immunoglobulin-binding protein 1	0	0	0	0	0	0	0	0	0	0	0	0	0	0	29.3377	0	0
IGF2R	Cation-independent mannose-6-phosphate receptor	26.2377	0	7.27469	10.2368	0	0	11.5368	13.8895	5.59443	10.8138	0	4.11701	4.28405	6.86637	0	0	0
IGFBP5	Insulin-like growth factor-binding protein 5	22.2651	36.1602	33.8466	29.6664	73.1962	20.6718	16.3864	38.6443	27.1804	44.6763	27.51	23.1943	65.5473	50.8425	36.3017	16.1189	59.5838
IGFBP7	Insulin-like growth factor-binding protein 7;Isoform of Q16270, Isoform 2 of Insulin-like growth factor-binding protein 7	0	0	0	0	0	0	0	0	0	0	88.3874	0	0	0	0	0	0
IGFN1	Isoform of Q86VF2, Isoform 5 of Immunoglobulin-like and fibronectin type III domain-containing protein 1	0	0	0	0	2.68033	4.67388	0	88.3458	0	0	0	0	0	0	0	5.77344	0
IGHV1-18	Immunoglobulin heavy variable 1-18	0	1.57482	1.57482	1.57482	3.90921	1.40016	2.15866	0	3.52416	0	0	0	2.49089	0	2.07839	3.55496	4.40584
IGHV1-69	Immunoglobulin heavy variable 1-69	0	0	2.11794	2.11794	0	0	0	0	5.73794	0	0	0	0	0	0	9.4566	0
IGHV3-30	Immunoglobulin heavy variable 3-30	0	15.9049	0	0	4.00672	0	0	0	7.0284	16.737	0	18.8054	111.984	0	5.60566	17.0543	5.59407
IGHV3-7	Immunoglobulin heavy variable 3-7	0	0	0	0	0	0	0	0	0	0	0	0	6.80541	18.2906	0	0	0
IGKV1-5	Immunoglobulin kappa variable 1-5	0	0	0	0	0	0	0	0	0	0	0	0	0	0	0	8.53561	0
IGKV1-6	Immunoglobulin kappa variable 1-6	0	0	0	0	0	0	0	0	0	0	7.88116	0	0	0	0	0	0
IGKV3-15	Immunoglobulin kappa variable 3-15	0	0	0	0	0	0	0	0	4.3257	0	0	0	14.1467	0	0	12.093	0
IGKV3-20	Immunoglobulin kappa variable 3-20	0	0	0	0	0	0	23.0985	0	0	6.5415	64.6383	6.05734	0	0	0	0	0
IGKV4-1	Immunoglobulin kappa variable 4-1	0	0	0	0	0	0	3.23731	0	3.3671	0	7.56293	0	0	0	0	3.72679	0
IGLL5	Immunoglobulin lambda-like polypeptide 5	42.0557	6.87434	15.3998	18.9524	9.30441	8.55613	41.6087	9.65574	16.3816	8.15976	99.0809	14.8007	5.69711	6.48675	12.3006	19.518	7.56185
IGSF8	Immunoglobulin superfamily member 8;Isoform of Q969P0, Isoform 3 of Immunoglobulin superfamily member 8	0	0	0	6.46493	0	5.25022	0	0	0	0	0	0	0	0	0	0	0
IK	Protein Red	9.08292	10.3236	10.3236	81.0334	16.4736	17.7083	0	0	13.4541	23.7507	0	9.70693	18.5675	12.0928	17.7226	19.9404	12.2808
IKBIP	Inhibitor of nuclear factor kappa-B kinase-interacting protein	0	0	0	0	0	0	0	0	0	0	0	0	3.67413	0	0	4.78118	0
IKBKB	Inhibitor of nuclear factor kappa-B kinase subunit beta	0	0	0	0	0	0	0	0	0	0	0	5.40981	0	0	0	0	0
ILF2	Interleukin enhancer-binding factor 2	11.1873	8.9832	10.5176	0	10.5825	3.15339	0	0	2.7068	6.16279	0	0	7.72066	3.79251	3.67136	8.6863	9.09972
ILF3	Isoform of Q12906, Isoform 4 of Interleukin enhancer-binding factor 3;Isoform of Q12906, Isoform 6 of Interleukin enhancer-binding factor 3;Isoform of Q12906, Isoform 7 of Interleukin enha	0	0	0	0	0	13.8509	0	0	0	0	0	0	0	0	0	0	0
ILK	Integrin-linked protein kinase	20.3904	14.96	18.1391	23.0178	8.87746	9.25289	15.233	19.651	8.54193	16.6294	27.7262	14.1639	14.3336	15.1191	6.81439	46.9607	18.1146
ILVBL	2-hydroxyacyl-CoA lyase 2	0	5.17048	6.57831	5.17048	3.78782	0	4.69877	12.5657	3.6204	9.52088	0	4.03814	0	6.83797	5.44035	7.31198	5.44037
IMMT	Isoform of Q16891, Isoform 2 of MICOS complex subunit MIC60	578.929	127.947	428.76	747.247	50.9787	80.7937	487.287	802.39	74.7061	431.099	1158.75	249.564	101.778	822.105	71.9659	118.341	102.054
IMMT	Isoform of Q16891, Isoform 3 of MICOS complex subunit MIC60	106.372	17.6983	60.2025	162.242	4.89315	10.3366	61.558	174.818	7.03973	100.526	186.634	40.9244	14.1793	204.516	6.73638	24.9939	11.8749
IMMT	Isoform of Q16891, Isoform 4 of MICOS complex subunit MIC60	22.4505	3.58369	10.5151	25.6723	1.94352	1.87102	19.6193	30.9447	1.10422	8.87518	52.9042	0	2.07709	18.9246	1.24832	1.38209	2.2549
IMMT	Isoform of Q16891, MICOS complex subunit MIC60	94.9348	0	0	118.322	0	0	0	0	0	53.9234	158.23	0	14.1565	135.309	0	0	0
IMPA1	Isoform of P29218, Isoform 3 of Inositol monophosphatase 1	0	26.9359	0	0	0	0	0	0	0	15.692	0	0	8.05294	0	0	6.9492	13.3761
IMPA2	Inositol monophosphatase 2	13.8875	36.2853	31.8797	36.2853	10.9898	5.94809	6.03093	0	0	0	0	29.6539	25.6481	0	10.9	13.6375	22.2653
IMPACT	Protein IMPACT	7.94923	0	0	0	0	0	0	0	0	0	21.8922	0	0	0	0	0	0
IMPDH2	Inosine-5'-monophosphate dehydrogenase 2	0	8.71226	6.32142	0	7.81608	9.20613	1.70092	5.33686	4.99869	4.78936	0	2.93482	10.336	4.89584	7.87819	12.8066	5.03533
INF2	Inverted formin-2;Isoform of Q27J81, Isoform 2 of Inverted formin-2	0	0	0	0	0	0	0	0	0	0	0	0	0	8.41836	0	0	1.11488
ING1	Inhibitor of growth protein 1	0	0.588479	0.588479	0.588479	1.90673	0	0	0	1.02437	0	0	0	0	0	0	0	0
INPP1	Inositol polyphosphate 1-phosphatase	0	0	0	0	75.2989	0	0	0	0	0	0	0	0	0	0	0	75.3231
INPP4A	Inositol polyphosphate-4-phosphatase type I A;Isoform of Q96PE3, Isoform 2 of Inositol polyphosphate-4-phosphatase type I A;Isoform of Q96PE3, Isoform 3 of Inositol polyphosphate-4-	0	0	0	0	0	1.08837	0	0	0	0	0	0	0	0	0	0	0
INPP4B	Inositol polyphosphate 4-phosphatase type II	0	0	0	0	0	0	0	18.331	0	0	0	0	0	0	0	5.63034	5.63155
INPP5A	Inositol polyphosphate-5-phosphatase A	0	1.19517	0	0	0	0	0	0	0	0	0	0	0.620232	0	0	0	1.10136
INPPL1	Phosphatidylinositol 3,4,5-trisphosphate 5-phosphatase 2	0	10.3212	10.3212	9.3619	5.32095	5.36509	0	63.9125	0	0	109.217	5.04292	0	69.9725	0	8.23825	6.75349
IPO11	Importin-11;Isoform of Q9UI26, Isoform 2 of Importin-11	0	0	7.17158	0	0	0	0	0	0	0	0	0	0	0	0	0	0
IPO13	Importin-13	0	34.2083	0	0	0	0	0	0	0	0	0	0	7.69227	0	0	0	0
IPO4	Importin-4;Isoform of Q8TEX9, Isoform 2 of Importin-4	0	1.37731	0	220.782	0.467185	0	0	0	0	0	0	0	1.36099	0	0	0.264932	0
IPO5	Importin-5;Isoform of O00410, Isoform 3 of Importin-5	49.7881	30.0352	22.0249	26.4037	14.9861	9.25715	9.67352	18.0296	5.93275	8.44845	17.2938	10.9366	18.9302	22.9682	7.18334	13.5031	13.41
IPO7	Importin-7	12.4172	25.7117	18.5317	21.1234	19.6331	9.9375	81.3738	6.83732	4.12246	6.91635	44.0849	7.22241	8.96096	104.406	4.98571	6.86807	8.16072
IPO9	Importin-9	0	24.0287	0	0	0	0	0	0	0	0	0	0	0	0	0	0	0
IQGAP1	Ras GTPase-activating-like protein IQGAP1	23.5573	9.99151	14.956	77.7793	13.0014	6.91317	0	49.1118	7.87873	31.4396	33.5885	12.6935	17.74	36.8746	7.53749	23.3902	15.8026
IQGAP2	Ras GTPase-activating-like protein IQGAP2	0	0	0	0	0	0	0	0	0	0	0	0	0	0	0	7.22661	3.92851
IQSEC1	Isoform of Q6DN90, Isoform 3 of IQ motif and SEC7 domain-containing protein 1	4.92749	0	0	0	0	0	0	0	0	0	0	0	0	0	0	0	0
IRF2BP1	Interferon regulatory factor 2-binding protein 1	0	0	0	0	0	0	0	0	0	6.51594	0	0	0	0	3.26157	4.86782	0
IRGQ	Immunity-related GTPase family Q protein	0	0	0	50.4852	0	0	0	0	0	0	0	0	0	0	31.6102	0	0
IRS1	Insulin receptor substrate 1	4.27194	3.21759	2.96152	0	0	1.13652	0	0	0	0	4.36908	1.64923	0	0	0	0	1.01351
ISCU	Iron-sulfur cluster assembly enzyme ISCU, mitochondrial	0	0	0	0	0	0	0	0	8.25955	0	0	0	0	0	0	0	0
ISOC2	Isochorismatase domain-containing protein 2	30.8479	28.7032	22.1725	0	15.4771	15.8408	0	0	3.57895	27.1317	0	14.6853	17.3322	0	18.8941	21.609	19.113
IST1	Isoform of P53990, Isoform 2 of IST1 homolog	0	15.0984	0	19.5148	2.94028	4.88627	8.47978	22.9766	7.31739	8.13349	15.1388	0	5.9423	9.83167	5.66665	6.6029	8.8885
ISYNA1	Inositol-3-phosphate synthase 1	0	0	0	0	0	0	0	0	18.619	0	0	0	10.1054	0	0	0	0
ITCH	E3 ubiquitin-protein ligase Itchy homolog;Isoform of Q96J02, Isoform 2 of E3 ubiquitin-protein ligase Itchy homolog	0	0	0	0	0	0	0	0	0	3.10225	0	2.2181	0	0	1.4029	1.55573	1.93076
ITGA1	Integrin alpha-1	0	18.3329	0	0	0	0	0	3.7522	0	0	0	28.0596	0	0	0	14.4689	0
ITGA2B	Integrin alpha-IIb;Isoform of P08514, Isoform 2 of Integrin alpha-IIb	0	0	0	0	0	0	0	0	0	0	0	0	0	51.1478	0	0	0
ITGA5	Integrin alpha-5	0	0	0	0	8.68138	0	0	0	0	0	0	0	0	0	0	12.6834	10.5373
ITGA7	Isoform of Q13683, Isoform Alpha-7X1B of Integrin alpha-7	11.7226	7.78988	11.9788	25.5425	6.16721	2.84693	5.28792	10.2656	4.24675	5.55619	9.09264	6.19986	7.06732	5.07957	1.9047	14.133	5.20749
ITGA7	Isoform of Q13683, Isoform Alpha-7X2B of Integrin alpha-7	0	0	0	0	0	0	0	0	1.94875	0	0	0	0	0	0	1.11029	0.775762
ITGAM	Integrin alpha-M;Isoform of P11215, Isoform 2 of Integrin alpha-M	11.5166	0	0	0	0	0	6.24431	0	0	0	0	0	0	14.9254	0	0	0
ITGAV	Integrin alpha-V;Isoform of P06756, Isoform 3 of Integrin alpha-V	4.73833	0	3.43016	5.008	0	0	0	0	0	0	0	0	0	0	0	0	0
ITGB1	Integrin beta-1	23.0688	20.8993	29.1954	33.4244	15.8303	7.91548	13.3133	23.9324	3.64885	15.5839	12.7523	13.2856	15.7527	13.9742	4.9026	40.1916	11.1411
ITGB1	Isoform of P05556, Isoform 5 of Integrin beta-1	0	0	0	19.0443	0	0	0	0	0	0	0	0	0	0	0	5.31049	0
ITGB1BP2	Integrin beta-1-binding protein 2	8.94799	9.95018	0	101.103	6.60829	7.22732	0	0	0	0	0	0	7.35622	10.1936	10.9025	71.0289	0
ITGB2	Integrin beta-2	0	0	3.46749	0	0	0	0	0	0	0	0	0	0	9.86568	0	0	0
ITGB3	Integrin beta-3	0	0	0	1.62317	2.19023	0	0	0	0	0	0	0	0	30.035	2.60631	0	0
ITGB6	Integrin beta-6	0	21.3713	21.3713	21.3713	0	0	0	0	0	29.2467	11.2587	0	0	0	15.3083	22.0717	11.3273
ITIH1	Inter-alpha-trypsin inhibitor heavy chain H1	0	0	0	0	0	0	42.3726	0	0	0	22.2582	5.3074	0	3.56473	0	0	0
ITIH2	Inter-alpha-trypsin inhibitor heavy chain H2	0	1.3581	0	0	0	0	4.20712	0	1.46237	1.82632	24.6939	2.4293	1.02319	0	0.629545	3.96675	1.94907
ITIH3	Inter-alpha-trypsin inhibitor heavy chain H3;Isoform of Q06033, Isoform 2 of Inter-alpha-trypsin inhibitor heavy chain H3	55.6193	44.2926	0	47.1481	23.4417	0	43.0115	107.247	0	56.283	49.4983	0	16.4231	68.6953	22.0306	27.4369	31.4144
ITIH4	Inter-alpha-trypsin inhibitor heavy chain H4	78.1673	26.4747	0	55.6627	32.1876	20.2945	47.6634	34.2835	0	65.9595	52.0703	44.3692	60.7931	0	13.2016	32.9333	27.6903
ITIH5	Inter-alpha-trypsin inhibitor heavy chain H5	0	13.843	20.1194	28.9577	19.7101	11.3495	9.5694	16.7914	19.492	19.1019	60.0468	16.5075	11.5812	17.7594	23.737	44.5487	18.7037
ITPKC	Inositol-trisphosphate 3-kinase C	0	0	0	0	0	0	0	0	0	0	0	3.3704	0	0	0	0	0
ITSN1	Intersectin-1;Isoform of Q15811, Isoform 8 of Intersectin-1;Isoform of Q15811, Isoform 9 of Intersectin-1	0	0	0	8.62113	0	0	0	39.9563	0	0	0	0	0	16.264	0	0	0
IVD	Isovaleryl-CoA dehydrogenase, mitochondrial	0	3.40511	7.38609	51.685	8.8326	0.85031	22.871	0	2.62335	5.778	0	0	7.44997	0	3.45403	6.91727	0
JAG2	Protein jagged-2;Isoform of Q9Y219, Isoform Short of Protein jagged-2	0	0	0	0	1.17676	0	0	0	0	0	0	0	0	0	0	0	0
JAGN1	Protein jagunal homolog 1	48.1532	17.8908	33.099	99.372	5.89643	6.10629	36.6256	58.128	8.67873	34.1489	57.6355	24.2483	14.017	88.8643	9.33097	24.5547	13.4409
JAK1	Tyrosine-protein kinase JAK1	0	0	20.0592	0	0	3.37814	0	0	0	0	0	0	0	0	0	0	0
JCHAIN	Immunoglobulin J chain	0	0	0	0	0.882447	0	0	0	0	0	0	0	0	0	0	1.72399	0
JMJD7	Bifunctional peptidase and (3S)-lysyl hydroxylase JMJD7	0	10.1937	4.98786	6.0251	3.87337	0	0	0	1.91848	1.34084	0	1.2	2.4141	0	1.49943	0	0
JPH1	Junctophilin-1	444.146	363.438	520.972	362.797	393.449	342.356	348.726	401.315	371.327	382.188	260.91	345.209	291.578	400.892	411.364	1540.76	388.444
JPH2	Junctophilin-2	236.987	108.326	224.809	283.181	170.172	119.365	187.191	251.007	120.353	169.581	291.266	130.642	103.432	180.23	97.2359	198.992	100.816
JPT1	Jupiter microtubule associated homolog 1	23.617	13.2657	13.2657	26.8327	0	0	0	0	0	36.7178	0	0	0	0	0	76.6011	0
JSRP1	Junctional sarcoplasmic reticulum protein 1	573.093	919.033	616.9	329.203	1185.74	807.751	320.985	469.122	698.966	802.559	198.376	385.196	788.051	582.408	648.973	1490.85	473.618
JUP	Junction plakoglobin	0	0.863438	0	0	3.1145	0	0	0	0	0	0	2.01596	1.43072	0	0	4.72754	0
KALRN	Kalirin	0	0	0	0	0	0	0	0	0	35.1461	0	0	0	0	20.6789	27.7099	32.0426
KANK1	KN motif and ankyrin repeat domain-containing protein 1	401.444	0	147.848	196.591	21.3594	23.4033	222.938	242.039	27.9098	103.795	346.091	112.456	14.0396	230.53	0	0	0
KANK2	KN motif and ankyrin repeat domain-containing protein 2;Isoform of Q63ZY3, Isoform 3 of KN motif and ankyrin repeat domain-containing protein 2	0	1.76942	4.71427	0	2.82091	2.80723	3.65329	0	0	4.42871	0	4.01312	5.8325	0	0.856893	10.8152	7.24984
KANK3	Isoform of Q6NY19, Isoform 1 of KN motif and ankyrin repeat domain-containing protein 3	0	0	0	0	0	0	0	0	0	0	0	0	0	0	0	25.2775	0
KARS1	Lysine--tRNA ligase	26.0391	30.9907	20.6593	24.2194	20.0765	22.5101	15.2786	31.2886	15.4013	34.3382	16.1581	23.157	24.3812	9.85887	20.2501	36.0027	23.8522
KBTBD11	Kelch repeat and BTB domain-containing protein 11	0	0	0	0	0	0	0	0	0	0	0	0	0	0	0	0	0.651071
KBTBD12	Kelch repeat and BTB domain-containing protein 12	12.2977	4.92075	11.7927	6.95928	4.97954	5.62441	4.62258	18.1964	5.90957	11.6433	29.5318	10.148	3.8252	15.3861	6.15215	8.34901	5.70858
KBTBD13	Kelch repeat and BTB domain-containing protein 13	14.3062	0	0	0	5.4738	0	0	0	0	0	0	0	0	0	0	0	0
KBTBD2	Kelch repeat and BTB domain-containing protein 2	4.22013	0	0	0	0	0	0	0	0	0	0	2.54028	1.97904	0	0	0	0
KCMF1	E3 ubiquitin-protein ligase KCMF1	3.34754	0	0	0	1.41023	0	0	7.1119	2.30333	5.56003	2.50202	3.04847	1.45531	3.29706	1.91305	3.96858	0
KCNA7	Potassium voltage-gated channel subfamily A member 7	0	0	7.16662	9.59101	0	0	5.89908	16.0209	0	4.03903	10.0645	4.58967	0	10.9832	0	0	0
KCNJ11	ATP-sensitive inward rectifier potassium channel 11	15.4891	4.0995	8.26066	28.4554	4.83937	1.95919	17.2379	23.4739	2.19157	19.7914	27.308	10.7493	7.27034	18.2906	7.80058	8.71836	8.28187
KCNMA1	Isoform of Q12791, Isoform 4 of Calcium-activated potassium channel subunit alpha-1;Isoform of Q12791, Isoform 7 of Calcium-activated potassium channel subunit alpha-1	21.0003	0	0	0	0	0	0	0	0	0	0	0	0	0	0	0	0
KCTD12	BTB/POZ domain-containing protein KCTD12	0	2.11754	2.11754	2.11754	0	0	0	0	0	0	0	0	1.16642	0	0	2.05511	5.87934
KDELR1	ER lumen protein-retaining receptor 1	0	0	0	0	0	0	25.5437	0	0	15.9653	0	0	0	25.1031	0	0	0
KDM1A	Lysine-specific histone demethylase 1A	0	0	0	0	0	0	0	0	0	6.74803	0	0	0	0	0	0	2.06742
KDM5A	Lysine-specific demethylase 5A;Isoform of P29375, Isoform 2 of Lysine-specific demethylase 5A	0	0	0	0	0	2.33925	0	0	1.98544	0	0	0	3.82168	0	2.18387	13.8209	0
KHDRBS1	KH domain-containing, RNA-binding, signal transduction-associated protein 1;Isoform of Q07666, Isoform 2 of KH domain-containing, RNA-binding, signal transduction-associated protein 1	127.094	99.4789	110.743	59.85	36.8035	82.0687	74.0772	89.5129	22.4314	63.442	53.7514	104.131	28.2654	59.4466	45.7116	46.6912	93.1597
KHDRBS3	KH domain-containing, RNA-binding, signal transduction-associated protein 3;Isoform of O75525, Isoform 2 of KH domain-containing, RNA-binding, signal transduction-associated protein 3	12.3431	6.28392	7.90523	7.90523	4.59609	5.91122	7.58027	0	0.811626	2.68892	0	8.9183	2.06754	0	2.67132	1.95	5.55684
KHSRP	Far upstream element-binding protein 2	0	0	0	0	0	0	0	0	0	0	0	0	0	0	0	4.43746	0
KIAA1217	Sickle tail protein homolog	0	0	0	0	0	0	2.58514	0	0	0	41.7725	0	0	0	0	0	0
KIAA1328	Isoform of Q86T90, Isoform 3 of Protein hinderin	0	0	0	0	3.26279	0	0	0	0	15.4304	0	0	0	17.6168	0	0	0
KIAA1671	Uncharacterized protein KIAA1671	0	0	0	0	0	0	0	0	0	0	0	0	0	0	0	5.18364	0
KIF13A	Isoform of Q9H1H9, Kinesin-like protein KIF13A	0	0	0	0	0	0	0	0	0	0	5.82358	0	0	0	0	0	0
KIF1B	Isoform of O60333, Isoform 3 of Kinesin-like protein KIF1B	5.12773	4.48571	3.6586	0	1.8522	4.30603	9.67352	11.3943	4.5046	4.83033	12.2037	8.07201	2.02281	0	3.75342	6.79884	5.7707
KIF1B	Kinesin-like protein KIF1B;Isoform of O60333, Isoform 2 of Kinesin-like protein KIF1B;Isoform of O60333, Isoform 4 of Kinesin-like protein KIF1B	0	0	10.6344	7.6889	0	0	0	0	0	0	8.71345	0	0	0	0	0	0
KIF1C	Kinesin-like protein KIF1C	0	2.99661	2.23365	0	0	1.47937	0	0	0	1.55947	0	1.86759	1.4681	0	0.706198	0	0
KIF21A	Kinesin-like protein KIF21A;Isoform of Q7Z4S6, Isoform 3 of Kinesin-like protein KIF21A;Isoform of Q7Z4S6, Isoform 4 of Kinesin-like protein KIF21A	0	6.05663	0	0	0	0	0	0	0	0	0	0	1.90877	0	2.0717	3.33453	0
KIF5B	Kinesin-1 heavy chain	72.1482	46.9279	44.2298	47.9363	96.4026	48.4259	17.0759	37.9565	24.8861	24.8472	20.7343	18.5047	75.6754	23.8412	22.3937	82.0984	13.4626
KIFBP	KIF-binding protein	0	1.95808	0	0	1.06657	0	0	0	0	0	0	0	1.92068	0	0	0	0
KLC1	Isoform of Q07866, Isoform N of Kinesin light chain 1	8.38543	6.72405	11.7927	15.044	15.5628	11.4995	9.80132	0	2.6143	10.9264	0	7.05313	12.1802	8.74434	2.99314	13.603	3.91317
KLC2	Kinesin light chain 2	0	13.0416	35.3439	0	19.0147	8.99658	0	0	6.02083	15.4517	0	0	14.4529	0	5.34228	18.5924	4.26607
KLC4	Kinesin light chain 4;Isoform of Q9NSK0, Isoform 3 of Kinesin light chain 4	0	3.29709	0	0	8.23358	3.56515	0	0	1.1969	0	0	0	8.55765	0	2.33683	4.51892	1.20984
KLHDC3	Kelch domain-containing protein 3	0	0	0	0	2.24744	1.80874	0	0	1.01101	1.92432	0	0	3.16413	0	1.65282	3.1134	0
KLHDC4	Kelch domain-containing protein 4	8.62433	7.29341	5.29803	0	8.59783	8.04225	0	11.3028	6.94634	14.1866	0	8.82027	9.1507	0	10.3616	24.4813	6.79874
KLHL21	Kelch-like protein 21	22.947	10.5301	26.7371	18.1788	16.3376	11.6032	18.0628	21.1732	20.4435	29.0588	24.6939	19.8464	13.3062	37.9514	19.885	26.2262	28.3876
KLHL22	Kelch-like protein 22	0	0	0	0	0	0	0	0	0	16.1986	0	0	0	0	0	2.11853	0
KLHL30	Kelch-like protein 30	0	3.84177	0	0	2.91064	5.35892	0	0	0	0	0	15.7211	1.41402	0	2.09279	0	2.87957
KLHL31	Kelch-like protein 31	90.9966	68.7751	113.819	60.9066	48.5947	60.2112	75.0386	88.2848	44.9114	105.166	49.8529	101.48	50.2984	122.893	74.9422	86.6233	72.9001
KLHL33	Kelch-like protein 33	0	3.08128	3.08128	5.39218	0	1.51627	0	0	0	0	0	0	0	0	0	0	2.14846
KLHL33;KLHL33	Isoform of A6NCF5, Kelch-like protein 33;Isoform of A6NCF5, Kelch-like protein 33	39.3211	18.46	31.8504	45.1299	13.1459	11.4519	30.9588	44.5744	10.1919	42.5576	59.7434	25.7443	0	43.6744	11.5778	15.1403	18.3328
KLHL40	Kelch-like protein 40	71.9657	59.749	124.312	84.5209	90.5292	99.1465	94.9696	167.065	91.7606	236.961	241.096	95.4513	79.2783	217.134	61.3941	110.85	103.045
KLHL41	Kelch-like protein 41	142.766	747.362	780.575	674.628	892.049	919.978	485.83	802.206	921.417	800.714	806.659	563.874	853.6	848.257	803.575	1265.13	973.483
KLKB1	Plasma kallikrein	7.28828	0	0	0	3.17314	0	0	0	0	2.72821	0	1.61021	29.9885	0	3.29175	3.58538	0
KMT2A	Histone-lysine N-methyltransferase 2A;Isoform of Q03164, Isoform 2 of Histone-lysine N-methyltransferase 2A;Isoform of Q03164, Isoform 3 of Histone-lysine N-methyltransferase 2A	0	7.81503	26.5653	0	0	2.32155	0	0	4.93238	0	0	0	3.60209	0	2.09617	3.22059	0
KNG1	Isoform of P01042, Isoform LMW of Kininogen-1	49.1955	23.1489	19.9395	53.4028	17.9841	13.7809	24.7619	46.2792	14.2908	21.8714	46.4291	25.9945	11.8047	19.1438	16.7004	20.3627	22.9049
KNG1	Kininogen-1	0	0	0	0	0	0	0	0	2.43028	0	0	0	0	0	9.83618	0	7.01016
KPNA1	Importin subunit alpha-5	74.3405	42.1532	36.0923	21.4025	17.7578	9.53624	10.8065	37.0498	41.9813	0	14.1609	13.9856	35.9215	17.2515	9.08922	21.814	23.6825
KPNA3	Importin subunit alpha-4	25.6995	56.9942	34.4599	110.577	19.0015	31.2448	0	0	19.6678	10.0387	0	13.0612	42.2819	25.1957	23.3898	32.3471	22.3629
KPNA4	Importin subunit alpha-3	47.8768	20.0093	14.3852	20.0093	8.97612	9.18285	0	12.2627	10.7537	3.44887	0	13.6327	14.2677	0	7.61775	11.1156	9.08716
KPNA6	Importin subunit alpha-7	0	5.29579	5.29579	5.29579	0	0	0	0	0	0	0	0	0	0	0	5.10781	0
KPNB1	Importin subunit beta-1	8.71616	32.9481	21.479	34.6469	27.3772	12.7931	16.2549	11.9148	5.45452	9.46187	23.8062	9.40333	28.7114	5.93099	7.41868	22.0971	16.167
KRAS	Isoform of P01116, Isoform 2B of GTPase KRas	0	9.31174	0	0	8.33468	9.05685	0	8.33462	3.85617	6.89727	4.13609	9.81255	10.9007	6.849	11.7741	21.342	17.5723
KRI1	Protein KRI1 homolog	0	4.63587	4.63587	4.63587	3.12888	2.81953	0	0	2.19764	5.26474	0	4.54969	3.71411	0	2.84726	6.11413	2.89087
KRR1	KRR1 small subunit processome component homolog;Isoform of Q13601, Isoform 2 of KRR1 small subunit processome component homolog	0	0	0	0	0	0	0	0	0	2.15912	0	1.76109	0	0	3.63351	0	3.01806
KRT1	Keratin, type II cytoskeletal 1	47.4488	10.2856	86.0626	27.3693	8.7718	82.8662	581.011	47.5648	0	30.8658	217.415	415.989	6.58346	0	1.98896	7.64777	0
KRT17	Keratin, type I cytoskeletal 17	0	9.6523	0.973676	0.973676	3.85646	0	0	0	0	0	0	4.64924	0	0	0	0	0
KRT18	Keratin, type I cytoskeletal 18	0	0	0	0	297.022	152.608	364.573	284.633	0	111.449	256.797	182.382	0	264.562	0	141.038	0
KRT2	Keratin, type II cytoskeletal 2 epidermal	57.1117	0	87.9457	31.2942	0	14.1116	0	0	16.3665	28.7857	44.6571	69.1324	13.7833	7.17178	0	0	16.5245
KRT5	Keratin, type II cytoskeletal 5	0	0	52.0493	0	0	8.28853	41.0568	0	0	0	111.376	48.7508	0	23.2449	0	0	0
KRT6A	Keratin, type II cytoskeletal 6A	0	0	0	0	0	0	6.06296	6.60368	0	0	0	8.09062	0	0	0	0	0
KRT78	Keratin, type II cytoskeletal 78	0	0	0	0	0	41.7809	193.012	0	0	0	69.629	224.276	0	0	0	0	0
KRT9	Keratin, type I cytoskeletal 9	73.253	0	21.8784	9.4507	1.23052	7.27574	72.1082	18.3099	0	10.2136	0	24.7561	0	0	0	0	3.41766
KRTCAP2	Keratinocyte-associated protein 2;Isoform of Q8N6L1, Isoform 2 of Keratinocyte-associated protein 2	0	0	0	0	2.77389	0	0	0	2.74572	4.14837	0	1.39246	2.84941	0	1.6494	0	0
KSR1	Isoform of Q8IVT5, Isoform 2 of Kinase suppressor of Ras 1	0	0	0	0	0	0	4.8449	0	0	0	69.5169	0	0	0	0	0	0
KTN1	Kinectin;Isoform of Q86UP2, Isoform 4 of Kinectin	17.0422	14.0098	17.3906	14.095	18.4157	18.2548	16.0504	9.74733	10.3123	17.0325	6.18429	12.7404	13.2909	19.7527	9.93635	87.6667	8.51193
KYAT1	Kynurenine--oxoglutarate transaminase 1	0	0	0	0	0	0	0	0	0	0	0	0	0	26.5172	0	0	0
KYAT3	Kynurenine--oxoglutarate transaminase 3;Isoform of Q6YP21, Isoform 3 of Kynurenine--oxoglutarate transaminase 3	0	6.90448	0	10.9993	2.62174	0	0	0	3.67668	0	0	0	3.16122	0	3.54672	7.57242	0
L2HGDH	L-2-hydroxyglutarate dehydrogenase, mitochondrial	18.9071	26.0454	25.5455	29.5097	6.63573	5.39358	11.334	11.5368	2.54189	14.1866	16.9821	12.9176	13.5505	11.0542	4.69707	10.424	12.0179
L3HYPDH	Trans-3-hydroxy-L-proline dehydratase	0	0	0	0	0	0	0	0	0	57.1712	0	0	0	0	0	0	0
LACTB	Serine beta-lactamase-like protein LACTB, mitochondrial	38.3023	68.1131	58.778	30.3504	20.8396	26.5202	29.6746	40.4097	21.0793	41.1507	25.6856	28.4303	17.9413	29.5547	44.8463	136.91	108.775
LAGE3	EKC/KEOPS complex subunit LAGE3	0	0.907885	0.907885	0.907885	0	0	0	0	0	0	0	0	0	0	0	0	0
LAMA2	Laminin subunit alpha-2	439.972	66.2111	344.917	390.989	26.4843	32.1201	393.899	450.283	32.7685	198.645	598.674	361.645	17.5855	273.041	12.3261	54.0424	11.8885
LAMA3	Laminin subunit alpha-3	2.99658	0	0	2.70436	0	0	0	2.63564	0	3.89563	0	1.58592	0	3.95665	0	0	0
LAMA4	Laminin subunit alpha-4;Isoform of Q16363, Isoform 2 of Laminin subunit alpha-4	48.8793	10.1984	24.8493	28.3703	5.44238	7.73887	26.3563	30.499	5.18151	16.0427	42.3243	28.1502	6.53062	27.5821	3.12627	10.4456	7.11751
LAMA5	Laminin subunit alpha-5	11.774	1.96305	5.91854	16.3066	1.32461	1.67678	16.7334	27.4464	0	9.10075	50.291	5.15682	3.92152	10.7134	0	4.13366	0
LAMB1	Laminin subunit beta-1	148.979	21.19	73.9971	88.321	11.6195	12.1109	76.5569	92.0843	8.617	44.1446	123.734	85.3065	8.80146	72.5149	4.90147	15.1473	6.79091
LAMB2	Laminin subunit beta-2	565.36	187.772	835.824	1038.16	59.6333	94.5534	1029.4	1112.98	77.1536	550.906	1829.74	823.535	53.4262	672.709	25.0511	145.357	36.2767
LAMC1	Laminin subunit gamma-1	973.925	113.326	430.739	496.666	47.9059	60.9084	490.1	530.989	50.589	261.263	654.32	416.276	41.9136	328.797	21.2778	96.9694	25.9495
LAMP1	Lysosome-associated membrane glycoprotein 1	0	0	0	0	0	20.8823	0	0	0	0	0	0	0	0	0	0	0
LAMP2	Isoform of P13473, Isoform LAMP-2B of Lysosome-associated membrane glycoprotein 2	0	0	0	15.3449	0	0	0	0	0	0	0	0	0	0	0	21.3223	1.53366
LAMTOR1	Ragulator complex protein LAMTOR1	12.3659	4.72858	1.81474	2.17853	1.80713	1.12248	0	0	0.826906	0	0	0	3.01408	0	0	3.55414	2.53821
LAMTOR2	Ragulator complex protein LAMTOR2	0	4.52305	0	0	0	0	0	0	2.67028	0	0	0	0	0	2.38301	0	5.87663
LAMTOR3	Ragulator complex protein LAMTOR3	0	6.96997	0	0	0	0	0	0	0	0	0	0	0	0	0	0	0
LAMTOR4	Ragulator complex protein LAMTOR4	0	0	0	0	0	0	0	0	0	6.13447	0	0	0	0	0	0	0
LANCL1	Glutathione S-transferase LANCL1	96.8334	103.117	76.9865	84.3654	56.91	49.8514	75.004	127.434	54.9612	82.9998	92.3826	87.0326	78.7689	75.1151	64.4061	72.5329	85.8674
LANCL2	LanC-like protein 2	0	2.71413	2.96425	0	15.0935	7.97953	0	0	12.2506	10.2206	0	18.3224	14.4762	3.00419	8.8987	17.4838	2.49131
LAP3	Cytosol aminopeptidase;Isoform of P28838, Isoform 2 of Cytosol aminopeptidase	0	13.2994	0	4.9678	3.38523	0	0	0	0	0	0	0	9.45049	93.5895	12.4602	49.709	0
LARP1	La-related protein 1	25.7351	27.8568	0	39.1619	5.59357	11.9944	26.5329	30.136	6.35121	7.33799	52.383	13.9053	8.613	23.3845	16.7659	41.052	16.0557
LARP7	La-related protein 7;Isoform of Q4G0J3, Isoform 3 of La-related protein 7	0	23.1223	68.2362	412.633	26.7294	23.2315	0	136.957	10.8457	0	0	0	36.6568	111.052	11.2831	59.3383	25.0108
LARS1	Leucine--tRNA ligase, cytoplasmic	74.3234	46.2733	75.0092	59.5202	41.3037	38.6614	34.6964	41.8394	22.4366	41.0939	25.3215	55.1673	45.0355	51.5261	36.3435	63.1589	42.0657
LARS2	Leucine--tRNA ligase, mitochondrial	0	16.0595	9.23878	0	10.7842	6.92751	0	0	10.4101	0	0	7.29427	10.4269	0	10.3378	8.00451	5.09599
LASP1	LIM and SH3 domain protein 1;Isoform of Q14847, Isoform 2 of LIM and SH3 domain protein 1	27.8628	13.9936	16.1516	124.585	4.90105	5.47618	44.3185	0	4.21557	10.1948	0	11.7783	11.4566	36.2266	7.28327	31.9253	20.7648
LBP	Lipopolysaccharide-binding protein	0	0	0	0	5.97432	0	0	0	0	0	0	0	12.0463	0	6.5302	2.6202	4.21142
LBR	Delta(14)-sterol reductase LBR	0	4.68631	4.68631	16.0422	5.5054	6.51895	0	10.3416	5.56873	0	9.14514	7.10038	4.28208	0	5.04576	7.66717	0
LCLAT1	Lysocardiolipin acyltransferase 1;Isoform of Q6UWP7, Isoform 3 of Lysocardiolipin acyltransferase 1	6.13515	4.20369	0	8.40938	0	0	0	0	0	0	0	0	0	0	0	0	0
LCMT1	Leucine carboxyl methyltransferase 1;Isoform of Q9UIC8, Isoform 2 of Leucine carboxyl methyltransferase 1	0	4.01634	0	0	0	0	0	0	0	0	0	0	9.16547	0	0	10.5447	7.92918
LCP1	Plastin-2	0	0	0	0	0	0	0	0	0	0	0	0	0	2.05129	0	0	0
LDAF1	Isoform of Q96B96, Isoform 2 of Lipid droplet assembly factor 1	3.55325	0	0	0	0	0	4.20228	0	0	9.58688	0	4.12175	0	0	0	0	1.57445
LDB3	Isoform of O75112, Isoform 2 of LIM domain-binding protein 3	842.996	324.288	672.38	1221.98	207.486	242.202	1184.91	969.138	211.133	642.95	2125.64	522.374	237.769	817.01	177.675	529.34	292.367
LDB3	Isoform of O75112, Isoform 6 of LIM domain-binding protein 3	99.0662	15.1786	43.8445	112.684	11.5661	13.6137	94.3158	96.1359	12.2703	31.5702	273.395	34.0708	11.9331	38.497	10.0723	12.0958	27.1662
LDHA	L-lactate dehydrogenase A chain;Isoform of P00338, Isoform 3 of L-lactate dehydrogenase A chain	1210.39	2044.71	605.919	2204.77	603.655	380.783	409.623	1401.8	209.728	252.8	694.689	534.788	856.159	1309.87	182.569	489.367	808.776
LDHAL6A	L-lactate dehydrogenase A-like 6A	0	200.277	200.277	200.277	63.4291	0	0	39.727	0	34.5523	0	0	64.3805	0	0	26.0876	0
LDHAL6B	L-lactate dehydrogenase A-like 6B	5.56833	212.144	34.5155	24.8007	72.9775	48.5263	0	56.9883	19.9139	10.8737	0	40.8208	67.2442	42.4353	27.6202	22.7319	92.0721
LDHB	L-lactate dehydrogenase B chain	171.682	346.921	177.629	129.498	54.7506	60.6146	35.8992	63.839	25.3196	206.86	100.021	142.129	80.3812	46.9599	52.994	143.792	89.3981
LDHD	Probable D-lactate dehydrogenase, mitochondrial;Isoform of Q86WU2, Isoform 2 of Probable D-lactate dehydrogenase, mitochondrial	24.7985	13.223	5.20133	15.5727	4.47393	3.78946	0	19.8786	2.418	11.0835	0	9.08201	3.87842	6.10137	5.1443	8.74248	3.98225
LEMD2	LEM domain-containing protein 2	30.8195	6.85064	25.3346	24.1693	8.04431	13.9308	25.4791	47.107	13.3431	37.3833	27.6242	20.5912	15.7672	26.9232	9.89297	14.1558	14.3823
LETM1	Mitochondrial proton/calcium exchanger protein	15.2309	15.8172	17.1757	20.0893	16.3339	10.3676	10.7197	8.61759	5.08225	15.881	14.381	6.51301	12.3667	6.86953	6.41692	49.0608	9.53736
LETMD1	LETM1 domain-containing protein 1;Isoform of Q6P1Q0, Isoform 7 of LETM1 domain-containing protein 1	0	0	0.970543	0	0	0	0	0	0	0.666158	0	0	0.388199	0	0	1.3603	0
LGALS1	Galectin-1	73.2193	101.796	98.1103	140.593	52.3466	153.63	114.31	253.271	57.8038	43.9519	105.049	173.733	96.0626	93.8269	48.6213	115.036	37.2587
LGALS3	Galectin-3	0	0	0	0	0	0	0	0	0	0	0	0	0	0	0	11.1798	0
LGALS3BP	Galectin-3-binding protein	0	8.82939	14.9388	0	10.1016	3.38281	0	23.6802	13.4727	0	0	13.0281	5.71287	0	7.77368	13.5905	17.5399
LGMN	Legumain;Isoform of Q99538, Isoform 2 of Legumain	0	0	0	0	0	0	0	0	0	0	0	0	0	0	0	1.45424	1.37476
LIG3	DNA ligase 3;Isoform of P49916, Isoform 2 of DNA ligase 3;Isoform of P49916, Isoform 3 of DNA ligase 3;Isoform of P49916, Isoform 4 of DNA ligase 3	1.76695	2.34764	2.34764	2.34764	1.64547	1.5692	1.66757	0	1.16106	2.31301	0	0	1.18292	0	2.00922	1.87169	4.34739
LIMA1	LIM domain and actin-binding protein 1	0	0	22.8042	0	0	0	0	0	0	0	0	49.8634	0	0	0	0	0
LIMCH1	Isoform of Q9UPQ0, Isoform 2 of LIM and calponin homology domains-containing protein 1	22.0712	3.57628	3.57628	3.57628	5.59228	2.20484	4.04655	0	2.70992	0	0	0	4.13099	4.37348	0	16.2718	17.994
LIMCH1	Isoform of Q9UPQ0, Isoform 3 of LIM and calponin homology domains-containing protein 1	34.2946	9.3655	9.27075	10.8934	14.2459	11.1116	16.3714	20.1691	12.464	9.72696	25.211	12.6497	8.66671	16.0519	10.3879	21.1999	14.9633
LIMD1	LIM domain-containing protein 1	0	0	0	0	0	0	0	0	0	4.25478	14.3513	3.41729	0	0	0	3.95125	4.88684
LIMK1	LIM domain kinase 1;Isoform of P53667, Isoform 2 of LIM domain kinase 1;Isoform of P53667, Isoform 4 of LIM domain kinase 1	0	0	0	0	3.42759	0	0	0	0	5.2273	0	0	0	0	0	0	0
LIMS1	Isoform of P48059, Isoform 3 of LIM and senescent cell antigen-like-containing domain protein 1	19.2232	29.4938	41.4968	26.0594	16.1692	9.14908	13.384	16.5877	13.4572	19.146	13.2828	18.3562	13.6099	18.8985	14.0711	18.6438	26.4015
LIMS2	LIM and senescent cell antigen-like-containing domain protein 2	0	0	0	0	0	0	0	0	0	0	0	0	0	0	26.3589	17.8252	0
LIN7C	Protein lin-7 homolog C	2.989	2.47247	0	1.25882	0	2.10852	1.2583	0	0	0	0	0	0	0	2.00968	0	0
LIPE	Hormone-sensitive lipase	0	0	0	0	0	0	0	0	0	0	0	0	15.9131	0	0	0	14.3624
LIPT2	Putative lipoyltransferase 2, mitochondrial	0	0	0	0	0	0	0	0	0	0	0	0	3.39043	0	0	0	0
[truncated: 2,423 more rows]
