# Supplementary material for: A novel deep proteomic approach in human skeletal muscle unveils distinct molecular signatures affected by aging and resistance training
Source: Aging (Albany NY). 2024 Apr 19;16(8):6631–51. doi: 10.18632/aging.205751 (PMC11087122; doi:10.18632/aging.205751)
Supplement: Supplementary Table 2 [file aging-16-205751-s002.xlsx]

## Sheet: Sheet1
Supplementary Table 2. Raw non-MyoF data from Y and MA participants.
Gene	Protein name	Young15	Young24	Young47	Young64	Young67	PRE_MA03	PRE_MA05	PRE_MA17	PRE_MA30	PRE_MA32	PRE_MA19	POST_MA03	POST_MA05	POST_MA17	POST_MA30	POST_MA32	POST_MA19
A1BG	Alpha-1B-glycoprotein	3.05915	5.0151	8.70348	3.60252	2.40662	2.0051	3.72745	1.91982	4.8792	10.73	1.98021	6.22011	4.19878	7.19914	65.2861	2.44667	16.0372
A2M	Alpha-2-macroglobulin	15.2933	31.9727	106.437	88.4721	15.585	3.26991	31.1682	6.46488	27.6343	39.5368	9.96121	42.8251	24.639	76.0292	377.851	15.7353	104.383
A5YM72	Isoform of A5YM72, Isoform 3 of Carnosine synthase 1;Isoform of A5YM72, Isoform 5 of Carnosine synthase 1	22.2178	18.2507	32.1287	17.9807	19.8065	17.6985	17.9066	15.7384	17.2285	15.9699	18.7548	53.4439	23.2393	34.0942	34.5399	19.8233	66.3023
AAAS	Aladin	2.06396	1.72695	1.78646	2.32331	1.41647	2.38581	1.34745	3.10071	2.32032	1.61548	3.15582	3.71619	1.6731	3.24101	1.36465	1.94525	3.29101
AACS	Acetoacetyl-CoA synthetase	3.61244	4.27051	9.04884	6.70975	5.73729	5.71131	10.1161	4.75402	4.37571	8.91254	6.68362	13.5674	11.1538	8.84668	7.51486	5.0533	13.7192
AAGAB	Alpha- and gamma-adaptin-binding protein p34	0.729795	0.369896	0.856432	0.822444	0.707631	1.02645	0.971655	0.366658	0	0.665888	1.00534	0.585461	1.09024	0.888751	0	0	1.66314
AAK1	Isoform of Q2M2I8, AP2-associated protein kinase 1	0	0	0	0	0	0	3.99496	1.42417	0.530944	0	0	2.85298	2.20711	3.40393	0	1.67215	2.99936
AAK1	AP2-associated protein kinase 1;Isoform of Q2M2I8, Isoform 2 of AP2-associated protein kinase 1	2.59957	2.71069	2.73964	2.37469	1.782	2.15941	3.66954	2.52965	2.187	2.07397	3.31674	4.12665	3.52146	3.57257	5.25437	3.3595	5.0226
AAMDC	Mth938 domain-containing protein	667.884	577.27	877.593	807.619	653.442	612.542	571.495	566.058	415.096	848.011	458.154	680.923	345.48	820.314	558.497	437.9	729.674
AAMP	Angio-associated migratory cell protein	11.143	9.03815	8.87346	11.0156	8.76207	9.56171	9.91316	13.8951	12.6023	10.5124	15.1779	13.329	10.2689	15.5733	7.49068	10.401	15.4678
AAR2	Protein AAR2 homolog	2.37029	2.50657	3.55298	3.12612	3.35125	2.37923	2.34375	2.64339	2.60105	2.75678	3.46108	3.95001	2.50567	4.2003	1.65814	2.45683	3.64946
AARS1	Alanine--tRNA ligase, cytoplasmic	101.251	90.8614	120.308	149.833	108.744	63.8022	146.188	34.4557	82.556	124.998	29.1616	216.869	152.8	198.967	96.7433	41.3404	238.962
AARS2	Alanine--tRNA ligase, mitochondrial	2.3518	2.3452	3.0206	4.63027	3.04514	3.44696	4.34622	4.62446	3.63286	3.79578	4.28166	6.09955	4.36137	7.12657	1.88374	3.44727	5.63026
AARSD1	Alanyl-tRNA editing protein Aarsd1	0.084159	0	0.294912	0.451239	0	0	0.166576	0.251455	1.33675	0.908242	0.484967	0	0.212336	0.275284	0.716343	1.11269	0.844362
AARSD1	Isoform of Q9BTE6, Isoform 3 of Alanyl-tRNA editing protein Aarsd1	27.8869	24.7673	28.973	32.8856	27.6317	28.0566	27.5621	13.9817	30.5175	33.098	37.6714	47.5771	32.309	20.1085	21.7932	30.9439	53.5339
AASDHPPT	L-aminoadipate-semialdehyde dehydrogenase-phosphopantetheinyl transferase	15.9184	11.3548	13.4336	15.7945	10.1533	11.4798	13.2743	7.46381	21.8901	31.7469	11.511	17.563	7.12727	10.2089	27.8433	14.6681	21.9295
AASS	Alpha-aminoadipic semialdehyde synthase, mitochondrial	4.29241	4.3489	7.07446	8.5115	7.1057	8.94202	15.5458	4.7969	4.06302	7.59104	7.34534	13.7625	10.1818	10.7642	5.38792	5.55489	13.2657
ABCA5	Cholesterol transporter ABCA5	6.88495	6.19269	7.58042	6.12218	6.46706	8.7244	9.34356	12.69	6.30302	3.87527	10.6736	12.2433	6.93463	15.7863	1.73309	4.52976	11.7443
ABCA6	ATP-binding cassette sub-family A member 6	0.975665	0	1.00437	0.586012	0.590754	0.465839	1.30771	0.886463	0.351114	0.428846	1.3308	1.74501	1.90381	0.787191	0.877043	0.837674	1.82864
ABCA8	ABC-type organic anion transporter ABCA8	22.7877	14.4471	29.2478	23.0466	25.9064	16.9682	9.7009	13.6226	19.8129	24.7458	20.6686	48.3947	20.9954	31.7234	23.438	22.4686	38.6126
ABCA9	ATP-binding cassette sub-family A member 9	1.13658	1.74856	1.86334	0	1.23853	0.730358	0	0.639971	1.22334	1.19042	0.998417	3.63411	1.69677	1.52328	1.91744	2.03739	1.99953
ABCB10	ATP-binding cassette sub-family B member 10, mitochondrial	2.29668	1.40533	3.30593	3.41041	1.27499	1.92325	4.26886	1.88782	2.06751	3.80103	2.61163	3.56367	3.39018	4.38915	0	2.40478	4.78331
ABCB6	ATP-binding cassette sub-family B member 6;Isoform of Q9NP58, Isoform 2 of ATP-binding cassette sub-family B member 6	2.20953	4.05023	1.83018	3.90397	4.16588	2.77994	3.30912	2.08238	2.65735	1.68734	4.08895	6.53278	2.49186	4.64067	2.52418	2.63982	4.20948
ABCB7	Iron-sulfur clusters transporter ABCB7, mitochondrial;Isoform of O75027, Isoform 2 of Iron-sulfur clusters transporter ABCB7, mitochondrial	3.67452	2.83191	6.60683	8.56458	3.64256	5.89706	15.7258	4.41429	3.28661	5.72666	4.61543	17.049	8.40665	14.3542	5.74938	5.47489	12.1487
ABCB8	Mitochondrial potassium channel ATP-binding subunit;Isoform of Q9NUT2, Isoform 2 of Mitochondrial potassium channel ATP-binding subunit;Isoform of Q9NUT2, Isoform 4 of Mitochondrial potassium channel ATP-binding subunit;Isoform of Q9NUT2, Isoform 5 of Mitochondrial potassium channel ATP-binding subunit	2.91945	1.92965	3.93453	2.9404	2.40994	3.8729	6.06195	3.05253	2.5891	3.15938	4.33223	5.61175	4.44655	4.71824	1.12855	2.53323	7.33717
ABCC1	Multidrug resistance-associated protein 1;Isoform of P33527, Isoform 9 of Multidrug resistance-associated protein 1	6.17164	5.12719	5.96476	6.69123	6.17031	5.75355	6.52097	8.0772	5.4796	4.45042	10.549	11.4974	6.13795	12.3561	4.22981	5.0162	11.982
ABCC4	ATP-binding cassette sub-family C member 4	1.52722	1.59875	2.25213	2.48145	1.91826	2.51557	2.7209	1.69965	1.8499	1.72425	3.68733	4.02808	4.95249	2.86009	0.877043	2.69821	4.46302
ABCC9	ATP-binding cassette sub-family C member 9	4.62488	3.03235	6.83901	7.96721	2.40108	4.95491	0	5.99047	0	19.3866	9.26855	14.6892	4.34834	12.641	12.9605	6.27589	17.7267
ABCD3	ATP-binding cassette sub-family D member 3	1.21172	1.08113	0	0	1.2045	2.23942	1.70103	2.17952	3.78137	3.27342	1.76243	3.56285	1.89506	3.18479	0	2.95989	3.78991
ABCD4	Lysosomal cobalamin transporter ABCD4	0	0	0	0	0.321075	0.817214	0	0	0	1.17815	0	1.10128	0.885367	0	0	0.627155	1.3754
ABCE1	ATP-binding cassette sub-family E member 1	8.02603	4.81814	11.2123	8.63389	6.27201	6.01916	7.53203	6.17107	7.717	7.2795	6.14203	11.6546	7.08962	9.32782	10.7454	5.26593	14.462
ABCF1	ATP-binding cassette sub-family F member 1	15.9588	12.7286	13.6645	15.6245	12.6301	17.2996	18.6514	24.6355	17.185	9.29611	25.681	25.7216	18.5022	26.2773	9.8974	17.7123	26.2984
ABCF2	ATP-binding cassette sub-family F member 2;Isoform of Q9UG63, Isoform 2 of ATP-binding cassette sub-family F member 2	2.76122	3.19286	3.3105	2.2465	1.97336	2.16389	2.88278	2.69315	2.71987	1.42037	3.21227	4.46784	2.28783	1.39117	1.80144	1.8079	5.66538
ABCF3	ATP-binding cassette sub-family F member 3	14.1384	11.9366	15.5344	19.427	13.8486	14.1558	17.4668	19.6318	13.7705	15.4526	18.8413	20.04	16.5968	24.0758	9.59447	12.4187	23.3791
ABHD10	Palmitoyl-protein thioesterase ABHD10, mitochondrial	3.12105	3.09799	4.94531	5.16662	3.0939	2.96508	4.08801	2.50242	2.40187	5.06409	2.74924	5.33824	2.87159	5.2757	3.78025	2.51116	6.34934
ABHD11	Protein ABHD11	4.14573	6.90048	6.40462	6.61464	5.50056	3.44934	5.55408	2.37498	1.64229	2.90671	2.42724	4.36916	2.63101	4.21483	19.7206	2.80592	2.62742
ABHD12	Lysophosphatidylserine lipase ABHD12;Isoform of Q8N2K0, Isoform 2 of Lysophosphatidylserine lipase ABHD12;Isoform of Q8N2K0, Isoform 3 of Lysophosphatidylserine lipase ABHD12	0	0.272696	0	0.558607	0.289539	1.09128	0.840451	1.12891	0	0.428254	0.516906	1.81844	1.39741	0.971808	0	0.78827	1.64486
ABHD13	Protein ABHD13	18.0178	10.8188	13.3319	12.975	14.3783	38.72	18.9414	38.4823	19.8449	17.8567	40.3099	19.2619	40.1258	17.6393	3.79333	19.6687	18.0563
ABHD14B	Putative protein-lysine deacylase ABHD14B	79.3781	63.7499	128.025	98.3799	76.2442	51.09	92.281	51.1635	75.4134	102.589	64.5226	114.894	100.467	108.039	166.848	69.02	122.554
ABHD16A	Phosphatidylserine lipase ABHD16A	3.07115	3.99834	5.96339	4.81622	2.7372	4.46618	8.02994	4.69635	3.49179	5.06992	3.9638	10.5268	5.9803	13.0221	3.1537	3.31723	8.68618
ABHD2	Monoacylglycerol lipase ABHD2	1.38868	1.639	2.38228	2.11449	1.68348	0	2.19337	1.7233	0	0	1.61962	3.71876	2.65781	2.79049	0	0	2.65478
ABHD5	1-acylglycerol-3-phosphate O-acyltransferase ABHD5	4.93743	6.3384	4.52786	5.39146	4.22675	1.07556	7.33352	2.64582	4.22521	15.0731	6.91531	4.22667	4.72306	6.78391	5.16798	5.05446	11.2029
ABI1	Abl interactor 1;Isoform of Q8IZP0, Isoform 10 of Abl interactor 1;Isoform of Q8IZP0, Isoform 2 of Abl interactor 1;Isoform of Q8IZP0, Isoform 3 of Abl interactor 1;Isoform of Q8IZP0, Isoform 4 of Abl interactor 1;Isoform of Q8IZP0, Isoform 5 of Abl interactor 1;Isoform of Q8IZP0, Isoform 6 of Abl interactor 1;Isoform of Q8IZP0, Isoform 7 of Abl interactor 1;Isoform of Q8IZP0, Isoform 8 of Abl in…	4.27662	4.66852	4.54876	3.73944	3.73772	3.00563	3.42698	3.63966	2.80252	1.04016	5.11814	6.24594	5.0527	6.22129	0	3.7877	7.91277
ABI3	ABI gene family member 3;Isoform of Q9P2A4, Isoform 2 of ABI gene family member 3	1.03944	1.38989	1.32463	1.38678	1.53464	0.848859	1.17439	0.826153	0.481891	1.62144	1.16469	2.02861	1.427	2.02712	0	0.768909	1.53225
ABI3BP	Target of Nesh-SH3	7.72504	7.42813	9.74301	9.43857	6.96798	7.49266	5.8886	5.17679	7.61463	9.7432	6.32866	14.8319	10.5323	9.02985	10.925	5.97826	14.6295
ABL1	Tyrosine-protein kinase ABL1;Isoform of P00519, Isoform IB of Tyrosine-protein kinase ABL1	0.542626	0.570137	0.277072	0.486526	0.818478	0.54807	0.953262	1.00568	0.210401	0	0.820185	0.637967	0.931586	1.19119	0	0.245344	1.12313
ABLIM1	Isoform of O14639, Isoform 2 of Actin-binding LIM protein 1;Isoform of O14639, Isoform 6 of Actin-binding LIM protein 1	0.556289	0.490885	1.09369	0.603262	0.270712	0.603581	0.899937	0.397521	0.506931	0.629218	0.476773	1.39476	0.789811	1.07716	0.307554	0.68026	0.915859
ABLIM2	Isoform of Q6H8Q1, Actin-binding LIM protein 2;Isoform of Q6H8Q1, Actin-binding LIM protein 2	0	0.632236	0	0	0	0	0	0	0	0	0	0	0	0	0	0	0
ABLIM2	Isoform of Q6H8Q1, Isoform 9 of Actin-binding LIM protein 2	1.07548	1.16032	1.19893	0.887169	0.942339	0.981151	0	0.856566	0.679436	1.28056	0.748362	2.26047	0.874024	1.2528	0.536563	0.190053	2.16985
ABLIM3	Actin-binding LIM protein 3	0	0.495655	0	0	0.407105	0	0	0	0	0	6.45078	0	0	0	0	0	0
ABR	Active breakpoint cluster region-related protein;Isoform of Q12979, Isoform Short of Active breakpoint cluster region-related protein;Isoform of Q12979, Isoform 4 of Active breakpoint cluster region-related protein	1.63644	2.2135	2.53801	2.95942	1.796	1.87299	3.05782	3.13156	3.06866	4.62063	2.48721	3.88417	2.21883	4.40636	2.25331	2.80205	3.8764
ABRAXAS2	BRISC complex subunit Abraxas 2	14.4744	14.7938	13.7846	18.3995	12.4913	14.7583	20.0222	19.9692	19.9044	17.9061	22.6314	23.0196	17.751	27.9692	6.58599	18.5001	28.1014
ABTB2	Ankyrin repeat and BTB/POZ domain-containing protein 2	3.36357	2.15864	2.7189	3.44276	1.71517	2.8375	3.41596	3.7667	2.82325	2.58882	4.20448	3.31511	3.494	3.98915	0	2.39263	4.5439
ACAA1	3-ketoacyl-CoA thiolase, peroxisomal	2.19989	1.05872	1.60064	1.6252	2.2116	3.85067	4.08707	4.24092	3.02934	3.74543	4.90695	0	1.99859	3.6206	2.49242	5.42095	5.59795
ACAA2	3-ketoacyl-CoA thiolase, mitochondrial	131.492	146.009	233.611	258.765	215.48	103.833	352.624	203.967	116.345	260.436	197.702	134.616	149.494	204.965	81.1187	181.165	158.755
ACACA	Isoform of Q13085, Isoform 2 of Acetyl-CoA carboxylase 1	2.18475	3.07241	2.30777	2.60739	0.879037	0.796408	3.09893	1.78838	1.27511	1.83866	2.41553	2.65826	3.59355	2.59825	1.29098	1.88919	4.45994
ACACB	Acetyl-CoA carboxylase 2	11.2409	10.2584	13.6865	14.7811	9.10137	9.98932	13.4033	11.271	12.1969	11.5745	14.1355	20.6015	14.5554	17.9383	8.46488	11.0707	34.279
ACAD10	Acyl-CoA dehydrogenase family member 10;Isoform of Q6JQN1, Isoform 5 of Acyl-CoA dehydrogenase family member 10	1.32893	1.41052	1.30946	1.37755	1.121	1.48059	3.33052	1.80452	1.20906	2.35451	2.09755	2.63753	2.87556	2.99282	0.666072	1.86241	2.96571
ACAD8	Isobutyryl-CoA dehydrogenase, mitochondrial	32.802	27.9563	35.8091	52.4936	40.5982	42.2509	74.8018	45.5471	24.3808	56.325	45.1764	56.2987	44.9493	52.6357	16.0332	36.6754	53.1776
ACAD9	Complex I assembly factor ACAD9, mitochondrial	8.42754	6.55963	10.0206	12.1341	8.06133	13.2873	23.389	7.86069	5.71148	8.30618	15.2304	20.687	17.403	10.1761	5.31522	9.2422	22.4145
ACADM	Isoform of P11310, Medium-chain-specific acyl-CoA dehydrogenase, mitochondrial	9.87645	6.66468	5.9442	10.4594	11.1791	17.6293	19.5484	15.8584	0.889505	0.663898	21.395	23.8615	15.8607	26.4777	0	1.68064	36.2851
ACADM	Medium-chain specific acyl-CoA dehydrogenase, mitochondrial;Isoform of P11310, Isoform 2 of Medium-chain specific acyl-CoA dehydrogenase, mitochondrial	1107.9	763.448	1172.99	1503.16	1235.68	1113.36	1904.64	1344.19	982.084	1465.89	2091.76	1814.67	1383.96	2194.22	573.352	1632.96	2848.58
ACADS	Short-chain specific acyl-CoA dehydrogenase, mitochondrial	113.58	185.216	113.971	213.013	165.923	124.061	436.026	104.848	41.2809	217.421	158.786	169.785	251.434	196.508	24.6957	155.875	271.912
ACADSB	Short/branched chain specific acyl-CoA dehydrogenase, mitochondrial	44.7611	28.8855	53.6158	84.7435	45.4576	85.2385	197.657	69.3203	32.904	99.1977	79.9488	105.487	113.012	86.6923	16.7502	81.447	71.7346
ACADVL	Very long-chain specific acyl-CoA dehydrogenase, mitochondrial;Isoform of P49748, Isoform 3 of Very long-chain specific acyl-CoA dehydrogenase, mitochondrial	514.4	413.218	448.635	442.289	591.707	511.842	856.076	486.587	164.949	426.679	515.48	601.586	654.219	592.08	126.771	329.212	660.281
ACAP2	Arf-GAP with coiled-coil, ANK repeat and PH domain-containing protein 2	2.91206	2.98249	5.21186	4.09361	2.3217	2.56115	3.05782	2.95162	3.25648	3.9765	3.57036	7.619	5.29082	5.83016	4.18043	2.83319	6.38453
ACAT1	Acetyl-CoA acetyltransferase, mitochondrial	719.285	921.891	606.168	1018.61	755.626	1091.78	2279.88	1095.37	891.967	1260.09	1324.38	1145.51	1103.63	1751.38	548.809	1115.51	1502.9
ACAT1	Isoform of P24752, Acetyl-CoA acetyltransferase, mitochondrial	0.370852	0.76998	0.421302	0.822255	0.585878	2.2026	2.21571	1.47387	2.47656	2.29246	1.98569	1.94849	0.964547	1.92256	1.22186	1.67369	2.1386
ACAT2	Acetyl-CoA acetyltransferase, cytosolic	0	0	7.94133	4.78306	2.30785	3.507	0	1.44831	4.49727	6.22589	0	7.584	2.96704	4.58755	9.2113	3.17523	7.44438
ACBD3	Golgi resident protein GCP60	8.22055	8.26379	12.2685	11.741	7.25616	9.33331	10.9575	9.79401	6.23805	9.09288	12.8178	17.8895	14.175	15.3809	7.74143	6.99641	19.3388
ACBD5	Isoform of Q5T8D3, Isoform 2 of Acyl-CoA-binding domain-containing protein 5;Isoform of Q5T8D3, Isoform 3 of Acyl-CoA-binding domain-containing protein 5;Isoform of Q5T8D3, Isoform 4 of Acyl-CoA-binding domain-containing protein 5	0	0.0920406	0	0	0	0.247364	0	0.137804	0.242576	0.230941	0.200961	0.454672	0.296431	0	0.110362	0.205104	0.359525
ACBD6	Acyl-CoA-binding domain-containing protein 6	3.0761	2.56554	2.9147	3.55636	3.19232	2.36176	2.38129	2.89908	2.72677	3.26514	3.57777	3.40485	2.2528	3.72546	1.26044	2.81433	3.95666
ACE	Angiotensin-converting enzyme	25.0554	18.5943	19.9983	28.4647	21.3849	34.4061	19.3558	37.1929	26.1306	23.9884	47.5896	30.8105	27.4741	26.97	6.31424	17.7777	23.7481
ACHE	Acetylcholinesterase	1.52616	1.45204	1.60544	2.37195	1.56858	1.38719	1.3032	2.37827	1.34477	2.83597	1.232	2.63693	1.41099	3.56435	3.26679	1.38031	1.48843
ACIN1	Apoptotic chromatin condensation inducer in the nucleus	0	6.72635	11.0051	6.82034	0	3.48206	2.69657	4.08282	3.26173	0	5.74	5.94974	3.61679	3.03445	1.71601	7.08068	12.9607
ACKR1	Atypical chemokine receptor 1;Isoform of Q16570, Isoform 1 of Atypical chemokine receptor 1	25.3397	21.2412	18.0881	31.6232	31.9747	14.7685	24.497	25.9693	12.9583	15.2301	45.7733	24.0159	39.0322	60.406	12.1989	32.2534	22.3012
ACLY	ATP-citrate synthase	3.21367	4.71715	7.05007	5.1016	4.73486	0.601777	2.53462	2.1511	4.17012	3.47697	3.97843	3.30977	2.23936	3.27552	20.9759	3.11225	6.69312
ACO1	Cytoplasmic aconitate hydratase	42.4425	44.1041	61.7296	58.6417	60.0215	21.94	38.1955	22.1442	28.7573	68.9448	43.4722	30.3597	16.2564	19.3946	35.8691	31.0438	38.2586
ACO2	Isoform of Q99798, Aconitate hydratase, mitochondrial	0	0.62644	0.783237	1.82602	1.29124	1.63281	1.23798	0.632063	0.537463	1.73701	0.981549	2.04032	0.864815	0	1.47204	0	2.84072
ACO2	Aconitate hydratase, mitochondrial	1306.17	1447.04	1878.42	2089.33	2045.54	1600.43	1734.25	1112.66	1097.36	2630.88	1171.96	2325.4	1344.07	1765.14	2455.96	761.334	3091.21
ACOT1	Acyl-coenzyme A thioesterase 1	163.305	248.645	131.702	185.441	280.677	42.3971	104.043	70.7882	39.6049	107.474	146.593	54.5253	52.823	58.5437	19.3073	54.1471	157.409
ACOT11	Isoform of Q8WXI4, Isoform 2 of Acyl-coenzyme A thioesterase 11	2.51305	3.26648	3.03454	4.01704	2.611	4.12321	18.9938	9.61525	2.52783	5.75574	10.2474	6.58564	4.92746	16.0687	3.92393	4.55696	8.8599
ACOT13	Acyl-coenzyme A thioesterase 13;Isoform of Q9NPJ3, Isoform 2 of Acyl-coenzyme A thioesterase 13	20.5921	16.2734	34.5059	36.5684	27.8296	17.8828	46.9043	22.7018	18.8169	37.128	28.7947	31.4122	24.3458	33.6496	19.3251	27.7763	29.7323
ACOT2	Acyl-coenzyme A thioesterase 2, mitochondrial	262.967	350.574	331.507	381.862	427.274	139.552	219.944	113.962	130.632	334.812	228.356	161.807	150.461	113.915	151.538	134.516	380.127
ACOT7	Isoform of O00154, Isoform 4 of Cytosolic acyl coenzyme A thioester hydrolase	8.36567	7.59415	9.16628	3.46822	0	4.52518	7.4957	3.88741	8.36659	5.67285	4.99588	5.95385	4.08717	6.56569	17.0263	4.74652	10.1515
ACOT8	Acyl-coenzyme A thioesterase 8	0.737906	0.620411	0.420914	1.34836	0.869975	1.91794	2.25119	2.22516	0.787678	0.556803	2.7322	2.13549	0.961442	1.76555	0	1.26554	2.14649
ACOT9	Acyl-coenzyme A thioesterase 9, mitochondrial	44.1571	51.9373	55.9491	61.9878	48.5185	75.2377	131.043	109.688	48.7808	53.6416	92.196	107.869	84.9421	166.909	32.2122	77.3705	93.0098
ACOX2	Peroxisomal acyl-coenzyme A oxidase 2	0	0	0	0	0	0	0.804474	0	0	0.615321	1.96387	0	0	0	0	0	0
ACP1	Isoform of P24666, Isoform 2 of Low molecular weight phosphotyrosine protein phosphatase	0	0	4.15043	1.64781	0.970302	1.4623	0	0	6.3292	5.58858	0	1.13083	0	0	4.61446	3.9389	0
ACP1	Low molecular weight phosphotyrosine protein phosphatase	26.7486	24.9792	54.9659	27.1773	22.0652	24.2458	37.6975	30.3292	45.6298	48.1284	29.33	24.2213	18.4554	39.1724	32.5253	32.3054	34.1687
ACP6	Lysophosphatidic acid phosphatase type 6	0.506525	0.317161	0.719438	0.567291	0.28695	0	0	0	0	1.18005	0	0.392191	0.53669	0.608107	0	0	1.00376
ACSF2	Medium-chain acyl-CoA ligase ACSF2, mitochondrial;Isoform of Q96CM8, Isoform 2 of Medium-chain acyl-CoA ligase ACSF2, mitochondrial;Isoform of Q96CM8, Isoform 3 of Medium-chain acyl-CoA ligase ACSF2, mitochondrial	3.70852	11.1553	4.52265	4.18703	5.27967	29.8151	10.3684	10.0893	5.38578	8.87363	4.48551	35.8177	18.8505	24.4388	13.6496	3.98635	46.0923
ACSF3	Malonate--CoA ligase ACSF3, mitochondrial	0	2.06386	2.96478	0	2.26416	5.29341	2.42612	3.37179	0	2.0128	0.787793	7.07454	9.28374	6.22846	1.97661	2.44273	8.34312
ACSL1	Long-chain-fatty-acid--CoA ligase 1	754.92	675.895	641.347	1348.67	1070.3	773.1	2597.24	2476.06	548.212	1562.79	2541.63	884.093	1327.16	2070.05	536.687	1909.74	1138.23
ACSL3	Fatty acid CoA ligase Acsl3	43.0527	30.597	31.9296	53.8402	36.0087	54.5426	51.5124	84.4035	51.351	40.2904	73.2507	70.8595	55.0077	79.1554	39.2122	68.3243	66.8542
ACSL4	Long-chain-fatty-acid--CoA ligase 4;Isoform of O60488, Isoform Short of Long-chain-fatty-acid--CoA ligase 4	6.30378	5.83417	6.87691	9.70301	5.88311	8.73445	7.93802	11.3517	8.70861	7.99653	10.8596	15.4738	11.4584	12.0055	7.84189	8.30185	18.0438
ACSL6	Isoform of Q9UKU0, Isoform 5 of Long-chain-fatty-acid--CoA ligase 6	6.01175	5.7132	6.64956	9.29836	7.33343	6.59836	11.3976	9.42021	6.64735	10.0601	8.34472	7.44729	6.445	9.96278	5.40283	9.85769	11.2961
ACSL6	Long-chain-fatty-acid--CoA ligase 6;Isoform of Q9UKU0, Isoform 1 of Long-chain-fatty-acid--CoA ligase 6;Isoform of Q9UKU0, Isoform 6 of Long-chain-fatty-acid--CoA ligase 6;Isoform of Q9UKU0, Isoform 9 of Long-chain-fatty-acid--CoA ligase 6	3.54814	3.24623	3.355	5.35188	3.83625	4.43952	6.60256	5.58291	4.23788	5.06876	6.12508	5.265	4.02739	6.41476	3.2346	6.31357	8.21162
ACSM3	Acyl-coenzyme A synthetase ACSM3, mitochondrial	2.93901	1.70915	0	3.98388	0	3.54843	4.31829	2.75779	2.55064	0	0	4.36112	3.28945	4.2843	0	0	0
ACSM5	Acyl-coenzyme A synthetase ACSM5, mitochondrial	1.21955	0.824858	1.8059	1.99437	1.09246	7.03616	3.05079	3.60131	1.43697	2.39222	2.76893	8.13763	2.25436	4.38814	7.90353	1.61538	6.0371
ACSS1	Acetyl-coenzyme A synthetase 2-like, mitochondrial;Isoform of Q9NUB1, Isoform 2 of Acetyl-coenzyme A synthetase 2-like, mitochondrial	2.09749	3.16286	2.82288	5.00848	3.66781	3.2654	7.74662	7.32252	4.96305	7.77144	5.8886	4.56876	3.60017	6.76675	4.45883	3.6006	4.45788
ACSS2	Isoform of Q9NR19, Isoform 2 of Acetyl-coenzyme A synthetase, cytoplasmic	13.2404	13.8733	13.0045	21.0575	15.9995	12.4118	12.8977	18.5422	11.5279	12.6009	20.2168	17.326	17.3549	19.0362	22.585	8.34402	18.7124
ACSS3	Acyl-CoA synthetase short-chain family member 3, mitochondrial	7.60678	5.47998	12.6705	10.0255	9.06373	11.9107	15.7657	11.5441	12.0684	12.031	9.97268	17.434	16.5053	16.5531	10.2901	10.7146	12.7888
ACTA1	Actin, alpha skeletal muscle	2323.81	2214.52	3022.69	2746.67	1964.75	13840	2951.29	5205.48	7674.47	5568.03	4211.26	9627.16	4883.41	5340.48	5830.7	3916.29	10983.2
ACTA1	Isoform of P68133, Actin, alpha skeletal muscle	0.994949	1.14889	1.5707	2.05687	1.17871	3.81361	1.50007	2.13826	4.10817	2.78164	2.34213	2.17469	0.847468	2.52511	2.84067	2.43095	3.47159
ACTBL2	Beta-actin-like protein 2	9.92432	8.71323	12.3992	11.8469	8.46656	32.6464	14.2565	21.7801	26.549	20.7492	25.4046	42.2764	19.0864	32.6348	24.9472	14.5404	48.6327
ACTG1	Actin, cytoplasmic 2	229.193	214.625	310.523	273.405	191.517	244.588	255.454	170.083	320.958	466.017	202.587	540.13	356.306	369.216	643.015	351.702	763.535
ACTG2	Actin, gamma-enteric smooth muscle	24.1435	11.5632	17.8852	27.5554	16.7035	66.5481	22.8146	27.4701	37.4411	34.61	34.4042	62.517	28.3285	26.9575	28.9882	47.1819	46.5939
ACTL6A	Actin-like protein 6A	1.1197	1.2047	2.7114	0	1.06735	2.14011	1.25462	0	0	2.14339	4.36226	2.26255	0	3.31269	2.06073	0	3.00074
ACTN1	Alpha-actinin-1	1.12876	0.926146	1.59145	1.21397	0.805206	0	0	0.957328	0	0	1.73865	2.96209	2.28941	3.50332	0	0	2.92502
ACTN1	Isoform of P12814, Isoform 3 of Alpha-actinin-1	9.3778	9.47064	16.1545	10.0001	8.42184	6.41853	13.7566	9.11298	9.99191	12.3481	12.32	22.5891	14.7783	19.4751	7.75034	14.4071	23.4708
ACTN2	Alpha-actinin-2	25.2058	27.6426	31.3396	29.2554	22.3927	56.7461	41.7265	57.8443	50.4369	50.5477	37.1631	53.3578	23.9675	58.5033	13.0744	38.6879	53.2266
ACTN3	Alpha-actinin-3	3.01371	0	0	1.55062	2.5829	7.73456	0	2.25923	7.19695	4.84062	2.46667	7.19115	1.57334	2.49621	14.0482	4.24693	5.61602
ACTN4	Alpha-actinin-4	45.7932	48.5154	73.4841	60.0629	42.1509	29.1096	57.2548	36.7334	48.1669	73.3671	38.9056	82.205	61.1819	58.8275	37.8025	48.8062	98.1813
ACTR10	Actin-related protein 10	7.15815	6.63864	8.06108	8.67573	6.24176	8.12523	9.18358	7.65351	9.59066	11.7193	8.61811	12.9658	9.44764	10.2821	7.00359	8.96345	15.4963
ACTR1A	Alpha-centractin	53.5428	48.4707	54.0124	56.6639	47.3704	66.8861	77.1635	69.9134	76.6388	63.1977	71.5339	108.442	83.661	94.9687	33.3443	81.2784	120.207
ACTR1B	Beta-centractin	7.28619	7.05796	8.92469	7.71447	7.34526	10.9884	13.459	12.6113	13.4725	11.7274	10.8971	17.6278	14.9804	15.459	6.99071	12.986	18.0729
ACTR2	Actin-related protein 2	17.4382	14.1932	21.842	18.9673	12.6534	12.0847	12.0036	15.5977	21.323	21.2227	17.2589	26.94	19.0337	17.8929	23.3572	13.2244	34.5326
ACTR3	Actin-related protein 3	11.9372	11.1193	16.188	12.0616	10.6539	9.82507	7.94716	10.0986	16.0011	17.8362	10.0441	17.9514	12.5986	10.4347	18.8027	7.52619	22.1528
ACVR1	Activin receptor type-1	1.54597	7.29591	7.48847	7.35879	4.80958	0.720669	2.29516	1.26666	2.05376	3.39861	2.64735	2.14832	0.953505	4.77288	16.5318	6.3588	3.68493
ACVR2A	Activin receptor type-2A;Isoform of P27037, Isoform 2 of Activin receptor type-2A	1.24854	0.754014	0	0	0	1.28008	2.17076	1.25447	0.960171	0	1.73825	1.98929	1.82778	2.01874	1.08174	1.10046	2.25387
ACVRL1	Serine/threonine-protein kinase receptor R3	0.279577	0.315994	0.71861	0	0	0	0.648055	0	0.470813	1.00046	0.42424	0.661299	0.787269	0.746931	0	0	0.71208
ACY1	Aminoacylase-1	3.19522	2.65448	4.53517	4.53113	4.05982	0	3.24423	1.5895	2.02511	4.92041	2.38238	3.07042	2.26581	4.18485	20.3761	9.32986	6.15076
ACYP1	Acylphosphatase-1	3.94186	1.44271	7.35518	2.40218	4.33119	2.91297	2.55219	1.71815	6.11292	7.79653	3.78889	6.48333	4.44553	3.56189	9.36528	4.76075	7.60377
ACYP2	Acylphosphatase-2	515.586	385.371	739.934	674.227	506.882	255.821	296.082	327.01	272.803	509.685	315.146	502.34	382.933	550.91	482.971	326.795	393.033
ADA	Adenosine deaminase	5.92926	4.29219	6.97257	3.37215	3.43643	11.2859	4.86533	7.45522	2.33426	3.96919	15.7403	22.8086	14.6192	6.29188	1.3481	4.88175	12.0956
ADAL	Adenosine deaminase-like protein;Isoform of Q6DHV7, Isoform 2 of Adenosine deaminase-like protein	0	0	0	0.391027	0	0	0	0	0	1.05658	0	0	0	0	4.02737	0	0
ADAM10	Disintegrin and metalloproteinase domain-containing protein 10	4.25991	3.55614	5.03841	3.86551	4.06169	3.70029	4.61012	4.11586	4.59355	5.55011	5.11225	7.33834	5.27744	6.56569	5.22421	5.53446	10.1328
ADAM15	Disintegrin and metalloproteinase domain-containing protein 15;Isoform of Q13444, Isoform 3 of Disintegrin and metalloproteinase domain-containing protein 15	15.3215	9.41411	11.4049	11.9814	14.9557	20.8706	12.7325	22.4316	11.2189	13.8772	18.5529	16.1696	15.1678	17.1151	4.40171	15.4766	9.58139
ADAM17	Disintegrin and metalloproteinase domain-containing protein 17	1.33107	0.868719	2.24695	0.915601	1.16898	1.18042	2.0161	1.10296	0	0	1.46154	2.5775	1.9486	2.06386	0	0	2.38852
ADAM33	Disintegrin and metalloproteinase domain-containing protein 33;Isoform of Q9BZ11, Isoform 2 of Disintegrin and metalloproteinase domain-containing protein 33	0	0.5421	0	0	0	0	0	0.837453	0	0	0.847836	0	0.854325	1.83181	0	0	2.02922
ADAM9	Disintegrin and metalloproteinase domain-containing protein 9	3.72135	1.61987	3.07392	3.09461	2.77017	3.29561	2.71089	2.82723	0	4.90571	3.93924	3.60079	3.70018	1.9737	1.32593	2.54493	1.75077
ADAMTS19	A disintegrin and metalloproteinase with thrombospondin motifs 19	0	0.229921	0.424515	0	0.196746	1.34845	0	0.444284	0	0	0	0.905103	0.524956	0	0	0	0
ADAMTSL2	ADAMTS-like protein 2	1.04352	0.809057	1.61248	0.853505	0.923649	1.03642	1.70495	0.693682	1.03908	1.56892	1.18744	2.40269	1.88332	1.26381	1.01513	0.959788	1.38972
ADAMTSL4	ADAMTS-like protein 4;Isoform of Q6UY14, Isoform 3 of ADAMTS-like protein 4	0.550302	0.818237	1.13971	1.22097	0.745945	0.932257	1.22352	0.871286	0.764273	0	0.918569	1.65614	0.932874	1.85004	2.03667	0.954938	1.47921
ADCK1	AarF domain-containing protein kinase 1;Isoform of Q86TW2, Isoform 2 of AarF domain-containing protein kinase 1	2.24699	2.41257	0	3.26893	1.81847	2.68186	7.00023	4.57047	2.98916	2.08066	3.75502	4.24618	4.09471	5.29396	1.96979	3.91719	0
ADCK5	Uncharacterized aarF domain-containing protein kinase 5	1.58672	1.57391	1.73338	1.98521	1.51254	3.22876	4.52285	3.49269	1.26284	1.7632	3.13121	3.92643	3.45958	4.23624	0.42036	1.45036	3.59276
ADCY2	Adenylate cyclase type 2	2.35018	1.86715	1.86979	2.10478	1.66076	2.71791	2.15235	3.12004	2.00886	1.34339	3.11969	3.73937	1.27945	3.76513	0	1.48346	2.88157
ADCY9	Adenylate cyclase type 9	3.67368	3.33718	3.73502	4.10304	2.93297	3.16035	3.71204	4.62978	2.563	3.1189	4.22875	4.44322	2.94458	5.99488	0.858067	2.86797	5.24842
ADD1	Alpha-adducin;Isoform of P35611, Isoform 2 of Alpha-adducin;Isoform of P35611, Isoform 3 of Alpha-adducin;Isoform of P35611, Isoform 6 of Alpha-adducin	7.7126	7.49859	9.21071	9.57428	7.14343	4.51477	8.63798	6.53974	7.9259	10.0763	8.31404	16.2554	9.30515	13.683	9.82022	11.1989	15.2556
ADD2	Beta-adducin	1.48286	2.13638	2.09842	2.18528	2.71523	3.19401	3.80113	1.65486	2.49487	2.12864	3.83541	4.6655	1.79855	6.38823	3.21752	5.83949	3.93667
ADD3	Isoform of Q9UEY8, Isoform 1 of Gamma-adducin	5.86409	4.65242	7.0875	7.41321	4.64951	3.08628	4.56785	4.43058	5.46448	5.68855	4.99358	10.3992	8.05792	7.80334	6.38883	4.89525	10.4143
ADGRE5	Adhesion G protein-coupled receptor E5;Isoform of P48960, Isoform 2 of Adhesion G protein-coupled receptor E5;Isoform of P48960, Isoform 3 of Adhesion G protein-coupled receptor E5	13.0768	10.0387	9.62483	16.2333	10.109	9.34191	10.5223	10.9411	16.6015	18.0095	14.6964	18.0675	16.4181	16.576	9.23254	13.2793	21.3269
ADGRF5	Adhesion G protein-coupled receptor F5	0	0.0998342	0.248195	0.236977	0	0	0	0.168757	0	0	0.173186	0.662061	0.284855	0.361394	0	0	0.791095
ADGRL2	Isoform of O95490, Isoform 4 of Adhesion G protein-coupled receptor L2	0	0	0	0	0	0.462206	0	0	0.676003	0	0	0	0	0	0	0	0
ADGRL4	Adhesion G protein-coupled receptor L4	11.6896	5.55238	8.33284	7.78944	8.69375	12.851	13.3941	9.66186	6.62748	8.58819	13.801	11.3422	16.0259	12.5107	0	9.90775	10.5519
ADGRV1	Adhesion G-protein coupled receptor V1	1.25806	0	3.45059	0	0	4.02379	0	3.0058	2.19558	0	3.03048	5.68065	3.31989	6.56116	0	0	6.49574
ADH1B	All-trans-retinol dehydrogenase [NAD(+)] ADH1B	116.923	155.733	270.578	229.407	191.296	89.5851	142.992	98.983	130.181	149.831	90.5757	115.425	140.257	96.9573	303.963	111.526	72.8163
ADH1C	Alcohol dehydrogenase 1C	10.2707	8.43683	20.0675	10.2001	11.3503	6.91251	8.61613	6.34981	8.0714	8.0464	9.92001	12.3083	5.6627	6.05871	11.4372	9.19973	10.7678
ADH5	Alcohol dehydrogenase class-3	209.749	214.674	244.846	220.448	193.244	174.155	73.9456	149.266	135.378	67.0195	273.66	308.673	33.8316	97.5619	93.0081	104.346	340.431
ADHFE1	Hydroxyacid-oxoacid transhydrogenase, mitochondrial	5.90338	7.13147	16.5803	17.9765	12.3853	7.60739	22.2952	11.0322	9.49399	12.6503	16.936	11.9371	13.2502	13.4301	7.13544	7.5158	18.9465
ADI1	Acireductone dioxygenase	2.99089	2.99971	7.32138	4.18029	4.12009	3.46925	4.83406	0	2.96858	5.60404	4.07579	6.69727	6.39033	5.53835	3.70613	2.61201	6.47484
ADIPOQ	Adiponectin	10.9774	10.6165	14.4675	10.2756	6.48944	3.98507	5.80112	3.32859	4.69082	8.77812	4.07767	10.7448	4.63472	10.6704	10.5274	2.68148	15.6649
ADISSP	Isoform of Q9GZN8, Isoform 2 of UPF0687 protein C20orf27	30.6338	29.7016	36.9142	43.1426	30.4093	19.8215	31.3698	34.416	17.2325	18.5525	35.7118	40.476	31.7558	60.8107	12.587	26.0061	39.0237
ADK	Adenosine kinase	3.82297	3.51625	5.09557	3.62499	3.55146	4.51997	3.95833	2.49207	2.8265	5.21196	3.4428	9.51477	5.3275	4.40332	5.56315	2.64287	8.9357
ADO	2-aminoethanethiol dioxygenase	5.78763	5.47242	7.01283	9.18346	5.686	4.70366	6.10397	5.91372	6.1101	9.73647	7.7128	6.82493	6.33028	7.83033	7.14202	4.73015	11.4427
ADPGK	ADP-dependent glucokinase;Isoform of Q9BRR6, Isoform 2 of ADP-dependent glucokinase	6.04785	4.41855	3.71187	6.8613	7.6174	12.2359	6.64679	10.8758	5.68786	4.94312	15.6031	11.7706	13.2624	6.34425	2.76644	8.48155	7.6989
ADPRH	ADP-ribosylhydrolase ARH1	2.07301	0	0	0	2.33834	0	0	0	0	2.89069	0	0	0	0	5.04686	1.37143	0
ADPRHL1	Isoform of Q8NDY3, Inactive ADP-ribosyltransferase ARH2;Isoform of Q8NDY3, Inactive ADP-ribosyltransferase ARH2	0.464409	0.593443	0	0	0	0.259918	0.814165	0.907529	0.494366	0	0.690895	0	0.734215	0	0	0	0
ADPRHL1	Inactive ADP-ribosyltransferase ARH2	862.186	553.961	854.069	685.025	258.052	641.262	614.769	354.455	627.406	748.861	690.895	1180.32	761.769	583.284	547.42	620.691	1074.06
ADPRM	Manganese-dependent ADP-ribose/CDP-alcohol diphosphatase	1.01789	0.60267	3.61737	1.36586	0.478858	0.514915	0.736906	0.559965	0.695582	0.732827	0.469583	1.96878	1.03734	1.77779	1.11898	0.369637	2.36608
ADPRS	ADP-ribosylhydrolase ARH3	14.4311	12.8938	14.0829	18.7114	15.1254	12.1349	13.546	12.231	18.7218	25.3981	18.4294	16.4323	11.1692	19.1726	33.7692	13.9372	23.4276
ADRB2	Beta-2 adrenergic receptor	0	0.721073	0.416959	0.604375	0.536793	0.54367	0.672376	0.689066	0.819688	0.973647	0.51548	0.580094	0.584283	0.870122	0	0.559468	0
ADRM1	Proteasomal ubiquitin receptor ADRM1	69.5346	47.2802	61.1495	70.3892	43.1625	48.8468	59.8566	37.9543	65.5917	71.0234	41.8709	87.5585	54.6919	70.4175	67.8299	48.292	105.786
ADSL	Adenylosuccinate lyase	250.611	229.763	208.158	265.098	243.28	51.5746	90.1804	175.09	161.194	177.869	156.391	65.9778	26.7376	79.6307	78.3828	122.455	109.478
ADSS1	Isoform of Q8N142, Isoform 2 of Adenylosuccinate synthetase isozyme 1	0	0	0	0	0	0	0	0	0	0	0	0	0	0	1.41293	0	0
ADSS1	Adenylosuccinate synthetase isozyme 1	208.258	122.371	301.226	336.284	165.618	154.076	138.201	134.543	262.27	386.457	149.559	251.361	109.1	171.546	532.379	121.025	267.565
AEBP1	Adipocyte enhancer-binding protein 1	22.6361	19.1681	27.8993	30.193	19.1076	28.2316	39.638	27.5461	24.8914	0	26.1283	49.9917	40.0242	43.2594	27.0845	26.2045	60.0798
AFDN	Afadin;Isoform of P55196, Isoform 5 of Afadin	2.51826	3.02398	4.45752	3.88424	2.22847	2.84994	3.22413	3.14022	2.1456	2.41158	3.85311	5.59755	2.63223	5.45105	2.43344	1.9901	5.52623
AFG1L	AFG1-like ATPase	6.36797	6.64935	4.58029	9.13285	6.74694	7.715	17.3825	9.44628	4.09024	7.88681	9.66077	11.9014	14.293	22.2116	3.8808	10.764	13.6719
AFG3L2	AFG3-like protein 2	67.7487	34.784	41.5425	59.1298	41.6205	48.4212	80.3734	60.1396	31.3292	54.4254	48.4743	103.968	93.7612	113.287	27.5563	51.9847	93.3746
AFM	Afamin	0	0.468899	0.956518	0	0	0	0.564303	0	0.294069	0.610101	0	0	0	0.581139	4.69809	0	1.17606
AFP	Alpha-fetoprotein	9.3778	0	5.95104	12.2154	4.64416	9.78669	0	6.04868	4.83335	7.6931	0	5.43498	6.15493	0	1.50737	0	13.6436
AGAP3	Arf-GAP with GTPase, ANK repeat and PH domain-containing protein 3;Isoform of Q96P47, Isoform 2 of Arf-GAP with GTPase, ANK repeat and PH domain-containing protein 3;Isoform of Q96P47, Isoform 4 of Arf-GAP with GTPase, ANK repeat and PH domain-containing protein 3	0.21918	0.147598	0.177498	0.164515	0.195392	0.373625	0.497178	0.529737	0.422424	0.345224	0.612226	0.677482	0.509945	0.527692	0.309828	0.588132	0.633474
AGBL1	Cytosolic carboxypeptidase 4	3.64755	3.06252	6.82485	5.32361	3.6476	3.80308	5.28582	3.95695	4.81891	4.14573	3.52218	7.57178	4.0209	5.3025	3.94749	1.36451	8.43779
AGFG1	Arf-GAP domain and FG repeat-containing protein 1;Isoform of P52594, Isoform 2 of Arf-GAP domain and FG repeat-containing protein 1;Isoform of P52594, Isoform 3 of Arf-GAP domain and FG repeat-containing protein 1;Isoform of P52594, Isoform 4 of Arf-GAP domain and FG repeat-containing protein 1	3.06408	2.5164	3.65421	3.55391	2.83796	2.22042	5.72417	2.97687	1.93976	1.99389	3.4254	6.84224	5.69407	6.22846	2.16382	1.83643	6.92355
AGFG2	Arf-GAP domain and FG repeat-containing protein 2	2.43333	2.73199	3.32808	3.44038	2.69406	1.94866	4.42703	3.01759	0.51838	0	3.98852	2.9	2.10486	5.47874	0	5.85026	3.16176
AGK	Acylglycerol kinase, mitochondrial	7.94513	4.09147	8.24125	10.4281	6.5254	10.6325	14.3355	10.931	3.9287	10.5926	7.71635	20.2115	9.83611	21.4872	3.28262	4.30007	16.5436
AGL	Glycogen debranching enzyme	24.6604	26.8336	26.7112	26.4001	17.9683	19.0211	25.1891	18.0784	32.2811	43.162	22.5378	30.0745	13.678	31.1947	150.045	18.9224	58.9561
AGMAT	Agmatinase, mitochondrial	3.74887	3.53492	4.09066	5.66117	4.92501	3.37548	4.10594	3.26258	4.8178	4.75775	5.30288	7.50582	3.80122	6.59448	8.7221	4.41342	8.60456
AGO1	Protein argonaute-1	4.47714	4.13694	0	0	0.943859	0	0	3.42185	0	4.91362	0	0	0	0	10.8348	0	7.47702
AGO2	Protein argonaute-2	3.96188	2.93548	6.58708	6.0354	2.89406	5.20638	5.53748	6.191	9.28001	4.39746	6.1647	8.08906	5.22304	7.79795	6.47025	2.43431	11.2158
AGPAT1	1-acyl-sn-glycerol-3-phosphate acyltransferase alpha	4.00591	3.30506	4.04756	7.08608	5.76908	4.77129	8.0466	6.54577	10.386	12.2265	6.3696	6.47438	8.64218	9.45106	4.84196	11.2895	10.7456
AGPAT2	1-acyl-sn-glycerol-3-phosphate acyltransferase beta	3.24863	3.06252	3.19369	3.50515	2.91076	3.03414	4.916	4.15586	3.45341	5.19998	4.13154	4.51542	3.86299	5.63482	0	2.41254	5.13013
AGPAT3	1-acyl-sn-glycerol-3-phosphate acyltransferase gamma	18.1761	14.8586	10.2564	19.4987	15.904	27.4496	26.8048	26.2156	10.4676	17.0727	18.703	28.6153	24.571	29.6743	6.47323	16.9463	20.6172
AGPAT5	1-acyl-sn-glycerol-3-phosphate acyltransferase epsilon	0.668961	0	0	1.56497	0.599801	0.992055	2.37745	0.535378	0.85241	1.66304	0	3.87078	1.56071	3.86172	1.70734	0	2.62017
AGPS	Alkyldihydroxyacetonephosphate synthase, peroxisomal	2.43669	1.4467	2.70765	3.54573	2.24134	4.87008	4.49689	4.51087	2.62149	3.68045	3.84337	6.47438	3.29931	4.6066	2.51374	2.78596	6.5634
AGRN	Isoform of O00468, Isoform 6 of Agrin;Isoform of O00468, Isoform 7 of Agrin	1.64665	1.14572	1.86893	1.43716	0.89147	1.00632	0	1.20854	1.61826	1.67726	1.9396	2.69586	1.705	2.02852	1.8451	2.09785	3.37776
AGT	Angiotensinogen	15.5203	102.655	49.9221	25.0269	22.9249	3.02577	15.3749	5.81247	13.0963	18.8149	6.17322	13.3936	15.2273	23.4953	46.9376	10.3747	31.0763
AGTPBP1	Cytosolic carboxypeptidase 1;Isoform of Q9UPW5, Isoform 2 of Cytosolic carboxypeptidase 1;Isoform of Q9UPW5, Isoform 3 of Cytosolic carboxypeptidase 1	0	0	0	0	0.330908	0.654539	0.442193	0.91677	0.332314	0	0.78057	0.940152	0.657239	0.881618	0	0.445528	1.14269
AGTRAP	Type-1 angiotensin II receptor-associated protein	13.6805	6.99003	14.1904	14.6658	9.21525	23.3957	17.669	17.4406	18.6144	13.0317	20.6591	21.498	30.6707	18.9487	6.91864	18.025	16.3241
AHCTF1	Protein ELYS;Isoform of Q8WYP5, Isoform 2 of Protein ELYS;Isoform of Q8WYP5, Isoform 3 of Protein ELYS	0	0	0	0	0	0.108053	0	0.224161	0	0	0.109172	0.0963825	0	0	0	0.08171	0.176453
AHCY	Adenosylhomocysteinase	1.90986	1.80376	2.87868	2.48889	2.5996	0	1.96432	0	2.22254	3.52697	2.33836	1.82515	1.3719	2.32745	5.3904	3.29287	3.95393
AHCYL1	S-adenosylhomocysteine hydrolase-like protein 1	10.4761	9.58472	11.6491	12.601	9.09928	7.86386	10.8321	11.6268	9.6527	11.1738	13.4776	16.3719	11.8556	16.5493	12.3004	10.2229	17.6615
AHCYL2	Isoform of Q96HN2, Isoform 2 of Adenosylhomocysteinase 3	40.9639	35.3981	49.7157	41.1629	30.5005	30.2577	38.8519	35.7323	35.8054	37.6272	37.2402	51.015	37.5425	52.8056	41.1548	32.0682	56.4064
AHNAK	Neuroblast differentiation-associated protein AHNAK	227.93	218.564	219.378	220.55	185.015	189.905	239.669	257.135	227.221	164.627	361.087	461.953	329.703	345.208	194.545	274.964	413.36
AHNAK2	Protein AHNAK2;Isoform of Q8IVF2, Isoform 3 of Protein AHNAK2	3.85657	3.41648	6.36492	0	3.06907	4.74937	4.68179	3.93786	6.5486	8.4684	5.75588	16.1324	8.56295	5.8841	5.78923	7.33289	10.5276
AHSA1	Activator of 90 kDa heat shock protein ATPase homolog 1	32.7945	31.0227	43.7414	49.9007	37.7491	20.6793	44.0669	27.1619	32.8888	35.4325	28.5504	53.9757	53.8299	51.2956	38.7366	25.0135	53.6944
AHSG	Alpha-2-HS-glycoprotein	19.8793	19.8463	17.6235	37.5756	23.862	25.6706	24.211	41.4248	43.4259	35.6288	56.7429	34.4348	37.0189	31.9213	43.9462	40.8484	23.0212
AHSP	Alpha-hemoglobin-stabilizing protein	0	0	0	0	0	0	0	0	0	0	0	0	0	1.28582	4.1737	0	1.77963
AIDA	Axin interactor, dorsalization-associated protein	5.53224	4.47898	10.4494	6.95034	4.44843	0.929685	3.82571	1.50162	4.62646	9.6073	1.68078	6.88649	4.80312	5.95361	12.5205	3.66839	11.2494
AIFM1	Apoptosis-inducing factor 1, mitochondrial	108.518	76.1341	87.0749	124.597	95.5888	115.01	190.508	140.689	84.9667	122.716	139.641	174.903	135.589	182.381	69.6981	125.972	185.878
AIFM2	Ferroptosis suppressor protein 1	0.814143	1.52118	1.35673	1.47913	0.778228	0.738985	1.49559	0.814443	0.55303	1.21172	1.56103	2.34854	2.53176	1.12637	0.504105	1.85984	1.65779
AIG1	Androgen-induced gene 1 protein;Isoform of Q9NVV5, Isoform 2 of Androgen-induced gene 1 protein	28.1126	19.8052	23.6588	24.7917	22.0499	47.6909	35.1732	69.9456	12.6052	12.1703	50.8876	45.1438	68.5209	48.237	5.20261	12.9085	30.2502
AIMP1	Aminoacyl tRNA synthase complex-interacting multifunctional protein 1;Isoform of Q12904, Isoform 2 of Aminoacyl tRNA synthase complex-interacting multifunctional protein 1	25.8822	20.796	21.3154	28.9605	18.9674	17.7434	35.7694	21.1378	30.3074	32.7266	22.4343	45.8034	34.9964	46.1084	15.9302	28.4103	58.5502
AIMP2	Aminoacyl tRNA synthase complex-interacting multifunctional protein 2	21.0669	14.2817	16.5689	20.9173	15.0976	14.2277	21.848	14.6508	28.0898	24.8257	15.7838	32.3667	23.1538	30.8092	14.4817	23.2796	40.9382
AIP	AH receptor-interacting protein	3.57932	3.05126	5.04421	4.05141	2.6128	3.38482	3.27199	4.12345	6.1894	6.5645	2.99648	6.81864	5.90912	6.07268	6.59813	4.42767	8.06917
AK1	Adenylate kinase isoenzyme 1	3436.38	2015.95	3793.09	3509.99	2603.8	4458.98	1293.34	2846.17	4299.8	4644.1	2490.07	6477.36	3176.31	3149.06	4565.84	1690.73	9730.36
AK2	Adenylate kinase 2, mitochondrial	2.17621	2.54027	2.01508	3.12037	2.63759	1.98078	3.33359	3.04341	2.71237	4.68168	0.986761	3.70253	2.70161	4.02606	5.12532	2.13391	4.02002
AK3	GTP:AMP phosphotransferase AK3, mitochondrial	191.558	319.433	314.77	258.706	234.859	88.907	166.883	85.0669	87.1462	213.846	150.353	99.4485	92.6879	96.4229	63.4777	140.467	171.092
AK4	Adenylate kinase 4, mitochondrial	2.46548	2.58095	3.98651	4.16396	3.17181	3.21171	5.10519	2.72371	3.11852	6.23593	4.058	7.29118	6.58754	3.48081	2.43961	5.50523	6.05102
AK6	Adenylate kinase isoenzyme 6	8.15644	5.13783	8.50929	9.8131	7.99847	6.49136	9.0952	9.3274	8.7327	11.5027	11.4502	9.14951	7.13055	12.3021	6.77206	10.5287	9.81813
AKAP1	A-kinase anchor protein 1, mitochondrial	33.8923	29.3278	16.6799	40.2816	35.2376	123.207	54.1268	133.986	35.0791	25.7514	115.934	41.7829	38.3198	63.3112	8.22661	49.1672	28.8887
AKAP12	A-kinase anchor protein 12	30.5282	24.3769	41.9946	41.3529	25.1077	27.3612	41.0405	29.6593	39.8702	47.9846	36.5268	78.4148	62.896	46.7283	41.1928	52.8537	63.5373
AKAP13	A-kinase anchor protein 13;Isoform of Q12802, Isoform 2 of A-kinase anchor protein 13;Isoform of Q12802, Isoform 3 of A-kinase anchor protein 13	0.286023	0	0.755254	0.500618	0.602014	0.868832	0.963412	0.67571	0.55125	0	0.832745	1.30948	0.878462	0.999264	0	0.665082	1.81898
AKAP7	A-kinase anchor protein 7 isoform gamma	4.71087	3.29366	0	5.09338	4.0032	2.64872	6.45227	3.98621	1.76705	3.96462	4.16305	4.54463	3.7053	7.09546	1.95849	3.29895	7.5636
AKAP8	A-kinase anchor protein 8	0	0	0	0	0	0	0	0.99738	0	0	0.629089	0	0	0.706286	0	0	0.573098
AKAP8L	A-kinase anchor protein 8-like	1.2659	1.38829	1.60544	1.4863	1.09574	1.7609	2.01703	3.21485	2.03962	1.4266	2.9786	2.41045	1.62826	2.68152	0	1.63221	2.89087
AKAP9	A-kinase anchor protein 9;Isoform of Q99996, Isoform 1 of A-kinase anchor protein 9;Isoform of Q99996, Isoform 5 of A-kinase anchor protein 9	6.1024	4.41651	5.76625	3.40178	0	2.66708	4.41888	6.0766	0	0	4.8285	6.15316	4.23178	8.21638	0	0	6.84902
AKR1A1	Aldo-keto reductase family 1 member A1	6.65428	8.16544	7.38062	8.59026	7.66667	4.13843	4.47932	3.89368	7.2152	7.82891	4.75786	6.01725	2.93781	4.66209	32.5777	3.63141	11.6904
AKR1B1	Aldo-keto reductase family 1 member B1	33.7443	27.5346	36.7023	40.3094	29.4786	11.6933	29.1482	17.075	23.3157	44.9057	14.6222	25.5504	20.5647	29.6743	67.0226	15.4873	39.9143
AKR1C1	Aldo-keto reductase family 1 member C1	3.78792	4.03533	6.03522	3.25691	2.4044	1.71213	2.75557	1.65448	4.02206	7.66658	4.04494	4.39945	3.72926	1.71783	8.21336	2.3998	7.05714
AKR1C2	Aldo-keto reductase family 1 member C2	0	2.4237	3.76958	0	0	1.14931	0	2.31932	3.96049	8.93514	2.1959	2.45922	1.62078	0	9.4302	5.61662	3.6756
AKR1C3	Aldo-keto reductase family 1 member C3	0	7.60815	7.38232	6.81877	5.58865	6.77229	0	0	9.22675	33.1056	8.14727	12.8469	9.22833	0	42.6502	8.86493	26.7441
AKR7A2	Aflatoxin B1 aldehyde reductase member 2	7.55094	8.78981	15.3424	16.5732	7.30141	5.51107	10.6246	4.73653	14.1693	18.9017	8.02624	12.5631	7.83111	11.1578	58.3877	7.18415	23.59
AKT1	RAC-alpha serine/threonine-protein kinase	5.36662	4.9634	8.78806	7.86695	4.95572	4.52935	6.85192	4.99069	4.28893	6.38707	5.7018	10.5365	8.58664	9.17446	7.2681	3.90909	10.7778
AKT1S1	Proline-rich AKT1 substrate 1;Isoform of Q96B36, Isoform 3 of Proline-rich AKT1 substrate 1	13.2434	11.838	12.6968	14.181	12.9243	13.5968	18.2353	14.2778	16.5939	19.3153	20.1239	16.6455	16.137	16.8764	7.00037	17.0285	18.8812
AKT2	RAC-beta serine/threonine-protein kinase	14.8834	15.8993	19.7103	24.7632	17.4585	7.91472	13.3417	10.1359	14.0007	29.3495	10.9626	24.3443	26.8672	24.5177	29.0751	15.3736	42.6804
AKT3	RAC-gamma serine/threonine-protein kinase	1.46927	1.11014	2.24591	1.7211	1.58638	1.59197	2.13261	1.68213	0.679749	1.06341	1.8311	2.26099	2.63647	2.7541	0.778612	0.619548	3.40039
AKTIP	AKT-interacting protein;Isoform of Q9H8T0, Isoform 2 of AKT-interacting protein	2.88669	2.54788	3.10952	3.34816	2.66138	3.1213	3.0529	3.07369	3.0878	3.89943	3.58849	5.01762	2.94322	4.4759	3.7344	2.06859	5.51733
ALAD	Delta-aminolevulinic acid dehydratase	38.5657	48.3147	44.0954	35.6949	31.5724	4.26516	53.1633	4.57257	7.85504	13.4959	5.27609	55.3985	31.0401	61.7135	29.7113	2.9558	78.9821
ALAS1	5-aminolevulinate synthase, non-specific, mitochondrial	0	1.60835	0	0	0	2.72983	4.28758	1.33863	1.66283	0	2.14246	4.6537	2.64377	0	0	0	4.63584
ALB	Albumin	338.923	459.599	1000.44	456.149	380.458	180.151	409.649	213.04	465.96	841.398	208.503	599.098	437.646	676.675	8562.9	288.785	1241.45
ALDH16A1	Aldehyde dehydrogenase family 16 member A1	5.25534	4.97255	8.11135	6.65742	6.39303	2.09428	6.17038	3.28443	4.67788	7.98549	2.77467	8.41198	3.90952	7.22904	9.58784	5.02545	14.9392
ALDH18A1	Delta-1-pyrroline-5-carboxylate synthase;Isoform of P54886, Isoform Short of Delta-1-pyrroline-5-carboxylate synthase	2.31473	3.02886	4.1447	4.31824	2.74036	2.94941	4.83184	2.78202	4.18551	5.13217	3.23975	7.7875	6.3683	4.57278	2.21269	4.46555	7.44953
ALDH1A1	Aldehyde dehydrogenase 1A1	21.0572	15.7972	37.3158	19.2844	15.5134	12.8214	25.108	10.0522	14.5562	53.7281	14.5953	23.0833	14.6968	17.8641	354.178	9.91917	24.5431
ALDH1A2	Retinal dehydrogenase 2	0	0.911758	1.75628	1.2975	0.656307	1.23576	0.745439	0	1.02482	1.68036	1.00418	2.80736	2.48327	0.131698	3.74473	1.29591	3.06358
ALDH1A3	Aldehyde dehydrogenase family 1 member A3	1.84885	1.57899	1.75385	1.75997	1.34774	1.9676	2.19539	1.09789	1.85033	3.01302	2.76383	7.46961	5.65618	2.8568	5.78124	3.02535	6.87114
ALDH1B1	Aldehyde dehydrogenase X, mitochondrial	4.33212	19.6961	24.3161	16.928	23.928	39.7224	40.3099	4.2851	14.075	79.5795	23.5891	60.7852	107.256	5.77538	34.8916	94.4442	22.3784
ALDH1L1	Cytosolic 10-formyltetrahydrofolate dehydrogenase	53.3336	53.5895	131.672	99.8864	62.5183	47.5703	92.5363	35.6255	82.3092	113.947	44.8861	126.823	75.8618	135.888	135.245	71.3469	233.522
ALDH1L2	Mitochondrial 10-formyltetrahydrofolate dehydrogenase	5.96349	4.01125	8.26596	8.60808	4.59734	5.84031	7.93437	5.97394	6.41429	7.07459	8.79452	18.5694	10.0606	9.77418	9.6188	8.54231	14.2472
ALDH2	Aldehyde dehydrogenase, mitochondrial	16.0103	50.2782	48.6064	34.8744	31.3984	34.422	53.1633	19.9692	29.4136	138.357	26.5468	35.8507	112.053	22.079	215.09	85.4821	43.1945
ALDH3A2	Aldehyde dehydrogenase family 3 member A2;Isoform of P51648, Isoform 2 of Aldehyde dehydrogenase family 3 member A2	22.7144	19.52	24.4677	33.6361	21.8377	32.654	31.0107	35.6009	28.3693	22.8193	29.276	51.7366	47.2306	41.5605	11.4662	27.1316	37.2331
ALDH4A1	Delta-1-pyrroline-5-carboxylate dehydrogenase, mitochondrial	141.841	252.51	80.6293	300.197	126.884	204.379	318.869	191.32	183.336	298.196	526.032	367.534	229.469	333.028	111.743	357.664	514.551
ALDH5A1	Succinate-semialdehyde dehydrogenase, mitochondrial;Isoform of P51649, Isoform 2 of Succinate-semialdehyde dehydrogenase, mitochondrial	9.26618	17.9052	5.2613	36.805	8.41602	23.8471	16.0588	16.0532	10.3717	28.3532	14.2106	31.1529	8.72817	33.9219	9.3244	11.1449	22.0409
ALDH6A1	Methylmalonate-semialdehyde dehydrogenase [acylating], mitochondrial;Isoform of Q02252, Isoform 2 of Methylmalonate-semialdehyde dehydrogenase [acylating], mitochondrial	33.335	62.084	62.2577	113.294	70.3245	114.561	179.024	135.694	51.2919	102.047	106.148	120.475	102.523	174.293	34.9882	71.0845	77.291
ALDH7A1	Isoform of P49419, Isoform 2 of Alpha-aminoadipic semialdehyde dehydrogenase	5.43752	8.30576	8.92264	15.0351	7.04056	7.28343	16.0108	6.61395	5.6526	11.3947	9.86079	11.6011	11.8174	13.2367	7.85093	7.30761	15.0463
ALDH9A1	4-trimethylaminobutyraldehyde dehydrogenase	19.2177	12.8316	12.7524	27.8231	15.1289	26.6033	16.2148	25.0415	24.3416	26.6257	34.6986	22.5527	18.5748	19.547	21.8888	14.7664	20.928
ALDOA	Fructose-bisphosphate aldolase A	1063.65	723.068	1958.36	1421.04	1160.4	236.775	392.024	455.366	1030.26	2558.01	327.425	484.728	243.85	362.393	2340.57	275.154	704.253
ALDOC	Fructose-bisphosphate aldolase C	2.37247	8.68519	2.56503	4.16683	2.71961	2.47364	2.62611	1.6934	0	7.52838	2.78876	5.0524	2.06264	3.13026	4.38552	2.67716	5.82812
ALG1	Chitobiosyldiphosphodolichol beta-mannosyltransferase	1.13318	1.30071	0.849363	0.803538	1.19731	1.10901	1.18526	1.07711	0.549729	0	1.6979	2.82162	2.14005	1.79259	0	0.41877	2.5161
ALG11	GDP-Man:Man(3)GlcNAc(2)-PP-Dol alpha-1,2-mannosyltransferase	1.91735	1.75299	2.99291	4.71418	2.06541	2.50401	4.46079	3.31635	1.19743	1.59993	3.59759	8.21293	7.84374	9.59357	1.86389	1.28078	8.55714
ALG12	Dol-P-Man:Man(7)GlcNAc(2)-PP-Dol alpha-1,6-mannosyltransferase	0.714333	0.353655	0.272391	0.557194	0.220448	0.558645	0.613355	0.445001	0.474623	0	0.3802	1.32708	0.66992	1.20498	0	0	0.980457
ALG2	Alpha-1,3/1,6-mannosyltransferase ALG2	3.21441	3.11802	3.82554	4.13815	3.07119	4.71233	3.84426	4.09695	3.3262	3.09387	5.02125	8.35792	6.80649	4.98403	0	3.40154	7.70422
ALG5	Dolichyl-phosphate beta-glucosyltransferase	5.06525	5.56646	5.98264	6.69278	7.20953	6.99738	12.4541	7.75998	3.36317	4.76542	10.1838	14.3317	11.2596	15.1943	3.24579	7.82303	16.6276
ALG9	Alpha-1,2-mannosyltransferase ALG9;Isoform of Q9H6U8, Isoform 3 of Alpha-1,2-mannosyltransferase ALG9	1.78156	1.59397	1.63679	1.88498	1.4448	2.95962	2.07068	2.75715	4.1357	6.85017	1.65963	3.07254	2.14646	2.83844	0	0.810915	2.86833
ALKBH3	Alpha-ketoglutarate-dependent dioxygenase alkB homolog 3	1.09044	1.07196	0	1.24711	0.719958	1.27302	0	1.31935	3.06937	1.89977	1.27942	1.08342	0	1.69075	2.22906	2.03084	1.61558
ALKBH4	Alpha-ketoglutarate-dependent dioxygenase alkB homolog 4	1.22688	1.16783	1.75871	1.46052	1.26156	1.11362	1.44848	1.45734	0.743616	1.87586	1.46998	2.15525	1.87251	2.31996	2.32552	1.45907	2.24196
ALKBH5	RNA demethylase ALKBH5;Isoform of Q6P6C2, Isoform 1 of RNA demethylase ALKBH5	1.97515	3.1958	4.2169	2.70524	2.4044	3.2459	4.16401	4.60745	3.58797	1.77093	4.57311	4.78077	3.51256	4.31698	1.7451	2.58033	3.72159
ALOX5	Polyunsaturated fatty acid 5-lipoxygenase;Isoform of P09917, Isoform 3 of Polyunsaturated fatty acid 5-lipoxygenase	0	0.443179	0	0	0	0	0	0	0	0	0	1.30376	0.812313	0	0	0	1.35185
ALOX5AP	Arachidonate 5-lipoxygenase-activating protein	64.2245	35.9732	44.7809	55.4378	37.0857	38.365	25.4807	25.6602	32.9267	41.6295	45.7417	41.5813	59.5009	26.735	43.8754	36.7008	44.8362
ALPK3	Alpha-protein kinase 3	26.903	17.5865	25.8281	32.8629	22.3207	24.3072	43.9149	48.1904	33.331	17.1712	48.3183	35.3914	58.4687	47.8388	16.0517	24.7614	64.8379
ALS2	Alsin	2.73653	1.94975	2.03092	3.02487	2.3153	2.54411	2.68233	2.5105	3.12643	2.78164	2.21163	3.7179	2.75945	3.85638	2.83218	2.4933	4.90263
ALYREF	THO complex subunit 4	1.49796	0.916599	0.798166	0.822823	1.0457	3.06081	2.61645	3.6038	2.09869	1.54171	3.80463	2.87011	1.09074	2.19069	0	2.21909	1.59195
AMBP	Protein AMBP	0	0.443179	0.901349	5.06881	0.526268	1.62906	2.10626	1.43734	0.987526	3.24341	4.18998	1.85182	2.20812	6.94513	7.30501	1.92077	5.84694
AMFR	E3 ubiquitin-protein ligase AMFR	2.10718	1.42883	1.92749	1.91825	1.77381	2.88294	2.28935	2.81618	2.85068	1.79061	2.95537	3.74885	2.38464	2.86669	0	2.37506	3.82057
AMN1	Protein AMN1 homolog;Isoform of Q8IY45, Isoform 2 of Protein AMN1 homolog	4.70653	7.40081	5.87886	6.08844	6.40335	3.85954	5.93215	3.59882	2.60585	4.17255	5.15955	7.01452	9.10381	12.8908	6.18046	6.80887	7.66176
AMPD1	AMP deaminase 1	188.495	385.815	371.187	499.466	357.032	685.071	207.784	780.119	517.546	181.719	293.503	954.329	130.985	692.437	203.433	188.962	436.042
AMPD2	AMP deaminase 2;Isoform of Q01433, Isoform Ex1A-2-3 of AMP deaminase 2	2.16871	1.908	2.81964	2.46892	1.89543	1.84942	2.59007	1.50716	2.38313	2.45698	1.94452	5.56286	4.67222	3.50655	2.64497	2.70007	5.15381
AMPD3	AMP deaminase 3;Isoform of Q01432, Isoform 2 of AMP deaminase 3;Isoform of Q01432, Isoform 3 of AMP deaminase 3	1.70373	2.13638	5.9579	2.67243	1.93111	6.1821	5.54897	3.03431	1.19083	4.27269	4.31034	8.95155	10.6444	4.1379	2.29467	4.5308	6.82227
AMPH	Amphiphysin;Isoform of P49418, Isoform 2 of Amphiphysin	0.549795	0.642805	1.43944	1.23511	0.951496	0.752377	1.08171	0.51376	1.11468	1.28293	0.720961	1.77623	1.47953	1.1489	1.92673	1.15578	1.80521
AMZ2	Archaemetzincin-2	11.102	17.202	19.7967	4.16108	19.1429	12.1881	32.012	21.358	15.7561	21.9736	10.7873	17.7868	14.4385	16.4543	24.2561	22.2165	12.5872
ANG	Angiogenin	0	2.13294	5.18195	2.35021	1.82813	0	2.23055	0	1.07139	2.97853	1.18689	4.01697	2.35626	0	9.42369	0	4.14695
ANGEL2	Protein angel homolog 2;Isoform of Q5VTE6, Isoform 2 of Protein angel homolog 2	0	0.503825	0.557305	0.75354	0.927058	0.977093	0.878642	0.965518	0.770812	0.620157	0.90701	1.6073	1.12234	0.951438	0.754955	0.667076	1.38016
ANGPTL2	Angiopoietin-related protein 2	0	0	0.330821	0	0	0	0	1.07488	1.32815	1.90591	1.31163	1.97287	1.09351	0	0	1.38158	0.915648
ANK1	Isoform of P16157, Isoform Er4 of Ankyrin-1	1.1197	0.760815	0.884694	1.40251	0.849585	0	1.87634	1.44365	0	0	0	2.61817	1.80977	2.60244	0	0	2.2926
ANK1	Isoform of P16157, Isoform 22 of Ankyrin-1;Isoform of P16157, Isoform 23 of Ankyrin-1	33.6512	19.9977	15.0208	40.7762	36.695	125.758	34.6427	106.699	30.5808	14.2594	61.6186	55.4879	29.7456	80.386	4.73501	31.8842	30.6569
ANK1	Isoform of P16157, Isoform Er5 of Ankyrin-1	45.4152	62.5431	49.9221	48.911	41.9379	54.53	146.255	120.354	71.5729	50.746	136.211	103.181	73.8454	119.641	24.5822	210.56	106.519
ANK2	Isoform of Q01484, Ankyrin-2;Isoform of Q01484, Ankyrin-2;Isoform of Q01484, Ankyrin-2	2.11057	1.82886	2.45072	2.81129	1.6129	1.36879	2.73031	3.11932	2.05896	2.21974	3.30379	3.15572	2.77986	2.83648	0.742884	2.79753	5.66277
ANK2	Isoform of Q01484, Isoform 4 of Ankyrin-2	18.7069	14.9479	15.9622	18.3361	15.4208	16.4035	22.7883	28.2983	20.2604	19.6789	29.0946	28.5495	20.6264	27.6045	11.0489	25.1985	35.8368
ANK3	Ankyrin-3	9.93804	8.39227	5.34925	9.44292	6.25615	11.5807	10.3303	19.9646	12.5878	11.8577	19.6206	13.8515	11.1667	18.0377	6.70071	14.0015	20.7362
ANKFY1	Rabankyrin-5;Isoform of Q9P2R3, Isoform 4 of Rabankyrin-5	8.28897	8.9491	9.06135	8.69573	7.66667	7.40518	9.28565	9.93255	10.7956	10.7597	11.899	17.5873	14.3921	14.5875	4.93538	15.3241	18.2612
ANKHD1	Isoform of Q8IWZ3, Isoform 6 of Ankyrin repeat and KH domain-containing protein 1	2.41269	2.27761	2.9566	3.04093	2.79323	3.49974	4.8374	4.27524	2.37219	2.74348	4.00601	5.33701	5.19545	4.78498	3.32369	3.20387	5.19193
ANKMY2	Ankyrin repeat and MYND domain-containing protein 2	4.58248	5.94538	5.22388	4.8776	4.88998	7.04102	5.9226	5.58548	4.60732	4.37423	4.72946	10.067	6.92187	7.55754	5.18467	4.37296	6.5483
ANKRD1	Ankyrin repeat domain-containing protein 1	8.5212	7.47101	12.7378	6.21021	4.33119	10.3166	16.6384	6.80394	10.5962	0	0	10.0948	13.2961	22.876	7.21475	5.67512	18.1773
ANKRD10	Ankyrin repeat domain-containing protein 10	1.71989	1.29086	0	2.22949	2.52236	4.4559	2.06211	2.0289	1.44727	1.49005	1.96794	4.22861	3.26154	3.58823	2.06786	1.48962	4.72747
ANKRD13A	Ankyrin repeat domain-containing protein 13A	1.13136	1.56884	2.01462	1.47573	1.26826	1.05617	2.07497	1.38376	1.82578	3.23744	1.44149	3.34579	2.36768	2.374	4.15356	3.18328	3.12053
ANKRD2	Ankyrin repeat domain-containing protein 2	133.076	131.668	419.656	84.6655	142.17	145.961	231.586	62.5116	193.486	236.266	104.764	165.081	130.054	147.632	628.089	115.392	228.417
ANKRD28	Serine/threonine-protein phosphatase 6 regulatory ankyrin repeat subunit A	5.72402	4.38712	4.23246	5.76244	4.20346	5.39182	7.17484	7.24203	5.48844	4.62276	6.75635	9.89004	6.37123	9.6712	2.89415	5.49256	12.0512
ANKRD35	Ankyrin repeat domain-containing protein 35	4.79734	5.8288	5.78353	5.98834	3.72655	3.27142	4.11067	4.97807	7.59711	5.98276	5.06538	5.22634	4.01812	5.09308	7.43569	4.43481	7.72376
ANKRD39	Ankyrin repeat domain-containing protein 39	0	1.69114	0	1.58346	1.20811	0	0.67891	1.57384	1.15172	2.26048	1.6773	1.82809	2.40449	2.49448	1.52834	0.992602	2.88754
ANKRD40	Ankyrin repeat domain-containing protein 40	0.814518	0.839613	0.888368	1.0373	0.65029	0.770967	1.17845	1.13465	1.39299	0.883897	1.3017	1.55453	1.03615	1.21026	0.815119	0.888741	1.54785
ANKRD44	Serine/threonine-protein phosphatase 6 regulatory ankyrin repeat subunit B	0.460257	0.468575	0.799269	0.578238	0.579571	0.597222	0.735042	0.312796	0.671504	0.582373	0.666365	1.17679	1.01701	0.968234	0.21509	0.584084	1.43031
ANKRD54	Ankyrin repeat domain-containing protein 54	0	0.911758	0	0	1.02354	0	2.17978	0	1.40556	2.07779	1.96885	1.80301	2.78755	1.73373	1.21149	1.73091	2.31115
ANKS1A	Ankyrin repeat and SAM domain-containing protein 1A	4.65373	4.29615	8.40994	5.52976	4.73813	2.9726	6.08853	4.14344	3.67323	5.34566	4.69799	6.11502	3.87278	7.38721	3.84433	4.34285	6.45697
ANKZF1	Ankyrin repeat and zinc finger domain-containing protein 1	2.41102	0	3.89218	3.31517	1.41582	2.38416	4.49482	3.56583	3.32237	3.15502	4.1487	5.11444	3.2638	8.64531	5.16204	2.87723	4.54495
ANO10	Anoctamin-10	3.05352	2.5869	3.121	3.11033	3.02418	2.96849	2.31533	3.43527	4.84115	3.34119	3.31904	5.35424	3.53039	4.17619	2.69911	3.58654	5.38553
ANO5	Anoctamin-5	0	0	0	0	0	0	0.224756	0.194608	0.199595	0.249518	0.135616	0.421015	0.327283	0	0	0.365069	0
ANO6	Anoctamin-6;Isoform of Q4KMQ2, Isoform 2 of Anoctamin-6;Isoform of Q4KMQ2, Isoform 3 of Anoctamin-6	8.10216	6.60358	12.1197	8.30819	7.04056	7.79715	9.28992	7.29559	6.08623	6.44468	8.97867	17.7377	12.4889	17.3692	6.21042	7.85191	19.5357
ANOS1	Anosmin-1	0	1.50931	1.08316	1.02945	1.51324	2.89092	0	3.66151	1.77684	2.4138	3.02073	2.97028	1.60814	4.39016	0	2.15762	3.08055
ANP32A	Acidic leucine-rich nuclear phosphoprotein 32 family member A	44.6582	43.9015	43.1413	44.6382	35.5064	40.1546	56.743	49.347	44.0706	45.3525	56.1322	73.0126	84.1634	68.0268	32.4206	40.6139	89.2337
ANP32B	Acidic leucine-rich nuclear phosphoprotein 32 family member B;Isoform of Q92688, Isoform 2 of Acidic leucine-rich nuclear phosphoprotein 32 family member B	9.26191	12.3646	9.39708	18.7114	11.6549	8.91324	10.765	12.0326	24.2688	26.9216	13.5929	17.0607	18.9681	12.8434	10.4887	24.8356	22.9419
ANP32E	Acidic leucine-rich nuclear phosphoprotein 32 family member E	23.681	20.4776	19.306	20.0035	18.2939	22.2965	19.0288	28.5865	43.8782	33.3581	29.4722	27.7139	23.0528	30.4425	17.572	28.7458	29.7597
ANPEP	Aminopeptidase N	6.97912	6.19554	3.8565	7.10569	2.76189	13.497	0	9.23976	7.85324	4.44428	12.4857	16.3643	10.0722	4.21386	3.41839	8.72921	5.82678
ANTXR1	Anthrax toxin receptor 1;Isoform of Q9H6X2, Isoform 5 of Anthrax toxin receptor 1	0	0	0	0	0	0	0.523977	0	0.484227	0.349866	0.538161	0.740624	0.706355	0.520931	0.472086	0.536383	1.18612
ANXA1	Annexin A1	4.63554	5.11422	9.60048	4.70984	4.0115	2.56942	6.51947	4.07343	8.57134	9.82656	7.19303	5.88028	4.30649	4.18968	6.10269	7.02708	6.85534
ANXA11	Annexin A11;Isoform of P50995, Isoform 2 of Annexin A11	12.1619	13.9117	27.6371	22.6155	16.3835	16.8825	17.5676	18.4188	27.8515	25.7514	15.1814	30.9455	13.1499	18.4791	30.8831	14.6681	27.2037
ANXA2	Isoform of P07355, Isoform 2 of Annexin A2	10.9169	9.26359	19.4936	14.5347	11.7356	17.4436	9.68528	15.405	19.0875	17.1081	14.3289	26.5398	21.0486	10.4732	8.85158	9.76282	23.0425
ANXA3	Annexin A3	4.97738	7.58192	10.3322	6.77339	6.04097	2.83685	4.81074	3.04551	5.07398	7.75	2.67493	4.16772	3.28793	5.41228	12.3629	1.77001	4.84651
ANXA4	Annexin A4;Isoform of P09525, Isoform 3 of Annexin A4	0	0	3.20843	0	0	0	0	0	0.818745	2.16024	0	0	8.3315	0	6.41093	0	0
ANXA5	Annexin A5	146.521	187.62	282.353	329.766	151.184	63.2318	100.534	35.5353	225.813	263.088	53.2736	373.077	185.406	179.135	489.239	77.835	484.874
ANXA6	Isoform of P08133, Annexin	0.886341	1.18872	1.51354	1.87286	1.06196	0.706376	1.17385	0	0	0	0	1.82347	0.839891	2.43433	0	0	1.5168
ANXA6	Annexin A6	417.639	564.52	546.252	712.043	449.269	119.656	227.726	103.195	396.14	624.024	66.5904	488.2	159.119	486.497	477.442	179.877	355.819
ANXA7	Annexin A7;Isoform of P20073, Isoform 2 of Annexin A7	4.90683	6.16282	9.01765	7.38425	5.49044	2.88095	6.18034	3.18831	8.4908	14.6758	3.28709	7.04365	4.88791	7.03688	24.1391	4.5131	9.37624
AOC3	Membrane primary amine oxidase	17.2982	25.0426	32.9908	24.491	18.3784	8.30493	15.0249	13.8951	9.82763	16.207	9.88808	23.0939	21.9697	25.1756	20.6834	11.6218	18.7339
AP1B1	AP-1 complex subunit beta-1;Isoform of Q10567, Isoform B of AP-1 complex subunit beta-1	20.6776	21.2755	23.1469	22.1109	19.2578	19.913	27.4228	24.0359	21.3525	21.9433	24.2165	36.7788	25.9074	30.6818	15.9485	22.7026	39.512
AP1B1	Isoform of Q10567, Isoform 4 of AP-1 complex subunit beta-1	11.9317	9.98572	12.9328	12.9302	11.4685	5.96535	12.3115	8.29393	13.4539	12.6882	11.0946	11.6519	8.79474	14.2357	16.4029	9.1343	20.5603
AP1G1	AP-1 complex subunit gamma-1;Isoform of O43747, Isoform 2 of AP-1 complex subunit gamma-1	8.13956	8.83852	11.8411	8.98889	6.59488	4.49817	13.2164	4.64046	3.25798	5.70297	5.50442	14.615	7.88357	13.1668	6.27944	3.56513	16.9562
AP1M1	AP-1 complex subunit mu-1	23.1687	18.6758	20.2625	22.465	17.5633	23.4226	29.7038	28.8643	23.4881	20.3517	29.4382	38.521	26.6087	33.6419	9.6721	22.3653	41.4695
AP1S1	AP-1 complex subunit sigma-1A	0.549795	0.889568	0.776235	0.792513	0.897857	1.01399	1.43223	1.27779	1.1388	1.00393	1.32103	2.91406	2.44469	1.8213	0.661791	1.53559	2.57293
AP1S2	AP-1 complex subunit sigma-2	15.0003	14.3608	13.9667	18.4377	13.7027	17.8335	21.7677	19.0748	13.181	10.6685	23.0257	25.521	17.751	24.6366	6.81743	11.4756	30.6499
AP2A1	AP-2 complex subunit alpha-1;Isoform of O95782, Isoform B of AP-2 complex subunit alpha-1	15.3427	15.048	15.5272	13.204	12.8029	14.6972	18.5188	19.7861	17.3081	16.1251	19.4676	26.7977	18.7509	20.4071	9.61216	19.1106	29.7118
AP2A2	Isoform of O94973, Isoform 2 of AP-2 complex subunit alpha-2	4.97738	4.88742	4.4998	4.81844	4.09267	3.90693	6.08572	5.4508	4.73095	4.53525	5.93078	9.30032	6.12101	5.68042	3.79595	5.26229	10.0283
AP2B1	AP-2 complex subunit beta;Isoform of P63010, Isoform 2 of AP-2 complex subunit beta	12.5661	10.4998	11.5158	10.6956	10.6563	12.5209	15.2129	16.3403	13.3214	11.9344	17.1006	22.0545	15.69	16.8299	7.3913	14.9684	24.5713
AP2M1	AP-2 complex subunit mu;Isoform of Q96CW1, Isoform 2 of AP-2 complex subunit mu	165.654	152.363	161.099	150.213	139.543	158.575	205.453	217.801	181.781	171.554	208.407	303.877	212.091	208.68	92.3679	197.595	333.295
AP2S1	AP-2 complex subunit sigma	20.5069	18.2928	24.7169	27.4983	15.9738	21.1415	26.1524	23.0548	15.6621	14.669	29.5673	46.5584	25.1376	27.5728	21.6681	17.5338	52.0749
AP3B1	AP-3 complex subunit beta-1;Isoform of O00203, Isoform 2 of AP-3 complex subunit beta-1	3.54324	3.3295	6.5886	5.13696	2.75681	3.33992	5.91034	4.176	8.28989	11.298	2.73786	16.0509	9.91798	10.924	6.25203	21.0269	16.3994
AP3B2	AP-3 complex subunit beta-2;Isoform of Q13367, Isoform 3 of AP-3 complex subunit beta-2;Isoform of Q13367, Isoform 4 of AP-3 complex subunit beta-2	0	4.68791	0	0	0	0	0	0	0	0	0	0	0	0	0	0	0
AP3D1	AP-3 complex subunit delta-1;Isoform of O14617, Isoform 5 of AP-3 complex subunit delta-1	4.6185	4.21094	4.45649	5.08284	2.78617	4.40896	6.06474	5.7314	2.95154	4.69463	5.25305	9.83327	8.92736	8.57986	0	2.11191	10.6519
AP3M1	AP-3 complex subunit mu-1	2.50785	2.41757	2.84376	2.69405	2.06399	2.26118	2.71089	2.81878	2.677	3.12249	3.49874	4.34809	3.40819	3.02608	0	3.01561	5.03998
AP3S1	AP-3 complex subunit sigma-1	1.0361	0.688144	0.76788	0.94147	0.594712	0.938936	0.832554	1.2772	1.56621	1.83781	1.26973	2.45357	2.03247	1.41867	0.730838	2.27602	2.48616
AP4B1	AP-4 complex subunit beta-1	0.908031	0.849336	1.26968	0.803168	1.30529	1.66777	1.34157	1.98683	1.74682	1.34184	2.17176	2.44342	1.5287	1.79341	0	1.76756	2.27106
AP4E1	AP-4 complex subunit epsilon-1	2.15328	1.64391	2.69397	2.14095	2.10769	2.11123	2.14049	2.14615	1.89168	1.83106	2.66877	3.52045	1.9263	2.79113	0	1.49477	4.38661
AP4M1	AP-4 complex subunit mu-1	5.62601	3.85726	5.80488	4.8619	4.82844	5.39804	5.0074	5.77911	4.71899	5.12391	5.35441	9.16427	5.44783	6.87987	3.10114	5.18054	9.40435
AP4S1	AP-4 complex subunit sigma-1	6.21013	5.51797	8.31176	6.42845	5.59767	3.75177	5.88047	4.67693	5.10562	5.06876	6.71911	8.53293	5.49444	7.98878	4.67327	5.79262	10.2148
AP5M1	AP-5 complex subunit mu-1	2.0711	1.67486	1.77539	1.17789	1.90198	1.86524	2.81198	1.48102	1.15199	2.56922	2.37691	2.99915	2.40449	2.16611	1.82566	1.45571	4.58278
AP5Z1	AP-5 complex subunit zeta-1	3.15646	2.66857	4.33105	0	3.54085	0	2.51891	1.77444	2.17344	4.04764	1.87677	3.01646	1.66542	2.6846	2.81009	2.12166	3.30467
APAF1	Apoptotic protease-activating factor 1;Isoform of O14727, Isoform 4 of Apoptotic protease-activating factor 1	2.02535	2.57561	2.46373	2.7309	2.16774	1.84135	2.56928	2.60412	1.99595	2.10864	2.90611	3.47615	2.42786	2.95516	2.10243	2.25203	4.06751
APBA3	Amyloid-beta A4 precursor protein-binding family A member 3	0	0.365241	0.545247	0.859224	0	0.791655	1.62335	0.550377	0.374066	0.441267	0.285307	3.31817	2.35789	0.51107	0	0.605585	0.495711
APBB1	Amyloid beta precursor protein binding family B member 1;Isoform of O00213, Isoform 2 of Amyloid beta precursor protein binding family B member 1	0.635186	0.927853	1.40797	1.33846	1.12307	1.12703	1.75919	2.07759	1.42708	1.51566	2.10966	1.98015	2.7373	1.91197	0.437443	1.35511	1.91659
APBB1IP	Amyloid beta A4 precursor protein-binding family B member 1-interacting protein	0	0.819369	0	0	1.29273	0	0.917936	0	0.853785	1.98336	0.802439	0.827938	1.22243	0.528178	0.413353	1.11141	1.42899
APBB2	Amyloid beta precursor protein binding family B member 2;Isoform of Q92870, Isoform 4 of Amyloid beta precursor protein binding family B member 2	0	1.46379	1.60581	1.87675	1.63421	1.75039	3.89504	3.04692	0	1.30587	2.08983	2.89133	2.7392	4.49242	1.25899	1.47494	2.39237
APC2	Adenomatous polyposis coli protein 2	20.2862	16.7911	82.2987	31.4707	26.068	18.1232	58.5076	7.37498	23.5966	129.629	8.08187	34.9944	27.6518	71.7762	375.942	21.806	31.9763
APCS	Serum amyloid P-component	7.76248	18.0127	11.0152	6.16888	8.25671	14.0228	27.8941	11.6966	15.2563	13.1372	22.8935	27.4535	31.3851	29.6675	16.8237	13.3713	30.8268
APEH	Acylamino-acid-releasing enzyme	71.9119	75.176	137.973	111.559	72.0455	8.17967	61.9458	9.13609	28.0446	128.529	9.85172	39.4456	23.9344	88.3447	216.981	19.1723	116.716
APEX1	DNA-(apurinic or apyrimidinic site) endonuclease	4.43201	4.77067	5.47385	5.64295	4.20636	2.13371	5.19054	3.32553	3.6631	4.74681	4.45566	6.08833	3.95661	6.73877	7.65457	2.53323	8.02839
API5	Isoform of Q9BZZ5, Isoform 2 of Apoptosis inhibitor 5	1.84247	0	0.840414	1.6181	0.594165	1.12056	1.00372	1.6864	1.88646	1.57326	1.49628	1.86079	1.55605	1.65455	2.14843	1.30069	1.84556
APIP	Methylthioribulose-1-phosphate dehydratase	3.49785	2.24584	6.88166	7.79662	4.44536	3.67143	0	2.17401	4.14046	5.71086	1.75554	7.00484	2.65291	3.78513	10.6028	1.75904	6.15501
APMAP	Adipocyte plasma membrane-associated protein	1.35675	1.48177	2.39107	2.44403	1.60069	1.79158	2.84716	2.05902	2.72113	3.26213	2.74544	6.90078	4.15167	2.3544	2.32071	2.28389	2.73797
APOA1	Apolipoprotein A-I	164.703	399.926	197.33	352.295	252.062	192.015	422.583	414.916	352.086	403.647	481.961	264.361	636.536	580.471	363.514	1087.36	268.305
APOA2	Apolipoprotein A-II	3.18934	6.14864	7.30286	5.62479	5.48665	11.0621	22.4808	14.715	7.72056	17.1554	27.9326	18.3526	15.7988	28.5944	23.4812	19.7504	28.2637
APOA4	Apolipoprotein A-IV	10.2259	16.1094	42.9431	20.0173	9.55448	2.33634	13.011	2.66723	9.0834	37.5666	2.53578	21.657	25.729	21.3885	221.575	7.98317	55.7608
APOB	Apolipoprotein B-100	56.2213	125.684	58.9106	63.1548	52.0963	49.4921	186.686	66.2156	64.7513	110.256	117.954	145.311	181.561	263.682	78.908	219.521	175.037
APOBEC2	C->U-editing enzyme APOBEC-2	223.152	230.983	283.853	183.15	196.565	106.032	157.947	132.544	133.521	229.616	108.646	166.187	106.641	268.337	257.763	131.697	191.482
APOBR	Apolipoprotein B receptor;Isoform of Q0VD83, Isoform 3 of Apolipoprotein B receptor	0	0	0	4.88885	0	6.30138	3.06134	6.99134	4.18744	0	4.52597	4.87976	5.1018	3.85461	0	3.55365	4.10609
APOC1	Apolipoprotein C-I	2.7842	3.22017	0	3.86017	3.8771	9.50464	3.73691	4.78256	5.53285	17.6117	5.91442	0	6.92346	6.20412	6.60573	39.8543	2.95072
APOC2	Apolipoprotein C-II	7.62607	8.34026	3.95178	6.94395	7.12372	18.9294	15.3184	8.46955	17.047	18.126	46.8502	14.3119	15.4783	26.3621	6.92661	77.5667	22.2192
APOC3	Apolipoprotein C-III	1.10383	2.56436	2.83722	2.01793	2.50961	10.3523	16.4026	12.424	6.95743	15.0765	24.0332	16.1509	10.9175	23.1036	15.1817	13.7017	22.1988
APOD	Apolipoprotein D	1.22208	3.11802	3.62154	0	1.63684	2.592	4.87542	0	0	0	3.5753	4.96933	4.29658	3.98731	3.7301	0	7.23984
APOE	Apolipoprotein E	3.05915	5.6439	8.61774	3.33048	4.82844	21.0832	37.146	24.0083	16.682	37.3165	41.5635	33.2735	24.1503	46.8576	37.9159	33.3945	50.5043
APOF	Apolipoprotein F	0.911173	1.62884	1.76723	1.97245	1.76363	1.26455	7.01313	3.65814	1.78957	3.15429	5.79311	3.81855	7.17502	15.4447	6.20185	6.27011	7.24317
APOH	Beta-2-glycoprotein 1	7.10069	2.64533	3.19443	6.92	7.0812	15.8831	14.6222	16.8524	20.0516	16.0732	20.0268	11.1455	12.1457	15.2363	14.4518	19.9837	12.0373
APOL1	Apolipoprotein L1;Isoform of O14791, Isoform 2 of Apolipoprotein L1	8.34259	9.81023	4.3052	1.53782	3.37137	1.26019	3.00132	4.74855	3.89089	3.84947	11.2308	3.91199	2.78755	10.0226	7.01489	12.8996	7.15696
APOL2	Apolipoprotein L2	6.5223	3.63395	12.0668	8.3677	7.53715	6.62424	5.90762	5.08582	5.18261	9.84921	8.98901	12.297	16.369	8.18051	8.06345	12.2765	18.8986
APOL3	Apolipoprotein L3;Isoform of O95236, Isoform 2 of Apolipoprotein L3	4.37019	3.92536	8.95351	3.7541	4.89899	2.61238	0	2.65192	0	4.07757	3.00616	3.82119	5.82939	0	0	3.53651	4.27296
APOM	Apolipoprotein M	9.3778	11.9999	4.57608	10.4089	7.79484	5.59031	13.0831	12.6724	7.79917	6.45656	22.393	7.03393	16.111	22.8813	10.9351	27.5344	8.5139
APOO	MICOS complex subunit MIC26	269.402	222.936	197.466	286.224	261.04	628.11	287.748	365.057	320.22	177.583	408.707	271.33	269.168	319.213	51.0647	226.087	140.744
APOOL	MICOS complex subunit MIC27	66.1303	48.5824	60.2273	75.1807	59.7182	87.4653	153.431	77.4927	48.2446	70.7134	70.9597	113.893	81.7755	140.114	23.8189	62.8601	98.5664
APP	Amyloid-beta precursor protein;Isoform of P05067, Isoform 11 of Amyloid-beta precursor protein;Isoform of P05067, Isoform L-APP733 of Amyloid-beta precursor protein;Isoform of P05067, Isoform APP751 of Amyloid-beta precursor protein;Isoform of P05067, Isoform L-APP752 of Amyloid-beta precursor protein	0.255859	0.299143	0.38432	0.314128	0.18604	0.279213	0.39556	0.561255	0.640839	1.17734	0.441583	0.6311	0.623768	0.981704	0	0.723394	0.959243
APPL1	DCC-interacting protein 13-alpha	31.2969	27.8535	33.496	38.6106	29.2824	23.0057	30.3328	27.6542	30.3144	36.4	31.025	45.4253	30.3405	43.3192	40.3108	28.1303	49.7885
APPL2	DCC-interacting protein 13-beta	4.17735	3.89564	4.05409	5.87227	4.2757	3.39731	6.12368	4.73435	3.85167	4.57406	6.52848	7.61374	5.81197	7.04499	3.48354	5.00697	9.64781
APRT	Adenine phosphoribosyltransferase	14.6927	22.3655	19.6967	16.8038	12.2916	10.01	10.5612	9.12348	13.1537	14.1482	10.4981	23.3614	27.4172	17.8929	29.6566	8.57976	67.9405
AQP1	Aquaporin-1	13.2495	11.3339	8.31368	7.55625	11.5666	7.86205	9.1984	6.64141	7.22185	6.09118	11.2723	5.41998	8.00245	17.5501	10.6273	14.8653	7.20989
AQP4	Aquaporin-4;Isoform of P55087, Isoform 1 of Aquaporin-4	281.191	184.45	24.4114	164.857	184.632	107.334	58.8996	272.873	162.536	0	168.854	130.346	64.9566	268.213	105.687	93.643	152.556
AQP7B	Aquaporin-7B;Putative aquaporin-7-like protein 3;Aquaporin-7	0.931968	0	0	0	0	0.63553	0	0	0	0	0.800593	1.73659	0	0	0	0	1.60224
ARAF	Serine/threonine-protein kinase A-Raf	21.7271	16.2585	22.7244	23.4534	17.7014	17.0465	18.9545	19.3669	15.8544	16.293	16.5201	27.0581	22.7051	34.0001	14.3986	13.2396	27.9016
ARAP1	Arf-GAP with Rho-GAP domain, ANK repeat and PH domain-containing protein 1;Isoform of Q96P48, Isoform 3 of Arf-GAP with Rho-GAP domain, ANK repeat and PH domain-containing protein 1	2.33292	3.49929	6.07705	5.10865	2.93973	2.90226	4.66243	2.9071	4.74841	5.33828	4.23167	8.70158	5.92275	6.54155	8.77649	3.61056	8.90899
ARAP3	Arf-GAP with Rho-GAP domain, ANK repeat and PH domain-containing protein 3	0	0.446046	0.564928	0.82453	0.676405	0.613106	0.70293	0.940071	0.909387	0.946676	1.26186	0.996777	0.860247	0.85621	0	0.88039	1.12468
ARCN1	Coatomer subunit delta	26.3088	23.1515	30.9594	28.1777	20.1098	26.4628	32.1375	30.2664	27.9865	27.6377	34.0653	58.4922	41.6892	43.8612	19.7479	30.7309	60.7056
ARF3	ADP-ribosylation factor 3;ADP-ribosylation factor 1	16.2555	8.95528	8.63561	15.7763	9.94047	11.4931	10.4499	9.21426	22.1334	26.8226	13.8329	12.5227	8.24942	20.6814	19.6526	22.0585	15.2486
ARF4	ADP-ribosylation factor 4	64.8038	62.4567	82.2419	87.7215	62.1165	45.5235	59.7465	38.7579	43.7068	61.5462	52.0609	124.394	77.059	78.0334	92.8797	37.3229	128.804
ARF5	ADP-ribosylation factor 5	6.11788	5.25145	6.80445	10.6147	5.40638	5.30684	8.02255	6.21814	7.4413	7.37737	7.91429	8.04078	8.63621	9.43801	5.5427	6.2918	9.90441
ARF6	ADP-ribosylation factor 6	6.63439	8.22772	9.39925	10.7277	8.53703	8.61858	9.57882	11.4067	7.66917	7.20944	12.4484	14.0184	10.2429	11.0887	9.23041	9.74934	16.7621
ARFGAP1	ADP-ribosylation factor GTPase-activating protein 1	1.33937	1.29056	1.76682	1.84037	1.48801	0.845738	1.79934	2.04061	2.10305	1.98382	1.65429	3.10598	2.70161	2.96401	0.859055	1.31576	3.55082
ARFGAP2	ADP-ribosylation factor GTPase-activating protein 2	2.35777	1.60946	2.46714	2.92218	1.79518	3.02438	4.57206	3.22374	4.51075	3.92918	3.59511	6.18726	4.39059	5.97558	0	5.41097	7.72376
ARFGEF1	Brefeldin A-inhibited guanine nucleotide-exchange protein 1	1.47232	1.31244	1.01296	1.2252	1.33078	1.62681	1.45483	1.57747	1.19522	0.951265	1.76487	2.74535	2.33197	1.91329	0	1.72137	3.29556
ARFGEF2	Brefeldin A-inhibited guanine nucleotide-exchange protein 2	195.75	124.646	188.492	174.183	145.716	172.797	207.832	133.801	121.604	152.933	142.696	219.431	251.839	219.018	78.8535	99.4432	305.02
ARFIP1	Arfaptin-1	8.00757	4.9247	10.399	7.38425	5.46899	9.24774	7.73592	7.5242	7.57441	11.768	5.53875	19.6788	13.9387	12.58	5.52231	7.9593	17.8949
ARHGAP1	Rho GTPase-activating protein 1	17.7746	16.5264	32.1435	19.0373	17.6525	14.9154	22.6941	15.6517	18.8951	30.2692	22.4601	32.3294	22.7417	17.3133	22.183	23.7342	27.6776
ARHGAP10	Rho GTPase-activating protein 10	7.67363	8.79183	14.7943	12.2915	14.0284	7.99348	11.2515	10.6087	11.8973	6.30233	8.5175	14.5144	9.10591	11.3105	6.81743	4.39921	14.7716
ARHGAP12	Rho GTPase-activating protein 12;Isoform of Q8IWW6, Isoform 4 of Rho GTPase-activating protein 12	1.34091	1.41605	1.61805	1.41745	1.37217	1.56148	2.17727	2.27699	1.78792	0	1.55673	3.45938	2.16433	3.48723	0.755303	0	2.92031
ARHGAP17	Isoform of Q68EM7, Isoform 5 of Rho GTPase-activating protein 17	9.96554	7.9998	10.7002	10.1861	8.539	8.8866	9.12246	9.64408	9.96205	10.2047	9.93601	18.9059	12.1597	12.4963	6.21042	9.38804	19.5807
ARHGAP18	Rho GTPase-activating protein 18	49.3061	39.873	47.2491	48.8434	39.1658	27.5953	37.4035	35.3477	43.8479	45.4048	33.567	78.4509	46.5933	68.9732	67.9549	42.2158	91.9028
ARHGAP24	Rho GTPase-activating protein 24	3.95823	5.10833	0	0	4.46588	0	0	5.86895	5.80428	0	6.35641	0	0	8.17863	4.41287	5.74216	9.65003
ARHGAP25	Rho GTPase-activating protein 25;Isoform of P42331, Isoform 3 of Rho GTPase-activating protein 25;Isoform of P42331, Isoform 4 of Rho GTPase-activating protein 25;Isoform of P42331, Isoform 6 of Rho GTPase-activating protein 25	0.665734	0.566212	0.836938	0.811533	0.574258	0.59791	0.883511	0.430884	0	0	0.475348	1.21227	0.926453	1.07567	0	0	1.48569
ARHGAP35	Rho GTPase-activating protein 35	1.46521	1.59433	2.40488	2.04836	1.78734	9.77093	2.37253	3.5922	3.67662	2.98127	3.64344	4.5123	2.7972	4.10374	3.62928	2.81498	5.36079
ARHGAP45	Rho GTPase-activating protein 45	0	0	0	1.66919	0	0	0	0	0	1.15825	1.35929	0	1.15086	0	0.840468	1.10886	2.22602
ARHGAP6	Rho GTPase-activating protein 6	1.09572	1.34859	1.92572	1.25431	1.39543	1.15701	1.90727	1.13648	2.00193	2.16472	2.25119	2.36591	2.51086	2.18968	2.46559	2.20635	2.59017
ARHGDIA	Rho GDP-dissociation inhibitor 1	77.9472	84.0194	171.156	129.869	75.3888	25.017	70.6663	22.4213	57.856	154.49	23.6272	106.831	71.2071	115.792	213.511	40.0659	232.396
ARHGDIB	Rho GDP-dissociation inhibitor 2	9.19392	8.79183	19.4086	15.7256	9.16868	5.34731	18.6386	4.37281	8.75485	18.357	6.70984	27.108	22.528	24.4107	26.8981	10.0133	44.2618
ARHGEF1	Rho guanine nucleotide exchange factor 1;Isoform of Q92888, Isoform 3 of Rho guanine nucleotide exchange factor 1	4.76542	4.50484	6.40462	6.13771	4.32123	3.65541	5.55025	4.96204	3.14375	5.82373	5.52729	10.7176	7.8293	7.10036	2.73288	5.01159	11.2106
ARHGEF10	Rho guanine nucleotide exchange factor 10;Isoform of O15013, Isoform 4 of Rho guanine nucleotide exchange factor 10;Isoform of O15013, Isoform 5 of Rho guanine nucleotide exchange factor 10;Isoform of O15013, Isoform 2 of Rho guanine nucleotide exchange factor 10;Isoform of O15013, Isoform 3 of Rho guanine nucleotide exchange factor 10	1.07771	0	1.60211	1.67574	0.950401	1.18505	1.14845	1.01616	1.03359	1.44811	0.695364	2.87341	1.76369	1.69973	0	1.57136	1.19105
ARHGEF10L	Rho guanine nucleotide exchange factor 10-like protein;Isoform of Q9HCE6, Isoform 2 of Rho guanine nucleotide exchange factor 10-like protein;Isoform of Q9HCE6, Isoform 3 of Rho guanine nucleotide exchange factor 10-like protein	4.15911	3.7556	3.37204	4.18221	3.25917	5.79743	6.91373	6.78829	5.14693	3.97834	6.65291	8.91863	6.12383	7.67857	2.7869	4.44606	10.5252
ARHGEF11	Isoform of O15085, Isoform 2 of Rho guanine nucleotide exchange factor 11	0	0	0	0	0	0	0	0	0.928215	0	0	0	0	0	0	0.907978	0
ARHGEF12	Rho guanine nucleotide exchange factor 12;Isoform of Q9NZN5, Isoform 2 of Rho guanine nucleotide exchange factor 12	2.13207	2.16212	4.08783	2.22795	2.12084	3.86488	2.79327	3.61544	3.43359	2.7271	3.29315	5.22274	3.68742	3.66843	2.24606	3.1621	5.63415
ARHGEF16	Rho guanine nucleotide exchange factor 16	0	0	0	0	0	0	0	0	0	0	0	0	0	0	0	0	0.83797
ARHGEF17	Rho guanine nucleotide exchange factor 17	0	0	0	0	0.175512	0	0	0.164422	0.0635988	0	0.210723	0	0.522063	0	0	0.128581	0
ARHGEF2	Rho guanine nucleotide exchange factor 2;Isoform of Q92974, Isoform 2 of Rho guanine nucleotide exchange factor 2;Isoform of Q92974, Isoform 3 of Rho guanine nucleotide exchange factor 2	0.817713	0.631073	0.997914	1.05805	0.778945	0.790744	0.718145	0.84969	0.644093	0.418795	1.09499	1.70176	1.28713	0.998804	0	0.96333	1.98531
ARHGEF37	Rho guanine nucleotide exchange factor 37	3.49382	2.62349	11.9067	3.72054	2.82623	2.46	4.17265	2.87184	2.66839	1.85867	3.30988	4.92264	2.52478	5.25751	0.919858	4.09803	4.02929
ARHGEF6	Rho guanine nucleotide exchange factor 6	4.63128	4.38207	5.39502	6.34025	3.57279	4.31257	7.48018	8.33222	4.3117	4.4494	7.49224	7.92315	7.83652	10.3058	1.77387	4.76623	11.7796
ARHGEF7	Isoform of Q14155, Isoform 1 of Rho guanine nucleotide exchange factor 7;Isoform of Q14155, Isoform 5 of Rho guanine nucleotide exchange factor 7	10.2212	9.49029	10.8391	9.92902	7.82721	9.20525	11.828	12.2169	10.4845	10.4208	12.6041	17.8073	14.5018	15.4128	5.75203	10.5457	20.2269
ARIH1	E3 ubiquitin-protein ligase ARIH1	10.8193	10.9013	11.5849	13.6429	9.86522	11.5488	12.578	15.95	13.3705	12.2124	17.4627	16.3606	11.3769	16.3373	7.71651	13.396	19.4057
ARIH2	E3 ubiquitin-protein ligase ARIH2	13.1735	11.0301	13.4243	15.5348	12.1341	14.0164	16.7924	20.7903	10.6967	13.4061	25.4456	17.5024	17.751	23.2691	5.46036	13.1545	23.4708
ARK2N	Isoform of Q96B23, Isoform 2 of Uncharacterized protein C18orf25	0.743363	0	0	3.77056	0	2.37157	0	3.40064	2.87971	0	4.02543	4.22083	2.83089	7.00616	0	0	6.4436
ARL1	ADP-ribosylation factor-like protein 1;Isoform of P40616, Isoform 2 of ADP-ribosylation factor-like protein 1	10.539	9.59797	9.71389	11.1354	11.6173	10.1376	15.15	13.2911	8.32623	12.2575	15.4886	12.7585	19.7026	9.03817	5.86167	9.2422	13.5154
ARL15	ADP-ribosylation factor-like protein 15	0	0	0	0	0.631258	0	0.926216	0.38651	0.730884	0	0.585615	1.4511	1.1123	1.21613	1.33297	0.235166	1.3653
ARL2	ADP-ribosylation factor-like protein 2	5.40382	6.78234	15.6564	11.3163	23.2438	8.47297	10.1745	5.12815	3.74066	10.1977	7.62802	19.0545	16.2751	13.7905	8.15119	3.05545	28.4661
ARL2BP	ADP-ribosylation factor-like protein 2-binding protein;Isoform of Q9Y2Y0, Isoform 2 of ADP-ribosylation factor-like protein 2-binding protein	1.46791	1.26642	2.32431	1.85143	1.24855	1.32781	1.57875	1.78017	0.907295	1.31462	2.11452	2.8754	2.21016	2.33443	2.35462	0.748644	3.06569
ARL3	ADP-ribosylation factor-like protein 3	2.67178	2.06861	3.39776	2.31743	1.63458	1.6483	1.97885	0.969752	3.66816	6.3256	2.10577	3.4938	2.84789	1.93322	4.2464	3.08301	3.51665
ARL5A	ADP-ribosylation factor-like protein 5A	1.26096	1.42062	2.36316	2.17473	1.37914	1.45961	1.34157	1.73205	1.23495	1.53639	2.00222	1.96607	1.2686	2.40924	1.12388	1.58992	2.79981
ARL6IP1	ADP-ribosylation factor-like protein 6-interacting protein 1;Isoform of Q15041, Isoform 2 of ADP-ribosylation factor-like protein 6-interacting protein 1	40.5229	28.8058	31.9296	42.5801	54.1635	82.7058	46.1543	53.2305	39.0705	55.3097	58.9538	69.839	98.9973	40.5864	21.5388	63.7052	37.3361
ARL6IP4	ADP-ribosylation factor-like protein 6-interacting protein 4;Isoform of Q66PJ3, Isoform 1 of ADP-ribosylation factor-like protein 6-interacting protein 4	0	0	0	0.233564	0.125866	0	0.122155	0.349109	0.0518858	0	0	0	0.373958	0.360645	0	0	0.225906
ARL6IP4	Isoform of Q66PJ3, Isoform 2 of ADP-ribosylation factor-like protein 6-interacting protein 4	4.37422	3.02607	4.5383	4.36824	3.91658	3.93311	8.18488	7.84984	3.18016	2.40216	6.0119	5.71739	6.70075	10.5288	1.2275	3.05827	6.58914
ARL6IP5	PRA1 family protein 3	205.164	166.065	221.408	267.305	210.575	293.113	391.843	362.544	322.366	225.944	333.282	436.112	354.832	459.918	122.355	271.941	396.578
ARL6IP6	ADP-ribosylation factor-like protein 6-interacting protein 6	0	0	0	0	0	0	0	0	1.33122	0	1.60995	0	0	1.68144	0	1.48962	0
ARL8A	ADP-ribosylation factor-like protein 8A	3.97925	3.60561	6.17722	4.85184	3.38226	3.744	4.3925	3.58476	6.61833	8.5566	6.83143	4.38933	3.78114	4.78278	9.36313	4.79485	8.80093
ARL8B	ADP-ribosylation factor-like protein 8B	4.2228	3.80259	4.69562	4.80846	3.79234	5.00998	5.14058	5.15657	4.79456	4.76762	7.44581	6.85327	4.67976	6.17562	2.94999	4.51934	7.10279
ARMC1	Armadillo repeat-containing protein 1	12.6096	13.7493	14.6789	14.1353	14.863	13.3671	15.7403	13.7107	14.476	14.5011	14.4681	24.4005	15.8498	20.8728	13.9676	14.0726	21.1509
ARMC10	Armadillo repeat-containing protein 10;Isoform of Q8N2F6, Isoform 3 of Armadillo repeat-containing protein 10	1.48286	2.00807	2.53509	3.08465	1.72706	1.53793	1.9889	1.34512	2.323	3.25688	1.55243	3.40172	3.14502	2.55729	2.69415	2.5833	3.38165
ARMC6	Armadillo repeat-containing protein 6;Isoform of Q6NXE6, Isoform 2 of Armadillo repeat-containing protein 6	3.46658	3.23132	3.36429	4.09549	3.29463	3.70455	5.64303	5.28397	3.48376	5.63121	6.82043	6.78107	6.92027	7.55232	3.86119	5.77664	8.67019
ARMC8	Armadillo repeat-containing protein 8	4.34711	3.6896	3.79309	4.26291	3.3807	5.00537	5.8981	5.13642	4.05461	3.58675	5.48797	8.22807	6.51063	6.34571	2.3042	4.38506	8.49628
ARMCX1	Armadillo repeat-containing X-linked protein 1	1.0404	0.619697	0.863959	0.550309	0.525662	1.49051	2.33621	1.80119	1.13618	0.905319	1.22889	3.10955	3.21902	2.14625	0.184256	0.938156	1.8194
ARMCX2	Armadillo repeat-containing X-linked protein 2	0.647144	0	0.598402	0	0	2.09091	3.62503	1.75009	0	1.69356	0.986761	3.65173	4.99716	1.86372	0	1.47868	1.97983
ARMCX3	Armadillo repeat-containing X-linked protein 3	5.3728	4.15412	7.22426	4.70767	4.32521	7.06701	12.6827	12.5015	7.06722	6.04925	8.61811	11.4419	13.3759	12.609	3.04313	6.44577	9.16703
ARMH3	Armadillo-like helical domain-containing protein 3	1.18168	1.0614	1.21757	1.20533	1.21593	0.533625	1.6395	1.11266	1.45696	1.6684	1.38775	2.19381	1.57262	1.7823	1.11949	1.51976	2.95208
ARMT1	Damage-control phosphatase ARMT1	81.5456	74.7962	91.7895	89.3524	86.6976	50.9138	82.7965	47.5949	39.0075	61.6739	59.4308	93.0889	58.874	96.312	61.8331	39.726	95.4396
ARNT	Aryl hydrocarbon receptor nuclear translocator;Isoform of P27540, Isoform 2 of Aryl hydrocarbon receptor nuclear translocator;Isoform of P27540, Isoform 3 of Aryl hydrocarbon receptor nuclear translocator;Isoform of P27540, Isoform 4 of Aryl hydrocarbon receptor nuclear translocator	0.788135	0.687827	0.603383	0.746116	0.518092	0.676139	0.737925	0.829393	0.41025	0.113528	0.564822	1.0693	1.19048	0.800719	0.598441	0.51722	1.06299
ARPC1A	Actin-related protein 2/3 complex subunit 1A	1.18468	0.660662	1.74419	1.03946	0.738766	0	0.628221	2.36407	1.378	1.48526	1.00303	1.6916	0.848639	1.39085	2.03527	0.725229	2.85055
ARPC1B	Actin-related protein 2/3 complex subunit 1B	0	3.62226	3.47531	3.38303	2.53867	2.30959	2.92693	2.27227	4.27217	3.84151	2.59425	5.61433	4.08059	3.52598	7.5426	2.93545	6.56945
ARPC2	Actin-related protein 2/3 complex subunit 2	7.8868	6.60662	9.79475	7.7198	6.24463	5.18723	6.13638	6.44111	11.6479	9.87646	8.58444	11.5292	6.75963	6.98844	11.9295	8.22196	15.0775
ARPC3	Actin-related protein 2/3 complex subunit 3	4.39138	3.79734	5.8357	4.7974	3.60252	3.25639	4.39554	4.51711	6.55766	7.05995	6.83616	7.79468	3.81613	4.46252	6.14923	8.20871	9.44558
ARPC4	Actin-related protein 2/3 complex subunit 4;Isoform of P59998, Isoform 3 of Actin-related protein 2/3 complex subunit 4	20.6586	15.6092	29.566	21.9233	16.6382	16.8126	14.9284	14.5098	28.4543	32.9383	15.1395	25.775	20.976	15.3278	27.9525	10.263	39.5302
ARPC5	Actin-related protein 2/3 complex subunit 5	4.89667	4.26068	8.11135	6.1081	4.80958	4.6659	6.32575	4.29992	7.67801	9.38645	4.4721	8.11331	5.90776	6.11618	5.46539	3.89471	11.1206
ARPC5L	Actin-related protein 2/3 complex subunit 5-like protein	5.74911	7.61166	10.3203	6.61921	5.25541	5.58131	0	5.0508	12.1241	12.5026	4.99128	9.61387	8.49617	11.4072	19.7661	5.94806	9.45864
ARPIN	Isoform of Q7Z6K5, Isoform C15orf38-AP3S2 of Arpin	5.65198	6.27884	8.44099	8.92907	5.62091	4.36954	6.06893	6.47084	6.28129	8.05938	7.13201	9.29818	7.84193	10.3892	8.99127	6.57166	11.1668
ARPP19	Isoform of P56211, cAMP-regulated phosphoprotein 19	0.444734	0.826379	1.01343	1.33446	1.49833	2.79792	1.85957	4.0083	1.4238	1.21451	5.12994	4.25205	2.85445	7.54016	0	0	7.129
ARPP19	cAMP-regulated phosphoprotein 19	101.415	109.063	104.953	88.411	86.339	99.0457	144.216	107.142	24.2856	20.8738	113.504	173.22	98.2026	141.899	31.4428	35.7993	127.564
ARPP21	cAMP-regulated phosphoprotein 21;Isoform of Q9UBL0, Isoform 3 of cAMP-regulated phosphoprotein 21	0.875187	0.832682	1.98469	0.972313	0.893114	1.48572	1.84592	1.67209	1.80363	1.09195	1.90464	1.9382	4.0684	2.18062	1.87552	2.1816	2.29789
ARRB1	Beta-arrestin-1	0	0	0	0.971195	0	0.793297	0	0	0	0	0	0.492151	0	0	0	0	0
ARRB1	Isoform of P49407, Isoform 1B of Beta-arrestin-1	3.79316	3.24175	9.22982	5.79037	3.52052	3.73883	4.99588	4.01384	3.41231	5.06292	3.16674	10.5657	7.37095	7.52281	6.47025	2.05577	13.8079
ARRB2	Isoform of P32121, Isoform 3 of Beta-arrestin-2;Isoform of P32121, Isoform 5 of Beta-arrestin-2	0.51904	0.667543	0.777487	0	0.296898	0	0.629089	0.472129	0	0	0.75199	1.67802	0.915426	1.38829	0	0.510829	2.12975
ARRDC1	Arrestin domain-containing protein 1	0.776785	0.605173	0.792306	0.718963	0.528941	0.870835	0.972551	1.08508	0.828226	0.338455	1.03565	1.30376	0.914583	0.882633	0	0.717258	1.5575
ARSB	Arylsulfatase B	1.5729	0	4.79064	3.40884	2.65832	0	6.54655	3.40769	3.7718	5.50302	2.933	6.35036	4.91386	8.39422	38.7276	3.75038	9.44558
ART1	GPI-linked NAD(P)(+)--arginine ADP-ribosyltransferase 1	0.827944	0.447074	0.743692	0.954127	0.795256	1.73674	0.490696	0.95249	0.360204	0	0.836203	0	0	0.65265	0	0.310367	1.19242
ART3	Ecto-ADP-ribosyltransferase 3	2.83335	3.16067	4.46779	3.57937	1.71952	1.08227	1.72311	1.38344	1.61268	6.16597	1.56824	1.74903	1.55104	3.01565	10.1349	0	5.53005
ARVCF	Splicing regulator ARVCF;Isoform of O00192, Isoform Short of Splicing regulator ARVCF	0.961614	0.655057	0.67888	1.40898	1.18333	1.49843	1.65467	1.76506	2.01906	1.66917	2.46497	2.43836	2.15637	1.89749	0	2.51116	2.70538
AS3MT	Arsenite methyltransferase	0	0	0	0	0	0	0	0	0	0	0	0	0	0	1.49287	0	0
ASAH1	Acid ceramidase;Isoform of Q13510, Isoform 2 of Acid ceramidase	9.17911	10.4804	15.6312	13.5365	11.1406	9.55731	11.2308	10.6062	5.19815	5.81971	9.32206	16.233	16.8276	13.3315	4.12972	0	14.9015
ASAP1	Arf-GAP with SH3 domain, ANK repeat and PH domain-containing protein 1;Isoform of Q9ULH1, Isoform 1 of Arf-GAP with SH3 domain, ANK repeat and PH domain-containing protein 1	0	0	0	0	0	0	0	0	0.878109	0	0	1.85523	1.39773	2.18666	0.950432	1.42323	1.68201
ASAP2	Arf-GAP with SH3 domain, ANK repeat and PH domain-containing protein 2;Isoform of O43150, Isoform 2 of Arf-GAP with SH3 domain, ANK repeat and PH domain-containing protein 2	1.24796	1.08163	1.71551	1.59848	0.867575	1.03237	1.59042	0.537107	1.72405	0.986283	1.5864	2.15873	1.39998	1.83646	0.899127	0	2.69792
ASAP3	Arf-GAP with SH3 domain, ANK repeat and PH domain-containing protein 3;Isoform of Q8TDY4, Isoform 3 of Arf-GAP with SH3 domain, ANK repeat and PH domain-containing protein 3	1.52335	3.2039	1.49311	2.42385	1.22464	1.41819	2.47749	1.92026	3.36007	3.75666	2.84257	3.26887	2.42562	2.7503	1.80062	3.15846	2.75695
ASB1	Ankyrin repeat and SOCS box protein 1	4.30726	3.19359	3.91736	4.5468	3.93104	4.69392	6.45375	5.21868	3.2363	2.70148	4.60799	7.19611	4.85985	6.52049	1.54569	3.3287	6.84429
ASB10	Ankyrin repeat and SOCS box protein 10;Isoform of Q8WXI3, Isoform 2 of Ankyrin repeat and SOCS box protein 10	0.570822	0.200853	0.314046	0	0	0.981377	0.859631	0.704467	0.539074	0.202209	0.437635	0.896805	0.64673	0.837684	0	0.307097	0.658156
ASB11	Isoform of Q8WXH4, Isoform 3 of Ankyrin repeat and SOCS box protein 11	15.2265	15.2433	9.1705	18.3023	15.751	10.6032	20.1285	12.5649	11.7449	20.6396	23.2923	12.8439	8.14748	16.6219	13.3851	17.5338	27.3671
ASB12	Ankyrin repeat and SOCS box protein 12	6.11788	6.32091	8.44099	0	5.94575	5.81883	6.16328	6.61547	5.18261	7.06808	6.33449	7.8813	5.44532	7.6945	8.34298	4.80369	8.84563
ASB14	Ankyrin repeat and SOCS box protein 14;Isoform of A6NK59, Isoform 3 of Ankyrin repeat and SOCS box protein 14	5.11329	3.37038	2.55855	5.8104	4.3282	6.57107	7.5251	6.73226	3.14738	2.88139	5.89946	9.94485	3.63014	7.67327	1.89942	2.42535	5.64584
ASB15	Ankyrin repeat and SOCS box protein 15	2.56863	1.15022	0.941658	2.94243	1.21677	2.03721	1.9793	2.30919	1.70667	2.0319	4.37131	2.07443	0.973247	2.32424	0.612944	2.27235	4.44661
ASB16	Ankyrin repeat and SOCS box protein 16	0	0	1.37941	1.49007	0	1.27596	2.16776	1.68407	1.53479	0.574912	1.61552	1.64096	1.58498	2.64594	0	1.09062	1.80979
ASB2	Ankyrin repeat and SOCS box protein 2;Isoform of Q96Q27, Isoform 2 of Ankyrin repeat and SOCS box protein 2	0	0.867919	0	1.08945	0.831394	2.84666	2.83212	3.26558	1.96222	1.20726	2.44744	1.46554	0.979768	1.71783	0	1.12092	1.93878
ASB4	Ankyrin repeat and SOCS box protein 4	0.92961	0	0	0	0	0.212978	0.392837	0.191894	0.877301	0	0.433124	0.920869	0	0.984873	0	0	0.916492
ASB5	Ankyrin repeat and SOCS box protein 5	2.71082	2.86602	1.7579	4.3093	1.90505	1.87774	2.02354	2.79486	1.95952	1.44079	5.36799	2.9	1.43722	3.39219	1.93028	2.12851	6.52723
ASB6	Ankyrin repeat and SOCS box protein 6	0	7.55752	8.26025	0	7.28294	7.86929	9.46264	9.503	10.1777	6.27771	10.8246	18.2137	10.7355	0	6.65459	5.22366	17.7553
ASB8	Ankyrin repeat and SOCS box protein 8	4.85178	4.71389	4.94075	6.26334	4.69037	8.78893	6.25334	8.0013	5.46448	4.15051	6.12508	9.34971	4.22691	9.03817	3.86208	4.11032	7.10933
ASCC1	Isoform of Q8N9N2, Isoform 2 of Activating signal cointegrator 1 complex subunit 1	0.890842	0.742642	1.79347	0	1.67729	1.42048	0.939533	1.1702	2.16346	3.17762	1.32103	1.26677	0.712071	0	1.7439	2.25203	1.43923
ASF1A	Histone chaperone ASF1A	3.35275	2.69141	3.96272	3.61998	3.06625	2.60337	3.45471	3.5519	1.55113	2.9114	3.53112	4.79731	3.16172	5.22854	1.92939	1.67716	5.01105
ASH2L	Set1/Ash2 histone methyltransferase complex subunit ASH2;Isoform of Q9UBL3, Isoform 3 of Set1/Ash2 histone methyltransferase complex subunit ASH2	0	0.136358	0	0	0.216824	0.189817	0.391933	0.470068	0	0	0.434022	0	0.208893	0	0	0.259403	0.328722
ASL	Argininosuccinate lyase;Isoform of P04424, Isoform 3 of Argininosuccinate lyase	0	3.31497	5.69368	3.65516	2.94922	1.69682	2.82106	1.30245	1.43697	0.861195	1.64745	2.14881	1.34655	0	0	0	0
ASMTL	Probable bifunctional dTTP/UTP pyrophosphatase/methyltransferase protein	6.70966	6.59902	5.39502	5.62091	6.23171	11.351	11.003	8.44618	7.64625	10.9094	11.3113	17.426	15.5354	12.5251	7.24471	10.6531	15.9121
ASNS	Asparagine synthetase [glutamine-hydrolyzing];Isoform of P08243, Isoform 2 of Asparagine synthetase [glutamine-hydrolyzing]	0	0	0	0	0	0	0	0	0	0	0	0	0	0	0	0	0.486663
ASPA	Aspartoacylase	16.5768	11.5128	19.4578	9.70301	12.252	9.94342	9.0931	8.04935	4.54097	9.81525	9.99337	13.4585	8.8333	9.01946	45.5429	23.2367	16.7853
ASPH	Aspartyl/asparaginyl beta-hydroxylase	8.31191	5.92351	7.31296	11.0766	6.40925	10.9531	12.7178	12.2085	9.81406	6.64816	13.2865	21.1591	15.9046	13.4828	8.65607	7.62562	21.7184
ASPH	Isoform of Q12797, Isoform 3 of Aspartyl/asparaginyl beta-hydroxylase	141.287	100.92	159.843	158.346	84.7631	204.426	145.115	208.047	200.239	66.2982	175.393	224.956	103.282	204.824	58.8195	171.149	174.272
ASPM	Abnormal spindle-like microcephaly-associated protein	6.81869	0	0	5.95259	0	0	0	0	0	0	0	7.7875	0	0	0	0	0
ASPN	Asporin	52.8325	12.7051	64.0167	54.9296	22.0499	18.3415	9.12036	36.6151	20.8953	34.1508	20.3757	50.4892	25.5637	64.4734	19.5939	22.0483	58.8883
ASPSCR1	Isoform of Q9BZE9, Isoform 2 of Tether containing UBX domain for GLUT4	11.0663	12.0138	14.8625	15.1637	9.71196	11.3746	16.7037	10.8458	14.9159	17.3181	14.4748	19.0897	15.6035	15.6056	15.1538	16.7909	21.6985
ASS1	Argininosuccinate synthase	23.2863	42.5284	16.5994	15.1707	21.3504	85.3957	50.0625	83.977	63.4963	105.075	18.937	100.948	68.3791	135.108	68.363	10.4322	124.977
ATAD1	Outer mitochondrial transmembrane helix translocase	98.7872	69.1161	47.9836	91.6234	83.4271	311.269	124.943	227.751	58.9452	50.5477	183.363	172.028	127.709	150.619	17.9647	104.562	110.874
ATAD3A	Isoform of Q9NVI7, Isoform 2 of ATPase family AAA domain-containing protein 3A	69.1992	38.849	21.2223	16.8658	39.5373	66.3798	42.9054	95.03	49.722	60.0484	40.4401	46.2273	68.0022	58.6247	8.63816	44.5733	50.0528
ATE1	Arginyl-tRNA--protein transferase 1	2.28982	1.8171	2.29558	3.39318	2.27513	4.35648	4.86533	4.42854	2.43584	2.53514	4.2132	5.92786	5.09593	6.05871	1.28298	3.31646	4.31846
ATE1	Isoform of O95260, Isoform ATE1-2 of Arginyl-tRNA--protein transferase 1	13.5894	11.681	11.3709	18.493	12.4339	17.8787	18.523	22.2106	14.1954	14.4511	23.1532	24.0269	22.9416	25.8333	5.09825	15.0029	21.3122
ATG101	Autophagy-related protein 101	0.356206	0	0.635906	0.505017	0	0.587808	0.710742	0.448395	0.544564	0.613199	0	0.800568	0.561854	0.501395	0	0.364901	1.05713
ATG12	Ubiquitin-like protein ATG12	1.22857	0.81167	1.15131	1.12825	1.37882	1.18396	2.06449	1.40916	1.81071	1.36805	1.81515	2.2972	1.51958	2.00854	0	2.12068	3.31764
ATG13	Autophagy-related protein 13;Isoform of O75143, Isoform 2 of Autophagy-related protein 13;Isoform of O75143, Isoform 3 of Autophagy-related protein 13;Isoform of O75143, Isoform 5 of Autophagy-related protein 13	0.405229	0.333334	0.268283	0	0.323822	0.539555	0.77057	0.693044	0.410156	0.244907	0.816041	0.787586	0.86223	0.779615	0	0	1.26715
ATG16L1	Autophagy-related protein 16-1;Isoform of Q676U5, Isoform 2 of Autophagy-related protein 16-1	4.48643	2.84171	3.91555	4.834	3.63837	4.11657	6.09273	6.18672	4.25254	3.31972	5.72812	5.79026	4.60493	7.35157	2.15586	4.03529	7.66882
ATG2A	Autophagy-related protein 2 homolog A;Isoform of Q2TAZ0, Isoform 2 of Autophagy-related protein 2 homolog A	0.470003	0.443588	0.430024	0.487087	0.577839	0.807302	1.1725	1.14146	0.563052	0.602423	1.3023	1.36081	0.757745	0.957812	0	0.478382	1.45857
ATG2B	Autophagy-related protein 2 homolog B	0.84159	0.583821	0.936468	0.856261	0.568993	0.719177	1.02757	0.705603	0.826892	0.917279	0.849791	1.16412	1.18474	0.819371	0	0.897791	1.40971
ATG3	Ubiquitin-like-conjugating enzyme ATG3	12.5574	14.0955	18.1215	16.4667	13.6681	11.2237	16.8272	12.8991	11.6104	14.5178	16.2634	28.0413	21.7532	24.8302	14.5419	15.7534	27.799
ATG4A	Cysteine protease ATG4A;Isoform of Q8WYN0, Isoform 3 of Cysteine protease ATG4A;Isoform of Q8WYN0, Isoform 4 of Cysteine protease ATG4A	5.03617	3.77728	5.8721	6.39744	5.25905	6.11696	6.95364	6.669	6.88571	6.79519	9.75016	8.42749	6.02176	10.695	5.07366	6.29035	9.29456
ATG4B	Cysteine protease ATG4B;Isoform of Q9Y4P1, Isoform 2 of Cysteine protease ATG4B;Isoform of Q9Y4P1, Isoform 6 of Cysteine protease ATG4B	11.7355	11.681	14.1545	14.2628	12.3711	11.3903	14.3884	13.3432	12.1129	13.4153	14.4515	19.0414	14.6259	19.8235	10.5614	10.7938	19.8029
ATG5	Autophagy protein 5	1.97243	2.45064	3.38605	2.36432	2.30997	2.79599	3.44836	3.74594	3.53223	3.96097	3.70606	4.52791	3.37072	4.49863	3.42705	4.19445	5.16569
ATG7	Ubiquitin-like modifier-activating enzyme ATG7	7.5249	7.73712	7.80716	9.59414	7.07957	7.70789	9.16246	7.62361	8.97736	7.92321	11.5774	14.2757	10.7133	12.6935	9.9683	9.31698	18.8986
ATG9A	Autophagy-related protein 9A	2.5328	1.98417	3.60324	2.57517	1.94988	2.47763	3.2323	3.1222	2.78451	3.19891	3.98944	3.62659	2.40283	3.29519	2.55753	2.62528	4.38762
ATIC	Bifunctional purine biosynthesis protein ATIC	13.3506	7.02553	14.8899	36.9238	16.0475	14.4756	9.64522	8.65886	10.038	23.6049	12.4742	10.8492	7.07006	6.41624	41.9103	19.0623	13.9485
ATL1	Atlastin-1;Isoform of Q8WXF7, Isoform 2 of Atlastin-1	0	0	0.725259	0	0	0	0	0	0	0.419664	0.199027	0.847029	0.400335	0	0.541902	0	0.531042
ATL2	Atlastin-2	11.6279	11.3626	8.24125	15.9995	10.9751	15.5753	13.2407	20.2517	13.6348	12.7703	24.1053	17.9266	21.4005	20.8248	9.61437	15.6414	19.662
ATL3	Atlastin-3	8.41009	10.0526	19.3194	13.9254	10.0002	3.63108	11.9128	4.80906	6.56823	12.6009	6.54353	23.7792	17.8412	12.3874	13.4252	6.50392	30.2224
ATOX1	Copper transport protein ATOX1	6.87544	6.0587	10.2942	8.89009	6.40482	7.81332	5.08174	5.57905	4.50245	5.6364	3.21671	13.5331	8.95413	8.27714	6.53764	2.95852	14.9118
ATP11A	Phospholipid-transporting ATPase IH	11.5425	8.48749	5.64798	6.24894	8.11908	5.41422	4.73165	4.96319	3.18162	9.12434	5.27973	7.35357	11.9103	5.85572	2.14744	5.87997	8.17765
ATP12A	Potassium-transporting ATPase alpha chain 2;Isoform of P54707, Isoform 2 of Potassium-transporting ATPase alpha chain 2	1.29599	1.70757	2.262	1.93289	1.25576	1.21769	1.57947	1.16751	0.751015	2.341	0.81005	1.55596	1.26889	1.99931	1.55819	1.85385	1.937
ATP13A1	Endoplasmic reticulum transmembrane helix translocase;Isoform of Q9HD20, Isoform B of Endoplasmic reticulum transmembrane helix translocase	0.773038	0.976966	1.27495	1.25576	0.726787	1.13302	1.16443	1.15096	1.55793	1.30317	1.15801	2.33237	1.67233	1.4638	1.57044	1.44702	2.56879
ATP1A1	Sodium/potassium-transporting ATPase subunit alpha-1;Isoform of P05023, Isoform 4 of Sodium/potassium-transporting ATPase subunit alpha-1	35.884	32.6648	47.7522	42.2577	32.5167	37.3797	53.6059	35.6009	38.0407	48.1506	42.8758	106.267	52.2544	75.2801	38.4168	45.4439	89.4806
ATP1A2	Sodium/potassium-transporting ATPase subunit alpha-2	205.4	195.02	283.984	300.889	232.813	262.141	248.492	337.412	240.851	289.136	291.214	416.484	212.678	496.799	155.246	243.206	441.193
ATP1A3	Sodium/potassium-transporting ATPase subunit alpha-3;Isoform of P13637, Isoform 2 of Sodium/potassium-transporting ATPase subunit alpha-3;Isoform of P13637, Isoform 3 of Sodium/potassium-transporting ATPase subunit alpha-3	1.84672	0	0	0	0	0	0	0	2.53133	2.86881	0	0	0	2.87793	2.39123	4.0952	0
ATP1A4	Sodium/potassium-transporting ATPase subunit alpha-4	18.3232	17.93	21.3252	21.6873	18.2267	16.5134	20.5358	18.2583	16.2386	21.5775	14.6222	31.6591	14.1587	31.8919	10.9957	13.4609	37.3361
ATP1B1	Sodium/potassium-transporting ATPase subunit beta-1;Isoform of P05026, Isoform 2 of Sodium/potassium-transporting ATPase subunit beta-1	193.955	157.645	221.714	254.335	187.459	237.375	231.906	279.422	194.289	239.774	262.852	368.382	179.524	433.391	129.426	200.067	358.45
ATP1B2	Sodium/potassium-transporting ATPase subunit beta-2	4.39644	2.4529	2.67481	3.70174	3.03464	4.73299	2.97517	1.88304	0	2.71582	3.802	3.38921	2.59611	2.40149	0	1.93364	1.82528
ATP1B3	Sodium/potassium-transporting ATPase subunit beta-3	9.19392	8.53649	18.4032	12.5258	11.7627	9.04348	14.4083	10.439	10.7287	13.3383	12.6128	27.9125	18.9027	18.3434	16.4445	14.4702	24.1006
ATP1B4	Protein ATP1B4;Isoform of Q9UN42, Isoform B of Protein ATP1B4	4.74461	6.77297	3.82907	10.0764	6.83923	14.5156	9.79067	14.7286	11.1802	8.14895	18.6901	15.5059	9.70785	14.4105	3.17118	9.65551	12.1459
ATP23	Mitochondrial inner membrane protease ATP23 homolog	0.902611	1.07542	0	1.52162	0.700821	0.730863	2.40886	2.83831	1.54578	2.65461	1.81348	2.30355	1.21485	3.82191	0	1.60131	1.77023
ATP2A1	Sarcoplasmic/endoplasmic reticulum calcium ATPase 1	3828.25	3421.99	2722.66	4617.49	3476.22	3485.26	1653.91	4843.51	4571.39	2238.73	5690	5611.75	1658.53	3650.74	1642.18	2360.89	6783.11
ATP2A2	Sarcoplasmic/endoplasmic reticulum calcium ATPase 2	4945.39	4217.74	4412.59	5741.25	4454.58	9352.67	6934.45	9104.59	4134.74	4414.7	4448.48	8218.6	4533.39	11206.8	1518.17	3570.88	5644.54
ATP2A3	Sarcoplasmic/endoplasmic reticulum calcium ATPase 3;Isoform of Q93084, Isoform SERCA3B of Sarcoplasmic/endoplasmic reticulum calcium ATPase 3;Isoform of Q93084, Isoform SERCA3C of Sarcoplasmic/endoplasmic reticulum calcium ATPase 3;Isoform of Q93084, Isoform SERCA3G of Sarcoplasmic/endoplasmic reticulum calcium ATPase 3;Isoform of Q93084, Isoform SERCA3E of Sarcoplasmic/endoplasmic reticulum calc…	5.06059	4.66315	2.95184	6.62379	3.93647	3.41457	2.90009	4.37583	5.44689	3.14993	7.10742	6.34743	2.49588	5.41353	1.97661	3.95799	8.21351
ATP2B1	Isoform of P20020, Isoform D of Plasma membrane calcium-transporting ATPase 1;Isoform of P20020, Isoform C of Plasma membrane calcium-transporting ATPase 1	4.13524	3.70322	9.48403	5.0131	3.65012	3.33684	5.63653	2.75461	3.23034	4.49885	4.20061	10.9976	4.6873	9.1218	4.35934	3.31723	14.5723
ATP2B2	Isoform of Q01814, Isoform YA of Plasma membrane calcium-transporting ATPase 2;Isoform of Q01814, Isoform ZA of Plasma membrane calcium-transporting ATPase 2;Isoform of Q01814, Isoform XA of Plasma membrane calcium-transporting ATPase 2	0.443814	0.611476	0	0.737745	0.416013	0.434646	0.214839	0.635273	0.205186	0	0.789063	0.679201	0.178823	0.787373	0	0	0.948263
ATP2B2	Plasma membrane calcium-transporting ATPase 2	9.47983	9.81701	9.92186	10.8744	10.1463	8.71637	4.69259	11.3752	11.6211	6.59632	17.3665	15.1879	5.08187	13.1244	5.70061	6.73403	20.6694
ATP2B3	Plasma membrane calcium-transporting ATPase 3;Isoform of Q16720, Isoform ZB of Plasma membrane calcium-transporting ATPase 3	1.81134	2.94428	0	5.69254	3.28857	2.35416	2.65713	0	3.84281	0	3.43488	4.87639	0	2.96675	0	2.98315	5.12777
ATP2B4	Isoform of P23634, Isoform XA of Plasma membrane calcium-transporting ATPase 4;Isoform of P23634, Isoform ZA of Plasma membrane calcium-transporting ATPase 4;Isoform of P23634, Isoform XK of Plasma membrane calcium-transporting ATPase 4;Isoform of P23634, Isoform ZK of Plasma membrane calcium-transporting ATPase 4	0.807236	0	1.05631	1.76322	0.773227	0.521958	0.663762	0.749826	0.631755	0.477531	1.27765	1.35831	0.907451	1.6795	0.252535	0.651141	1.6004
ATP2B4	Plasma membrane calcium-transporting ATPase 4;Isoform of P23634, Isoform XB of Plasma membrane calcium-transporting ATPase 4;Isoform of P23634, Isoform ZB of Plasma membrane calcium-transporting ATPase 4;Isoform of P23634, Isoform ZD of Plasma membrane calcium-transporting ATPase 4	8.70564	8.8121	22.3405	17.4947	8.13592	6.32464	13.4095	6.70904	6.93503	11.3632	10.1745	24.6546	10.3401	22.0943	18.3578	8.8181	29.1762
ATP2C1	Calcium-transporting ATPase type 2C member 1;Isoform of P98194, Isoform 2 of Calcium-transporting ATPase type 2C member 1;Isoform of P98194, Isoform 3 of Calcium-transporting ATPase type 2C member 1;Isoform of P98194, Isoform 4 of Calcium-transporting ATPase type 2C member 1;Isoform of P98194, Isoform 5 of Calcium-transporting ATPase type 2C member 1;Isoform of P98194, Isoform 6 of Calcium-transp…	1.51356	1.59103	1.92883	1.72547	1.35054	2.42513	2.74671	2.0843	2.17795	2.01327	2.60503	4.20434	2.61772	3.36729	0.633317	2.29655	4.85656
ATP4A	Potassium-transporting ATPase alpha chain 1	11.9042	10.0018	16.8808	17.7994	12.0367	11.0697	15.0249	16.4082	25.1332	22.0243	11.4502	23.1152	12.3005	21.8112	12.8891	19.3497	26.4015
ATP5F1A	ATP synthase subunit alpha, mitochondrial	2535.13	1712.3	2146.81	2646.71	2215.68	3194.01	5108.72	2944.83	1874.34	2409.36	2402.22	3380.63	2660.25	3768.6	1239.43	2285.99	2902.21
ATP5F1B	ATP synthase subunit beta, mitochondrial	2604.96	2066.71	2694.59	3370.59	2449.67	3688.38	6077.32	3022.46	2461.78	3482.58	2858.99	4339.08	3423.92	5044.06	2177.31	3217.18	3643.58
ATP5F1C	Isoform of P36542, Isoform Heart of ATP synthase subunit gamma, mitochondrial	712.526	544.351	691.979	759.637	657.214	1089.02	1874.18	964.185	584.99	789.771	803.548	1296.28	1114.87	1497.2	340.503	710.354	1031.4
ATP5F1D	ATP synthase subunit delta, mitochondrial	82.414	65.7627	95.1466	130.8	62.8068	108.302	196.296	87.6316	88.3382	127.821	50.2241	287.341	268.858	298.044	145.218	74.2293	298.971
ATP5F1E	ATP synthase subunit epsilon, mitochondrial	137.436	104.419	159.438	171.359	139.446	171.094	313.626	167.865	130.181	180.095	135.024	167.378	148.089	208.152	104.549	128.758	151.157
ATP5IF1	ATPase inhibitor, mitochondrial	186.595	158.737	174.982	142.202	149.247	246.681	310.179	199.692	67.7873	100.601	137.029	270.084	107.084	243.826	67.1461	111.218	106.765
ATP5MC1	ATP synthase F(0) complex subunit C1, mitochondrial;ATP synthase F(0) complex subunit C3, mitochondrial;ATP synthase F(0) complex subunit C2, mitochondrial;Isoform of Q06055, Isoform 2 of ATP synthase F(0) complex subunit C2, mitochondrial;Isoform of Q06055, Isoform 3 of ATP synthase F(0) complex subunit C2, mitochondrial	78.977	68.0894	90.9899	88.4314	52.2766	109.153	205.028	88.3203	7.52573	13.4092	82.3781	94.8851	117.794	160.059	6.88527	9.85542	106.765
ATP5ME	ATP synthase subunit e, mitochondrial	345.701	181.084	301.782	313.983	313.55	533.993	865.191	741.414	177.889	339.47	363.925	429.633	479.649	902.777	213.954	326.644	275.568
ATP5MF	Isoform of P56134, Isoform 2 of ATP synthase subunit f, mitochondrial;Isoform of P56134, Isoform 4 of ATP synthase subunit f, mitochondrial	777.68	629.186	979.024	936.281	822.824	2327.21	2431.71	2251.44	1738.8	4228.65	911.826	1282.62	1434.91	1954.25	1421.74	2705.05	950.887
ATP5MG	ATP synthase subunit g, mitochondrial	5513.16	2705.08	4530.99	5921.15	4601.58	11197.9	12482.8	9846.02	2536	3920.14	5080.56	5676.73	10537.2	9767.43	2225.47	2856.11	3855.93
ATP5MJ	ATP synthase subunit ATP5MJ, mitochondrial	1675.72	903.815	1066.82	1702.58	1646.67	3454.9	2686.04	4101.67	1281.88	1551.68	2915.49	1548.81	2099.54	3348.73	473.065	1380.94	1881.17
ATP5MK	ATP synthase membrane subunit K, mitochondrial	521.436	349.606	442.174	524.815	406.637	1113.36	1447.81	687.006	154.152	248.829	604.8	593.742	587.115	1077.66	147.069	218.462	430.853
ATP5PB	ATP synthase F(0) complex subunit B1, mitochondrial	1624.06	1260.03	1704.09	1645.53	1500.75	2108.8	3038.87	2388.14	1312.35	2099.91	1323.16	1703.33	2235.23	1908.01	894.584	1757.82	1573.36
ATP5PD	ATP synthase subunit d, mitochondrial	581.836	428.232	580.087	731.992	523.971	831.641	1438.84	834.95	463.926	618.303	655.408	1067.08	833.918	1313.95	387.455	646.212	885.378
ATP5PF	ATP synthase-coupling factor 6, mitochondrial;Isoform of P18859, Isoform 2 of ATP synthase-coupling factor 6, mitochondrial	96.672	56.0247	81.2818	111.149	68.2507	141.493	325.996	135.538	61.837	87.4181	76.6323	246.262	229.68	354.144	73.3029	84.4258	215.193
ATP5PO	ATP synthase subunit O, mitochondrial	710.396	580.069	617.864	729.804	686.131	1202.92	2089.84	1053.81	639.512	710.234	802.069	1168.15	955.263	1441.05	360.264	1101.98	859.466
ATP6V0A1	V-type proton ATPase 116 kDa subunit a 1;Isoform of Q93050, Isoform 2 of V-type proton ATPase 116 kDa subunit a 1;Isoform of Q93050, Isoform 3 of V-type proton ATPase 116 kDa subunit a 1	24.1046	19.9885	21.9429	21.106	16.4629	32.7971	37.2059	36.8435	26.3602	20.4598	35.1408	57.0687	42.0459	47.8058	20.1058	24.0035	61.1545
ATP6V0C	V-type proton ATPase 16 kDa proteolipid subunit c	12.6416	5.26962	12.0919	10.6196	9.50839	9.86361	10.0673	26.9687	3.53711	3.05212	22.7883	14.2298	16.2826	14.9927	2.49414	0	25.2888
ATP6V0D1	V-type proton ATPase subunit d 1	23.5614	19.7961	26.4785	28.0418	17.6688	24.5491	26.437	24.9437	23.1499	20.2956	28.0939	41.9564	34.8838	34.2437	14.9665	19.0974	45.5437
ATP6V1A	V-type proton ATPase catalytic subunit A	24.9632	23.5114	28.138	30.1791	23.1477	28.2186	33.0455	29.6661	32.3704	34.0645	36.8903	44.2892	30.791	43.3092	40.3015	34.1016	51.6451
ATP6V1B2	V-type proton ATPase subunit B, brain isoform	25.8345	22.4378	24.3105	30.6342	20.0728	28.8493	34.3884	28.344	25.5828	27.517	32.4199	42.2667	31.7924	44.9967	35.6715	24.6249	51.0539
ATP6V1C1	V-type proton ATPase subunit C 1	7.55267	6.29476	10.4567	10.2189	6.48495	9.86134	11.0716	7.72788	8.87051	8.9187	6.70212	16.9863	12.4458	10.2301	9.43889	5.63087	17.4996
ATP6V1D	V-type proton ATPase subunit D	11.0918	9.96734	11.893	12.9481	9.33914	9.34191	16.0329	12.6958	10.868	9.83561	13.0741	15.911	12.4458	15.9765	10.0258	9.56038	18.1063
ATP6V1E1	V-type proton ATPase subunit E 1	11.413	8.91003	9.66481	11.0105	8.33311	9.61249	14.0576	10.7414	11.2629	15.6459	11.5908	15.1355	10.6444	16.2922	16.0222	10.3723	19.5582
ATP6V1F	V-type proton ATPase subunit F;Isoform of Q16864, Isoform 2 of V-type proton ATPase subunit F	2.8327	3.14615	5.25162	4.20539	3.84067	4.24948	5.79045	4.53378	10.0126	9.53238	3.32439	6.25602	5.59916	5.75149	11.6365	8.0348	6.54077
ATP6V1G1	V-type proton ATPase subunit G 1	13.1341	10.2372	13.4027	10.0463	11.6441	11.0519	17.9892	18.7785	8.70861	12.1032	21.9438	16.0879	10.8324	18.8791	5.9091	18.4661	16.0742
ATP6V1G2	V-type proton ATPase subunit G 2	0	0.325222	0.467728	0	0	0	0	0.30162	0.574578	1.15798	0	1.24365	0.926239	0	1.90336	1.03128	0
ATP6V1H	V-type proton ATPase subunit H;Isoform of Q9UI12, Isoform 2 of V-type proton ATPase subunit H	44.8436	35.009	30.6192	34.6822	34.3247	19.1662	39.8027	24.8234	34.7335	32.9156	29.0076	31.9005	55.1853	51.818	33.7071	32.2163	49.4799
ATP7A	Copper-transporting ATPase 1;Isoform of Q04656, Isoform 1 of Copper-transporting ATPase 1;Isoform of Q04656, Isoform 2 of Copper-transporting ATPase 1;Isoform of Q04656, Isoform 5 of Copper-transporting ATPase 1	2.46491	2.22782	1.42657	2.72023	1.8604	3.05658	10.5199	1.57022	0	0	1.43421	2.85495	6.34196	4.84708	0	0	3.87729
ATP8A1	Phospholipid-transporting ATPase IA;Isoform of Q9Y2Q0, Isoform 2 of Phospholipid-transporting ATPase IA	4.25697	3.12809	3.78873	3.66781	2.64063	4.16136	3.67293	5.15063	3.87569	3.56699	4.89229	5.41375	4.05157	7.54016	3.65781	2.88519	6.27233
ATP9A	Probable phospholipid-transporting ATPase IIA	0	0	0	0	0	0	0	0	0	0	0	0.72979	0	0	0	0	0.533493
ATPAF1	ATP synthase mitochondrial F1 complex assembly factor 1	3.17688	4.0094	10.174	5.17853	3.87264	1.45257	6.00914	1.70907	2.3602	10.3515	2.07306	4.68164	4.14022	4.81371	9.58343	1.22145	10.1632
ATPAF2	ATP synthase mitochondrial F1 complex assembly factor 2	5.60274	8.16544	10.7893	14.3089	8.23013	9.43052	19.0683	9.13399	7.06234	12.6561	11.7223	13.6301	10.5347	15.9544	8.55305	7.60108	16.4183
ATRX	Transcriptional regulator ATRX;Isoform of P46100, Isoform 2 of Transcriptional regulator ATRX	0	0	0	0	0	0	0	0	0.548591	4.29934	0	0.726437	0.439464	0	0	0	0
ATXN1	Ataxin-1	0	0	0	0	0	0.996405	0	0.667976	0.397968	0.287476	0.610959	0	0.882111	1.02655	0	0.164428	0
ATXN10	Ataxin-10	6.1688	7.0223	13.8737	8.06318	4.958	4.00807	10.9197	3.43369	4.96305	8.68363	5.9513	13.2892	7.17502	13.0311	13.0684	7.70859	13.7572
ATXN2	Ataxin-2;Isoform of Q99700, Isoform 2 of Ataxin-2;Isoform of Q99700, Isoform 4 of Ataxin-2	6.22158	4.69764	7.95414	0	0	6.48389	8.85548	6.56388	11.2551	9.66499	5.70049	13.0556	6.78771	13.835	7.45626	10.553	11.3718
ATXN2L	Ataxin-2-like protein;Isoform of Q8WWM7, Isoform 2 of Ataxin-2-like protein;Isoform of Q8WWM7, Isoform 3 of Ataxin-2-like protein;Isoform of Q8WWM7, Isoform 4 of Ataxin-2-like protein;Isoform of Q8WWM7, Isoform 5 of Ataxin-2-like protein;Isoform of Q8WWM7, Isoform 6 of Ataxin-2-like protein;Isoform of Q8WWM7, Isoform 8 of Ataxin-2-like protein;Isoform of Q8WWM7, Isoform 9 of Ataxin-2-like protein	3.41508	5.46612	5.06749	1.94539	3.85041	5.53778	5.7758	7.64294	2.81157	4.15433	4.9421	11.4235	6.86631	6.61729	1.92097	2.69014	11.1514
ATXN3	Ataxin-3;Isoform of P54252, Isoform 1 of Ataxin-3;Isoform of P54252, Isoform 4 of Ataxin-3	1.11738	0.943364	1.05098	1.18442	0.816972	0.808976	1.1698	1.10831	1.09837	0.82471	1.84167	2.87407	2.96226	2.94361	1.75599	1.86928	3.51746
ATXN7L3B	Ataxin-7-like protein 3B	2.62181	1.26555	1.3861	2.63334	1.55492	0.945226	1.43553	1.3828	2.32514	1.99895	1.13374	2.54623	1.08149	1.42817	2.77345	0.383509	2.68862
AUH	Methylglutaconyl-CoA hydratase, mitochondrial	5.50555	0	11.617	16.4933	6.61008	7.63899	12.8001	6.75088	5.6124	12.4137	4.94324	18.5908	6.82847	14.8416	7.99505	9.72692	10.1025
AUP1	Lipid droplet-regulating VLDL assembly factor AUP1	2.54859	1.98052	1.61285	2.76571	1.94988	2.70356	3.61586	3.25507	5.06114	3.08533	3.41124	5.06755	3.67725	4.09336	3.37459	4.95878	5.78267
AVEN	Cell death regulator Aven	3.89584	2.07864	3.93001	2.07351	2.72212	3.96219	4.16785	5.59449	4.8837	4.86969	5.94172	5.64804	4.71762	5.14257	3.24057	6.99158	6.82541
AVL9	Late secretory pathway protein AVL9 homolog;Isoform of Q8NBF6, Isoform 2 of Late secretory pathway protein AVL9 homolog	0	0	0	2.61762	0	0	1.8703	0	0	0	0	1.34152	0	0	0	0	0
AZGP1	Zinc-alpha-2-glycoprotein	0	0	0.729782	0.521803	0.531627	0	1.09701	0.473217	0	0	0.308469	0.765065	0.965213	1.08388	0	0	1.49152
AZU1	Azurocidin	1.52792	1.77615	2.17317	1.69241	1.54635	1.45893	6.6193	2.1031	0	0	5.02588	3.72476	4.48459	9.86916	0	0	5.21709
B2M	Beta-2-microglobulin	4.07006	2.73955	5.60007	3.00889	4.2895	3.15018	6.5692	3.19419	3.28283	2.50439	5.14413	10.0786	6.00791	7.37361	4.10413	2.8726	11.8149
B3GALNT2	UDP-GalNAc:beta-1,3-N-acetylgalactosaminyltransferase 2	1.48765	1.33162	1.54915	1.33446	1.44147	1.69487	0	2.0006	2.03774	1.9566	1.6118	2.16171	1.10388	2.07148	0	1.89049	2.30903
B3GAT3	Galactosylgalactosylxylosylprotein 3-beta-glucuronosyltransferase 3;Isoform of O94766, Isoform 2 of Galactosylgalactosylxylosylprotein 3-beta-glucuronosyltransferase 3	0	0	0	0	0	0	0	2.08047	4.35661	3.70938	0	6.13618	5.57857	0	0	5.56769	1.60964
B3GLCT	Beta-1,3-glucosyltransferase	2.56981	1.73292	2.40709	1.77626	0	2.66585	0	1.73884	3.0182	2.07683	0.647906	0	3.00554	0	0	1.55194	2.88555
B4GALT1	Beta-1,4-galactosyltransferase 1;Isoform of P15291, Isoform Short of Beta-1,4-galactosyltransferase 1	13.3322	4.96112	8.25645	10.3922	7.95256	15.2945	6.29959	18.7396	13.8947	7.3249	15.9776	12.8647	17.1287	6.53552	3.22716	12.2483	8.39902
B4GAT1	Beta-1,4-glucuronyltransferase 1	0.610521	1.03438	0	0.829863	0	0.788199	1.37693	0.912558	1.01543	1.35926	1.28207	1.741	1.15884	2.01642	1.34841	1.02985	2.38467
BABAM1	BRISC and BRCA1-A complex member 1	12.2152	10.7914	12.592	15.8784	11.4632	12.4519	14.6458	16.0939	13.4199	12.7233	18.1056	20.6394	16.0407	23.8002	7.1849	11.9612	25.388
BABAM2	BRISC and BRCA1-A complex member 2	9.12012	7.89549	8.76381	9.16445	7.06166	9.79345	12.671	12.9259	12.6984	11.2824	13.2042	14.1383	11.8529	17.7574	5.76927	11.5951	17.7023
BAD	Bcl2-associated agonist of cell death	1.16789	1.17214	0.775342	0.298749	1.44879	1.32201	1.20009	1.41501	1.47078	1.4642	1.78489	2.35125	1.64106	1.76474	1.48635	1.53276	2.86701
BAG1	BAG family molecular chaperone regulator 1	5.02112	4.94287	7.28942	6.27923	4.87087	4.18635	7.36058	5.24881	4.76046	8.28326	5.59386	9.60059	5.81598	10.4805	8.7947	5.2357	10.9529
BAG2	BAG family molecular chaperone regulator 2	3.04089	2.76045	4.74016	4.59416	0	4.13272	3.51732	5.01604	3.97694	3.72564	7.83992	4.53417	3.85233	5.54856	3.03194	2.44836	6.02461
BAG3	BAG family molecular chaperone regulator 3	96.8503	67.9641	108.266	81.3779	46.463	91.5452	114.845	114.911	74.8426	101.485	106.075	90.0115	79.6936	152.82	71.6178	65.0692	147.411
BAG4	BAG family molecular chaperone regulator 4;Isoform of O95429, Isoform 2 of BAG family molecular chaperone regulator 4	0.263634	0.31505	0.582899	0.519166	0.475671	0	0	0.449428	0.496991	0.474134	0	0.814513	0.704568	1.14731	0.858857	0.473342	0.871623
BAG5	BAG family molecular chaperone regulator 5;Isoform of Q9UL15, Isoform 2 of BAG family molecular chaperone regulator 5	3.69318	2.9146	4.64294	4.3975	2.4328	3.62023	6.41818	3.36946	2.44202	4.94085	3.11395	5.22394	5.47928	6.91004	4.93425	3.95344	8.46114
BAG6	Large proline-rich protein BAG6;Isoform of P46379, Isoform 2 of Large proline-rich protein BAG6;Isoform of P46379, Isoform 3 of Large proline-rich protein BAG6	5.80231	5.08955	4.29035	5.46269	7.15166	5.04354	7.74484	8.34758	9.91399	10.4376	7.579	8.6596	6.41982	6.8767	9.27729	8.8364	10.4647
BAK1	Isoform of Q16611, Isoform 2 of Bcl-2 homologous antagonist/killer	32.6513	16.2997	13.6834	17.3223	20.7829	68.855	37.3605	47.5292	39.7328	18.7716	70.1959	31.4773	31.2265	26.5204	9.05359	29.8796	17.1407
BANF1	Barrier-to-autointegration factor	324.34	206.481	172.7	152.653	174.746	306.786	214.839	303.222	168.713	146.623	204.038	232.273	519.186	160.28	23.3089	71.2484	374.221
BAP18	Chromatin complexes subunit BAP18;Isoform of Q8IXM2, Isoform 3 of Chromatin complexes subunit BAP18	0	0	6.66336	0	0	5.31417	0	0	4.55878	3.73165	3.00962	7.36034	0	0	0	0	0
BASP1	Brain acid soluble protein 1	0.538519	0.574618	0.368802	0.482955	0.596495	0.411752	0.741502	0.574726	0.8932	1.13449	0.349552	2.68905	1.4247	1.52258	1.61741	1.08661	3.06711
BAX	Apoptosis regulator BAX;Isoform of Q07812, Isoform Beta of Apoptosis regulator BAX;Isoform of Q07812, Isoform Epsilon of Apoptosis regulator BAX;Isoform of Q07812, Isoform Sigma of Apoptosis regulator BAX	16.5158	12.271	9.08224	12.6417	13.9768	12.0347	9.69644	11.3962	8.43818	9.80622	12.5693	13.7657	17.7469	8.13355	4.16027	10.5871	7.63007
BAZ1B	Tyrosine-protein kinase BAZ1B;Isoform of Q9UIG0, Isoform 2 of Tyrosine-protein kinase BAZ1B	4.75446	4.25774	4.35505	6.976	4.18126	5.05168	4.91035	4.85133	3.0814	3.58098	5.65864	4.89664	3.33828	3.86616	1.25754	2.13292	5.2207
BBX	HMG box transcription factor BBX;Isoform of Q8WY36, Isoform 2 of HMG box transcription factor BBX	0.299848	0.302816	0	0.175431	0.367881	0.462419	0.413249	0.681492	0.283301	0.250439	0.589267	0.654031	0.783471	0.514731	0	0.29983	0.905375
BCAM	Basal cell adhesion molecule	13.5052	13.9213	15.3283	17.62	10.7475	3.86844	13.9737	6.01119	10.8905	17.3421	4.62926	16.8732	12.724	26.4533	11.9983	8.11288	20.3812
BCAP29	B-cell receptor-associated protein 29	6.7858	5.60892	8.19583	8.6498	6.72987	8.83966	8.08374	9.48551	8.82975	7.04047	8.26441	14.3879	8.68007	13.7208	5.29689	8.8997	17.2675
BCAP31	B-cell receptor-associated protein 31;Isoform of P51572, Isoform 2 of B-cell receptor-associated protein 31	28.9268	31.1372	35.3096	26.3455	25.9542	53.9555	27.7148	33.3089	20.6656	27.1457	41.4106	44.2383	48.7891	43.7704	39.3026	24.3431	56.212
BCAR1	Breast cancer anti-estrogen resistance protein 1;Isoform of P56945, Isoform 2 of Breast cancer anti-estrogen resistance protein 1;Isoform of P56945, Isoform 3 of Breast cancer anti-estrogen resistance protein 1;Isoform of P56945, Isoform 5 of Breast cancer anti-estrogen resistance protein 1;Isoform of P56945, Isoform 6 of Breast cancer anti-estrogen resistance protein 1;Isoform of P56945, Isoform…	18.5995	15.7608	27.3082	26.0559	17.2031	16.7123	20.4839	22.1289	22.3125	21.2472	29.2423	31.7467	19.5219	33.0202	19.9858	20.8918	38.1091
BCAS3	Isoform of Q9H6U6, Isoform 5 of BCAS3 microtubule associated cell migration factor	3.73939	3.92536	3.0591	4.64736	3.96832	4.13462	6.12509	5.77644	5.08685	4.42896	5.22892	6.86433	8.28177	7.38211	3.29398	6.0796	7.03929
BCAT1	Branched-chain-amino-acid aminotransferase, cytosolic;Isoform of P54687, Isoform 3 of Branched-chain-amino-acid aminotransferase, cytosolic;Isoform of P54687, Isoform 4 of Branched-chain-amino-acid aminotransferase, cytosolic;Isoform of P54687, Isoform 5 of Branched-chain-amino-acid aminotransferase, cytosolic	0	0	0	0	0	0	0	0	0	0	0	0.246603	0.145554	0	0	0	0.926038
BCAT2	Branched-chain-amino-acid aminotransferase, mitochondrial	24.923	33.2567	35.8008	51.8569	37.2655	24.9882	38.3895	22.2004	15.1827	19.2842	23.8074	28.8335	14.2273	40.2143	7.1092	20.1872	26.25
BCCIP	BRCA2 and CDKN1A-interacting protein	5.21316	5.04057	7.09567	7.54755	6.11374	6.04973	7.46642	8.04008	5.6435	6.94067	9.62303	8.36755	8.37574	10.6263	4.88114	6.19406	8.43391
BCCIP	Isoform of Q9P287, Isoform 2 of BRCA2 and CDKN1A-interacting protein	1.42397	2.88655	3.33191	4.7578	2.82103	1.19436	2.52413	3.43052	2.05281	2.70272	3.8825	1.93151	3.01455	3.1281	1.72592	2.94832	3.14072
BCKDHA	2-oxoisovalerate dehydrogenase subunit alpha, mitochondrial	6.49981	6.08947	5.49153	8.59224	5.72014	10.6644	26.5163	7.53114	5.77629	11.8141	8.84732	14.3614	12.9546	13.5825	3.77677	7.00608	15.7228
BCKDHB	2-oxoisovalerate dehydrogenase subunit beta, mitochondrial	10.8918	8.19935	6.29351	12.2238	9.13286	15.5681	37.0947	9.33599	5.11268	12.5835	11.3635	19.1822	15.9817	18.0003	3.56058	6.84976	21.1948
BCKDK	[3-methyl-2-oxobutanoate dehydrogenase [lipoamide]] kinase, mitochondrial	2.24389	2.35819	2.2454	2.83208	2.67182	5.95437	11.187	6.45893	3.34926	4.4576	5.40271	10.1882	7.75752	7.42643	0.945194	4.74215	8.12697
BCL2	Apoptosis regulator Bcl-2	10.5245	6.61271	7.38402	11.5693	5.92935	9.47187	2.63155	9.9715	14.8918	15.1217	9.12036	10.7869	3.77071	12.5655	7.65457	7.60808	14.0614
BCL2L1	Bcl-2-like protein 1;Isoform of Q07817, Isoform Bcl-X(beta) of Bcl-2-like protein 1	4.66875	4.39824	4.73144	5.71355	3.08821	3.91143	5.48545	5.17202	5.55967	3.8833	4.08331	7.0226	3.67894	5.88681	3.99688	5.24657	7.2182
BCL2L13	Bcl-2-like protein 13	47.0653	39.1092	42.0429	62.8067	46.2601	59.7084	78.9427	73.8517	44.8486	52.9421	94.8226	79.4508	69.0754	97.1137	25.7645	54.2844	87.2225
BCLAF1	Bcl-2-associated transcription factor 1;Isoform of Q9NYF8, Isoform 2 of Bcl-2-associated transcription factor 1	0.932397	1.18489	2.02625	1.16227	0	2.51209	2.19691	3.87223	2.93933	0.746623	3.58932	2.27823	1.55569	2.00254	0	1.59652	1.57409
BCO2	Carotenoid-cleaving dioxygenase, mitochondrial;Isoform of Q9BYV7, Isoform 2 of Carotenoid-cleaving dioxygenase, mitochondrial;Isoform of Q9BYV7, Isoform 4 of Carotenoid-cleaving dioxygenase, mitochondrial	6.85805	6.03225	7.49882	8.33309	8.23013	10.4288	13.7947	5.52154	6.18228	0	10.4115	12.4365	5.70063	5.81943	4.96959	0	10.0862
BCS1L	Mitochondrial chaperone BCS1	16.5997	13.0611	21.9884	24.826	14.0348	13.997	25.253	17.2528	4.9357	11.0714	17.1914	32.1735	20.2686	21.5616	3.72324	13.6262	35.9939
BDH1	D-beta-hydroxybutyrate dehydrogenase, mitochondrial	30.325	42.5676	50.4886	81.9042	58.5069	78.1872	184.422	90.9412	24.1684	71.302	66.0103	84.4886	96.0557	135.794	16.1147	48.0923	61.9339
BDH2	Dehydrogenase/reductase SDR family member 6	6.00345	6.33548	14.9794	11.1611	8.67375	9.24987	10.0118	5.59578	8.61884	16.0288	8.68184	23.9882	11.1487	9.76069	17.4591	8.79175	24.3013
BECN1	Beclin-1	0.894954	0.539361	0.505584	0.82472	0.648346	1.01003	1.64593	2.0103	1.7324	0	2.10917	0	1.70303	1.82886	0.781306	1.57788	2.39513
BET1	BET1 homolog	7.57881	5.29273	4.78733	7.27288	7.22781	11.6128	6.14062	14.0884	7.17379	5.17013	18.2353	8.43914	8.43963	3.8555	1.71483	9.85315	5.72834
BGN	Biglycan	15.0765	12.2371	15.9769	9.84932	11.0562	14.8777	12.7413	10.8633	12.3523	23.5831	15.7366	33.8999	25.2245	27.276	11.3272	18.9136	37.1902
BICD1	Protein bicaudal D homolog 1;Isoform of Q96G01, Isoform 3 of Protein bicaudal D homolog 1;Isoform of Q96G01, Isoform 4 of Protein bicaudal D homolog 1	0	3.36573	2.4626	0	0	0	7.06337	6.36445	0	0	6.00637	0	0	7.20577	0	11.4071	0
BICD2	Protein bicaudal D homolog 2;Isoform of Q8TD16, Isoform 2 of Protein bicaudal D homolog 2	1.03896	1.20831	1.5624	1.85015	1.34992	1.59344	1.73745	2.82723	2.58552	1.87673	2.68233	2.16969	2.2178	3.1382	0	2.14375	3.6235
BID	BH3-interacting domain death agonist;Isoform of P55957, Isoform 2 of BH3-interacting domain death agonist	1.02518	1.3458	2.14335	1.74705	1.6282	0.787473	1.8785	0.675399	0.988209	1.27409	1.27559	3.7179	3.25254	3.244	2.62133	2.70007	3.79515
BIN1	Isoform of O00499, Isoform BIN1+12A of Myc box-dependent-interacting protein 1	983.107	754.188	734.502	872.18	578.505	1140.34	901.389	1100.93	1009.6	458.354	1405.76	1565.66	689.641	1324.59	614.499	710.354	1472.41
BIN2	Bridging integrator 2;Isoform of Q9UBW5, Isoform 2 of Bridging integrator 2;Isoform of Q9UBW5, Isoform 3 of Bridging integrator 2	0	0.495199	0	1.52443	0.692639	0	0.763681	0.681021	0.255593	0	0.982227	1.65767	0.96833	3.44731	0.714202	1.5441	2.26427
BIN3	Bridging integrator 3	6.28928	5.59344	7.94865	8.06689	4.45766	4.47029	5.81986	4.78697	0	3.11029	5.35565	0	14.1196	6.78079	0	0	18.9465
BIRC2	Baculoviral IAP repeat-containing protein 2;Isoform of Q13490, Isoform 2 of Baculoviral IAP repeat-containing protein 2	0.704857	0.732621	0.873561	1.00301	0.814717	0.907059	1.29126	1.21608	0.97308	0.984694	1.23456	1.65882	1.22468	1.68027	0.56198	0.968222	2.25543
BIRC6	Baculoviral IAP repeat-containing protein 6	1.26096	1.71783	1.44875	2.354	1.1706	1.05399	2.54984	1.1936	1.1753	1.27409	1.4639	3.18492	2.64255	2.85549	0	1.42421	3.52638
BLMH	Bleomycin hydrolase	2.17371	2.20333	2.74343	3.42378	1.37882	2.21736	2.13507	0	1.16694	3.08462	0	1.90238	0	1.93901	3.83903	0	5.25205
BLOC1S1	Biogenesis of lysosome-related organelles complex 1 subunit 1;Isoform of P78537, Isoform 2 of Biogenesis of lysosome-related organelles complex 1 subunit 1	11.2073	6.11617	5.87751	5.36051	9.0679	8.45543	9.85853	9.81207	13.0632	10.8543	13.3663	15.9367	12.2046	20.8008	3.00069	14.1571	16.6774
BLOC1S2	Biogenesis of lysosome-related organelles complex 1 subunit 2	2.38837	1.60539	1.21002	2.06256	1.19456	2.52311	3.35747	4.17889	3.58219	2.78292	4.42295	4.36313	3.2094	3.7289	1.55999	3.41016	6.09577
BLOC1S3	Biogenesis of lysosome-related organelles complex 1 subunit 3	0.536044	0.56115	0.478843	0.421217	0.413435	0.590794	1.02214	1.02344	0.900427	0.946458	1.08072	0.863969	1.26889	1.18381	0	1.42192	1.1642
BLOC1S6	Biogenesis of lysosome-related organelles complex 1 subunit 6	0.53003	0.508252	0.756472	0.520603	0.562091	0.46541	0.729982	0.942238	0.763394	0.576503	0.821887	1.21338	0.97864	0.773892	0	0.909233	1.25236
BLVRA	Biliverdin reductase A	15.9846	21.418	21.8219	30.5426	17.5149	8.62454	19.49	8.84221	14.1726	28.5365	12.6419	25.4623	16.1407	25.0427	48.9915	15.0687	45.8594
BLVRB	Flavin reductase (NADPH)	281.45	552.051	326.658	256.393	376.71	594.478	259.127	243.703	582.839	800.758	407.391	942.753	222.702	488.405	1467.64	537.867	1265.4
BMP2K	BMP-2-inducible protein kinase	0.75492	0.697075	0	1.03683	0.367796	0	1.06687	0.799946	0.664429	0.844892	0.550696	1.22405	0.802644	1.06802	0	1.10402	1.17768
BNIP1	Vesicle transport protein SEC20;Isoform of Q12981, Isoform 3 of Vesicle transport protein SEC20	4.12763	3.70663	3.81323	4.73376	4.07481	4.86896	6.22318	5.72349	6.10167	5.76503	5.35072	9.47105	5.37555	8.33068	0	5.62957	8.05246
BNIP2	Isoform of Q12982, Isoform 2 of BCL2/adenovirus E1B 19 kDa protein-interacting protein 2	1.66265	1.5925	3.21805	3.07756	2.4194	1.62831	2.15433	1.11548	0.584586	0.721276	2.58352	3.12247	3.25254	1.73053	0.301385	0.600724	4.15747
BNIP3	BCL2/adenovirus E1B 19 kDa protein-interacting protein 3	29.3765	32.2685	38.6806	31.1822	21.984	27.2983	43.9554	34.7745	26.0285	27.4601	33.9166	39.7647	27.4172	59.7421	15.7189	41.6174	39.3304
BNIP3L	BCL2/adenovirus E1B 19 kDa protein-interacting protein 3-like;Isoform of O60238, Isoform 2 of BCL2/adenovirus E1B 19 kDa protein-interacting protein 3-like	0.356616	0	0	0	0.325617	0.610149	0.581182	0.497921	0.529113	0.434612	0.255748	0.867957	0.633612	0	0	0.598102	0.853746
BOLA1	BolA-like protein 1	1.69903	1.15287	1.91114	0	1.4332	0	0	0	2.1323	3.72908	0	1.4471	1.21597	2.20029	1.81769	1.52783	0
BOLA2B	BolA-like protein 2	17.4583	14.9444	27.3901	27.6189	18.7632	7.35759	20.0869	9.70198	15.5937	27.5234	10.8871	23.0355	15.6431	26.4107	45.4382	13.9404	30.7559
BOLA3	BolA-like protein 3	3.05915	3.36263	6.17864	7.11551	4.01982	3.21837	8.56273	3.7867	2.90502	3.08746	3.69668	8.34061	5.60561	8.47189	3.55485	4.60124	9.00386
BOP1	Ribosome biogenesis protein BOP1;Isoform of Q14137, Isoform 2 of Ribosome biogenesis protein BOP1	0	0	3.12675	0	0	0.702321	0	0.647531	0	0	2.01007	1.79266	1.29337	0	0	0	1.34409
BORCS5	BLOC-1-related complex subunit 5	2.99227	2.63014	3.38449	3.25691	2.69158	3.46686	4.06455	3.41398	4.39793	2.95802	5.34333	6.71426	5.05619	5.23939	3.3475	3.27774	8.17765
BORCS6	BLOC-1-related complex subunit 6	4.38733	3.7556	2.40432	3.75238	3.3397	4.34546	4.80964	5.35255	4.36062	2.99021	6.67747	6.61147	6.04398	4.54549	2.05978	3.1223	6.1042
BORCS7	BLOC-1-related complex subunit 7	1.63118	1.18217	1.64776	1.87761	1.54742	1.33026	1.73825	1.54618	1.64797	1.01158	2.32227	3.5563	2.40449	2.21096	2.01753	0.44185	3.82498
BPGM	Bisphosphoglycerate mutase	4.52065	5.90309	7.44549	4.93863	3.95009	1.1996	2.94925	1.83341	2.21181	2.53806	2.06211	4.10486	2.4787	4.976	21.5735	2.11142	7.60727
BPHL	Isoform of Q86WA6, Isoform 2 of Valacyclovir hydrolase	7.56312	11.6407	7.64176	17.4987	7.77691	5.48701	15.0561	4.13295	7.12277	9.23637	5.62486	9.14951	10.1467	5.15087	2.61108	5.92755	7.68296
BPI	Bactericidal permeability-increasing protein	0	0	0	1.53217	0	0	1.39255	0	0	0	0.778596	1.59514	1.39966	3.15486	1.29128	1.40856	0
BPNT1	3'(2'),5'-bisphosphate nucleotidase 1	8.2642	8.88136	13.1339	9.21523	9.14128	0.756721	4.28955	2.39917	5.27532	12.2603	3.48427	3.08673	3.21161	4.44918	24.69	2.49158	6.16636
BPNT2	Golgi-resident adenosine 3',5'-bisphosphate 3'-phosphatase	48.1505	29.4293	32.077	46.9036	35.9258	185.582	65.0148	147.354	63.7454	43.9442	185.358	95.2573	128.24	82.3342	26.0328	83.0759	75.7232
BRAF	Serine/threonine-protein kinase B-raf	0	0.257798	0.341502	0	0.346423	0.246227	0.367124	0.288045	4.89946	4.1976	0	0.916638	1.12726	1.10124	0	4.40023	0.797496
BRAP	BRCA1-associated protein	0	0	2.21969	0	0	0	0	0	2.13328	0	0	0	1.03902	0	0	0	0
BRAT1	BRCA1-associated ATM activator 1	0.455618	0.271443	0.393997	0	0.288076	0.401084	0.464528	0.407437	0.454515	0.420437	0	0.974761	0.725309	0.469873	0.342705	0.419832	0.711424
BRAWNIN	Protein BRAWNIN	35.1399	32.876	30.0741	36.8134	31.6816	40.4423	63.7694	55.6622	29.2381	28.314	40.6923	52.1793	31.5881	67.3877	21.8535	34.2354	43.9469
BRCC3	Lys-63-specific deubiquitinase BRCC36;Isoform of P46736, Isoform 1 of Lys-63-specific deubiquitinase BRCC36	10.2259	9.67118	9.94473	12.9421	8.54293	10.357	12.6886	11.7533	12.5126	10.7523	13.311	15.4917	11.4689	17.684	5.18109	10.8962	19.0077
BRD2	Bromodomain-containing protein 2;Isoform of P25440, Isoform 2 of Bromodomain-containing protein 2;Isoform of P25440, Isoform 3 of Bromodomain-containing protein 2;Isoform of P25440, Isoform 4 of Bromodomain-containing protein 2	0	0	0.955417	0	0	0	0	0	0	0	0	0	0	0	0	0	0
BRD3	Bromodomain-containing protein 3	1.60214	0	0	2.83796	0	0	0	0	0	0	0	1.95298	1.36623	0	0	0	0
BRD4	Bromodomain-containing protein 4	0	0	0	0	0	0	0	0	0	0	18.2437	0	0	0	0	0	0
BRD9	Bromodomain-containing protein 9	9.3778	1.96417	6.84846	3.67457	0	2.87234	5.64173	9.31667	0	0	1.02191	5.07339	5.25198	4.06331	0	9.2571	0
BRI3	Isoform of O95415, Isoform 2 of Brain protein I3	0	0	1.79099	1.56425	1.88368	3.4557	0	0	0	0.954117	1.63197	4.92491	2.41503	2.16312	0	0	3.4469
BRI3BP	BRI3-binding protein	3.92374	2.42705	2.849	5.53486	4.16588	13.9841	6.76102	11.5361	2.59387	0	12.3059	5.55134	7.27316	5.6154	0	1.76106	4.64974
BRIX1	Ribosome biogenesis protein BRX1 homolog	0	0	0	0.818665	0	0	0	0	0	0	0	0	0	0	0	0	0
BRK1	Isoform of Q8WUW1, Isoform 2 of Protein BRICK1	0	0	0	0	0	0	0	0	3.39663	7.4046	0	0	0	0	5.35576	4.35286	0
BROX	BRO1 domain-containing protein BROX	11.1584	9.4881	13.3289	14.3882	9.78379	5.38438	8.96215	8.81375	9.68832	10.6611	13.5741	13.1401	4.54175	11.7187	9.23254	6.77759	19.7619
BSCL2	Isoform of Q96G97, Isoform 3 of Seipin	0	0.213589	0	0	0.256807	0	0	0.342342	0	0	0	0.57796	0.42201	0	0	0	0.359856
BSDC1	BSD domain-containing protein 1;Isoform of Q9NW68, Isoform 2 of BSD domain-containing protein 1	3.0325	3.23504	4.25788	5.79837	3.71114	3.04044	3.28256	4.58311	3.95684	3.47858	6.47458	4.92831	4.27487	4.69657	2.1514	3.38513	6.05381
BSG	Basigin;Isoform of P35613, Isoform 2 of Basigin	157.471	160.76	238.942	244.797	123.483	47.3954	117.142	75.2767	84.3235	220.547	37.7583	156.638	98.6559	278.92	135.307	42.8425	265.784
BST1	ADP-ribosyl cyclase/cyclic ADP-ribose hydrolase 2;Isoform of Q10588, Isoform 2 of ADP-ribosyl cyclase/cyclic ADP-ribose hydrolase 2	0	9.94671	14.5276	8.56656	3.8932	1.83838	0	1.29676	0	0	3.10464	4.79952	4.14308	7.20909	0	0	16.89
BST2	Bone marrow stromal antigen 2;Isoform of Q10589, Isoform 2 of Bone marrow stromal antigen 2	19.3509	18.0834	13.3504	19.436	14.9971	33.4993	8.22645	30.7228	14.2774	8.30618	26.4126	15.8124	13.7159	14.5171	2.00042	13.95	6.58307
BTBD1	BTB/POZ domain-containing protein 1;Isoform of Q9H0C5, Isoform 2 of BTB/POZ domain-containing protein 1	0.979266	0.794473	0.75265	1.69944	0.767197	1.1372	0	1.3774	0.650802	0	1.58238	1.99388	1.3738	1.7623	0.645685	0.734641	2.32771
BTD	Biotinidase;Isoform of P43251, Isoform 2 of Biotinidase;Isoform of P43251, Isoform 3 of Biotinidase;Isoform of P43251, Isoform 4 of Biotinidase	2.28087	4.42465	5.08854	3.74116	3.42064	1.20236	2.98272	1.83173	2.8252	3.49785	1.6118	3.21439	3.96756	5.11894	7.67752	2.87326	6.12532
BTF3	Transcription factor BTF3	11.0205	8.35371	11.3212	9.44944	8.25861	16.3544	20.4321	21.1817	7.91496	6.10522	21.6776	28.6746	18.515	26.8213	5.75203	6.44726	31.8514
BTF3L4	Transcription factor BTF3 homolog 4	6.59782	3.6862	4.69238	8.4724	3.84421	11.3249	11.1356	9.59534	2.31872	2.47287	11.437	20.5352	11.2466	17.8805	3.49479	2.35275	22.1426
BTN3A3	Butyrophilin subfamily 3 member A3;Isoform of O00478, Isoform 2 of Butyrophilin subfamily 3 member A3	3.20628	4.06518	7.54733	3.17107	5.2955	4.11089	5.51331	4.08	3.28434	3.8477	3.6359	9.3411	5.92138	7.41106	4.80088	3.13311	7.87098
BTNL9	Butyrophilin-like protein 9	0	0.915333	1.3655	1.60585	1.49419	1.45257	2.99856	1.52356	1.23324	0	1.1064	2.61576	1.74712	2.18817	0	0	1.37857
BUB3	Mitotic checkpoint protein BUB3;Isoform of O43684, Isoform 2 of Mitotic checkpoint protein BUB3	3.5975	3.1353	5.26251	4.98432	3.71712	4.621	6.41375	5.83661	5.06697	3.42453	6.46565	8.09279	3.30387	5.7277	4.08527	4.92578	6.51221
BVES	Blood vessel epicardial substance	1.71633	1.64505	0.989676	2.52061	1.50733	2.49882	2.59844	3.40534	3.4328	2.66196	3.61503	3.8994	3.89156	4.74985	1.59706	3.33024	5.2051
BYSL	Bystin	0	0	0	0	1.16414	0.355088	0.870988	0	0.805283	0.470654	0.56756	0.993798	0.37482	0	0.508067	0.434485	1.06177
BZW1	eIF5-mimic protein 2;Isoform of Q7L1Q6, Isoform 3 of eIF5-mimic protein 2;Isoform of Q7L1Q6, Isoform 4 of eIF5-mimic protein 2	15.2651	15.6307	17.2899	18.6083	18.4207	15.6616	18.3659	19.4205	17.2802	16.4551	21.3065	33.8141	24.5089	22.4481	13.7982	20.1176	27.7286
BZW2	eIF5-mimic protein 1	261.518	264.898	210.375	240.274	249.176	167.585	257.758	194.205	197.401	285.234	224.239	234.692	215.985	265.693	126.392	147.426	294.326
C11orf52	Uncharacterized protein C11orf52	0	0	0	0	0	0	0	0.334627	0	0	0	0	0.796019	0	0	0	0
C11orf54	Ester hydrolase C11orf54;Isoform of Q9H0W9, Isoform 2 of Ester hydrolase C11orf54	1.94985	2.1711	16.6607	4.02723	0	2.16838	0	2.15954	2.00516	1.86467	3.53274	4.50503	0	6.14441	1.74309	2.55021	4.00986
C11orf68	UPF0696 protein C11orf68;Isoform of Q9H3H3, Isoform 3 of UPF0696 protein C11orf68	17.1514	16.6333	25.9533	19.1076	16.3496	17.7925	18.8587	25.7787	19.7446	22.3976	24.3788	24.0325	19.1216	32.5222	21.1262	18.5385	27.5822
C11orf96	Uncharacterized protein C11orf96	2.60916	2.8568	5.68189	2.22181	2.76699	1.85924	5.07823	4.50257	0.702504	1.62893	3.79937	9.61387	5.98857	4.28727	1.22017	2.22114	4.9015
C12orf57	Protein C10	1.13214	0	1.10279	1.33877	1.49833	1.54823	1.40221	1.52427	0	0	2.27778	2.24026	1.6658	1.99609	0	0	0
C15orf61	Uncharacterized protein C15orf61	9.26618	5.09541	8.85305	7.42517	7.35541	16.4906	18.785	10.9941	0	6.17592	13.023	13.1582	15.4926	19.6101	0	8.80593	12.836
C16orf86	Uncharacterized protein C16orf86	0	0	0	0	0.200681	0	0.252995	0.231079	0.182284	0.248143	0.140027	0	0.241281	0	0.280041	0	0.239072
C17orf75	Protein Njmu-R1	1.29509	0.548503	1.07027	1.17005	0.705354	0.89833	1.97703	1.11573	1.27629	1.38516	1.39512	1.8302	1.61817	1.72179	1.46866	1.61389	1.754
C18orf32	UPF0729 protein C18orf32	27.5614	25.3442	15.0589	30.2417	23.1583	42.8386	27.385	53.4516	24.8742	21.2081	70.65	31.9962	30.7555	29.7153	11.054	30.3442	20.8271
C19orf12	Isoform of Q9NSK7, Isoform 1 of Protein C19orf12	2.4923	3.67096	0	5.01079	3.15288	2.68495	4.26003	0	0	6.35479	2.57165	4.71952	4.61661	5.49516	7.80586	2.62165	6.47633
C19orf25	UPF0449 protein C19orf25;Isoform of Q9UFG5, Isoform 2 of UPF0449 protein C19orf25	1.08668	0.850118	0	0.827192	1.30559	1.45156	1.27765	1.59647	1.43797	1.88496	1.6936	2.0077	1.71444	1.55339	0.73168	1.89006	2.14254
C19orf54	UPF0692 protein C19orf54;Isoform of Q5BKX5, Isoform 3 of UPF0692 protein C19orf54	0.945585	0.981701	1.68032	1.35085	1.44214	0	1.11048	0.922275	1.5465	2.04033	0.74116	0.781444	1.19901	1.72536	1.73628	0.246817	0.966115
C1GALT1	Glycoprotein-N-acetylgalactosamine 3-beta-galactosyltransferase 1;Isoform of Q9NS00, Isoform 2 of Glycoprotein-N-acetylgalactosamine 3-beta-galactosyltransferase 1	3.35738	1.92566	2.58222	0	1.61327	8.18155	3.42935	8.51845	4.85455	0	10.1301	6.15316	4.34633	6.48456	1.93562	4.15695	5.03186
C1GALT1C1	C1GALT1-specific chaperone 1	0	1.15048	0	0	0	3.78561	0	2.81359	0	0	4.64528	1.8724	3.04105	1.56128	0	0	0
C1orf122	Uncharacterized protein C1orf122	6.04228	4.53189	7.65408	7.49387	6.2188	4.79773	6.45375	4.23995	10.0265	14.5111	5.3421	6.8265	5.84283	0	0	0	11.4374
C1orf198	Uncharacterized protein C1orf198	1.42364	1.45305	1.88059	1.97836	1.23086	0.858689	1.71638	1.3445	1.34261	1.22068	1.3518	3.48416	3.18583	2.14477	1.37728	1.4594	2.80304
C1orf21	Uncharacterized protein C1orf21	0.987417	0.703039	1.05656	0.805205	0.629951	1.25324	1.60514	1.65486	1.43433	1.15293	1.49352	1.51704	1.62302	2.05769	0.797115	1.02536	1.66237
C1orf232	Uncharacterized protein C1orf232	2.50381	2.41757	0	2.16624	0	0	3.01101	1.59831	0	0	0	3.09527	2.09905	2.81372	0	0.997873	4.29862
C1orf50	Uncharacterized protein C1orf50	0.79305	1.86715	2.498	2.37195	1.6066	0.256233	2.22491	0	0.999421	3.87527	0	1.20392	1.94233	2.25414	3.29246	0	3.30087
C1orf52	UPF0690 protein C1orf52;Isoform of Q8N6N3, Isoform 2 of UPF0690 protein C1orf52	4.75555	6.41474	4.10765	3.26517	3.96924	2.16389	4.82739	6.55935	5.28383	4.01422	7.95815	2.60734	3.22347	7.26073	2.35191	5.11064	6.72247
C1QA	Complement C1q subcomponent subunit A	49.4539	30.2747	34.6731	26.4306	42.9346	63.964	58.3327	79.9209	198.723	129.212	58.279	45.53	94.9562	125.395	52.7134	170.285	55.3769
C1QB	Complement C1q subcomponent subunit B	84.5475	79.3559	63.7079	66.7738	76.2969	147.889	162.559	209.199	252.086	270.584	195.529	111.045	222.292	249.966	158.351	367.854	191.218
C1QBP	Complement component 1 Q subcomponent-binding protein, mitochondrial	217.671	225.361	228.714	361.332	194.898	299.32	467.318	345.43	222.458	268.659	467.21	527.106	363.516	618.558	143.721	292.264	528.48
C1QC	Complement C1q subcomponent subunit C	94.4715	100.573	81.3941	84.8411	92.5565	199.635	184.21	264.948	276.725	308.107	274.544	141.644	289.883	336.187	202.825	343.064	278.054
C1QTNF9	Complement C1q and tumor necrosis factor-related protein 9A	2.02023	1.77084	2.02858	3.31365	2.29724	0	1.00534	1.29915	0.543937	0.312465	0	2.2187	0.843186	0.999955	0	0	0
C1R	Complement C1r subcomponent	5.17608	5.43475	7.50919	8.07433	5.04321	2.533	9.94975	3.00304	5.91219	9.71184	3.43646	11.9508	8.86999	12.7962	14.1749	10.7319	14.9289
C1S	Complement C1s subcomponent	13.366	5.29151	5.28072	13.1313	5.61445	11.5994	18.924	11.3073	8.07697	15.1252	31.2833	16.6801	12.7328	25.7206	20.894	14.1246	24.2063
C22orf39	UPF0545 protein C22orf39	0	0.608106	0	0	0	0	0.678441	0.956667	0.695262	0	0.920687	0	0.61196	0.855422	0	1.61389	1.24775
C2CD2L	Phospholipid transfer protein C2CD2L;Isoform of O14523, Isoform 2 of Phospholipid transfer protein C2CD2L	0.178814	0.504754	0.778562	1.19731	0.350273	0.334685	0.8634	0.586625	0.414905	0.830427	0.89704	0.788675	0.56276	1.1243	0	0.978307	0.829715
C2CD5	Isoform of Q86YS7, Isoform 2 of C2 domain-containing protein 5;Isoform of Q86YS7, Isoform 3 of C2 domain-containing protein 5;Isoform of Q86YS7, Isoform 4 of C2 domain-containing protein 5;Isoform of Q86YS7, Isoform 5 of C2 domain-containing protein 5	0.694706	0.636619	1.01904	0.983572	0	0.453561	0.853124	0.432375	0	0.704533	0.446696	1.2263	0.756177	0.712821	0.763697	0	1.67737
C2orf69	Mitochondrial protein C2orf69	4.28155	4.63745	7.61716	6.80152	5.55913	5.32642	5.85885	1.52146	6.00964	8.80646	5.29312	8.87356	7.8185	3.23058	5.55931	4.70408	8.48846
C2orf88	Small membrane A-kinase anchor protein	3.67114	3.33411	4.69238	3.71284	3.95555	2.4617	4.86309	1.94698	2.96312	3.65933	2.06211	4.78518	3.88618	7.30433	2.05788	3.52107	6.58914
C3	Complement C3	97.2749	149.548	123.878	102.874	79.5622	51.8246	129.751	95.0519	166.705	149.693	220.756	74.2845	84.7858	129.205	130.323	226.973	120.484
C3orf33	Protein C3orf33	0.271332	0.191416	0	0.200635	0.299576	0.564463	0.52205	0.755719	0	0	0.603131	0.754915	0.381701	0.711181	0	0	0.480318
C3orf38	Uncharacterized protein C3orf38;Isoform of Q5JPI3, Isoform 2 of Uncharacterized protein C3orf38	1.38772	1.26818	1.66684	1.24683	1.2497	0.878488	1.12153	1.46339	1.66168	1.65692	1.21091	2.26985	1.67696	2.08536	2.14892	1.5627	2.12241
C4A	Isoform of P0C0L4, Complement C4-A;Isoform of P0C0L4, Complement C4-A	0	0	0	0	5.92116	0	0	7.61308	0	0	0	0	0	0	9.79086	0	0
C4A	Isoform of P0C0L4, Complement C4-A	1.07004	0	1.62927	0	0	1.12005	0	0	0	1.14157	1.85957	1.76644	1.21094	2.28129	2.05173	2.3098	2.63651
C4A	Complement C4-A	43.8027	64.2361	53.9254	44.1679	43.6322	24.9078	67.4236	61.6539	59.0267	104.088	124.111	54.0379	66.2404	147.836	102.405	202.943	86.682
C4B		0.871366	5.44101	3.97002	3.06553	3.65348	1.294	4.28659	2.58917	6.72278	10.7746	7.64561	3.34656	4.41696	12.2174	10.664	19.7095	6.04824
C4BPA	C4b-binding protein alpha chain	14.3417	14.0598	27.5799	17.4705	11.6281	7.27505	25.3228	11.6001	24.2297	23.8123	23.6381	24.3275	21.1994	47.1281	32.5927	43.5788	70.6202
C4BPB	C4b-binding protein beta chain;Isoform of P20851, Isoform 2 of C4b-binding protein beta chain	0	3.2039	3.68547	2.21874	3.14056	1.03857	4.46388	2.65498	3.82691	3.60414	4.65921	4.26971	4.79207	7.22571	3.55485	9.54498	11.6528
C4orf54	Uncharacterized protein C4orf54	0	0	8.37709	0	0.606327	1.88815	0	0	8.69859	11.1327	0.712216	1.22433	1.1506	0.996278	0	0	0.869018
C5	Complement C5	2.03705	4.42567	3.86005	2.66444	1.80263	1.08927	4.4138	1.5906	2.89834	2.6835	2.84716	3.78528	3.90053	7.23736	4.87328	4.16366	7.66706
C5orf22	UPF0489 protein C5orf22	1.25661	0.889773	1.11994	1.61922	0.783081	0.798428	0.836396	1.2655	0.737817	0.791957	1.43586	2.08304	1.91392	1.70012	0.501673	0	2.41729
C6	Complement component C6	2.37575	3.54878	3.95178	0	2.6098	0.977318	1.57802	1.84485	3.55589	3.88509	2.52065	3.56778	3.42313	7.73358	7.24137	5.69607	3.60852
C6orf120	UPF0669 protein C6orf120	0	6.66161	0	0	0	0	0	0	2.96858	3.89046	13.394	19.7423	0	0	2.41058	3.00175	0
C6orf136	Uncharacterized protein C6orf136;Isoform of Q5SQH8, Isoform 2 of Uncharacterized protein C6orf136;Isoform of Q5SQH8, Isoform 3 of Uncharacterized protein C6orf136;Isoform of Q5SQH8, Isoform 4 of Uncharacterized protein C6orf136	7.45076	6.11335	9.25962	9.24924	7.73583	8.37984	28.2821	12.0659	2.09676	5.19041	10.2852	16.6609	13.6152	23.91	3.76375	4.73342	11.8149
C6orf47	Uncharacterized protein C6orf47	2.71144	2.73514	2.11054	3.13839	3.21741	4.59977	7.39626	3.97888	5.1838	2.3774	5.37541	5.40627	4.14403	6.89891	2.13954	5.39977	4.89586
C7	Complement component C7	6.77019	7.85018	11.089	4.90124	5.15474	2.9467	5.79845	2.01958	7.99924	10.6439	7.89427	8.85927	9.59231	11.9614	26.9663	11.5951	21.3171
C7orf25	UPF0415 protein C7orf25;Isoform of Q9BPX7, Isoform 2 of UPF0415 protein C7orf25	1.42299	1.53702	2.47169	1.86426	1.25172	1.25382	1.19898	1.13412	1.69258	1.5592	1.67383	2.11445	1.62003	1.92478	1.53081	1.5797	2.61595
C7orf50	Uncharacterized protein C7orf50	0	0	0	0	0	0	0	0.53047	0	0	0	2.68286	0	0	0	0	0
C8A	Complement component C8 alpha chain	3.01162	3.56024	4.70753	3.86284	4.1372	0	4.54687	1.28576	4.22813	2.94579	0.744409	5.15582	3.54098	9.23805	8.61829	3.82186	8.78271
C8B	Complement component C8 beta chain	0	1.37651	3.68038	4.06636	1.96384	2.97876	3.15509	2.94212	2.42688	2.94782	4.84632	5.32106	2.68116	4.31301	4.89802	3.05545	5.8107
C8G	Complement component C8 gamma chain	1.37499	1.89836	2.32859	1.25547	1.4448	0	2.07736	0	2.36292	2.72585	0.271151	2.69214	1.35526	3.16505	5.03061	0.606841	4.82868
C8orf33	UPF0488 protein C8orf33;Isoform of Q9H7E9, Isoform 2 of UPF0488 protein C8orf33	0	0	0	0	0	0	0	0	0	0	0	0	1.62377	0	0	0	0
C8orf34	Uncharacterized protein C8orf34;Isoform of Q49A92, Isoform 3 of Uncharacterized protein C8orf34	30.1996	16.7718	16.4132	31.7107	0	22.2401	54.943	25.1629	0	0	0	31.4991	0	39.3442	20.8555	21.5712	33.9101
C8orf82	Isoform of Q6P1X6, Isoform 2 of UPF0598 protein C8orf82	4.50402	4.18292	6.16727	6.06326	4.21024	4.44873	8.64992	5.94375	3.21995	8.77206	4.70557	6.29648	7.75931	8.12794	4.53337	4.135	6.7753
C9	Complement component C9	3.88777	5.29882	7.58391	4.44228	3.35125	3.12418	6.28655	4.68447	3.21328	2.38397	6.43298	6.79826	9.25173	13.835	12.4085	5.82338	7.93101
C9orf40	Uncharacterized protein C9orf40	2.444	3.23206	3.22993	4.1496	3.87531	0.934621	4.92507	3.15109	4.91868	3.55878	5.59258	4.41365	4.27192	17.1664	11.5006	10.2229	5.60181
C9orf64	Queuosine salvage protein	7.39436	7.61867	12.4278	9.76801	6.22597	2.92776	6.29669	4.31977	4.98481	7.46279	5.3335	5.33947	3.93209	4.56436	6.87102	2.64287	7.34562
C9orf72	Guanine nucleotide exchange factor C9orf72	0	0	0	0	0	0.638022	0.668671	0.878336	0.418455	0	1.00026	1.03157	0.79492	0.679799	0	0.431296	0.980232
C9orf78	Telomere length and silencing protein 1 homolog	0.570691	0.681521	0.193951	0	0.412579	0	0.638428	0.745179	0.743958	1.21255	0.748535	0	1.40192	1.93322	0	0.760983	1.47479
CA1	Carbonic anhydrase 1	5.38271	8.51294	6.79349	4.16971	6.77496	3.50055	13.428	4.63725	7.44815	4.61213	11.4423	16.2554	11.0033	25.6378	14.1326	18.7402	16.3015
CA14	Carbonic anhydrase 14	7.95428	15.5303	15.6961	19.9162	10.7178	2.67692	8.86364	17.8386	2.57305	2.06254	10.1254	36.5341	17.5155	52.5146	5.71375	3.25518	28.3876
CA2	Carbonic anhydrase 2	44.9367	44.9862	49.5671	33.9005	37.1028	36.8753	68.3144	33.1254	33.8882	35.506	57.5058	63.5767	60.7468	71.069	48.042	40.0014	77.9164
CA3	Carbonic anhydrase 3	1168.16	1668.32	1836.93	1127.47	846.266	1685.53	1633.47	1240.11	1641.91	2432.21	1558.52	2153.27	1584.98	2151.69	2330.35	1507.56	2493.04
CA4	Carbonic anhydrase 4	9.00328	3.98914	8.21284	5.67814	8.35809	15.291	0	6.01535	0	0	6.37106	0	5.17992	1.51489	0	0	0
CA8	Carbonic anhydrase-related protein	2.34801	1.99517	3.73244	2.93431	2.05261	1.56472	2.7862	1.90441	2.71925	5.09333	2.75621	4.09353	3.0983	3.22835	5.17274	3.59563	4.35942
CAB39	Calcium-binding protein 39	21.6173	17.8928	23.496	20.9994	17.8405	12.7361	20.3148	20.5145	16.6513	22.269	19.2536	21.7469	12.2609	19.5335	18.8417	12.7666	26.4502
CAB39L	Calcium-binding protein 39-like	2.66379	4.99781	11.1043	3.74978	4.31526	4.82876	0	5.58934	9.22038	11.3397	2.48377	11.3109	6.12242	4.71933	11.7414	7.35657	7.25987
CACNA1A	Isoform of O00555, Isoform 4 of Voltage-dependent P/Q-type calcium channel subunit alpha-1A;Isoform of O00555, Isoform 6 of Voltage-dependent P/Q-type calcium channel subunit alpha-1A	1.48834	1.02584	1.06707	2.14193	0.953909	2.16389	2.58948	2.2473	0.138532	0	1.74266	2.66992	2.38904	2.42148	0	0	1.67544
CACNA1D	Isoform of Q01668, Isoform Beta-cell-type of Voltage-dependent L-type calcium channel subunit alpha-1D	0	1.00874	2.04641	0	0	0	1.07674	0	0	0	0	0	0	0	0	0	0
CACNA1E	Voltage-dependent R-type calcium channel subunit alpha-1E;Isoform of Q15878, Isoform 2 of Voltage-dependent R-type calcium channel subunit alpha-1E;Isoform of Q15878, Isoform 3 of Voltage-dependent R-type calcium channel subunit alpha-1E	2.39002	2.67842	3.32501	2.11937	0	0	3.02282	2.57312	1.2099	0	4.19867	3.40642	3.33061	0	0	0	6.07755
CACNA1S	Voltage-dependent L-type calcium channel subunit alpha-1S	33.2737	31.1587	35.5626	53.2361	33.8382	52.2921	40.9084	52.2469	31.092	26.681	42.3265	78.3968	26.8116	79.3013	12.3316	27.8532	71.5531
CACNA2D1	Voltage-dependent calcium channel subunit alpha-2/delta-1	85.3102	72.5069	92.7242	126.738	91.2235	19.4239	66.4373	21.304	115.465	93.9077	8.41612	135.331	52.4715	169.504	66.2554	15.4268	162.042
CACNB1	Isoform of Q02641, Isoform 2 of Voltage-dependent L-type calcium channel subunit beta-1	73.7906	58.3014	50.2103	80.7433	62.5471	138.082	78.237	167.248	124.925	55.7316	129.393	132.678	62.4487	135.014	26.4436	67.9321	133.884
CACNB3	Voltage-dependent L-type calcium channel subunit beta-3;Isoform of P54284, Isoform 2 of Voltage-dependent L-type calcium channel subunit beta-3;Isoform of P54284, Isoform 3 of Voltage-dependent L-type calcium channel subunit beta-3;Isoform of P54284, Isoform 4 of Voltage-dependent L-type calcium channel subunit beta-3;Isoform of P54284, Isoform 5 of Voltage-dependent L-type calcium channel subuni…	15.3851	13.8797	11.3918	16.9983	14.3353	20.9621	13.1647	22.7384	19.9549	13.5301	19.7021	25.2812	8.55309	22.345	13.7696	13.2122	24.1451
CACNG1	Voltage-dependent calcium channel gamma-1 subunit	124.94	114.757	117.623	165.427	116.549	98.7042	70.6663	132.239	88.5419	63.6211	163.122	174.3	78.582	197.916	58.24	54.1097	164.789
CACNG6	Voltage-dependent calcium channel gamma-6 subunit	17.2862	14.4537	12.9388	25.3925	15.1533	14.6702	15.4779	23.0388	17.348	12.1479	24.1497	26.2179	9.53505	37.3147	10.2452	17.9298	26.0393
CACUL1	CDK2-associated and cullin domain-containing protein 1	1.31826	1.06409	1.44475	0	0.912656	1.29609	1.64442	1.18894	1.24695	1.50453	1.94945	0	2.15191	1.88313	0.879672	1.44769	2.87163
CACYBP	Calcyclin-binding protein	9.98851	8.6712	9.73628	11.5586	10.3325	8.95645	9.21324	15.6121	7.01534	7.66305	14.8906	11.885	18.1812	7.93013	7.48206	5.87862	12.329
CAD	CAD protein	1.68229	1.27432	1.80881	1.63157	1.17113	1.14587	1.8811	1.1843	1.81572	0.935193	1.78613	4.41467	2.4747	2.24275	1.55891	1.87791	4.18918
CALCOCO1	Calcium-binding and coiled-coil domain-containing protein 1;Isoform of Q9P1Z2, Isoform 2 of Calcium-binding and coiled-coil domain-containing protein 1;Isoform of Q9P1Z2, Isoform 3 of Calcium-binding and coiled-coil domain-containing protein 1	1.41352	1.51036	1.27789	1.34495	1.25721	1.68436	2.31746	1.68679	1.42872	1.59221	1.54601	2.78034	2.3819	2.78792	1.02099	1.33867	2.52597
CALCOCO2	Calcium-binding and coiled-coil domain-containing protein 2;Isoform of Q13137, Isoform 3 of Calcium-binding and coiled-coil domain-containing protein 2;Isoform of Q13137, Isoform 4 of Calcium-binding and coiled-coil domain-containing protein 2	7.92685	6.70933	6.35175	10.323	7.19626	9.08523	9.41482	8.48712	8.6387	9.26619	10.654	13.2769	7.79872	13.0281	6.67915	7.33458	14.2669
CALCRL	Calcitonin gene-related peptide type 1 receptor	0.660543	0.643249	0.991958	0.986521	0.922586	0.939152	1.05102	1.08883	0.551377	0.626616	0.936509	1.68888	1.23601	1.39791	0	0.819927	1.35934
CALD1	Caldesmon	8.91663	6.40146	10.8092	7.53193	7.19129	6.22925	9.41699	7.72077	6.2654	7.64014	7.58424	18.7542	11.2363	10.9896	10.4597	9.78532	15.7228
CALHM5	Calcium homeostasis modulator protein 5	10.7201	6.51597	5.23472	7.09098	13.0259	20.6698	6.06753	11.7804	4.96534	8.39076	13.8743	8.54472	10.4261	13.2337	0	8.84454	7.27996
CALM2	Calmodulin-2	1113.27	1007.12	1215.05	1497.98	1052.71	972.603	1024.5	1045.35	1328.77	1105.1	1298.11	1907.21	1387.47	1513.84	1425.68	1220.32	2166.85
CALML6	Calmodulin-like protein 6	0	0.287594	0	1.14447	0	0	0	0	0.581499	0	0.668362	0	0	0	0	0	1.19352
CALR	Calreticulin	98.3786	89.9869	112.978	132.803	95.8974	96.3908	97.9969	114.251	103.145	104.424	144.648	185.994	152.133	153.986	71.3544	119.943	196.213
CALU	Calumenin;Isoform of O43852, Isoform 3 of Calumenin	62.8493	50.1972	82.1662	101.369	54.1261	53.9431	85.4304	51.8634	37.8224	85.8819	97.9066	97.0506	78.095	74.5384	30.6917	77.9247	121.795
CALU	Isoform of O43852, Isoform 8 of Calumenin	33.5275	25.9645	40.3082	48.7872	34.6025	42.9671	47.5568	43.5874	25.524	37.8967	87.8642	62.7766	45.8272	44.6252	10.0097	42.0122	79.0549
CAMK1	Calcium/calmodulin-dependent protein kinase type 1	1.54632	1.81084	2.79379	2.67305	1.51568	1.02834	2.40443	0.896315	1.44029	1.72306	1.21818	4.21792	3.28642	3.15486	2.76071	1.23787	3.51422
CAMK2A	Calcium/calmodulin-dependent protein kinase type II subunit alpha	260.076	104.491	88.8778	157.256	156.245	257.061	65.2397	202.237	93.6804	87.5591	114.475	169.902	108.573	164.695	28.9949	73.3627	91.7337
CAMK2A	Isoform of Q9UQM7, Isoform B of Calcium/calmodulin-dependent protein kinase type II subunit alpha	0.463554	0.442364	0.607006	0.598972	0.521083	1.03737	0.798569	1.86836	0.812547	0.662066	1.42171	1.70019	0.727484	2.39707	0.338237	0.480812	1.76615
CAMK2B	Calcium/calmodulin-dependent protein kinase type II subunit beta	72.8452	67.9641	80.6851	79.9478	57.8372	110.468	91.4981	145.131	109.483	76.0854	103.541	135.113	81.381	136.452	36.7893	84.3869	134.533
CAMK2D	Isoform of Q13557, Isoform Delta 9 of Calcium/calmodulin-dependent protein kinase type II subunit delta	52.0956	40.0755	57.8486	48.4849	40.4396	64.8389	69.6165	85.3416	71.8536	55.3225	59.1033	90.7607	80.246	93.6656	25.6815	61.147	95.5716
CAMK2G	Isoform of Q13555, Isoform 6 of Calcium/calmodulin-dependent protein kinase type II subunit gamma	38.7704	32.5971	31.9369	36.0833	25.1772	47.5265	34.6029	63.3958	33.6937	23.0569	50.4908	49.1019	24.5258	57.3958	9.67879	23.7069	62.0624
CAMKK1	Calcium/calmodulin-dependent protein kinase kinase 1	0	0.653099	0	0.860214	1.03064	0.799348	1.48803	0	0.619939	1.31948	0.876217	1.33998	0.926879	1.21361	0.580391	1.10605	1.17714
CAMKK2	Calcium/calmodulin-dependent protein kinase kinase 2;Isoform of Q96RR4, Isoform 2 of Calcium/calmodulin-dependent protein kinase kinase 2;Isoform of Q96RR4, Isoform 3 of Calcium/calmodulin-dependent protein kinase kinase 2;Isoform of Q96RR4, Isoform 4 of Calcium/calmodulin-dependent protein kinase kinase 2;Isoform of Q96RR4, Isoform 5 of Calcium/calmodulin-dependent protein kinase kinase 2;Isofor…	0.432614	0.646814	0.784862	0.355718	0.467958	0.572711	0.779313	0.614696	0.54897	1.34401	0	1.23111	0.987468	1.02348	1.08523	1.3819	1.18639
CAMLG	Guided entry of tail-anchored proteins factor CAMLG	1.11071	1.73252	2.48939	2.85566	1.70336	2.5202	4.2787	4.29596	2.68317	1.67148	3.4428	3.88864	3.49803	5.26842	1.73708	3.02117	3.71047
CAMSAP1	Calmodulin-regulated spectrin-associated protein 1;Isoform of Q5T5Y3, Isoform 3 of Calmodulin-regulated spectrin-associated protein 1	2.12374	1.00967	2.32163	1.61587	1.00394	1.59491	2.52937	2.93603	2.73999	1.44744	3.33436	4.16196	2.64438	2.61264	1.99858	2.01686	3.56393
CAND1	Cullin-associated NEDD8-dissociated protein 1	32.8398	34.047	32.5607	33.0526	26.002	26.9176	35.1166	33.4242	32.1995	28.158	40.8801	59.2786	42.2205	55.9475	32.4729	44.9237	59.9693
CAND2	Cullin-associated NEDD8-dissociated protein 2	111.301	106.14	85.6432	99.0618	119.428	122.952	144.348	153.448	195.952	142.693	131.526	177.296	144.252	183.434	90.0163	163.861	155.75
CANT1	Soluble calcium-activated nucleotidase 1;Isoform of Q8WVQ1, Isoform 3 of Soluble calcium-activated nucleotidase 1	3.52859	2.1716	2.75609	4.40054	4.22773	4.67451	3.08683	9.11089	3.15318	0	8.88202	4.46682	6.49566	5.99488	2.51664	6.94185	2.93446
CANX	Calnexin;Isoform of P27824, Isoform 2 of Calnexin	76.7363	75.7843	96.7148	115.746	92.7699	111.439	115.748	142.811	96.1056	84.0043	148.769	182.767	170.696	161.057	52.5558	101.596	187.21
CAP1	Isoform of Q01518, Isoform 2 of Adenylyl cyclase-associated protein 1	0	0	2.17267	0	0	0	0	0	0	2.11398	0	0	1.04598	0	0	0	0
CAP1	Adenylyl cyclase-associated protein 1	8.98051	8.98627	12.6268	10.9776	7.48181	7.3019	12.3314	6.78204	8.90325	11.0586	8.017	21.3943	12.3886	16.2435	17.6775	8.62532	26.2863
CAP2	Adenylyl cyclase-associated protein 2	69.1195	63.7352	80.0559	72.3613	52.0963	85.3367	84.9987	84.5397	95.1806	71.8458	95.4799	123.026	70.8962	99.6736	89.1089	67.3248	184.684
CAPN1	Calpain-1 catalytic subunit	164.097	146.717	147.704	169.358	149.11	177.148	193.336	238.759	244.37	210.427	211.403	259.955	155.964	313.098	169.754	211.045	283.745
CAPN2	Calpain-2 catalytic subunit	112.305	91.428	124.049	84.724	92.7485	100.887	127.559	116.027	128.543	171.673	133.417	157.579	163.502	148.792	84.5904	148.996	152.696
CAPN3	Calpain-3	21.301	27.9498	14.4508	53.408	20.1422	53.5964	38.0025	73.0568	55.6095	19.1779	63.6666	53.8639	24.9588	51.8896	17.7264	33.9997	49.2412
CAPN5	Calpain-5	1.56748	0	0	2.18679	1.19016	0	2.63034	3.7867	0	0	0	4.3321	3.01594	3.1281	0	3.28681	2.76776
CAPN7	Calpain-7	7.60328	6.96754	7.13827	3.79233	5.87905	5.98737	7.3015	6.32354	6.51701	6.4432	6.26343	7.38921	5.59659	6.0281	9.36744	3.89292	7.74156
CAPNS1	Calpain small subunit 1	176.076	164.96	230.724	208.644	176.647	139.616	213.163	159.133	253.892	294.104	129.304	325.985	277.347	289.921	253.934	240.367	294.462
CAPRIN1	Caprin-1;Isoform of Q14444, Isoform 2 of Caprin-1	2.84709	1.84961	1.88753	1.97472	1.34681	3.59117	3.11682	3.49189	3.68679	3.88599	3.96837	5.95934	3.13634	4.48932	1.00005	3.40781	6.94111
CAPZA1	F-actin-capping protein subunit alpha-1	5.56289	7.11999	10.7694	7.27288	4.89561	3.14077	5.71495	3.4543	6.22227	12.6736	4.31034	10.5608	9.89973	8.36143	23.4057	7.07905	17.5844
CAPZA2	F-actin-capping protein subunit alpha-2	27.3842	26.3135	35.2284	32.4643	24.0773	24.9825	40.3564	26.9253	38.7479	52.9665	23.5132	49.6819	38.1525	41.3886	56.4834	28.8453	59.9141
CAPZB	F-actin-capping protein subunit beta	4.7764	7.17925	9.02803	9.16656	5.74258	5.18246	7.90701	5.34885	7.97349	10.5658	8.09304	10.3228	8.96238	9.57592	13.2624	9.25497	12.2696
CAPZB	Isoform of P47756, Isoform 2 of F-actin-capping protein subunit beta	28.7012	29.1527	40.0491	36.6527	28.0225	23.8691	43.3623	26.4156	41.9323	60.5064	26.1645	54.5379	43.0946	48.5602	67.3629	33.8669	73.7953
CARD14	Caspase recruitment domain-containing protein 14	0	0	0	0	0	0	0	0	2.669	0	0	0	0	0	0	0	0
CARD16	Caspase recruitment domain-containing protein 16;Isoform of Q5EG05, Isoform 2 of Caspase recruitment domain-containing protein 16	0	0	0.435405	0.698886	0.515474	0	0.559644	0.314819	0.317504	0.346339	0.487317	1.39476	0.915426	0.739061	0.538172	0.412169	2.00414
CARD19	Isoform of Q96LW7, Isoform 2 of Caspase recruitment domain-containing protein 19	4.2034	3.20169	4.28344	5.88446	3.38538	6.49734	9.46482	6.23104	7.70812	10.4593	6.74236	8.91658	5.48811	13.6735	5.85492	9.75608	6.88064
CARD8	Caspase recruitment domain-containing protein 8;Isoform of Q9Y2G2, Isoform 4 of Caspase recruitment domain-containing protein 8	1.80801	2.27394	2.62176	3.05708	2.21517	1.73754	2.42165	2.3865	2.60345	3.05775	2.57699	2.3426	2.08989	3.54797	2.97386	2.0791	2.85844
CARHSP1	Calcium-regulated heat-stable protein 1	3.10528	2.93413	3.74967	3.7026	2.82232	2.24303	6.02715	2.60832	3.91876	4.9648	3.95104	5.88977	4.4815	6.35595	11.8337	5.33427	6.97475
CARM1	Histone-arginine methyltransferase CARM1;Isoform of Q86X55, Isoform 1 of Histone-arginine methyltransferase CARM1	6.06458	9.43364	15.8341	16.312	7.78049	8.62652	7.80211	4.80685	6.39659	9.55216	5.69	22.1003	6.62252	10.7221	37.2495	5.22968	24.5092
CARNMT1	Carnosine N-methyltransferase	0	0.16714	0	0.352457	0.14181	0	0.100464	0	0.122758	0	0	0.407285	0.108774	0	0.0777716	0	0.7541
CARS1	Isoform of P49589, Isoform 3 of Cysteine--tRNA ligase, cytoplasmic	2.34207	1.74856	2.04218	2.31103	1.53393	1.43132	2.93435	1.18157	3.80845	4.04019	1.73545	2.43219	1.79194	2.38496	6.25347	2.04821	4.38156
CARS2	Probable cysteine--tRNA ligase, mitochondrial	5.96487	3.98088	9.43611	8.07061	4.58255	5.54416	15.9556	6.6967	8.59308	17.8115	4.46182	11.148	7.76467	11.7457	7.80766	6.19976	8.16636
CASK	Peripheral plasma membrane protein CASK;Isoform of O14936, Isoform 3 of Peripheral plasma membrane protein CASK	1.93019	2.64411	2.4643	3.12397	2.2809	1.46769	2.17627	1.52954	5.09036	1.92709	1.73905	4.05133	1.84809	3.86083	0	2.19773	4.69384
CASKIN2	Caskin-2;Isoform of Q8WXE0, Isoform 2 of Caskin-2	0	14.384	26.3265	20.1886	13.7375	31.213	18.6085	29.3265	56.9179	26.7055	21.7727	53.0638	12.486	48.818	18.6475	40.5859	32.1239
CASP1	Caspase-1;Isoform of P29466, Isoform Beta of Caspase-1	1.02849	1.11373	1.78153	1.27734	0.89827	0.862057	1.46897	0	1.19963	2.62665	0	2.68719	1.46765	1.88921	3.41681	1.17808	3.99879
CASP10	Isoform of Q92851, Isoform D of Caspase-10	0	1.84111	2.51416	2.49635	1.61476	2.63837	2.27516	2.93063	2.97474	2.1424	2.42612	4.04947	2.57053	2.60604	0	1.58334	3.25034
CASP3	Caspase-3	1.65539	1.41801	4.53099	1.88802	1.4365	0	2.12575	0	1.75408	3.68469	0.909519	2.53337	3.75339	2.2876	5.29567	1.2861	4.41193
CASP5	Caspase-5;Isoform of P51878, Isoform 2 of Caspase-5;Isoform of P51878, Isoform 5 of Caspase-5;Isoform of P51878, Isoform 6 of Caspase-5	0	0	0	0.452591	0	0	0	0	0.522575	0.51737	0	0	0	0	0.813432	0.587456	0.644509
CASP6	Caspase-6	0	1.35512	1.92528	1.5585	0.992218	0.530806	1.22691	0.492902	0	0.878418	1.46897	2.51303	1.68897	0	1.51538	1.36074	2.44866
CASP7	Caspase-7;Isoform of P55210, Isoform Alpha' of Caspase-7	8.56053	6.49351	8.26786	9.14337	7.92696	3.89795	4.7034	4.01754	6.26251	8.23193	4.62074	9.41669	6.66689	8.24291	10.086	6.56561	8.92542
CASP8	Caspase-8;Isoform of Q14790, Isoform 2 of Caspase-8;Isoform of Q14790, Isoform 4 of Caspase-8;Isoform of Q14790, Isoform 9 of Caspase-8	0	0	0	0	0.339162	0.546683	0.960312	0	0	0	0.60036	0	1.10084	0	0	0	1.06225
CASP9	Caspase-9	2.10621	2.25621	5.9128	3.9674	2.72149	1.25527	3.18502	1.22733	1.482	1.95255	2.23981	2.71393	2.43963	3.26272	1.47816	0	3.57214
CASQ1	Calsequestrin-1	1477.07	1068.51	1093.18	1540.66	1226.33	2357.96	1933.36	2919.18	2816.75	1209.49	2830.17	2657.04	1598.54	1935.89	471.977	1809.57	2385.77
CASQ2	Calsequestrin-2	102.471	93.45	133.013	128.294	99.062	318.886	427.476	250.012	177.153	187.716	178.325	286.879	322.644	245.799	31.0257	247.044	122.019
CAST	Isoform of P20810, Calpastatin	0.280221	0.25863	0	0.193823	0.258706	0	0.422583	0.143107	1.16399	2.77652	0.815853	0.270457	0.54203	0.784297	3.22345	2.73322	0.984303
CAST	Isoform of P20810, Isoform 6 of Calpastatin	8.90227	12.1361	17.6479	13.6178	9.05747	12.0875	11.2515	9.15294	14.0265	20.054	8.54893	20.0123	10.7182	17.9713	20.6026	10.2536	28.1662
CASTOR2	Cytosolic arginine sensor for mTORC1 subunit 2	16.9083	14.1932	19.2927	21.7824	14.1321	14.7753	11.3217	11.6697	13.2084	20.2349	15.8166	18.8147	9.02658	20.1363	20.0826	11.3181	18.4344
CAT	Catalase	9.65163	6.00868	9.14309	15.693	8.73991	13.2537	10.4861	16.4915	5.19815	11.2928	26.5896	14.9968	15.2659	14.2489	7.19981	7.41609	10.5591
CAV1	Caveolin-1	85.3298	96.2009	114.602	89.8682	72.9133	70.8167	68.2044	66.9824	50.7982	54.4254	61.6186	117.138	76.4228	93.0423	27.9075	46.023	76.0727
CAV2	Caveolin-2	4.94312	5.59602	5.68059	4.46896	4.27964	4.36451	4.15827	5.3723	3.25124	3.32584	3.31751	7.59798	4.55327	5.82613	3.40033	4.25182	4.04789
CAV3	Caveolin-3	65.043	64.6963	50.4421	59.2388	39.0487	33.4069	37.9675	34.559	6.4647	7.08764	23.791	93.0461	41.345	79.7591	3.27658	5.71314	96.1454
CAVIN1	Caveolae-associated protein 1	130.708	125.366	141.904	121.424	88.7988	161.041	140.706	177.566	134.415	109.648	202.821	214.239	127.768	156.164	34.0817	136.262	167.776
CAVIN2	Caveolae-associated protein 2	25.1016	26.0963	33.6739	26.1641	23.2974	36.7143	31.7112	42.5658	30.942	20.7779	45.5105	31.3327	23.1485	33.0355	5.53759	27.2505	22.6115
CAVIN3	Caveolae-associated protein 3	11.1327	9.72029	13.4739	11.1252	9.05956	15.0951	15.4281	16.4536	11.093	10.6023	16.7422	31.1959	19.3519	13.3162	4.32435	20.5862	16.0077
CAVIN4	Caveolae-associated protein 4	98.8327	79.8876	79.9822	95.9856	53.9768	118.042	79.3071	143.668	114.195	87.7004	148.598	177.541	94.9343	140.081	21.253	91.9973	174.956
CBFB	Core-binding factor subunit beta	2.82293	4.77947	4.91466	3.59837	2.58052	3.09839	3.08398	2.58798	2.49143	3.76705	3.42068	5.01647	4.1193	4.43078	4.13163	0	5.19073
CBL	E3 ubiquitin-protein ligase CBL	0.32999	0.275283	0.623869	0.349709	0.333432	0.318226	0.630249	0.684165	0.474514	0.565329	0.399036	1.10204	0.992483	0.993529	0	0.45308	1.33915
CBLL1	E3 ubiquitin-protein ligase Hakai;Isoform of Q75N03, Isoform 2 of E3 ubiquitin-protein ligase Hakai	1.19042	1.21333	1.2246	1.43386	0.964955	1.26892	1.84549	2.44659	2.50005	1.31856	2.97243	2.44623	1.43623	2.48416	0.401625	1.60796	2.47873
CBR1	Carbonyl reductase [NADPH] 1	21.3501	18.2801	32.4633	35.7196	23.9611	22.4613	15.7729	17.8838	37.2262	46.1851	16.3611	44.4527	20.1615	29.6743	34.3575	27.6106	40.8252
CBR3	Carbonyl reductase [NADPH] 3	4.6903	5.47368	7.48158	7.8254	5.84799	5.13494	7.94351	3.59303	5.48717	9.25553	6.05079	12.8203	9.21347	7.82853	13.5838	4.06233	14.5321
CBR4	3-oxoacyl-[acyl-carrier-protein] reductase	24.8142	18.59	23.5772	42.9048	19.643	43.0265	31.9163	28.851	44.0199	34.0174	25.1022	30.6265	27.1346	27.2258	24.0337	33.4176	26.7503
CBX1	Chromobox protein homolog 1	11.2798	10.939	16.0988	14.6996	8.71579	8.27439	10.6221	13.4481	11.772	7.80911	13.5773	15.3461	12.7416	19.3678	6.64234	6.46808	13.4193
CBX3	Chromobox protein homolog 3	14.0346	13.39	19.4936	22.5427	11.8224	15.05	13.7503	15.6337	22.6438	16.2368	15.9262	27.4346	23.8574	26.3379	16.0961	11.2454	35.1908
CBX5	Chromobox protein homolog 5	2.38617	2.21962	2.59772	1.50316	1.83657	2.50055	3.31369	3.08007	2.55358	1.91294	2.9656	3.79051	3.49079	4.12459	2.65168	2.82537	3.21461
CC2D1A	Coiled-coil and C2 domain-containing protein 1A	3.51561	3.21647	3.39307	4.68928	2.68168	4.55026	4.33323	6.06262	5.08685	3.07045	6.46713	6.27333	4.60599	5.14376	2.88152	4.31494	8.33161
CC2D1B	Isoform of Q5T0F9, Isoform 2 of Coiled-coil and C2 domain-containing protein 1B	3.78966	4.27739	4.33105	4.55204	3.44355	4.7439	4.10121	7.02685	5.85394	4.58671	7.20795	6.53278	4.64112	6.39706	3.16462	5.42844	6.82227
CCAR1	Cell division cycle and apoptosis regulator protein 1;Isoform of Q8IX12, Isoform 2 of Cell division cycle and apoptosis regulator protein 1	0.718953	0.757494	0	0	0	1.94597	0.73116	2.59574	2.78836	0	2.77723	2.28454	0	3.10442	0	1.65149	2.08559
CCAR2	Cell cycle and apoptosis regulator protein 2	7.68601	7.75139	8.34436	8.94347	6.8235	15.0951	16.0958	22.3388	16.4304	9.7432	22.3209	19.1999	14.9184	20.0577	2.23471	14.537	19.6575
CCDC110	Coiled-coil domain-containing protein 110;Isoform of Q8TBZ0, Isoform 2 of Coiled-coil domain-containing protein 110	26.4485	31.6286	33.8137	30.8323	19.6158	12.0043	9.98877	8.96521	15.8836	16.0917	15.7874	17.8401	5.03875	7.6768	28.3218	7.19739	39.5393
CCDC115	Coiled-coil domain-containing protein 115	0	0	0	0	0	0.350135	0	0.842676	0.829944	0	0.509462	0.535671	1.06813	0.951657	0	0	0
CCDC12	Coiled-coil domain-containing protein 12	2.05637	1.88877	1.49449	2.54687	1.90856	1.60967	2.42221	3.22226	2.1865	0.440455	3.46587	2.54623	2.51434	4.56542	1.06126	1.84916	2.02735
CCDC124	Coiled-coil domain-containing protein 124	9.89238	7.59765	6.46239	6.91841	5.94439	8.70434	7.91794	8.71888	11.8809	3.58015	9.86534	13.2586	9.09124	15.5948	5.98303	7.03842	13.4626
CCDC127	Coiled-coil domain-containing protein 127	6.62675	5.68695	5.37271	7.54234	4.25115	7.21167	11.5375	7.47413	4.77693	10.3158	5.76384	10.9976	5.74279	12.3874	2.26528	10.49	8.97488
CCDC134	Coiled-coil domain-containing protein 134	2.24389	2.61685	0	3.25092	2.10478	2.45322	2.92356	4.49428	2.11032	1.98108	2.3416	1.94222	1.99997	3.26573	0	2.63315	1.47004
CCDC18	Coiled-coil domain-containing protein 18;Isoform of Q5T9S5, Isoform 2 of Coiled-coil domain-containing protein 18	4.25893	4.73674	9.09689	5.83319	0	0	5.04211	0	0	0	0	0	6.20045	5.15918	7.45626	3.75383	9.12912
CCDC22	Coiled-coil domain-containing protein 22	3.11746	2.69451	3.33038	3.97014	2.54453	2.46284	4.38543	2.79551	3.56737	4.07757	3.65521	5.79426	4.65611	3.84929	2.43176	3.53651	7.83481
CCDC25	Coiled-coil domain-containing protein 25	9.23211	9.55827	9.43829	11.9126	10.5927	9.27974	8.09491	10.5478	8.844	7.45936	10.9072	16.233	8.53735	15.8118	10.6297	7.89905	16.7159
CCDC28B	Coiled-coil domain-containing protein 28B	2.7695	1.79135	2.56208	1.74344	2.18076	1.62344	2.31746	3.46945	3.74411	3.50834	3.2818	2.24077	1.25263	3.85638	2.65535	2.68828	4.01263
CCDC39	Coiled-coil domain-containing protein 39	0.83234	0.428429	0	0	0.289806	0.388898	0.805216	0.506945	2.05281	2.11398	0.408425	0.514752	0.541531	0.821638	3.88616	1.94435	0.756012
CCDC40	Coiled-coil domain-containing protein 40	0	0	17.2026	0	11.5029	11.3432	14.5919	10.0221	10.6133	9.00952	11.3871	20.2068	15.0115	17.7779	7.23304	0	21.5739
CCDC43	Coiled-coil domain-containing protein 43	6.68653	6.96433	9.36684	8.60808	7.13357	3.95946	4.6314	5.46463	3.32697	2.80932	6.21029	6.53278	4.42103	8.08314	3.7977	3.08088	7.91642
CCDC47	PAT complex subunit CCDC47;Isoform of Q96A33, Isoform 2 of PAT complex subunit CCDC47	12.7058	13.7841	10.2139	13.5771	11.3372	18.2699	16.2934	22.6705	15.5042	8.35798	21.7276	28.2032	15.9083	27.0633	5.3991	16.7369	27.5568
CCDC50	Coiled-coil domain-containing protein 50	4.05416	4.26068	5.19748	5.81308	4.81512	2.6317	5.69	4.85244	4.25744	0	5.61451	7.45587	6.30846	6.36034	5.47673	5.65035	7.41359
CCDC51	Mitochondrial potassium channel	6.47442	4.98746	6.49371	7.60162	6.75938	8.03037	13.8935	7.15914	5.6787	8.28899	8.58642	14.615	10.8899	14.2719	4.06744	8.32674	13.4688
CCDC6	Coiled-coil domain-containing protein 6	6.24311	4.77727	7.02414	7.01627	5.60799	5.76947	6.09414	7.4415	9.05625	5.48405	9.56119	9.67159	9.05781	8.69522	5.6705	6.50542	12.1963
CCDC8	Coiled-coil domain-containing protein 8	0.0623018	0	0.135174	0	0.0844903	0.0917774	0.126099	0	0	0	0	0.250379	0.409188	0	0	0	0
CCDC88A	Girdin;Isoform of Q3V6T2, Isoform 2 of Girdin;Isoform of Q3V6T2, Isoform 3 of Girdin;Isoform of Q3V6T2, Isoform 4 of Girdin	0	0.635154	0.942309	0	0.594575	0	0	1.07192	0.924802	0	0.780031	1.59697	0.707658	1.1081	0	0.518173	1.34007
CCDC9	Coiled-coil domain-containing protein 9	3.97375	4.48311	4.48119	4.44331	4.27078	0	6.1265	6.93203	4.00819	0	6.25334	5.26863	4.95933	8.80603	6.44943	6.51741	5.65495
CCDC9	Isoform of Q9Y3X0, Coiled-coil domain-containing protein 9	2.65095	2.24688	3.2077	3.88961	2.80096	2.70979	4.08895	4.99184	4.8579	3.17396	7.07965	5.07689	4.33235	6.50699	3.48836	2.95376	6.64705
CCDC90B	Isoform of Q9GZT6, Coiled-coil domain-containing protein 90B, mitochondrial	2.61096	2.19624	5.43993	4.14578	2.46097	0.775775	2.09128	0.912348	1.47893	4.90458	0	2.62542	2.53235	4.44816	4.10035	0	3.55901
CCDC91	Coiled-coil domain-containing protein 91;Isoform of Q7Z6B0, Isoform 2 of Coiled-coil domain-containing protein 91	12.0393	9.32995	13.8482	17.1517	10.9448	13.8623	17.1479	14.5466	14.5763	11.259	15.6391	25.7038	23.0316	18.6372	10.4141	10.4972	24.7303
CCDC92	Coiled-coil domain-containing protein 92;Isoform of Q53HC0, Isoform 2 of Coiled-coil domain-containing protein 92	1.51078	1.56343	0	1.33477	2.30042	2.47649	3.89863	2.78074	3.10205	2.86221	3.31216	3.96185	3.41054	4.30012	3.07625	3.14539	4.60181
CCDC93	Coiled-coil domain-containing protein 93	2.37247	2.55376	2.81899	3.33354	2.39666	2.43913	4.09555	2.7616	3.76659	4.28353	4.27476	5.36906	4.65718	3.69301	3.06634	3.88039	7.60377
CCDC97	Coiled-coil domain-containing protein 97	3.05071	2.69885	2.92007	4.92273	3.4112	3.61024	2.11988	5.26212	5.77496	5.57829	6.14344	4.74022	3.01455	5.23336	2.47355	4.0792	5.90104
CCDC9B	Coiled-coil domain-containing protein 9B;Isoform of Q6ZUT6, Isoform 4 of Coiled-coil domain-containing protein 9B	3.05282	3.20612	3.71444	4.11724	3.67881	3.35843	5.4289	5.69719	3.96688	4.83394	5.38532	5.43874	3.9639	6.60511	0	3.6289	7.25151
CCM2	Cerebral cavernous malformations 2 protein	1.33629	1.15128	1.56709	1.78364	1.28797	0.964352	1.4116	1.41599	1.1294	1.30648	1.81014	2.88269	2.18889	2.06101	0.705214	1.12661	4.00248
CCN1	CCN family member 1	0	0	0	0	0	0.595711	0	0	0	0	0	0	1.05639	1.06336	0	0	0
CCNDBP1	Cyclin-D1-binding protein 1	3.05001	3.2967	3.9291	4.55099	2.87281	3.8268	3.2405	5.17083	4.67357	4.90458	7.04712	5.88028	4.86209	7.02717	5.28836	6.57015	5.89425
CCNY	Cyclin-Y;Isoform of Q8ND76, Isoform 3 of Cyclin-Y	1.78279	1.61503	2.30512	2.20855	1.66421	2.00418	2.01424	1.98591	2.12153	1.79639	2.21622	4.42281	2.76391	3.12666	2.04137	2.31353	3.27136
CCPG1	Isoform of Q9ULG6, Isoform 5 of Cell cycle progression protein 1	0	0	0	0	0	0	0	0	2.34773	0	0	3.16008	0	0	0	0	0
CCS	Copper chaperone for superoxide dismutase	15.4846	16.7101	31.1238	26.3516	15.3182	5.02268	17.5676	6.085	16.1194	30.8249	5.94719	22.5995	18.5235	29.6675	47.8543	13.5636	37.9602
CCSMST1	Protein CCSMST1	16.6572	11.7864	7.51957	14.9833	15.82	29.9113	24.4913	49.0637	19.9732	18.4757	22.7568	17.0294	20.7981	44.0738	6.30988	16.6792	10.376
CCT2	T-complex protein 1 subunit beta	43.0131	39.0373	46.7943	53.2729	34.6583	29.2103	61.4911	29.8305	58.1365	63.8854	29.6423	69.8229	55.44	70.7425	39.9596	47.1927	90.6627
CCT3	T-complex protein 1 subunit gamma	85.5462	78.5018	90.218	102.543	64.76	55.4416	124.226	62.0241	105.111	112.487	63.74	130.978	108.149	142.489	76.0363	100.548	186.564
CCT4	T-complex protein 1 subunit delta	122.829	108.537	125.92	143.849	88.6966	73.5929	171.085	78.2637	146.537	148.218	85.2142	185.994	154.747	201.41	100.235	124.731	252.19
CCT5	T-complex protein 1 subunit epsilon	51.9518	48.4149	55.1433	67.3917	40.7762	33.8482	69.6486	37.3646	62.28	64.789	41.0972	79.1951	64.9715	85.0904	47.7882	56.7512	106.863
CCT6A	T-complex protein 1 subunit zeta	53.9636	44.8208	56.963	62.8067	39.1387	34.6526	76.5618	39.2158	67.0268	69.1196	39.4377	85.0938	72.3308	92.062	47.0892	60.8801	117.525
CCT6B	T-complex protein 1 subunit zeta-2	5.86139	4.59599	5.99229	8.81873	7.53368	6.258	7.665	7.68176	8.2442	3.94822	10.6958	12.4997	8.47663	10.2348	21.4695	8.8181	11.7796
CCT7	T-complex protein 1 subunit eta	86.0797	78.2491	80.6293	117.871	94.4076	82.3258	107.13	89.4253	95.7963	118.933	102.426	91.3478	109.578	92.4869	105.906	115.658	108.675
CCT8	T-complex protein 1 subunit theta	99.6554	92.0194	108.167	130.049	83.4847	59.2701	121.175	62.2674	124.379	127.791	61.2226	149.141	116.687	156.704	100.768	99.4203	192.233
CCZ1	Vacuolar fusion protein CCZ1 homolog	2.43445	1.28848	1.0947	2.20956	1.80097	1.52418	2.099	1.54832	1.70431	2.39884	2.08791	1.86852	1.99675	2.14526	1.09149	2.23911	2.81922
CD109	CD109 antigen;Isoform of Q6YHK3, Isoform 4 of CD109 antigen	4.14955	5.37254	7.68056	5.32974	3.95282	2.61418	4.77433	3.23713	2.75771	3.99118	2.17476	8.51919	6.33466	5.87733	5.49441	2.30502	10.1421
CD14	Monocyte differentiation antigen CD14	3.90752	4.16082	5.84377	4.38638	3.25392	3.47165	5.47535	3.56912	3.07573	6.21014	2.57343	8.28129	6.00238	6.04478	8.34298	2.98727	9.86572
CD151	CD151 antigen	48.9216	37.7815	50.7333	40.4861	40.3373	46.3058	20.5169	55.0377	42.702	31.5792	87.1389	35.8507	42.7684	35.9899	10.3686	37.9818	33.3372
CD163	Isoform of Q86VB7, Isoform 4 of Scavenger receptor cysteine-rich type 1 protein M130	0	0	0	0	0	0	0	0	0	0	0	0.266623	0.394751	0.437905	0	0	0.769181
CD163	Scavenger receptor cysteine-rich type 1 protein M130	3.01718	2.72508	3.68462	3.59092	2.69344	1.75766	2.72591	1.98272	2.95426	5.94842	3.62086	8.46054	4.59011	3.85727	9.08283	4.9645	12.5525
CD209	CD209 antigen;Isoform of Q9NNX6, Isoform 2 of CD209 antigen;Isoform of Q9NNX6, Isoform 6 of CD209 antigen	1.90634	1.49996	2.65579	0	0	1.99681	4.41176	0	0	0	0	4.08788	1.94726	2.16063	0	0	2.00691
CD248	Endosialin	4.1735	3.95439	4.16767	5.03392	3.81862	3.14946	4.17938	4.05005	5.00667	7.35024	4.53745	11.0306	7.80051	5.52816	5.86167	8.23522	8.32585
CD276	CD276 antigen;Isoform of Q5ZPR3, Isoform 4 of CD276 antigen	1.92575	0	2.56799	0	0	1.74315	2.8511	0	0	0	0	7.61725	3.77071	3.34642	0	0	5.46423
CD2AP	CD2-associated protein	4.85625	4.46148	8.4585	5.33957	5.94712	4.39882	8.13602	4.49428	3.03283	3.89495	5.51077	10.3681	5.65227	9.15546	6.19043	4.42563	9.65448
CD2BP2	CD2 antigen cytoplasmic tail-binding protein 2	1.64854	1.18244	1.42854	2.28143	2.19587	2.09284	2.21979	2.83114	1.84735	2.32328	2.76383	3.22328	3.47635	3.23803	0.472956	1.66562	3.24585
CD300LG	CMRF35-like molecule 9	3.98108	4.21482	11.9369	9.21523	6.04654	6.38169	12.2015	7.13609	3.68764	5.77034	3.9556	12.8587	11.4084	12.7052	3.55485	3.95162	7.7202
CD34	Hematopoietic progenitor cell antigen CD34	10.5731	10.1573	18.9493	15.6281	10.3017	6.70403	11.771	7.66939	3.21254	6.9279	5.29312	27.1768	17.8905	16.7255	5.43152	4.66418	25.161
CD36	Platelet glycoprotein 4	237.083	240.813	169.158	344.196	280.548	467.774	222.491	581.648	137.42	141.124	737.415	200.031	249.071	209.016	25.6875	210.027	122.893
CD38	ADP-ribosyl cyclase/cyclic ADP-ribose hydrolase 1	59.0474	32.967	25.3918	51.1336	44.4741	133.179	27.7659	118.621	76.7271	33.1208	231.959	62.5458	27.6773	39.9375	12.4716	51.7696	65.5736
CD44	CD44 antigen;Isoform of P16070, Isoform 10 of CD44 antigen;Isoform of P16070, Isoform 11 of CD44 antigen;Isoform of P16070, Isoform 12 of CD44 antigen;Isoform of P16070, Isoform 13 of CD44 antigen;Isoform of P16070, Isoform 14 of CD44 antigen;Isoform of P16070, Isoform 16 of CD44 antigen;Isoform of P16070, Isoform 17 of CD44 antigen;Isoform of P16070, Isoform 18 of CD44 antigen;Isoform of P16070,…	9.8492	8.56405	15.999	11.8115	8.41215	6.65328	8.85956	7.33771	9.58183	10.7128	11.4766	27.7778	18.3495	15.1001	14.4784	16.9658	23.2771
CD46	Isoform of P15529, Isoform B of Membrane cofactor protein;Isoform of P15529, Isoform D of Membrane cofactor protein;Isoform of P15529, Isoform F of Membrane cofactor protein;Isoform of P15529, Isoform H of Membrane cofactor protein;Isoform of P15529, Isoform J of Membrane cofactor protein;Isoform of P15529, Isoform L of Membrane cofactor protein	8.15456	7.75139	9.77897	9.41903	7.01305	3.77429	7.45268	4.11018	9.21613	9.55656	4.18805	11.4868	8.51576	11.3548	6.97142	4.74106	14.1393
CD47	Leukocyte surface antigen CD47;Isoform of Q08722, Isoform OA3-293 of Leukocyte surface antigen CD47;Isoform of Q08722, Isoform OA3-305 of Leukocyte surface antigen CD47;Isoform of Q08722, Isoform OA3-312 of Leukocyte surface antigen CD47	4.35112	5.90173	3.62738	7.19294	4.72614	6.68091	3.71717	7.46037	3.4076	0	11.9732	5.50045	5.22665	7.24403	4.9229	7.69795	3.38555
CD55	Complement decay-accelerating factor;Isoform of P08174, Isoform 1 of Complement decay-accelerating factor;Isoform of P08174, Isoform 3 of Complement decay-accelerating factor;Isoform of P08174, Isoform 4 of Complement decay-accelerating factor;Isoform of P08174, Isoform 5 of Complement decay-accelerating factor;Isoform of P08174, Isoform 6 of Complement decay-accelerating factor;Isoform of P08174…	4.25697	3.50816	5.0245	6.40186	4.50201	1.32415	5.79845	2.02843	2.03212	5.43753	1.45617	6.96142	4.74049	8.79185	3.072	2.61623	7.90003
CD59	CD59 glycoprotein;Isoform of P13987, Isoform 2 of CD59 glycoprotein	96.6053	74.6241	68.17	93.6497	78.5972	125.498	49.8095	125.216	69.6384	57.6636	127.501	83.907	71.1907	35.3086	17.2871	97.1572	47.3292
CD5L	CD5 antigen-like	9.67834	10.0249	26.0431	13.6272	8.9827	2.14455	4.71533	5.63587	7.52746	9.2215	12.255	6.94861	4.77775	37.991	34.5956	14.2159	35.6721
CD74	Isoform of P04233, Isoform p35 of HLA class II histocompatibility antigen gamma chain;Isoform of P04233, Isoform p33 of HLA class II histocompatibility antigen gamma chain	2.74474	1.84153	5.07567	6.64823	3.28554	2.27633	4.3693	2.85931	3.12859	4.96708	3.43014	6.71117	6.51513	4.33991	7.0424	3.45283	8.35658
CD81	CD81 antigen	13.2191	10.8813	8.18452	7.7376	12.4683	13.6093	10.6319	15.895	11.5358	13.0227	17.4788	16.6455	20.6549	12.9802	8.55896	12.1668	9.44993
CD82	CD82 antigen;Isoform of P27701, Isoform 2 of CD82 antigen	1.61102	4.23233	2.48424	3.37758	4.14388	3.45809	1.59519	1.761	0	0	3.52949	2.71205	7.02139	2.06339	0	0	0
CD9	CD9 antigen	28.0802	21.731	33.4806	30.5989	27.772	36.9859	17.0221	37.2015	24.7827	22.4337	74.1331	32.3071	47.9759	24.8416	20.1382	21.6808	25.4759
CD93	Complement component C1q receptor	6.80144	5.16035	5.74107	8.56853	6.60704	5.28976	9.23873	7.95354	3.38492	2.69092	9.36293	12.1898	8.47273	13.0732	0	6.82614	14.6463
CD99	CD99 antigen;Isoform of P14209, Isoform 3 of CD99 antigen	4.29834	2.74587	9.0426	3.96558	3.20928	6.59228	9.13297	4.78807	6.2051	9.33257	7.86886	24.8999	17.0068	10.3343	10.1023	6.12174	21.4353
CD99L2	Isoform of Q8TCZ2, Isoform 3 of CD99 antigen-like protein 2	10.266	10.3939	12.9537	11.54	9.04288	6.8982	8.08932	10.3314	9.74874	7.99837	9.26642	12.9389	10.5785	13.1123	7.69522	8.59558	13.3116
CDA	Cytidine deaminase	0.263391	0.711016	0.389129	0	0.318865	0	0.57018	0	0	0	0.420061	3.63411	0.318583	2.07052	0	0	1.98166
CDC123	Cell division cycle protein 123 homolog	8.27944	8.12231	9.02595	11.2877	7.86877	6.35383	8.20941	8.10701	6.43797	7.93782	9.53261	9.64269	7.98037	12.6905	3.64436	7.81583	14.2965
CDC16	Cell division cycle protein 16 homolog;Isoform of Q13042, Isoform 2 of Cell division cycle protein 16 homolog;Isoform of Q13042, Isoform 3 of Cell division cycle protein 16 homolog;Isoform of Q13042, Isoform 4 of Cell division cycle protein 16 homolog	1.3119	1.77615	1.81883	1.75633	1.80388	1.36124	1.56824	2.56366	2.37984	1.83148	2.6657	2.5888	1.86133	2.28971	1.00143	2.23911	4.24745
CDC23	Cell division cycle protein 23 homolog	0	0	0	0	0	0	0	0	0.91569	0	0	0	0.567183	0	0	0	0
CDC34	Ubiquitin-conjugating enzyme E2 R1	12.4997	11.819	13.5174	14.7166	13.6901	10.9657	14.7643	12.9527	11.6882	12.1787	14.227	17.7991	15.1783	19.3099	10.7652	11.8625	20.4423
CDC37	Hsp90 co-chaperone Cdc37	65.509	69.0366	82.5835	95.3468	67.8121	54.618	83.4665	74.8446	62.1368	58.8574	90.0351	105.535	78.6001	133.931	66.2859	50.3356	124.977
CDC37L1	Hsp90 co-chaperone Cdc37-like 1	11.4868	10.6802	14.0247	13.5771	13.785	13.7131	14.6863	12.0687	13.85	11.9317	19.2935	22.1819	22.1831	16.154	9.34375	16.3974	23.2022
CDC40	Pre-mRNA-processing factor 17	0.341508	0	0	0	0	0	0	0.348627	0.240519	0	0.783992	0	0	0.519494	0	0	1.31652
CDC42	Cell division control protein 42 homolog	21.1885	20.7243	34.6253	27.4098	18.0471	10.991	21.8833	12.6113	22.0267	37.7834	13.518	30.9598	19.0381	25.7977	70.2783	14.3343	40.0155
CDC42BPA	Isoform of Q5VT25, Isoform 6 of Serine/threonine-protein kinase MRCK alpha	0	0	0	0	1.04018	0	0	1.19498	0	0	1.0955	2.13156	1.23317	0	1.33359	0	5.36573
CDC42BPB	Serine/threonine-protein kinase MRCK beta	0.869162	0.387596	0.497386	0.588446	0.548791	0.763195	1.0718	0.798658	0	0	0.919627	1.39187	1.08673	1.22908	0	0	1.02148
CDC42EP1	Cdc42 effector protein 1;Isoform of Q00587, Isoform 2 of Cdc42 effector protein 1	1.14948	1.85088	1.9815	2.63698	1.29929	1.64792	1.97976	1.76995	0.955539	1.15293	1.77301	3.28245	2.70224	1.68415	0.659661	1.52081	2.70912
CDC42EP4	Cdc42 effector protein 4	3.2233	3.75906	9.37547	6.81877	4.89787	3.97957	5.44894	5.35501	2.43024	2.27668	6.19886	9.71624	5.29814	9.00286	10.9451	3.78682	9.09554
CDC5L	Cell division cycle 5-like protein	0	0	0	0	0	16.0744	0	0	0	0	0	15.4205	0	0	0	0	18.6221
CDH11	Cadherin-11	0.595115	0.621555	0.718444	0.880656	0.785972	0.589706	0.758599	0	0	0.552079	0	1.52615	1.03353	1.05653	0	0	0.99341
CDH13	Cadherin-13;Isoform of P55290, Isoform 4 of Cadherin-13	239.277	201.177	220.746	206.446	142.432	132.049	118.553	164.157	176.339	179.474	125.375	253.745	127.24	321.722	121.54	157.317	234.384
CDH15	Cadherin-15	8.38303	8.3115	10.0622	8.56458	8.32927	9.44574	8.63202	11.8894	11.2137	11.5266	17.4507	14.3218	14.3954	13.1274	6.79236	11.4571	19.5852
CDH5	Cadherin-5	5.10153	6.318	8.26215	7.66137	4.07012	4.60613	7.23789	5.41702	5.77496	6.56147	5.57586	9.47759	6.61338	9.87826	7.59138	5.68166	14.3724
CDH6	Cadherin-6;Isoform of P55285, Isoform 2 of Cadherin-6	0	0.189531	0.493848	0.277464	0.233242	0.275002	0	0.451399	0	0.616597	0	0.762602	0.447119	0	0.609145	0.876749	0.6182
CDIPT	CDP-diacylglycerol--inositol 3-phosphatidyltransferase;Isoform of O14735, Isoform 3 of CDP-diacylglycerol--inositol 3-phosphatidyltransferase	12.1815	10.4684	13.6362	8.00767	10.1931	16.2793	15.1465	16.977	4.9562	6.62371	14.7881	24.8369	18.4979	21.6013	3.22419	4.99431	20.7601
CDK11A	Cyclin-dependent kinase 11A;Isoform of Q9UQ88, Isoform 4 of Cyclin-dependent kinase 11A;Isoform of Q9UQ88, Isoform SV1 of Cyclin-dependent kinase 11A;Isoform of Q9UQ88, Isoform SV2 of Cyclin-dependent kinase 11A;Isoform of Q9UQ88, Isoform SV3 of Cyclin-dependent kinase 11A	2.21208	2.80401	2.82288	2.54804	1.43783	2.77483	2.67678	4.2556	1.42642	0	2.82691	4.26087	2.90953	3.82279	0	1.53736	4.56592
CDK12	Cyclin-dependent kinase 12;Isoform of Q9NYV4, Isoform 2 of Cyclin-dependent kinase 12;Isoform of Q9NYV4, Isoform 3 of Cyclin-dependent kinase 12	0	0	0	0.529793	0	0	0.714846	0.618245	0.473968	2.45981	0	0	0	0	0	0	0
CDK16	Cyclin-dependent kinase 16;Isoform of Q00536, Isoform 2 of Cyclin-dependent kinase 16;Isoform of Q00536, Isoform 3 of Cyclin-dependent kinase 16	9.049	9.36654	8.16194	11.0257	8.0243	8.95439	11.5481	10.4921	8.56936	8.21299	10.0511	13.6835	10.3998	16.1503	5.82265	8.97377	12.7271
CDK2	Cyclin-dependent kinase 2	5.90746	5.81942	8.46824	5.60152	6.5782	4.83544	7.2063	7.60082	9.2907	8.0854	7.00022	10.5341	5.98306	12.3732	7.64929	9.17646	9.42603
CDK4	Cyclin-dependent kinase 4	1.71752	2.04446	3.39933	2.93634	2.03005	2.35362	3.93742	2.48005	2.37547	3.61494	2.33998	4.02067	2.8492	4.57383	2.97866	2.49503	3.74911
CDK5	Cyclin-dependent kinase 5	6.70194	8.63733	12.365	11.0435	9.23224	8.60668	10.4812	9.80078	10.0265	13.1523	11.943	19.3552	15.2589	17.7329	14.3953	10.4827	21.3958
CDK5RAP1	Mitochondrial tRNA methylthiotransferase CDK5RAP1;Isoform of Q96SZ6, Isoform 2 of Mitochondrial tRNA methylthiotransferase CDK5RAP1;Isoform of Q96SZ6, Isoform 3 of Mitochondrial tRNA methylthiotransferase CDK5RAP1;Isoform of Q96SZ6, Isoform 6 of Mitochondrial tRNA methylthiotransferase CDK5RAP1	0	0	0	0	0	0.0912086	0	0.171934	0	0	0.260143	0	0.336607	0.335877	0	0	0
CDK5RAP3	Isoform of Q96JB5, Isoform 4 of CDK5 regulatory subunit-associated protein 3	3.10814	2.58749	2.76945	2.66506	2.43392	4.25633	3.64512	4.54842	4.56929	4.06445	4.77103	6.07852	4.89016	5.31594	1.60295	4.02138	5.60181
CDKAL1	Threonylcarbamoyladenosine tRNA methylthiotransferase;Isoform of Q5VV42, Isoform 2 of Threonylcarbamoyladenosine tRNA methylthiotransferase	0	0	0	0	0	0	0	0.205003	0.429189	0	0.0608012	0	0.472088	0	0	0.0967108	0.370535
CDKN1B	Cyclin-dependent kinase inhibitor 1B	12.0227	11.9999	12.9596	12.7089	11.2722	9.96175	12.5867	19.7179	11.5891	8.3869	18.3955	14.74	10.3926	23.0877	9.81117	9.49457	13.5715
CDKN1C	Cyclin-dependent kinase inhibitor 1C;Isoform of P49918, Isoform Short of Cyclin-dependent kinase inhibitor 1C	0.951702	0.604476	1.12485	0.882483	0.941254	0	0.861415	0.723204	0.902503	1.00139	0	1.21366	0.979993	1.34425	0.786903	0.772458	0.824762
CDKN2AIP	CDKN2A-interacting protein	0	0	0	0.172984	0	0.229422	0.444337	0	0	0	0	0	0.280946	0	0	0	0.716686
CDKN2C	Cyclin-dependent kinase 4 inhibitor C	0	1.0636	0.924471	1.03563	0	0.47867	0	0	0	1.28204	0.739455	0	0.950218	1.25742	1.75275	1.89311	1.97983
CDNF	Cerebral dopamine neurotrophic factor	29.8814	35.6763	54.1992	32.3375	43.8942	42.5242	32.4573	45.0465	68.2729	66.2066	38.825	56.7281	44.3939	47.63	45.8375	43.1991	63.7718
CDS2	Phosphatidate cytidylyltransferase 2	3.83002	3.35799	3.95087	3.83271	3.91658	6.12542	5.3965	7.63415	2.95698	2.09605	5.52983	9.77908	6.96022	10.5945	1.73628	2.31673	8.02839
CDV3	Protein CDV3 homolog	13.1341	12.7785	17.5709	16.7728	13.8518	7.87655	10.1792	9.98759	16.7282	18.9061	11.2775	12.8232	9.60557	20.1688	22.3831	14.2881	16.1856
CEBPB	CCAAT/enhancer-binding protein beta;Isoform of P17676, Isoform 2 of CCAAT/enhancer-binding protein beta	0	0.775317	0	0	1.00625	1.13903	1.40285	1.38249	0	0	0	2.39165	1.54569	2.22833	0	0	1.47207
CEBPZOS	Protein CEBPZOS	60.2006	38.2895	46.8051	66.0399	70.7794	181.066	140.803	185.294	41.0628	54.0756	186.342	73.6882	99.8443	105.143	19.3785	72.2063	52.7629
CEFIP	Cardiac-enriched FHL2-interacting protein	1.16547	1.10555	1.41708	1.8353	1.14897	4.16328	3.22858	4.47055	2.25397	0.790317	4.78753	3.64836	2.62194	4.02884	0.773074	2.28863	3.73017
CELF1	Isoform of Q92879, Isoform 4 of CUGBP Elav-like family member 1	3.08888	3.24773	2.8536	3.93193	2.92016	5.88485	8.48032	6.36884	3.68085	2.73276	5.61063	6.25458	4.79428	6.58689	0	3.36647	6.9459
CENPV	Isoform of Q7Z7K6, Isoform 3 of Centromere protein V	11.285	0	0	0	0	0	0	0	0	1.63833	0	0	0	0	0	0	0
CEP170	Centrosomal protein of 170 kDa	1.17598	1.18271	0.977447	1.2665	0.662837	0.480326	2.16926	1.33401	1.27746	0.641507	1.24398	1.7108	1.3339	1.60243	0	0.896551	1.9428
CEP43	Centrosomal protein 43;Isoform of O95684, Isoform 2 of Centrosomal protein 43	0.79232	0.622844	0.637079	0.677495	0.71665	0.668399	0.913508	1.11163	0.965047	1.05804	1.15694	1.13187	0.779872	1.3182	0	0.830377	1.58245
CEP68	Centrosomal protein of 68 kDa	0	0	0	0	1.35708	0	0	0	0	2.51827	0	2.69897	0	0	0	0	0
CEP85	Centrosomal protein of 85 kDa;Isoform of Q6P2H3, Isoform 2 of Centrosomal protein of 85 kDa	0.308959	0.545606	0	0	0	0.473408	0.532859	0.710167	0	0	0.483517	0	0.614926	0	0	0.346318	1.03378
CEPT1	Choline/ethanolaminephosphotransferase 1	6.91354	6.10351	4.8887	5.8953	5.9732	7.69548	6.42114	9.63963	7.6533	5.75839	7.31159	9.9586	6.0412	10.0573	3.02776	7.23894	10.5494
CERS2	Ceramide synthase 2	10.8069	7.45383	6.20716	7.45944	10.1884	14.2868	12.6244	10.8084	4.98252	6.61457	12.874	13.3137	22.9998	6.90209	4.25423	5.22607	10.4095
CERT1	Ceramide transfer protein;Isoform of Q9Y5P4, Isoform 3 of Ceramide transfer protein	3.72907	3.4744	4.06063	5.38898	3.66612	4.35147	5.06655	6.36738	3.98335	3.39079	5.85075	6.70036	6.60272	7.76927	1.63727	4.49961	7.66529
CES2	Cocaine esterase;Isoform of O00748, Isoform 3 of Cocaine esterase	7.59628	6.06009	12.9806	7.44743	7.90873	5.34485	12.2776	4.05659	11.7233	19.8062	4.26297	19.1557	22.5384	12.4675	14.7306	6.91951	26.1956
CETN2	Centrin-2	1.28174	0	0.900934	0	0	0	0.741673	0.977374	0	1.98245	0.601329	1.11532	1.15831	1.00573	1.45419	1.79918	1.73912
CETP	Cholesteryl ester transfer protein;Isoform of P11597, Isoform 2 of Cholesteryl ester transfer protein	0	0	0	1.69983	0	0	0	0	0	0	2.73345	0	0	0	0	0.552682	0
CFAP20	Cilia- and flagella-associated protein 20	3.04369	1.54127	2.58103	2.30944	1.7535	2.3428	2.63216	2.62519	1.52985	3.54325	3.44677	5.16057	4.65397	3.25372	0	1.84024	4.79765
CFAP251	Cilia- and flagella-associated protein 251	0	1.52855	1.90719	1.04329	2.23258	1.32354	1.45483	0	0	1.22631	1.40868	1.32953	0	0	0	0.515199	0
CFAP298	Cilia- and flagella-associated protein 298	0.82357	0.590989	1.10025	1.31041	0.675316	0	0	1.8457	0	0	1.98204	1.78155	1.50738	1.48484	0	0	2.11509
CFAP36	Cilia- and flagella-associated protein 36	0.74302	0.724902	1.05607	1.48152	0.787602	0.844959	0.863798	1.17344	1.21604	1.80302	1.59005	1.57979	1.0915	1.47564	1.25291	1.03723	1.60261
CFAP410	Cilia- and flagella-associated protein 410;Isoform of O43822, Isoform Short of Cilia- and flagella-associated protein 410;Isoform of O43822, Isoform 3 of Cilia- and flagella-associated protein 410;Isoform of O43822, Isoform 4 of Cilia- and flagella-associated protein 410	0.352128	0	0	0	0	0.247649	0.770925	0.527061	0.43949	0.362244	0.770215	0.816767	0.574676	0.515918	0	0.380869	1.03331
CFB	Complement factor B	1.14051	2.46819	3.63072	2.45418	0.900756	1.38432	1.92714	0.687481	2.58314	3.683	1.2639	3.08886	2.66884	4.67391	60.4117	0.922306	9.38488
CFD	Complement factor D	0	0.354633	1.60692	0	1.36209	0.994342	1.28977	0	3.63537	3.46499	0.878642	1.4256	2.36441	3.90284	3.8461	3.33561	2.55758
CFDP1	Craniofacial development protein 1	1.89017	1.28819	1.15609	1.38168	0	1.98672	2.11988	2.78715	2.64941	1.75955	2.68295	2.97234	3.88618	5.34171	0	2.22933	4.39368
CFH	Isoform of P08603, Complement factor H	0	0	0	0	0	0	1.30621	0	0	1.48628	0.922597	2.52929	0.956364	0	3.31147	2.37561	2.54935
CFH	Complement factor H	8.66365	17.7329	18.9362	11.4079	8.79847	4.3887	10.9954	7.72255	11.409	16.615	14.8735	15.0729	19.263	23.8166	73.438	29.5376	36.8493
CFHR1	Complement factor H-related protein 1	1.94223	2.34628	2.14286	2.21976	2.01098	9.70143	8.34665	10.2721	12.5242	17.551	13.044	7.6436	7.98037	10.1014	15.3187	24.5344	9.68565
CFHR2	Complement factor H-related protein 2;Isoform of P36980, Isoform Short of Complement factor H-related protein 2	0	0	0	0	0	0.343349	0.346268	0.355108	0.783157	0.528447	0	0.278611	1.11051	1.62398	0.817563	0.537496	0.78276
CFHR4	Complement factor H-related protein 4;Isoform of Q92496, Isoform 2 of Complement factor H-related protein 4	0	0	0	0	0	0	0.19298	0	0	0	0	0	0	0.254554	0	0.357499	0
CFHR5	Complement factor H-related protein 5	0	1.2047	0	0	0	1.0948	1.54601	1.52427	1.25213	1.75672	2.22491	1.53992	1.54107	3.24474	1.91127	2.54844	2.25699
CFI	Complement factor I	1.63155	1.37873	1.57215	1.70297	1.33692	1.53157	1.72469	1.84527	1.66283	1.73781	1.91563	2.91607	1.38046	2.02479	0	1.27872	2.64807
CFL1	Cofilin-1	133.66	102.466	142.526	131.071	104.883	89.8744	121.987	111.137	103.526	134.277	141.225	156.098	106.887	106.287	105.225	73.312	166.774
CFL2	Cofilin-2;Isoform of Q9Y281, Isoform 3 of Cofilin-2	513.099	393.531	556.92	749.215	398.205	316.108	447.108	388.831	505.765	851.729	490.356	384.059	209.905	444.202	475.906	309.724	544.163
CFP	Properdin	6.07716	11.3183	5.26615	6.31112	6.83765	2.84208	6.18176	7.98106	10.863	12.0726	7.30991	6.74836	10.805	17.534	5.93774	14.2684	15.1855
CHAC2	Glutathione-specific gamma-glutamylcyclotransferase 2	0	1.62622	0	0	0	0	0	0	0	1.32008	0	0	0	2.2531	4.30845	0	3.48922
CHCHD1	Coiled-coil-helix-coiled-coil-helix domain-containing protein 1	1.96517	1.67178	1.57759	2.93634	1.29869	1.87774	7.1353	1.68718	1.74763	2.71082	3.52462	6.85327	2.83742	4.44406	1.43358	3.14684	5.55685
CHCHD10	Coiled-coil-helix-coiled-coil-helix domain-containing protein 10, mitochondrial	21.36	29.5379	25.5737	23.906	30.7615	23.5796	26.5713	18.4315	18.5374	46.8815	27.4228	17.7663	24.6504	23.3658	31.5153	16.8723	12.6803
CHCHD2	Coiled-coil-helix-coiled-coil-helix domain-containing protein 2	5.50175	7.53146	3.31736	2.71585	4.81401	4.05916	5.31511	4.1263	9.27361	6.60087	4.55839	3.2576	4.17372	7.24403	8.81294	4.09897	3.55246
CHCHD3	MICOS complex subunit MIC19	137.468	82.2204	105.122	123.114	102.049	177.229	280.551	157.965	115.199	150.004	138.233	248.541	177.224	249.621	45.5744	143.838	205.13
CHCHD4	Isoform of Q8N4Q1, Isoform 2 of Mitochondrial intermembrane space import and assembly protein 40	6.32122	6.04059	5.51687	9.90846	7.00498	9.02476	13.2529	10.0037	3.62784	5.2312	13.2774	13.0647	9.98213	16.5417	3.52388	4.97021	15.0705
CHCHD6	MICOS complex subunit MIC25	0.686279	0.384308	0.272768	0.660855	0.477207	0.551234	1.10742	0	0.859308	0.922574	0.673926	1.29538	1.06543	1.03677	0.347473	0.787182	1.17389
CHCHD7	Coiled-coil-helix-coiled-coil-helix domain-containing protein 7;Isoform of Q9BUK0, Isoform 2 of Coiled-coil-helix-coiled-coil-helix domain-containing protein 7;Isoform of Q9BUK0, Isoform 4 of Coiled-coil-helix-coiled-coil-helix domain-containing protein 7	2.60076	2.96537	3.08385	6.84867	2.78104	9.0936	13.1981	6.3425	3.02238	3.57274	6.18888	14.4144	5.4957	11.8326	0	1.42323	11.3639
CHD2	Chromodomain-helicase-DNA-binding protein 2;Isoform of O14647, Isoform 2 of Chromodomain-helicase-DNA-binding protein 2	0	0	0	0	0	2.90761	0	0	0	0	0	0	0	0	0	0	0
CHD4	Chromodomain-helicase-DNA-binding protein 4;Isoform of Q14839, Isoform 2 of Chromodomain-helicase-DNA-binding protein 4	0	0	0.300257	0	0	0.546054	0.391032	0.617107	1.61603	1.72584	1.27912	0	0	0	0.850787	1.15153	0
CHDH	Choline dehydrogenase, mitochondrial	2.53513	6.14157	2.62116	6.82034	4.63881	7.09963	5.90354	7.32421	4.61051	5.29787	6.7253	9.94943	8.01167	9.67565	3.44446	7.53659	12.1963
CHERP	Calcium homeostasis endoplasmic reticulum protein	1.10612	1.47734	0	0	0	2.06793	0.894772	3.25882	1.67552	1.07845	1.73425	1.98929	1.29397	2.62289	0	2.64104	3.0502
CHID1	Isoform of Q9BWS9, Isoform 2 of Chitinase domain-containing protein 1	0	0	0	0	0	1.32812	0	0	0.568655	0	1.34064	2.19482	0.799141	2.45799	0	0	0
CHKB	Choline/ethanolamine kinase	0	0.454652	0	0	0.701951	0.230269	0.48285	0	0	0	0.462181	1.16493	0.67924	0	0.850983	0	1.585
CHM	Rab proteins geranylgeranyltransferase component A 1	4.43405	3.57091	5.50165	6.49989	4.2054	3.647	5.45522	4.96319	4.55458	4.27564	6.32284	7.24933	5.17992	7.75855	4.0218	3.78334	8.72627
CHMP1A	Charged multivesicular body protein 1a	21.3698	22.9445	28.4573	37.4461	27.3279	17.7802	29.7517	27.8138	20.9773	27.1645	22.3878	33.9702	26.2557	33.0355	19.4009	21.826	33.2835
CHMP1B	Charged multivesicular body protein 1b	16.8152	13.5232	19.2306	19.3645	17.014	16.8747	13.5898	16.0015	19.1447	16.9864	23.228	20.7156	19.9997	23.4143	15.2659	20.2663	31.8367
CHMP2A	Charged multivesicular body protein 2a	11.1301	10.8712	16.0285	14.8973	12.1901	11.8942	13.2652	15.3943	13.1719	6.9695	17.6405	19.7924	14.69	18.6243	12.1485	14.2356	22.2756
CHMP2B	Charged multivesicular body protein 2b;Isoform of Q9UQN3, Isoform 2 of Charged multivesicular body protein 2b	2.52465	1.89968	5.01064	2.84909	1.88889	2.09573	3.34358	2.89108	3.73808	3.54325	3.66785	3.40563	2.71096	3.53005	9.51527	3.10939	3.68069
CHMP3	Charged multivesicular body protein 3	27.0459	24.0646	35.6774	37.7926	29.1882	21.9956	24.8035	27.2183	35.1357	39.6188	27.6256	29.655	19.3965	35.537	28.0751	30.4141	30.7772
CHMP4A	Charged multivesicular body protein 4a;Isoform of Q9BY43, Isoform 2 of Charged multivesicular body protein 4a	11.1584	10.3034	12.3707	12.8176	10.4883	5.87132	11.9237	8.75711	6.86513	8.47816	12.0868	14.8696	12.5436	19.737	9.08283	7.65024	17.8373
CHMP4B	Charged multivesicular body protein 4b	76.7363	59.2215	102.611	103.254	75.2154	48.3878	69.1691	56.8147	76.0762	96.3167	67.766	94.0152	66.992	100.18	76.5634	69.5465	106.421
CHMP5	Charged multivesicular body protein 5	14.8936	15.721	18.4967	19.4584	14.4913	14.8128	19.2891	17.8591	16.9726	19.6382	23.9338	28.3529	29.6977	30.2887	16.2825	20.7336	30.8126
CHMP6	Charged multivesicular body protein 6	22.5892	15.7572	34.221	27.74	21.3554	22.4872	32.5771	22.5403	38.0495	50.0382	29.0611	43.6715	28.8884	37.5388	19.3251	28.2927	53.2021
CHMP7	Charged multivesicular body protein 7	7.02588	7.04335	9.76097	11.4237	8.81266	7.39496	7.18641	9.03984	9.03959	9.59183	12.2099	11.8904	10.2029	10.8413	9.68325	7.8501	13.894
CHORDC1	Cysteine and histidine-rich domain-containing protein 1	10.1906	8.51686	10.4832	10.4763	8.03354	8.19286	10.9172	12.2281	10.5621	7.88136	10.6884	13.4183	12.6422	11.9448	7.63873	6.89089	13.1198
CHP1	Calcineurin B homologous protein 1	6.39736	6.81992	7.97247	9.00754	7.49216	8.05445	11.0132	9.00867	11.5013	15.8016	6.00222	12.9181	10.5129	12.876	10.8974	10.1129	13.9036
CHPT1	Cholinephosphotransferase 1	27.555	12.3703	21.592	22.7565	41.7645	41.4129	28.7748	44.5103	28.8834	22.4906	36.1253	23.426	34.4527	27.0695	4.43834	22.9285	20.6457
CHRAC1	Chromatin accessibility complex protein 1	11.215	5.66995	12.3849	10.4763	8.60413	7.11108	7.26294	7.2604	7.37817	10.2071	11.0233	12.3651	7.13384	9.8193	10.7528	8.9161	13.8111
CHRNA1	Acetylcholine receptor subunit alpha;Isoform of P02708, Isoform 2 of Acetylcholine receptor subunit alpha	0	0	0	0	0	0	0	0	0	0	0	0	1.67426	0	0	0	0
CHRNB1	Acetylcholine receptor subunit beta	0	0	0	0	0	7.39666	0	12.016	0	0	0	13.8292	15.4178	19.3633	0	0	26.0753
CHTF18	Chromosome transmission fidelity protein 18 homolog;Isoform of Q8WVB6, Isoform 2 of Chromosome transmission fidelity protein 18 homolog	7.07784	10.7468	5.45875	6.07584	0	6.73807	14.2008	12.2197	8.22903	0	8.18487	14.2889	8.9789	10.3844	9.14579	11.3756	14.8398
CHTOP	Chromatin target of PRMT1 protein;Isoform of Q9Y3Y2, Isoform 2 of Chromatin target of PRMT1 protein;Isoform of Q9Y3Y2, Isoform 3 of Chromatin target of PRMT1 protein	0	1.51419	0	0	0	0.993198	1.27442	1.94071	1.91491	0.37308	1.6936	0.382911	2.26581	1.25597	0	0.8171	0
CHUK	Inhibitor of nuclear factor kappa-B kinase subunit alpha	3.79054	1.55661	2.27978	3.91838	3.84244	4.13462	4.85749	5.18634	4.70271	7.14334	5.55408	5.67673	2.53585	6.2127	2.28045	7.52446	7.0231
CHURC1	Protein Churchill;Isoform of Q8WUH1, Isoform 1 of Protein Churchill	0	0.613733	0	1.27587	0.562739	0.434046	0.744924	0.472673	0.650652	0.846645	0	0.829274	0.904739	0.522012	0.307625	0.868911	1.23461
CIAO1	Probable cytosolic iron-sulfur protein assembly protein CIAO1	12.4681	11.347	12.6094	18.2015	13.6209	10.7532	14.2532	14.9025	12.7805	18.6166	18.6042	19.6561	15.9817	23.3228	10.3424	15.9322	26.5356
CIAO2A	Cytosolic iron-sulfur assembly component 2A	9.39292	8.34986	8.4819	9.60299	8.88601	6.37582	9.11197	9.37045	9.86163	16.003	10.4933	11.7381	7.34046	15.925	7.65457	12.6001	15.7735
CIAO2B	Cytosolic iron-sulfur assembly component 2B	4.01329	2.6435	3.32195	3.83448	3.50596	3.5305	4.55735	4.3708	4.27315	3.92646	6.64679	7.17295	8.03014	6.82779	3.71211	4.75636	8.84767
CIAO3	Cytosolic iron-sulfur assembly component 3	4.28549	6.85929	7.58566	9.34989	6.35927	7.07027	7.00023	3.93696	6.96063	10.639	5.21689	8.33294	8.27415	9.01946	12.0177	6.36319	16.3655
CIAPIN1	Anamorsin;Isoform of Q6FI81, Isoform 3 of Anamorsin	12.0532	10.5896	15.0867	16.9827	13.5521	8.77679	14.3256	8.17825	9.63271	14.5379	12.1175	21.9078	16.354	20.1828	15.0356	10.9642	24.7702
CILP	Cartilage intermediate layer protein 1	3.31208	2.68584	2.31736	5.39891	3.12829	5.1539	3.34512	3.60795	4.10156	4.54048	10.1885	9.8946	5.33241	3.45844	2.84984	3.0823	12.4402
CIRBP	Cold-inducible RNA-binding protein	26.212	28.404	33.4036	29.6692	24.2721	49.6176	44.9585	39.3514	29.4475	29.5802	53.4579	46.8919	32.766	54.5985	25.961	26.5629	62.579
CISD1	CDGSH iron-sulfur domain-containing protein 1	269.34	236.309	294.573	343.01	270.774	381.361	369.583	433.172	86.2876	130.167	331.598	522.153	264.316	607.408	160.776	95.758	356.803
CISD2	CDGSH iron-sulfur domain-containing protein 2	60.4089	41.4743	40.3546	71.9625	60.9406	186.01	93.2636	105.696	43.7672	42.5698	89.766	86.0792	82.9131	131.184	21.4497	63.2084	47.166
CISD3	CDGSH iron-sulfur domain-containing protein 3, mitochondrial	1.82432	1.57717	2.56562	2.25272	1.32101	2.27896	3.05219	2.62398	1.3761	2.12962	2.83669	3.96733	1.55677	3.08021	0	0	3.73189
CKAP4	Cytoskeleton-associated protein 4	2.3763	1.54021	5.71865	5.03856	1.85228	3.33915	5.85211	2.57135	5.42186	5.42127	2.46497	19.5748	6.47028	8.07756	2.38408	5.8597	17.7472
CKAP5	Cytoskeleton-associated protein 5;Isoform of Q14008, Isoform 2 of Cytoskeleton-associated protein 5;Isoform of Q14008, Isoform 3 of Cytoskeleton-associated protein 5	7.37736	6.69853	8.09642	8.99925	5.63128	4.05262	8.81074	5.13524	6.04016	5.1369	5.56048	11.028	11.0312	10.2443	6.19899	6.89565	13.2626
CKB	Creatine kinase B-type	11.5133	23.8001	38.0621	24.1438	21.548	20.1667	85.8049	12.0993	15.1687	120.504	10.9197	39.0569	40.4691	40.896	84.7463	13.0309	58.3349
CKM	Creatine kinase M-type	728.284	348.321	504.537	1222.38	730.309	1349.7	390.852	1223.66	1072.13	1330.77	1402.85	870.358	483.53	438.107	1098.55	617.27	614.651
CKMT1B	Creatine kinase U-type, mitochondrial;Isoform of P12532, Isoform 2 of Creatine kinase U-type, mitochondrial	0	0	0	0	10.897	0	143.553	0	46.3179	0	0	41.5526	0	117.701	0	43.2688	0
CKMT2	Creatine kinase S-type, mitochondrial	1363.33	1607.98	1045.67	1541.72	1493.85	2693.62	1899.38	1683.3	1069.42	2566.26	1464.91	2113.48	2453.14	2338.73	630.407	1391.15	2357.38
CLASP1	Isoform of Q7Z460, Isoform 4 of CLIP-associating protein 1	14.1384	9.51216	9.72508	11.3424	7.68258	10.6081	12.8799	12.231	9.42429	9.13485	11.0081	14.2265	13.8205	18.4918	8.37763	10.2914	22.6323
CLASP2	CLIP-associating protein 2	0	0	0	0	4.0152	3.66721	0	0	0	6.32268	0	0	0	11.5926	0	0	0
CLASP2	Isoform of O75122, Isoform 3 of CLIP-associating protein 2	10.5877	8.88954	7.71424	9.53468	6.62685	8.53957	12.1454	16.2278	10.6451	8.52514	14.142	12.7028	10.3187	16.768	7.98217	11.2713	18.3497
CLCC1	Chloride channel CLIC-like protein 1	138.612	121.194	79.4865	126.388	149.213	191.971	144.415	157.094	137.61	106.66	205.075	162.629	221.831	176.962	37.5164	139.565	156.505
CLCN1	Chloride channel protein 1	3.0655	1.96734	2.12762	3.19011	2.55627	2.49021	3.19089	4.29794	1.74642	2.86749	3.84337	2.85626	2.16184	3.70579	0	0	3.53369
CLCN3	Isoform of P51790, Isoform 3 of H(+)/Cl(-) exchange transporter 3	0	0.519134	0	0	0	0.245604	0	0.464473	0.465102	0	0	0.695662	0.758793	0.721573	0	0	0
CLCN6	H(+)/Cl(-) exchange transporter 6;Isoform of P51797, Isoform 5 of H(+)/Cl(-) exchange transporter 6	1.9125	2.24895	2.07249	1.76566	1.88195	1.65172	2.80422	0	0	0	0	0	2.443	0	0	0	0
CLCN7	H(+)/Cl(-) exchange transporter 7;Isoform of P51798, Isoform 2 of H(+)/Cl(-) exchange transporter 7	1.36647	0.912177	0.950152	0.319747	0.696959	1.50327	2.30681	1.36886	1.16506	1.08518	1.80556	3.51316	3.03825	2.35983	0.581194	1.02536	2.83223
CLDN5	Claudin-5	51.2036	46.739	49.3734	59.2661	42.0636	59.2428	35.9677	33.7334	6.0138	7.03885	44.0668	55.0932	71.6842	34.1335	0	3.88039	50.2607
CLDND1	Claudin domain-containing protein 1;Isoform of Q9NY35, Isoform 2 of Claudin domain-containing protein 1	0	7.89004	0	0	6.24176	7.73991	0	7.97371	0	0	0	0	10.0351	7.74783	0	0	0
CLEC14A	C-type lectin domain family 14 member A	7.47654	7.35494	11.9617	11.7464	8.76006	6.17214	10.9072	8.51061	7.73123	9.73647	5.44518	15.424	12.8151	13.0912	8.89859	7.72992	13.4378
CLEC16A	Protein CLEC16A	3.76791	5.00126	5.94557	5.08635	5.20723	6.13247	9.06384	10.1102	6.08203	6.30524	7.99304	9.27893	6.45391	11.6541	3.49559	7.70504	10.0677
CLEC3B	Tetranectin	20.5968	18.0875	30.3035	23.1157	18.7675	1.89905	16.5925	2.18807	16.5901	20.6349	6.68824	18.9582	29.0217	18.1543	52.0141	2.98727	57.8667
CLIC1	Chloride intracellular channel protein 1	1.42331	2.32209	2.38228	1.91472	1.60919	1.30628	3.70179	2.55776	1.92597	2.18123	1.95394	8.28892	2.40615	3.97997	5.66397	2.68581	12.689
CLIC2	Chloride intracellular channel protein 2	3.28625	2.86932	5.36652	4.96599	3.46822	3.507	3.34051	5.1637	2.96858	3.92737	4.69366	7.46102	4.83752	6.94353	4.79315	4.83365	5.17403
CLIC4	Chloride intracellular channel protein 4	12.7145	16.1651	24.1932	21.3308	14.9557	8.51796	14.9559	6.86848	12.5675	20.8882	12.2465	42.1306	16.1966	15.0654	17.2632	11.5711	41.042
CLIC5	Chloride intracellular channel protein 5	47.5555	36.7942	66.0683	67.9683	44.6485	43.7558	41.842	57.6714	44.0503	52.5293	61.7464	65.0726	26.5842	64.4437	52.3867	38.974	63.5519
CLIC6	Chloride intracellular channel protein 6;Isoform of Q96NY7, Isoform A of Chloride intracellular channel protein 6	0.484731	0.461614	0	0.211986	0.311966	0	0	0.331177	0.799187	1.54775	0	0.822618	0.602731	0.528908	0	0.755745	1.05373
CLINT1	Isoform of Q14677, Isoform 3 of Clathrin interactor 1	19.0283	17.9258	19.6695	14.863	15.1393	9.84545	25.0272	17.5372	14.8747	17.0138	18.9676	26.4727	23.3735	25.2046	16.0443	23.0131	28.8622
CLIP1	CAP-Gly domain-containing linker protein 1	33.7832	26.6182	35.1312	36.3083	28.9272	33.5302	38.363	37.4508	41.4428	37.4715	49.16	46.0573	35.9437	46.5565	25.0508	40.1675	61.5926
CLIP2	CAP-Gly domain-containing linker protein 2;Isoform of Q9UDT6, Isoform 2 of CAP-Gly domain-containing linker protein 2	1.09345	0.545732	0.883676	0.940386	0.691046	0.983866	1.2753	0.927386	0	0.745249	1.13009	2.41545	1.62788	0.977643	0.582131	0.77015	2.11899
CLN6	Ceroid-lipofuscinosis neuronal protein 6	0.46666	0.549515	0.697739	0.37932	0.459946	0.899365	0.660864	0.690654	0.265124	0	0	1.3693	1.17253	1.13365	0	0.248471	1.38398
CLN8	Protein CLN8	6.40915	3.17892	4.37515	6.40924	5.29428	6.28689	4.2561	4.55366	2.19709	0	8.09864	6.79983	8.60049	0	0	3.58736	5.86447
CLNS1A	Methylosome subunit pICln	22.914	18.7189	21.9075	26.2607	20.3895	20.6317	23.6871	21.4813	19.2685	22.2434	28.0228	31.8198	24.4075	30.9229	12.7709	22.3139	36.8577
CLPB	Isoform of Q9H078, Isoform 2 of Caseinolytic peptidase B protein homolog	8.08166	4.53189	6.36932	6.86604	6.07585	7.82773	18.3279	10.4993	6.45727	7.11871	11.4423	13.5331	11.5245	16.0096	3.38237	8.26752	14.2833
CLPP	ATP-dependent Clp protease proteolytic subunit, mitochondrial	8.63775	24.3153	28.8997	33.5202	26.6445	24.0069	51.6907	29.858	29.1708	43.8532	31.4856	55.9884	37.7071	53.282	18.8939	32.0313	67.6439
CLPTM1	Putative lipid scramblase CLPTM1	4.4885	5.84493	6.26748	7.5789	5.63517	8.19098	8.80871	9.46369	5.56607	6.74064	10.0072	13.2892	10.1865	12.0359	10.0814	9.46401	22.7368
CLPTM1L	Lipid scramblase CLPTM1L;Isoform of Q96KA5, Isoform 2 of Lipid scramblase CLPTM1L	0	0	2.05586	2.76443	2.22079	2.87366	0	2.91179	4.15574	2.77141	3.394	4.96933	4.41187	18.6458	0	3.11656	5.468
CLPX	ATP-dependent Clp protease ATP-binding subunit clpX-like, mitochondrial	5.60791	5.38616	4.29727	6.35048	5.26753	5.69686	11.8063	8.32263	4.46528	4.55304	7.64913	9.86729	9.67438	14.0275	1.81979	6.50841	9.81135
CLSTN1	Isoform of O94985, Isoform 2 of Calsyntenin-1	0	0	0	0	0	0	0	0	0	0	0.521089	0.591695	0.292094	0	0	0	0
CLTA	Isoform of P09496, Isoform Non-brain of Clathrin light chain A	6.24023	6.49201	7.49192	9.17923	6.05629	6.36848	8.67186	7.23037	7.81535	8.12833	9.13928	21.0086	14.9907	14.6245	8.81091	13.3991	20.5319
CLTB	Isoform of P09497, Isoform Non-brain of Clathrin light chain B	20.2116	18.4663	20.1741	21.3406	17.1556	20.5606	23.2548	22.728	23.6837	19.262	29.4586	37.4281	31.559	31.08	11.7902	24.2145	46.6583
CLTC	Clathrin heavy chain 1;Isoform of Q00610, Isoform 2 of Clathrin heavy chain 1	71.1706	66.8774	74.1982	75.789	58.6958	72.1831	94.0616	80.0683	80.7697	77.625	90.0144	171.632	131.681	116.756	46.4538	95.1426	166.161
CLTCL1	Clathrin heavy chain 2	2.79834	2.49161	1.90719	1.79311	2.30201	2.77547	3.70947	3.93605	2.65674	0.905944	4.67425	5.62727	4.48047	5.55367	0	2.72819	7.75941
CLU	Clusterin;Isoform of P10909, Isoform 2 of Clusterin;Isoform of P10909, Isoform 4 of Clusterin;Isoform of P10909, Isoform 5 of Clusterin;Isoform of P10909, Isoform 6 of Clusterin	35.596	69.148	67.3586	51.9047	46.4416	21.0008	78.6343	31.3444	57.6964	61.6881	48.8216	73.3328	74.8726	154.021	146.764	93.1269	119.407
CLUH	Clustered mitochondria protein homolog	7.9433	7.27075	7.63472	8.85944	6.86289	5.953	16.0218	6.15404	10.0427	10.2542	6.03826	13.0076	10.7059	16.1615	4.04223	7.09374	18.4301
CLUH	Isoform of O75153, Clustered mitochondria protein homolog;Isoform of O75153, Clustered mitochondria protein homolog	3.21885	2.74081	2.02718	4.27471	1.67343	4.82098	6.90736	6.40856	5.07047	3.62161	8.2587	6.55236	5.00061	8.58777	1.81143	3.39606	9.81813
CLYBL	Citramalyl-CoA lyase, mitochondrial	17.2743	7.41275	11.7002	10.469	15.7401	4.22217	2.91281	5.03455	3.80933	4.4361	9.45827	5.36165	2.01754	5.61152	1.95939	3.92442	10.2998
CMA1	Chymase	9.41241	8.74137	17.1986	8.41407	11.366	17.6944	15.0561	10.0777	35.3955	28.6881	8.82088	27.2834	22.1372	10.7345	13.8682	13.7333	17.8949
CMAS	N-acylneuraminate cytidylyltransferase	0	0	0.514865	0	0	0	0	2.20476	0	0	1.56896	1.82095	0	0.976743	0	0.826942	0
CMBL	Carboxymethylenebutenolidase homolog	151.426	144.604	140.279	124.597	93.9306	49.5263	48.6421	49.4152	101.496	96.5165	77.199	76.2427	31.0473	37.9735	121.933	44.0124	151.995
CMC1	COX assembly mitochondrial protein homolog	2.74158	3.437	0	2.93769	5.07116	7.53244	20.8215	15.4583	0	0	10.9651	12.3168	9.49562	25.7206	0	4.12454	14.2866
CMC2	COX assembly mitochondrial protein 2 homolog	2.10766	1.92743	3.36816	2.15529	2.30413	2.3547	7.29814	2.21953	1.31054	4.42284	1.73625	3.87345	2.97114	4.19933	1.99031	2.61321	3.20427
CMC4	Cx9C motif-containing protein 4	0.852905	1.19256	1.90411	1.18579	1.176	1.71528	2.46497	2.12697	2.73495	2.41269	1.8387	2.46036	1.78494	2.86207	1.06714	2.57499	1.4462
CMPK1	UMP-CMP kinase;Isoform of P30085, Isoform 3 of UMP-CMP kinase	63.6064	69.8199	99.2415	98.6748	79.2879	69.0615	71.7319	38.9548	69.0794	132.709	40.7016	160.435	131.227	132.856	235.354	35.4793	269.357
CMPK2	UMP-CMP kinase 2, mitochondrial	0.398108	0.268831	0.369057	0.805205	0.439549	0.363359	0.661625	0.35519	0.353793	0.920453	0.474473	0.668649	0.488904	0.904858	1.73549	0	1.15406
CMTM3	CKLF-like MARVEL transmembrane domain-containing protein 3;Isoform of Q96MX0, Isoform 2 of CKLF-like MARVEL transmembrane domain-containing protein 3	0	0	0	0	0	0.22711	0	0	0	0	0.271151	1.54311	0.908287	0	0	0	1.088
CMTR1	Cap-specific mRNA (nucleoside-2'-O-)-methyltransferase 1	1.9747	1.6028	1.85649	1.9875	1.47675	1.68126	1.30771	1.82625	1.70627	1.098	1.82983	2.96892	2.30262	2.49736	1.70499	2.13489	2.68058
CMYA5	Cardiomyopathy-associated protein 5	5.95663	5.19612	4.09254	11.2178	6.86921	8.99365	11.6899	12.0105	7.10802	5.2711	14.3091	12.841	7.23808	10.9896	3.89064	6.98514	17.1486
CNBP	CCHC-type zinc finger nucleic acid binding protein;Isoform of P62633, Isoform 2 of CCHC-type zinc finger nucleic acid binding protein	48.6968	42.9516	68.8007	53.6916	41.182	37.4055	39.9128	58.1113	49.8366	55.297	56.5343	65.3579	34.4289	65.3251	52.146	25.3148	67.5039
CNBP	Isoform of P62633, Isoform 4 of CCHC-type zinc finger nucleic acid binding protein;Isoform of P62633, Isoform 8 of CCHC-type zinc finger nucleic acid binding protein	7.18126	6.86719	10.8666	6.70203	6.54948	5.69686	6.94884	9.5843	4.79677	8.02974	10.1768	9.89915	6.03842	9.5671	6.18473	4.00383	12.0041
CNDP1	Beta-Ala-His dipeptidase	0	0.883038	0	0	0.645219	0	0	0	0	0	0	0	1.04791	0	5.22542	2.19268	1.66391
CNDP2	Cytosolic non-specific dipeptidase	2.11349	1.75744	4.07186	2.38565	1.91914	2.25702	3.20931	1.00268	2.27692	5.6105	1.79065	3.78005	3.24955	1.89924	7.68991	5.31221	5.88205
CNEP1R1	Nuclear envelope phosphatase-regulatory subunit 1;Isoform of Q8N9A8, Isoform 2 of Nuclear envelope phosphatase-regulatory subunit 1	10.0601	5.32083	6.18007	7.58589	9.30051	29.3113	6.19458	25.2093	13.0301	3.7888	19.4945	11.0027	8.1456	13.6704	0	10.6506	5.5186
CNIH4	Protein cornichon homolog 4	20.7922	13.8573	31.4263	17.5068	16.5847	42.3483	28.2952	41.1586	9.99652	7.95795	24.1386	66.8803	40.0611	23.093	13.0293	6.61569	69.1399
CNKSR1	Connector enhancer of kinase suppressor of ras 1;Isoform of Q969H4, Isoform 2 of Connector enhancer of kinase suppressor of ras 1	5.2336	5.53706	5.9237	7.98742	5.86958	4.84212	5.60547	7.55719	6.46024	8.28899	7.74661	6.92306	4.33734	9.31066	6.13509	5.48119	8.50019
CNN1	Calponin-1	3.33734	0	9.94931	6.49242	0	4.86447	7.3352	3.19419	1.12163	0	8.33896	13.2495	10.7059	0	0	4.1037	2.89687
CNN2	Calponin-2	1.3403	1.2271	1.59365	1.42859	1.19016	1.03451	2.35349	1.56049	0.614113	1.38804	1.57439	3.87702	2.50682	2.7892	0.708959	0.862135	4.77451
CNN3	Isoform of Q15417, Isoform 3 of Calponin-3	3.59584	2.94022	6.39283	4.79188	3.89679	3.21763	4.54582	3.54291	5.11386	9.40809	4.88778	8.00383	5.87927	5.77139	10.6591	5.12124	8.15885
CNOT1	CCR4-NOT transcription complex subunit 1	3.65595	2.30345	2.59533	2.4729	1.99759	3.11341	3.67293	3.89907	2.31019	2.97373	3.67631	4.87526	4.0684	4.26855	2.63161	2.92129	5.65886
CNOT10	CCR4-NOT transcription complex subunit 10;Isoform of Q9H9A5, Isoform 2 of CCR4-NOT transcription complex subunit 10;Isoform of Q9H9A5, Isoform 6 of CCR4-NOT transcription complex subunit 10	0	0.428528	0.548647	0	0.574919	0.533993	0.258352	0.553045	0	0.623019	0.342777	0.765593	0.610412	0.608948	0	0	0.693152
CNOT2	CCR4-NOT transcription complex subunit 2;Isoform of Q9NZN8, Isoform 4 of CCR4-NOT transcription complex subunit 2	0.562601	0.920618	0	0	0	0	0	0.514352	2.95086	0	0	2.25527	0	1.19945	1.99628	2.64774	2.04375
CNOT3	CCR4-NOT transcription complex subunit 3	0	0	0	2.02865	0	1.56905	1.88283	1.16322	0	0	3.06064	2.23151	3.70957	1.1879	0	0	2.08511
CNOT4	CCR4-NOT transcription complex subunit 4;Isoform of O95628, Isoform 10 of CCR4-NOT transcription complex subunit 4;Isoform of O95628, Isoform 2 of CCR4-NOT transcription complex subunit 4;Isoform of O95628, Isoform 3 of CCR4-NOT transcription complex subunit 4;Isoform of O95628, Isoform 4 of CCR4-NOT transcription complex subunit 4;Isoform of O95628, Isoform 6 of CCR4-NOT transcription complex su…	1.35083	1.34797	1.91555	1.4508	0.993589	1.29133	1.63875	1.8457	1.81321	2.04363	1.61887	2.02674	1.48567	1.99196	2.25539	1.0992	2.28733
CNOT7	CCR4-NOT transcription complex subunit 7;Isoform of Q9UIV1, Isoform 2 of CCR4-NOT transcription complex subunit 7	0	0	0	0.263637	0	0.495035	0.997728	0.919519	0.521493	0	1.15481	1.57506	0.922408	0.873535	0	0.728912	1.50567
CNOT9	CCR4-NOT transcription complex subunit 9	2.68041	2.04541	2.18521	1.43254	1.42629	2.77227	1.83363	1.90353	4.32961	2.2814	2.71339	3.92011	3.07555	3.81224	1.36717	2.71566	3.07418
CNP	2',3'-cyclic-nucleotide 3'-phosphodiesterase;Isoform of P09543, Isoform CNPI of 2',3'-cyclic-nucleotide 3'-phosphodiesterase	12.9808	11.5979	11.7813	14.1516	11.4764	15.4609	15.3395	17.0671	16.2498	15.2406	19.7748	27.9639	21.5488	20.22	8.4532	17.2217	28.8356
CNPY2	Protein canopy homolog 2	10.8718	11.1475	16.4397	13.8837	9.87431	4.76141	6.35495	8.14255	7.98268	10.4737	7.5147	11.2641	8.56886	13.0732	11.8011	6.26434	15.5392
CNPY3	Protein canopy homolog 3	2.63694	1.45807	1.96378	1.2176	1.0109	0.987497	0.812105	1.11112	1.27776	2.58882	0.93285	2.49171	2.6298	2.04353	3.36295	1.13051	4.04044
CNPY4	Protein canopy homolog 4	1.1896	1.75259	1.88449	2.37961	1.78241	1.74356	2.22593	2.172	1.59165	2.73465	2.49811	3.4554	2.57705	3.09657	1.68702	2.43487	3.23988
CNRIP1	CB1 cannabinoid receptor-interacting protein 1	10.735	12.4532	13.6268	12.978	12.4339	17.4315	26.3216	23.4564	13.991	12.5951	15.336	23.9	18.4257	25.5494	9.88373	13.1333	22.7368
CNST	Consortin	5.75176	5.70137	4.21302	6.39891	5.18808	5.15034	4.56785	8.94871	5.25471	3.74974	9.10986	7.63832	3.67302	9.77868	2.32445	3.94616	8.06545
CNTFR	Ciliary neurotrophic factor receptor subunit alpha	3.12321	2.76872	5.10967	2.88208	2.70462	3.45729	3.98118	4.13391	5.76831	2.43165	3.07123	5.84115	5.00407	6.4622	3.60264	2.2453	6.32599
COA1	Cytochrome c oxidase assembly factor 1 homolog	4.79293	3.49687	4.86176	6.90409	4.32919	5.40923	16.4745	7.22871	2.2364	6.09258	5.49556	8.26795	6.74409	15.1733	0	6.62331	7.6989
COA3	Cytochrome c oxidase assembly factor 3 homolog, mitochondrial	13.9862	12.8611	16.1619	20.1793	14.6018	17.727	29.0812	29.34	19.0392	20.4221	24.4462	25.1593	20.9809	44.6561	7.68813	20.2011	28.3093
COA4	Cytochrome c oxidase assembly factor 4 homolog, mitochondrial;Isoform of Q9NYJ1, Isoform 2 of Cytochrome c oxidase assembly factor 4 homolog, mitochondrial	0	0	0	0	0	0	0	0	0.785685	1.51845	0	0	0	0	2.21933	0	1.27447
COA5	Cytochrome c oxidase assembly factor 5	2.3752	1.49204	2.91805	2.11352	2.72086	2.39737	4.82405	4.12535	4.42638	4.51857	6.71757	5.01185	3.5565	5.05685	5.35329	5.92073	3.10476
COA6	Cytochrome c oxidase assembly factor 6 homolog;Isoform of Q5JTJ3, Isoform 2 of Cytochrome c oxidase assembly factor 6 homolog;Isoform of Q5JTJ3, Isoform 3 of Cytochrome c oxidase assembly factor 6 homolog	12.9927	12.2597	22.1153	21.1401	12.3199	13.7416	24.1664	17.7036	7.97166	14.5681	16.081	23.5558	19.3118	29.2739	9.53501	6.15283	32.6459
COA7	Cytochrome c oxidase assembly factor 7	1.40346	1.24016	1.50173	2.64366	1.35085	0.712091	2.4735	0.867283	1.86659	3.31208	1.03684	2.70768	1.90206	3.82455	3.03194	1.11551	3.72502
COASY	Bifunctional coenzyme A synthase;Isoform of Q13057, Isoform 2 of Bifunctional coenzyme A synthase	10.932	13.5388	14.9725	15.7618	12.2351	26.5055	15.0977	12.9766	17.38	26.3149	6.86771	32.9608	27.1909	34.5287	31.8215	10.3795	37.0961
COBL	Isoform of O75128, Protein cordon-bleu	1.47469	1.44238	1.35205	1.57075	1.41223	2.49882	1.38424	3.00234	0.823282	0	3.01656	5.86811	1.49632	3.35336	0	0.721731	4.81093
COBL	Isoform of O75128, Isoform 5 of Protein cordon-bleu	27.315	21.0853	25.9175	30.2975	19.8247	27.8956	18.0099	32.4833	30.8637	18.319	39.5651	64.0321	23.2233	44.0839	12.258	20.9979	70.5876
COBLL1	Cordon-bleu protein-like 1;Isoform of Q53SF7, Isoform 2 of Cordon-bleu protein-like 1;Isoform of Q53SF7, Isoform 3 of Cordon-bleu protein-like 1	0	0	0	0	0.231051	0.344934	0	0.482681	0	0	0.857456	0.893919	0.898924	0	0	0	0.495597
COG1	Conserved oligomeric Golgi complex subunit 1	2.36483	2.66796	2.31522	2.61581	1.67266	2.36176	3.93289	2.8778	3.25948	2.46264	3.96563	5.51821	4.59646	3.66674	2.55047	2.98521	5.93238
COG2	Conserved oligomeric Golgi complex subunit 2	2.68226	2.58928	2.19479	2.82297	2.02958	2.93924	3.88429	3.57817	2.3499	2.18878	4.17746	5.21793	5.20383	4.30309	1.11795	1.95468	6.27522
COG3	Conserved oligomeric Golgi complex subunit 3	1.1272	1.7123	1.32768	1.39382	1.20895	1.40908	2.347	1.39143	1.98312	2.41269	2.12428	3.46336	2.7805	2.35711	1.18993	1.7558	4.19883
COG4	Conserved oligomeric Golgi complex subunit 4	2.3383	2.391	2.53159	3.16524	1.72905	2.4925	3.57036	2.50588	2.98984	2.75234	2.61645	5.22274	4.14308	3.58163	1.85533	2.90787	5.32143
COG5	Conserved oligomeric Golgi complex subunit 5;Isoform of Q9UP83, Isoform 2 of Conserved oligomeric Golgi complex subunit 5;Isoform of Q9UP83, Isoform 3 of Conserved oligomeric Golgi complex subunit 5	1.1984	1.21361	1.17434	1.91032	1.19731	1.12651	2.54807	1.39143	1.86831	1.90898	1.90771	2.6841	2.52769	2.21707	1.2463	1.74854	3.68493
COG6	Conserved oligomeric Golgi complex subunit 6	0.87418	1.34673	1.63491	1.24281	0.748354	1.49877	1.89283	1.4014	1.8359	0.791045	2.12771	2.8668	2.35409	1.84451	1.13272	0.939886	2.4084
COG7	Conserved oligomeric Golgi complex subunit 7	1.55275	1.55446	1.48011	1.33939	1.38041	1.71765	2.59904	1.94295	2.58493	1.85268	2.04791	3.59003	2.84199	2.5875	0.997289	1.47155	3.89609
COG8	Conserved oligomeric Golgi complex subunit 8	2.12618	1.95335	2.31576	2.90607	2.1449	2.08466	2.58114	2.13974	2.09579	2.32435	2.35783	3.49782	3.21531	2.64046	1.66464	1.7186	4.09948
COIL	Coilin	0	0	0	0	0.396376	0	0	0	0	0	0	0	0	0	0	0	0
COL12A1	Collagen alpha-1(XII) chain	0	1.49789	2.65212	0	0	1.15861	0	0	0	0	1.15828	0	1.36403	0.635448	0	0	2.27054
COL13A1	Collagen alpha-1(XIII) chain;Isoform of Q5TAT6, Isoform 10 of Collagen alpha-1(XIII) chain;Isoform of Q5TAT6, Isoform 2 of Collagen alpha-1(XIII) chain;Isoform of Q5TAT6, Isoform 5 of Collagen alpha-1(XIII) chain;Isoform of Q5TAT6, Isoform 6 of Collagen alpha-1(XIII) chain	2.09749	0	2.27978	3.18204	2.50154	3.15381	4.17554	3.6221	2.43304	2.82814	2.27988	5.52329	3.08477	0	1.57587	2.88918	4.35942
COL14A1	Collagen alpha-1(XIV) chain	8.91253	8.90798	8.34244	2.45418	9.79055	0	0	0	9.43515	2.13403	0	20.5446	27.1596	0	0	8.94695	19.6892
COL15A1	Collagen alpha-1(XV) chain	21.6023	16.7486	26.5579	19.3913	20.2212	20.8851	16.835	18.0327	24.7542	25.7218	16.5887	32.5236	11.8011	55.2434	9.89056	12.7079	43.9166
COL18A1	Collagen alpha-1(XVIII) chain	9.37132	6.66929	11.4629	7.2428	10.6956	14.2277	4.8285	11.0093	18.9604	10.9952	7.982	12.6852	9.89745	16.0539	6.62096	4.32888	15.081
COL1A1	Collagen alpha-1(I) chain	51.8204	46.836	73.5687	29.6829	66.4824	103.737	19.4139	61.0605	29.5018	21.9635	31.7696	47.8518	75.7222	21.5665	0	16.2022	39.7401
COL1A2	Collagen alpha-2(I) chain	29.451	22.8391	36.8038	20.7399	32.0042	49.6519	16.2148	31.4891	24.5442	26.0196	23.2869	28.1967	39.4569	16.3524	17.7183	18.0957	27.5251
COL24A1	Collagen alpha-1(XXIV) chain	0	0	0	0	0	0.793662	0	1.71934	0	0.983108	0	2.09893	0.779333	1.23931	0.908073	1.77613	1.75077
COL3A1	Collagen alpha-1(III) chain	19.2797	24.3097	18.2976	17.6444	15.9958	34.933	0	16.4612	32.3481	34.882	8.63201	31.2391	34.6835	17.6881	14.8909	15.0999	30.1182
COL4A1	Collagen alpha-1(IV) chain	14.9762	9.3687	7.94316	10.0048	11.741	9.87952	6.374	6.54577	6.0513	0	8.55878	10.0346	9.3826	7.29592	13.6969	13.058	11.9544
COL4A2	Collagen alpha-2(IV) chain	11.0256	4.29318	8.4819	7.5354	5.07817	11.4613	0	7.45866	0	2.43221	11.133	11.2953	8.64417	9.50562	0	0	10.3616
COL4A3	Collagen alpha-3(IV) chain	6.01729	3.08091	2.76626	2.89272	4.04489	6.7645	0	7.19218	1.43202	1.5992	0	2.70146	4.80091	3.09942	0	0	4.5439
COL5A1	Collagen alpha-1(V) chain;Isoform of P20908, Isoform 2 of Collagen alpha-1(V) chain	0	0.318258	1.04567	0	0	0.783855	0	0	3.51762	3.4348	0	0	0	1.77248	2.49816	2.75471	0
COL5A2	Collagen alpha-2(V) chain	12.7879	22.7028	0	0	9.3693	3.84092	0	0	0	0	0	0	3.44606	0	0	0	0
COL5A3	Collagen alpha-3(V) chain	3.00539	1.79382	2.06392	1.43882	3.60834	7.06213	2.06449	4.65115	0	0	2.9834	1.95388	4.5188	1.13731	0	0	3.0488
COL6A1	Collagen alpha-1(VI) chain	18.9017	17.8846	22.3148	14.7845	40.189	46.7558	9.34571	53.7107	26.1486	27.9127	23.0469	19.9204	23.7095	24.9621	6.53162	11.9337	15.7409
COL6A2	Collagen alpha-2(VI) chain	27.0521	23.077	31.959	23.7742	53.3343	61.057	16.4101	75.9033	49.6534	55.081	33.1369	29.9432	36.8997	41.3886	6.05928	19.8415	22.7054
COL6A3	Isoform of P12111, Isoform 4 of Collagen alpha-3(VI) chain	0	0	0	0	0	0	0	0	0	0	0	0	0	0	0	0	0
COL6A3	Collagen alpha-3(VI) chain	31.463	26.606	33.7982	25.7695	57.9305	69.1569	18.2521	75.4676	51.4693	55.4883	33.0988	33.2352	39.0592	44.8725	12.532	23.8218	25.2947
COLEC11	Collectin-11;Isoform of Q9BWP8, Isoform 10 of Collectin-11;Isoform of Q9BWP8, Isoform 4 of Collectin-11	0	0	1.30315	0	0	2.95962	6.53149	3.16418	1.90875	3.52778	4.50103	4.96019	3.54669	7.10527	5.76396	4.37396	7.01179
COLEC12	Collectin-12	1.06488	1.22174	2.02999	1.529	1.11817	1.25411	2.37472	1.04824	1.68791	2.59718	1.65505	3.58425	3.81437	2.88789	2.05978	2.62045	5.54407
COLGALT1	Procollagen galactosyltransferase 1	0	4.31499	3.86272	3.29008	2.44291	1.52945	4.75458	4.26639	4.80561	5.69117	1.76731	8.00383	5.71904	13.4766	4.63469	3.8245	13.284
COMMD1	COMM domain-containing protein 1	2.93225	2.15268	3.24036	3.39787	2.39501	2.19956	3.89684	2.31558	2.80252	5.09215	3.51085	5.81431	4.91386	2.73703	2.56225	3.54059	6.35666
COMMD10	COMM domain-containing protein 10	1.27263	1.23617	1.95296	1.7128	0.921525	1.25353	2.15086	1.23072	1.53585	2.08546	2.2569	3.57848	2.53002	2.26246	1.12933	1.50167	4.76024
COMMD2	COMM domain-containing protein 2;Isoform of Q86X83, Isoform 2 of COMM domain-containing protein 2	2.41269	1.77002	3.15713	3.02835	2.25428	2.48162	4.07861	2.76287	5.69441	5.99793	3.78714	4.05413	4.12784	3.38829	4.95246	3.8043	6.23345
COMMD3	COMM domain-containing protein 3	3.86546	2.8053	4.86176	3.21149	3.35666	3.59696	6.05637	3.96425	5.36721	8.09099	5.36429	9.54768	7.88539	5.27692	3.39876	5.6218	9.73036
COMMD4	COMM domain-containing protein 4	2.0091	1.87923	2.60731	2.07303	1.52267	1.80524	3.08044	2.1304	2.48227	3.11388	3.17623	4.70325	3.8835	2.87926	0.858857	2.74837	5.41039
COMMD5	COMM domain-containing protein 5	0.869362	1.15952	1.68536	0.865578	1.01299	0.965241	2.17026	1.23072	2.13034	2.55095	1.79685	3.34656	2.72661	1.4128	2.60029	1.82968	3.98317
COMMD6	COMM domain-containing protein 6	1.13397	1.32733	1.69041	1.65046	1.0561	1.05617	2.44631	1.59353	1.93397	2.72836	2.32173	3.35273	2.50567	2.58988	1.92851	2.67716	5.33985
COMMD7	COMM domain-containing protein 7;Isoform of Q86VX2, Isoform 2 of COMM domain-containing protein 7	3.17176	2.7982	3.81762	3.0193	3.19527	2.46738	4.29647	2.20577	3.00641	3.67622	3.62086	6.52526	4.16796	4.09336	5.3644	3.36802	7.25485
COMMD8	COMM domain-containing protein 8	0.554371	0.559344	1.05195	0.549929	0.580774	0.418346	1.12076	0.647829	0.807325	1.1442	0.842	1.2263	1.05153	1.16703	0.891294	0.82106	1.62978
COMMD9	COMM domain-containing protein 9	5.45759	3.89027	4.04476	4.05795	2.66383	3.82064	4.86533	4.47261	5.96141	6.3959	5.19651	7.20938	6.48968	5.93308	2.80815	7.48127	10.82
COMP	Cartilage oligomeric matrix protein	2.2131	11.4969	1.85436	2.81842	1.7989	2.45039	3.09965	4.45308	4.82224	2.60077	5.26395	5.04078	4.75908	5.97971	2.85444	9.06515	8.57687
COMT	Catechol O-methyltransferase;Isoform of P21964, Isoform Soluble of Catechol O-methyltransferase	65.4487	59.0989	74.3007	105.028	79.4158	46.5303	87.6016	59.1644	88.9096	99.7014	70.8944	95.2353	81.9074	104.107	65.196	58.9624	111.951
COMTD1	Catechol O-methyltransferase domain-containing protein 1	2.83401	4.661	6.87374	8.94759	3.74117	6.47196	19.481	6.57447	2.42242	9.76341	4.43212	20.1511	11.7848	21.4181	5.90501	8.85473	14.3261
CONHIT000292931	CONHIT000292931	4.50921	7.86284	18.642	26.1702	14.7471	0	46.1437	0	34.7655	16.615	0	6.57504	37.6117	39.8181	5.61851	19.9193	0
CONKRT10	CONP13645;Keratin, type I cytoskeletal 10	3.75319	3.51949	2.0936	4.77536	2.38455	1.16261	1.98661	2.62277	6.71968	10.0647	5.43015	6.87698	2.69168	0	4.22884	3.79555	5.92692
CONKRT14	CONP02533;Keratin, type I cytoskeletal 14	0	5.66212	16.3002	0	0	0	8.96009	0	0	0	11.0335	0	15.053	0	7.09449	10.7938	0
CONKRT7	CONP08729;Keratin, type II cytoskeletal 7	0	0	0	0	0	0	0	0	0	1.39959	0	0	0	0	0	0	0
CONKRT79	CONQ5XKE5	0	0	2.17017	0	0	0	2.50907	1.31966	0	0	4.06548	2.50321	3.22272	0	0	0	1.98623
CONP00761	CONP00761	147232	134859	131793	143188	169671	208754	116523	176628	83608.2	87882.3	151186	146824	161519	150897	68852.7	78446.8	108400
CONP15636	CONP15636	68281.1	70449.7	91895.3	49091.5	90179.3	97305.1	52639.6	110423	168868	152652	52603.2	62531.4	88761.2	50452.2	143920	115978	35045.2
COPA	Coatomer subunit alpha	59.7586	46.5886	51.9629	53.5804	41.7549	66.1204	70.7803	75.7985	64.0691	54.1878	83.8517	131.008	89.7683	77.4962	20.0457	64.9943	129.756
COPB1	Coatomer subunit beta	14.9417	11.9613	14.0894	13.2101	10.5416	16.019	19.7293	17.1696	13.2479	14.0153	18.4337	37.549	25.4462	22.4171	7.18821	13.7903	35.7955
COPB2	Coatomer subunit beta';Isoform of P35606, Isoform 2 of Coatomer subunit beta'	18.5567	15.6848	18.6506	17.6403	14.3518	22.1226	22.2337	24.0802	22.047	19.0678	26.8851	43.3908	29.5001	27.082	11.2311	21.5663	47.5914
COPE	Coatomer subunit epsilon	18.1845	13.724	21.4879	21.1644	12.6855	17.4798	21.848	18.0368	19.6268	15.08	20.0038	41.6964	16.9209	27.4271	9.5416	17.4733	47.242
COPG1	Coatomer subunit gamma-1	7.32826	5.74486	11.2588	10.0301	5.81711	5.44673	12.6681	6.60025	3.35389	3.80804	9.15402	32.3741	10.3139	17.7411	7.3438	6.98836	31.6832
COPG2	Coatomer subunit gamma-2	1.90546	1.74132	4.35706	3.38303	2.07017	1.84432	3.92024	2.46809	3.06937	3.25163	2.25119	11.2382	4.55956	5.31962	0	2.72631	9.16281
COPRS	Coordinator of PRMT5 and differentiation stimulator	2.11106	2.18564	2.14978	3.29159	2.19082	2.26066	3.93652	3.78147	2.17495	1.7791	4.62394	4.52687	3.41211	5.84764	2.25695	1.99148	6.56038
COPS2	COP9 signalosome complex subunit 2	56.5198	49.8172	46.2161	65.8577	44.9683	38.7557	68.7721	47.573	61.0448	57.7832	54.1641	74.2503	54.6542	88.9366	46.6682	52.805	98.6572
COPS3	COP9 signalosome complex subunit 3	43.3013	42.09	40.3546	50.0157	37.9845	52.3523	61.7607	63.2354	54.7707	48.4509	70.2768	76.2251	55.1726	84.7774	45.2919	59.2346	97.3708
COPS4	COP9 signalosome complex subunit 4	64.5061	58.638	56.091	70.9588	52.1443	46.04	80.67	55.1265	85.4572	76.0679	59.3215	91.4951	66.6535	102.561	63.7707	70.287	115.885
COPS5	COP9 signalosome complex subunit 5	70.5831	63.3402	62.2864	84.0246	54.4762	59.8185	95.612	71.7234	87.9728	89.1459	76.2802	115.531	84.1053	140.631	84.2017	84.2122	157.663
COPS6	COP9 signalosome complex subunit 6	91.0544	81.6356	82.6405	97.4106	72.1783	104.408	121.594	117.101	107.683	97.9493	132.468	148.115	108.548	167.178	85.3927	113.051	178.455
COPS7A	COP9 signalosome complex subunit 7a	47.3479	43.2692	43.2308	51.5236	38.0458	37.6648	60.7173	47.9579	56.3571	54.3878	50.9697	72.4099	51.5256	79.5207	43.0052	48.1809	92.5185
COPS7B	COP9 signalosome complex subunit 7b	14.4245	0	23.5827	20.6589	0	18.3373	18.164	14.9266	11.5971	19.0503	15.7584	20.3797	9.39341	21.1778	21.2971	13.5855	15.5464
COPS8	COP9 signalosome complex subunit 8	42.6875	40.3255	42.2857	50.9573	37.619	47.9221	59.117	58.2989	54.7707	64.2394	59.3761	76.2076	54.4406	82.2016	55.3632	65.6864	85.0411
COPZ1	Coatomer subunit zeta-1;Isoform of P61923, Isoform 4 of Coatomer subunit zeta-1	11.2021	10.4563	10.7843	12.575	9.56328	10.8652	12.7002	11.5867	14.9503	15.0384	14.0124	18.0841	12.3232	17.7779	16.5166	14.5136	19.2189
COPZ2	Coatomer subunit zeta-2	9.78139	7.98876	14.0182	15.101	11.0664	7.15708	11.9926	7.10822	13.0211	16.8617	9.91772	16.9004	12.2074	13.1972	11.6687	12.4559	18.337
COQ10A	Coenzyme Q-binding protein COQ10 homolog A, mitochondrial;Isoform of Q96MF6, Isoform 2 of Coenzyme Q-binding protein COQ10 homolog A, mitochondrial;Isoform of Q96MF6, Isoform 3 of Coenzyme Q-binding protein COQ10 homolog A, mitochondrial	65.148	46.8036	38.5206	68.4237	44.0663	56.9424	190.683	91.9095	39.0705	54.2752	62.692	74.0966	86.5213	136.515	25.1316	86.4918	76.9713
COQ10B	Coenzyme Q-binding protein COQ10 homolog B, mitochondrial;Isoform of Q9H8M1, Isoform 2 of Coenzyme Q-binding protein COQ10 homolog B, mitochondrial	9.65163	6.56567	6.37666	5.76244	15.722	22.2965	24.792	24.6809	0	0	9.6541	8.10584	53.0668	24.1646	0	6.69384	5.85502
COQ2	4-hydroxybenzoate polyprenyltransferase, mitochondrial;Isoform of Q96H96, Isoform 3 of 4-hydroxybenzoate polyprenyltransferase, mitochondrial;Isoform of Q96H96, Isoform 4 of 4-hydroxybenzoate polyprenyltransferase, mitochondrial;Isoform of Q96H96, Isoform 5 of 4-hydroxybenzoate polyprenyltransferase, mitochondrial;Isoform of Q96H96, Isoform 6 of 4-hydroxybenzoate polyprenyltransferase, mitochondr…	0.13874	0	0.0938411	0.15915	0.184972	0.33284	0.795266	0.503107	0	0	0.515599	0.449778	0.573883	0.754537	0	0.116594	1.03951
COQ3	Ubiquinone biosynthesis O-methyltransferase, mitochondrial	60.7856	56.6212	53.1121	92.4712	74.081	58.9163	111.433	59.4923	46.7788	73.4855	63.7253	84.9763	72.2642	102.089	45.3024	62.3843	100.353
COQ5	2-methoxy-6-polyprenyl-1,4-benzoquinol methylase, mitochondrial	56.624	56.9219	48.1386	74.0638	75.6845	81.3459	159.887	104.872	58.8367	72.9124	89.2713	109.723	113.507	135.45	32.9929	63.8374	89.172
COQ6	Ubiquinone biosynthesis monooxygenase COQ6, mitochondrial;Isoform of Q9Y2Z9, Isoform 3 of Ubiquinone biosynthesis monooxygenase COQ6, mitochondrial	40.7381	43.7501	38.7876	70.5028	57.3861	51.4797	78.9246	49.5291	31.7869	64.1655	62.8076	75.6655	55.1472	80.4786	34.9882	50.1389	85.7687
COQ7	5-demethoxyubiquinone hydroxylase, mitochondrial	49.057	60.7686	50.1179	81.4904	74.423	47.7899	97.0761	53.6859	51.8261	88.7159	62.1315	80.2598	73.5061	115.367	54.4278	57.4348	101.328
COQ8A	Atypical kinase COQ8A, mitochondrial	207.11	241.035	233.611	282.883	267.305	287.168	544.894	352.582	230.435	289.735	278.491	357.107	330.539	402.328	109.83	263.982	330.391
COQ9	Ubiquinone biosynthesis protein COQ9, mitochondrial	263.452	291.998	360.49	535.434	449.58	430.463	618.888	413.962	382.427	729.46	420.544	523.237	428.571	600.593	306.211	482.253	496.397
CORO1A	Coronin-1A	2.28087	2.86141	2.65273	2.94718	2.2809	0.479331	1.94094	0	0	4.64624	1.31254	6.32409	3.24208	2.49851	5.10765	3.13744	11.8067
CORO1B	Coronin-1B	2.4992	3.08659	5.41493	4.76109	3.11535	1.47787	2.55101	1.88044	2.05186	5.51063	2.44293	5.51059	5.26288	3.6457	3.11617	3.82627	6.68542
CORO1C	Coronin-1C;Isoform of Q9ULV4, Isoform 2 of Coronin-1C;Isoform of Q9ULV4, Isoform 3 of Coronin-1C	2.6872	2.93751	4.49773	4.93067	2.19486	0.823827	2.67678	1.62054	3.05526	5.75177	2.21622	7.44386	5.72167	3.68621	4.36939	4.99201	9.65003
CORO6	Isoform of Q6QEF8, Isoform 3 of Coronin-6;Isoform of Q6QEF8, Isoform 4 of Coronin-6	0.504662	0	0	0	0	0.555822	1.13295	0.849886	0.795332	0.753705	0.716988	1.62666	0.869607	0.797959	0	0.681828	0.851782
CORO6	Isoform of Q6QEF8, Isoform 5 of Coronin-6	7.54572	6.26007	6.01718	7.09751	5.00619	7.44622	10.2097	8.30731	9.26507	10.1182	9.23872	13.6709	9.0766	10.7468	8.48831	10.2041	17.3552
CORO7	Isoform of P57737, Isoform 3 of Coronin-7	29.067	22.897	20.1833	25.1019	35.3514	48.221	45.3954	39.5422	23.3856	22.8613	40.3749	42.0531	33.6607	36.0811	11.6044	31.0295	33.8165
COX11	Cytochrome c oxidase assembly protein COX11, mitochondrial	14.2037	14.648	16.0655	15.1812	14.3023	22.2759	34.907	27.4954	9.16112	9.06988	27.5684	34.3082	22.0507	40.6987	7.13873	12.2652	26.812
COX14	Cytochrome c oxidase assembly protein COX14	6.72358	5.53324	9.66481	8.94142	6.30967	7.54286	12.5896	14.9369	4.06676	4.24132	9.74792	12.2828	8.53539	14.8655	3.25777	2.35383	13.1592
COX15	Isoform of Q7KZN9, Isoform 2 of Cytochrome c oxidase assembly protein COX15 homolog	3.23147	2.54378	4.13517	3.69748	2.5416	4.01824	7.8093	6.85742	2.99122	4.21116	4.91147	5.76764	6.26503	8.84057	3.24953	3.84216	4.80207
COX16	Cytochrome c oxidase assembly protein COX16 homolog, mitochondrial	2.45076	7.67148	0	1.50767	2.29989	4.20955	2.17827	3.05113	1.37293	0	3.41595	6.75769	4.04132	5.38741	0	3.81922	3.96395
COX17	Cytochrome c oxidase copper chaperone	26.1397	20.6909	46.1204	42.1314	30.0751	26.9734	37.7235	18.3722	18.4267	23.3723	27.4544	58.0094	45.6376	37.66	19.0336	6.55806	68.8222
COX18	Cytochrome c oxidase assembly protein COX18, mitochondrial	0	0	1.95611	3.09105	3.40179	3.61273	8.05587	0	0	0	2.73094	3.02133	5.33732	5.06384	0	2.86335	3.32146
COX19	Cytochrome c oxidase assembly protein COX19	15.1043	12.6788	15.3036	16.327	13.0079	19.9773	25.6751	25.0646	16.9961	19.7334	23.2066	24.5187	12.9934	35.8658	11.1512	25.2624	26.2984
COX20	Cytochrome c oxidase assembly protein COX20, mitochondrial;Isoform of Q5RI15, Isoform 2 of Cytochrome c oxidase assembly protein COX20, mitochondrial	22.7982	15.3879	13.8068	16.8115	15.926	15.9271	49.3415	13.532	10.8955	13.122	20.6306	24.3724	20.7933	32.5897	9.28584	16.5073	35.5491
COX4I1	Cytochrome c oxidase subunit 4 isoform 1, mitochondrial	4444.27	1968.7	2607.31	4100.21	2523.52	6624.24	5122.86	4833.49	3197.04	4458.63	4514.52	3975.56	5039.91	3898.35	1842.98	2597.62	3839.98
COX5A	Cytochrome c oxidase subunit 5A, mitochondrial	893.719	621.412	846.044	634.901	796.172	1335.17	2498.11	1165.36	907.295	905.11	728.638	1606.56	1189.39	1532.08	541.653	1012.22	1074.8
COX5B	Cytochrome c oxidase subunit 5B, mitochondrial	234.477	136.703	345.934	427.077	173.623	478.89	972.775	212.159	247.656	354.488	321.153	867.357	337.383	556.007	300.415	230.608	912.701
COX6A1	Cytochrome c oxidase subunit 6A1, mitochondrial	0	0	0.745922	2.91143	1.62857	1.77597	3.50762	1.52111	1.30602	1.56028	2.933	3.72562	2.69975	0	0	1.57281	2.6609
COX6A2	Cytochrome c oxidase subunit 6A2, mitochondrial	33.289	50.9424	35.0423	33.1823	34.057	74.9266	94.235	19.1585	6.17374	12.6445	15.4352	59.5797	69.6343	0	5.15847	9.01727	11.8366
COX6B1	Cytochrome c oxidase subunit 6B1	158.307	112.662	194.981	152.443	120.173	276.144	401.432	194.026	266.654	396.462	136.148	425.401	279.72	368.706	351.82	212.753	386.215
COX6C	Cytochrome c oxidase subunit 6C	1245.38	707.423	865.751	1012.53	833.311	2704.18	4136.3	2538.4	591.492	1388.68	1852.3	1642.09	1389.07	2827.36	502.483	1312.73	1631.66
COX7A1	Cytochrome c oxidase subunit 7A1, mitochondrial	727.111	416.37	686.741	771.092	399.951	707.352	2023.54	556.238	326.85	511.33	554.003	1074.73	923.471	1584.46	683.158	434.085	888.85
COX7A2	Cytochrome c oxidase subunit 7A2, mitochondrial	60.6598	33.8282	75.1265	66.0703	42.6881	71.9343	181.181	65.052	70.7536	107.523	59.5404	106.954	102.997	149.858	79.9137	83.517	99.0669
COX7A2L	Cytochrome c oxidase subunit 7A-related protein, mitochondrial	45.2065	27.3262	33.4575	36.6359	24.0994	50.8435	67.7505	82.2547	32.4451	51.2745	39.0132	45.0296	61.6202	97.9897	34.2548	40.5952	39.6578
COX7B	Cytochrome c oxidase subunit 7B, mitochondrial	39.637	31.9433	59.9505	48.7423	36.7288	62.393	108.022	54.3201	32.5348	51.4756	41.4488	94.7323	71.7172	83.8456	47.1434	43.1395	67.9092
COX7C	Cytochrome c oxidase subunit 7C, mitochondrial	1923.54	1802.1	1519.82	2150.34	1720.71	2545.87	3332.06	1288.43	1314.77	1670.33	1438.84	3483.36	2412.25	1833.92	869.203	1176.18	1517.15
COX8A	Cytochrome c oxidase subunit 8A, mitochondrial	18.3781	13.6138	17.2462	16.7806	12.9332	31.7275	53.0166	23.478	15.1408	27.9641	18.1473	47.8738	28.6104	47.8388	16.4142	24.2927	34.3027
CP	Ceruloplasmin	10.7177	1.86371	1.08616	3.13766	1.07425	1.0369	3.23826	1.46171	2.67885	2.33669	5.86424	2.69524	2.45993	9.5429	3.47713	3.58736	4.6906
CPA3	Mast cell carboxypeptidase A	19.5659	26.5448	43.7818	21.2572	29.0273	34.3428	42.6493	26.7461	65.8186	35.5551	21.8581	74.9718	57.5206	33.7272	17.3869	23.9263	49.5369
CPB2	Carboxypeptidase B2	5.37033	8.5051	13.7846	8.4685	6.5269	4.59553	13.3233	6.11449	8.06582	11.4367	11.4977	8.88788	10.7256	15.114	17.0852	13.6105	17.6697
CPEB3	Cytoplasmic polyadenylation element-binding protein 3;Isoform of Q8NE35, Isoform 2 of Cytoplasmic polyadenylation element-binding protein 3	0.23752	0	0.332731	0.144779	0.152443	0.139745	0.248606	0.344636	0.386944	0.27152	0.176853	0.139733	0.32094	0.283844	0	0.317816	0.35207
CPEB4	Cytoplasmic polyadenylation element-binding protein 4;Isoform of Q17RY0, Isoform 2 of Cytoplasmic polyadenylation element-binding protein 4	1.51043	1.12093	1.46081	1.02945	0.892086	0.818532	1.12697	1.23897	2.35586	2.94714	1.30021	1.8176	1.24	1.31941	1.18119	1.51906	2.07888
CPN1	Carboxypeptidase N catalytic chain	4.47405	7.46413	15.4381	8.96203	11.779	5.53778	11.3661	10.2273	19.5186	10.9094	14.3553	7.05989	7.24975	15.6957	14.4951	13.8923	16.7428
CPN2	Carboxypeptidase N subunit 2	0.976789	2.07864	2.68407	1.84165	1.0882	0	1.28591	0	1.29732	2.60017	1.18471	1.64853	1.87769	3.04425	5.98165	2.56493	2.36227
CPNE1	Copine-1	7.408	7.54014	7.68056	11.54	5.52595	2.45661	5.31266	2.64582	6.63054	21.8274	0.988808	9.30461	5.30546	6.73721	32.8338	6.14575	3.71902
CPNE3	Copine-3	9.72749	8.32682	9.49059	13.1888	8.42184	15.0292	7.4116	14.6609	17.051	15.5776	15.8494	28.1513	11.4584	12.0581	15.301	16.165	31.3999
CPNE4	Isoform of Q96A23, Isoform 2 of Copine-4	0	0	0	0	0.348584	0.572316	0.366279	0	0	0	0	0	0	0	0	0.214721	0
CPOX	Oxygen-dependent coproporphyrinogen-III oxidase, mitochondrial	2.89401	3.476	4.07561	2.48488	2.87281	3.57385	3.84868	3.19787	0.764097	2.08642	3.48668	3.81503	2.4605	3.4157	0	2.28494	4.64439
CPPED1	Serine/threonine-protein phosphatase CPPED1	4.74243	4.09053	14.2394	7.14013	3.87799	2.41677	3.76801	2.06662	2.33372	7.5858	2.3562	6.07013	3.84435	5.20931	6.45983	2.26399	11.4929
CPSF2	Cleavage and polyadenylation specificity factor subunit 2	1.48525	0.850314	2.05728	2.27723	1.33078	1.54823	2.19995	3.14022	1.56045	1.82306	1.84082	2.3426	2.26164	2.51582	0	1.80208	3.63437
CPSF3	Cleavage and polyadenylation specificity factor subunit 3	0	0	4.74344	0	1.87675	0	0	2.03311	1.85033	6.43578	0	3.57765	2.43794	3.08873	0	3.21792	6.76128
CPSF6	Isoform of Q16630, Isoform 2 of Cleavage and polyadenylation specificity factor subunit 6	3.8619	3.24474	8.25264	0	3.48744	4.8903	6.14062	6.5067	4.71681	3.61661	5.2217	8.48981	3.44368	7.91736	0	3.15628	4.50535
CPSF7	Cleavage and polyadenylation specificity factor subunit 7;Isoform of Q8N684, Isoform 2 of Cleavage and polyadenylation specificity factor subunit 7;Isoform of Q8N684, Isoform 3 of Cleavage and polyadenylation specificity factor subunit 7	10.7845	7.394	6.35028	0	0	18.9774	11.7547	15.8147	11.726	8.4977	19.1299	13.3474	10.5178	12.9951	3.95659	10.4779	12.7888
CPT1A	Carnitine O-palmitoyltransferase 1, liver isoform	3.0493	2.87726	4.18305	3.01028	2.63334	3.00217	4.68287	2.9755	3.32008	3.52697	5.21689	5.6715	4.24838	5.41353	0.875631	4.43379	6.55132
CPT1B	Carnitine O-palmitoyltransferase 1, muscle isoform	64.6697	49.5883	49.9336	54.3383	61.7742	105.837	150.63	127.192	54.3186	67.422	134.559	126.182	80.4309	167.602	17.4993	66.1112	125.034
CPT2	Carnitine O-palmitoyltransferase 2, mitochondrial	1.04208	1.24732	4.68698	2.66199	2.06874	4.35347	4.13249	3.82526	2.71424	2.09798	5.44267	4.25401	3.21161	2.85878	3.06211	2.83906	4.15077
CPTP	Ceramide-1-phosphate transfer protein	100.508	59.7282	60.9387	73.4863	92.5352	72.935	77.8596	80.9582	78.2976	140.605	92.7709	50.886	89.5	86.0757	60.1895	89.5726	70.5876
CPVL	Probable serine carboxypeptidase CPVL	3.52615	3.84751	2.61513	7.12043	3.20854	2.78828	3.76975	3.3378	3.33771	5.30153	5.24339	7.04852	7.89629	6.42807	4.19393	5.50903	9.84983
CRADD	Death domain-containing protein CRADD	7.67893	5.56134	14.0829	8.5115	7.00176	8.27058	6.44039	5.114	9.99421	14.6792	4.38038	15.2756	6.47326	7.99246	13.4036	2.62045	14.4554
CRAT	Carnitine O-acetyltransferase;Isoform of P43155, Isoform 2 of Carnitine O-acetyltransferase	269.03	249.448	220.492	253.692	210.915	281.991	778.775	303.431	245.498	279.448	412.964	366.774	329.627	514.02	219.999	311.512	392.309
CRB1	Protein crumbs homolog 1;Isoform of P82279, Isoform 2 of Protein crumbs homolog 1;Isoform of P82279, Isoform 3 of Protein crumbs homolog 1	0	0	0	0	0	0	1.19155	0	0	0	0	0	0.736586	1.24474	0	0	0
CRBN	Protein cereblon;Isoform of Q96SW2, Isoform 2 of Protein cereblon	5.67938	5.69219	6.11073	8.45096	5.7083	5.87538	7.45954	6.54275	8.22903	6.47443	7.79672	9.68051	7.39645	10.3653	5.32747	5.1295	10.6103
CREG1	Protein CREG1	0	0	0.874366	0	0	0	0.941699	0	0	0	0	0	1.59229	0.442772	0	0	0
CRELD1	Protein disulfide isomerase CRELD1	6.32122	6.07127	6.74828	9.76127	6.30677	8.52189	9.63856	11.1779	8.66061	6.66042	10.7155	14.0831	12.8595	15.4661	5.6043	8.53641	15.3543
CRELD2	Protein disulfide isomerase CRELD2;Isoform of Q6UXH1, Isoform 4 of Protein disulfide isomerase CRELD2;Isoform of Q6UXH1, Isoform 5 of Protein disulfide isomerase CRELD2;Isoform of Q6UXH1, Isoform 6 of Protein disulfide isomerase CRELD2	0.112435	0	0.565188	0	0	0	0	0	0	0	0	0.582503	0.684263	0.410469	0	0	0.783121
CRIP1	Cysteine-rich protein 1	23.9277	34.776	94.7094	30.5989	22.167	27.5319	49.535	42.0495	28.9567	78.56	49.9013	130.887	93.223	53.3802	61.6341	51.1535	68.4429
CRIP2	Cysteine-rich protein 2	24.0825	18.4238	57.4504	26.11	21.8679	17.5969	31.8796	21.1038	11.8317	16.5425	29.0879	51.5701	34.5958	39.3442	21.6681	22.6765	34.3343
CRK	Adapter molecule crk	6.32413	6.34424	8.3559	8.90033	5.91026	4.85664	7.36567	5.40332	7.49115	11.0485	4.54791	11.1403	8.55703	10.4131	11.7821	8.59162	11.7416
CRKL	Crk-like protein	50.7342	48.7955	72.6094	69.7439	47.7757	29.5826	50.2935	40.2495	48.3447	62.6905	33.3129	69.6303	58.0261	88.8547	68.2686	36.7346	81.7765
CRLF3	Cytokine receptor-like factor 3	2.59299	3.1958	2.78544	3.4057	3.00751	1.36375	4.19867	2.16003	2.80898	3.61161	2.7366	5.34562	4.41187	8.945	3.40817	8.91405	5.71516
CRLS1	Cardiolipin synthase (CMP-forming);Isoform of Q9UJA2, Isoform 2 of Cardiolipin synthase (CMP-forming)	3.94821	0	3.46093	3.38303	2.76954	0	5.61839	4.31679	0	6.75463	5.96777	3.68127	8.16814	5.60248	2.51664	4.45631	5.55429
CRP	C-reactive protein	0	0	0	0	0	4.85105	4.28561	6.53824	5.36845	9.81073	6.64679	6.57352	3.77418	7.13149	6.47025	9.74036	4.27887
CRPPA	D-ribitol-5-phosphate cytidylyltransferase	2.57989	2.32691	4.28739	4.23649	2.32545	0	2.74734	0	3.21254	5.38024	2.36272	2.89067	2.21627	3.78338	5.6705	0	6.45994
CRTAP	Cartilage-associated protein	0.506175	0.560763	0.39746	0.516662	0.502235	0.468313	0	0	0.157416	0	0.514295	2.74409	1.33267	0.597146	0	0.395071	2.56347
CRTC1	CREB-regulated transcription coactivator 1;Isoform of Q6UUV9, Isoform 2 of CREB-regulated transcription coactivator 1	2.24958	1.93544	2.88997	3.22334	2.49751	1.48708	2.52704	2.19766	2.2251	5.33337	2.13359	2.85495	3.05508	2.98113	4.10507	2.75344	4.00155
CRTC2	CREB-regulated transcription coactivator 2	0.146994	0	0	0	0.234319	0	0	0.586355	0	0	0.217827	0	0.424056	0	0	0	0.61621
CRY2	Isoform of Q49AN0, Isoform 2 of Cryptochrome-2	0	0	27.6562	34.4593	24.8718	21.2587	17.5232	0	33.5466	0	18.785	31.9446	18.1269	25.52	58.3877	0	42.3183
CRYAB	Alpha-crystallin B chain	2931.57	2677.19	3130.35	3968.32	3081.82	3796.08	4363.27	2219.53	3265.49	4294.39	2347.53	5295.39	3178.51	3745.25	3358.31	3560.21	4487.75
CRYBG2	Beta/gamma crystallin domain-containing protein 2	7.64013	0	0	7.13027	6.68662	7.21001	5.36552	0	10.4942	10.1508	5.35441	9.07816	6.18334	5.51163	8.32954	3.53651	11.9903
CRYBG3	Very large A-kinase anchor protein	0.406444	0.260603	0.626171	0.61888	0.431924	0.243689	0.422875	0.429201	0.438984	0.468707	0.634617	0.59662	0.656785	0.534786	0.392393	0.507078	1.0314
CRYL1	Lambda-crystallin homolog	15.8453	16.1949	18.7453	26.2244	15.9774	14.5759	26.6755	17.9086	16.8325	22.5373	21.1403	29.4644	21.5488	28.5286	25.8834	24.4273	26.2318
CRYM	Ketimine reductase mu-crystallin	166.763	34.752	107.521	3.34046	214.49	70.5076	37.6281	7.13117	92.0977	15.992	17.9396	79.6339	35.6224	16.966	28.7489	24.1032	20.9425
CRYZ	Quinone oxidoreductase	8.73777	8.79183	16.8575	17.734	14.3915	22.5442	20.5642	11.6993	15.3338	12.5315	10.366	32.2997	17.751	15.7754	16.9013	10.6335	17.825
CRYZL1	Quinone oxidoreductase-like protein 1	6.00345	5.65561	7.5595	6.56911	5.64816	2.01714	5.90218	2.41635	6.96544	7.10398	2.9021	7.36713	5.30424	5.63353	9.74139	3.64313	8.96868
CS	Citrate synthase, mitochondrial	129.301	125.135	138.897	257.873	178.077	80.8231	181.933	66.8283	61.3407	175.712	61.2931	83.0803	113.324	145.64	206.405	77.2636	178.825
CSDE1	Isoform of O75534, Isoform 4 of Cold shock domain-containing protein E1	61.2634	53.7873	59.237	69.0409	49.6372	83.9143	78.0571	118.621	61.9225	49.0232	128.119	104.64	80.2829	97.2255	26.159	60.5306	114.717
CSE1L	Exportin-2;Isoform of P55060, Isoform 3 of Exportin-2	547.143	455.491	454.039	325.242	434.617	186.739	231.853	155.977	393.685	373.767	195.259	321.143	522.785	358.823	299.31	217.859	473.946
CSK	Tyrosine-protein kinase CSK	3.40409	3.38282	5.51053	4.63454	3.63167	5.2861	4.23167	4.06313	3.57807	5.78364	3.75415	9.64269	6.70383	8.84261	10.3376	3.45362	10.2927
CSNK1A1	Casein kinase I isoform alpha	3.01996	3.60064	3.48332	3.5621	2.37141	2.2974	2.99028	2.8344	2.78836	1.83697	3.90222	4.14379	3.23835	6.504	0	3.43459	6.9523
CSNK1A1L	Casein kinase I isoform alpha-like	1.98336	1.54839	0	0	0	0	0	0	0	0	0	0	0	0	1.35807	0	4.81758
CSNK1D	Casein kinase I isoform delta;Isoform of P48730, Isoform 2 of Casein kinase I isoform delta	2.73276	2.56318	2.70454	2.85434	1.86942	2.20565	1.8924	3.19566	0.704772	0	2.6255	3.32888	2.82633	4.43078	0	0	3.49807
CSNK1G3	Isoform of Q9Y6M4, Isoform 4 of Casein kinase I isoform gamma-3	0	0	0	0.491367	0	0	0	0.22073	0	0	0	0	0	0	0	0	0
CSNK2A1	Casein kinase II subunit alpha	11.855	9.52751	10.0993	9.98174	9.02832	16.5514	14.3421	20.2423	15.3904	10.2566	21.6627	20.3844	15.3152	17.8435	3.71639	14.1018	21.1899
CSNK2A2	Casein kinase II subunit alpha'	5.25897	4.21774	3.95178	7.39446	3.49387	6.63339	6.10256	6.21528	5.67086	5.25535	8.56667	7.99462	6.48818	6.45774	0	7.06765	8.87828
CSNK2B	Casein kinase II subunit beta	15.3109	12.8463	14.1545	15.1045	12.523	18.4857	19.4766	25.6366	18.5587	12.8736	30.7193	28.4904	20.4044	22.1045	4.52503	19.5873	27.614
CSPG4	Chondroitin sulfate proteoglycan 4	7.48688	7.46413	15.4487	11.2152	8.20932	7.97693	9.99107	7.29223	8.43818	5.74383	8.59037	15.1286	14.175	12.6818	4.62297	5.39977	14.2998
CSRP1	Cysteine and glycine-rich protein 1	67.9987	52.2612	164.245	71.4342	34.1041	48.221	106.246	48.0021	18.1656	21.5626	65.6768	140.442	140.031	82.3721	36.8741	45.0376	82.0973
CSRP3	Cysteine and glycine-rich protein 3	479.955	304.986	880.224	408.796	264.428	243.857	394.196	234.456	119.632	136.02	289.809	452.583	227.365	378.164	201.429	102.371	407.126
CST3	Cystatin-C	16.4589	19.6689	19.6469	26.86	20.6161	11.2859	23.0151	17.8263	32.0515	21.1496	25.9903	30.4999	31.2625	27.7064	25.3467	24.9675	48.076
CSTB	Cystatin-B	6.80614	7.13312	6.72966	8.13966	7.22116	6.01223	11.0259	4.96319	2.36727	4.01792	8.21697	9.11587	5.81732	7.38721	3.26829	4.18866	13.2077
CSTF1	Cleavage stimulation factor subunit 1	0	0	0	0.745429	0.471745	0.673497	0.501317	0.609762	0	0	0.467748	0.690237	0.772544	0.464067	0	0	1.10695
CSTF2T	Cleavage stimulation factor subunit 2 tau variant	25.912	22.2936	39.6454	34.3168	22.7356	27.1604	28.4716	32.2226	48.8595	36.4839	31.1898	39.2824	33.5678	34.3701	40.0333	27.1941	45.2615
CTBP1	C-terminal-binding protein 1;Isoform of Q13363, Isoform 2 of C-terminal-binding protein 1	14.669	16.3976	27.089	24.9923	14.9695	18.8989	19.9624	19.1629	24.4934	37.0255	17.1282	28.2617	20.143	26.3015	39.023	11.9255	35.5901
CTBP2	Isoform of P56545, Isoform 2 of C-terminal-binding protein 2	0	1.62697	2.26304	1.53146	0.923649	1.46432	1.03018	2.08094	2.82	1.57943	1.91872	4.34208	2.38794	2.89655	0	1.74653	6.1621
CTDNEP1	CTD nuclear envelope phosphatase 1	4.29537	3.66758	4.36208	7.11715	3.44514	4.21828	4.77983	4.35172	8.40715	9.17913	4.33024	6.89601	4.07214	6.37794	10.0397	10.1292	5.67844
CTDP1	RNA polymerase II subunit A C-terminal domain phosphatase	1.15638	1.63222	1.93105	1.99345	1.50075	1.99773	2.45139	2.86128	1.68519	2.11204	2.9445	3.58095	2.96362	3.14906	1.06861	2.23962	3.8764
CTF1	Cardiotrophin-1	14.9727	12.4274	14.4375	15.403	13.1676	21.629	7.3352	11.6108	15.3904	22.3873	14.8598	10.7127	8.38539	18.2046	9.20282	14.7596	12.922
CTIF	Isoform of O43310, Isoform 2 of CBP80/20-dependent translation initiation factor	3.02901	3.20833	3.33652	4.07386	2.92689	2.68124	4.16689	3.89996	4.55353	4.73153	5.01086	4.72496	3.59603	6.65396	2.10873	4.20703	6.19054
CTNNA1	Catenin alpha-1	8.02603	7.43155	10.3823	9.72313	6.78277	8.02852	9.3975	8.70885	7.82796	8.23951	10.6859	17.1434	10.3115	12.0859	5.04221	8.34017	16.2678
CTNNA2	Isoform of P26232, Isoform 3 of Catenin alpha-2	0.449884	0.368536	0.44401	0.429246	0.450513	0.308913	0	0	0.864667	0.848792	1.57765	0	0.894588	0	0	0	1.11771
CTNNA3	Catenin alpha-3	1.3671	1.31214	1.56817	1.96203	1.39222	2.8697	2.36054	3.55763	2.5778	2.09846	5.08642	3.83882	3.17778	3.13387	0	2.79431	4.56067
CTNNAL1	Alpha-catulin;Isoform of Q9UBT7, Isoform 2 of Alpha-catulin;Isoform of Q9UBT7, Isoform 3 of Alpha-catulin	0.299089	0	0	0	0.167343	0.111336	0.249869	0.207329	0.524866	0.150523	0	0	0.221219	0	0	0.372799	0.34692
CTNNB1	Catenin beta-1	9.05943	7.24235	12.4794	10.6196	8.72985	10.5593	11.8035	11.2813	12.4896	11.4816	15.2761	19.7605	15.9633	14.4804	4.56059	13.3683	19.6575
CTNNBL1	Beta-catenin-like protein 1;Isoform of Q8WYA6, Isoform 4 of Beta-catenin-like protein 1	1.82684	1.39053	1.11299	1.99254	1.43915	3.04674	3.30151	4.25854	2.95086	2.78421	4.79305	3.53996	2.4976	3.7092	0	3.1051	4.03765
CTNND1	Isoform of O60716, Isoform 1AC of Catenin delta-1;Isoform of O60716, Isoform 1A of Catenin delta-1	7.19782	6.33402	8.84694	8.0169	6.6238	7.42054	9.75466	8.01236	7.71878	8.01496	8.3871	13.7784	8.90888	9.45323	3.3398	7.71392	11.3587
CTPS1	CTP synthase 1	17.8444	16.0317	18.7669	22.6155	13.7501	13.5437	20.0222	14.0366	15.8544	18.4078	18.924	28.0865	22.7784	28.6999	18.9855	16.3635	36.8408
CTPS2	CTP synthase 2	4.71521	4.56225	6.75139	6.10529	4.55415	4.70799	5.50316	5.10224	5.92446	6.28929	5.05839	7.52312	5.52488	7.01424	7.45283	4.67278	8.24762
CTRL	Chymotrypsin-like protease CTRL-1	0	0	0	0	0	0	1.04235	1.85379	3.9287	0	2.25378	0	2.51029	3.63899	2.35408	0	0
CTSA	Lysosomal protective protein;Isoform of P10619, Isoform 2 of Lysosomal protective protein	1.06439	1.09164	1.98606	2.46778	1.0409	0.96413	2.33944	0	0	2.49116	0.903674	2.25112	2.52594	1.81669	2.69166	0.801448	3.24809
CTSB	Cathepsin B	9.23211	6.54605	14.5276	11.4342	8.73991	14.3561	24.278	10.2887	13.8086	23.437	12.4684	34.1191	29.0886	20.7005	25.3642	15.7679	27.0165
CTSC	Dipeptidyl peptidase 1	6.38412	6.54605	7.59439	6.88504	7.23447	3.26389	5.88996	4.08282	6.45281	7.65423	5.2205	6.61299	6.32446	7.79615	11.3324	4.78052	13.7793
CTSD	Cathepsin D	14.9245	11.8817	11.089	22.5843	21.3013	46.3378	39.1843	38.9996	43.7873	52.8204	41.4393	34.3952	69.7787	39.0733	17.7755	46.481	21.2192
CTSF	Cathepsin F	0	0	0	0	0	0	0	0	0	0	0	0	0	0.621699	0	0	0
CTSG	Cathepsin G	4.94312	4.67713	10.3871	11.2669	7.61565	4.52518	7.0585	5.84872	11.4301	8.78621	7.60172	18.8234	14.0095	10.1948	4.78433	7.92821	29.7871
CTSL	Procathepsin L;Isoform of P07711, Isoform 2 of Procathepsin L	3.68808	2.78856	6.18861	5.11807	3.32588	2.88626	4.54582	3.19419	5.318	8.03899	2.88345	6.81551	4.61236	5.67519	8.09508	3.4584	8.01362
CTSS	Cathepsin S;Isoform of P25774, Isoform 2 of Cathepsin S	0	0	0	0	0	0	0	0	0	0	0	0	8.10444	0	0	0	0
CTSZ	Cathepsin Z	3.17469	3.33718	4.52682	3.98939	3.97198	2.51267	6.61778	2.14467	3.89716	7.11543	3.24274	7.67888	7.43915	4.94061	7.67222	4.28228	11.067
CTTN	Src substrate cortactin	6.34893	5.72901	7.10384	5.27966	4.33318	4.11942	7.15999	4.79248	2.98847	5.48658	6.07592	11.5478	9.31372	9.60462	5.31644	4.59701	14.0032
CTU2	Cytoplasmic tRNA 2-thiolation protein 2;Isoform of Q2VPK5, Isoform 3 of Cytoplasmic tRNA 2-thiolation protein 2	0	1.25684	1.61285	1.61959	1.19126	0	1.48803	1.25621	1.25791	1.02	2.36326	2.6236	2.38574	2.06006	1.10515	1.35013	0
CUEDC1	CUE domain-containing protein 1	7.17135	6.6417	10.7175	9.69631	7.44572	7.18019	7.50952	9.47023	11.6185	9.6361	9.77939	11.7516	6.66228	11.9945	9.84059	8.55806	13.2017
CUEDC2	CUE domain-containing protein 2	8.35989	8.36141	9.65591	8.99718	8.30437	8.04703	11.6121	10.6405	3.41231	4.28155	10.0187	12.173	12.4487	17.0404	2.64924	4.46247	11.7579
CUL1	Cullin-1	9.25765	6.87511	13.4305	9.96796	7.47321	9.07477	10.205	7.75284	14.0459	13.3937	8.97453	18.4161	8.44546	16.8764	23.1964	9.09652	25.6111
CUL2	Cullin-2;Isoform of Q13617, Isoform 2 of Cullin-2	20.1002	19.0449	17.9347	18.9717	16.6536	14.1558	24.1775	20.6852	22.3846	22.8455	23.2762	27.3589	19.3029	35.5451	15.9743	25.3907	34.3502
CUL3	Cullin-3	24.6377	21.423	22.2379	22.4443	19.4092	22.2554	29.8203	25.8857	33.0102	26.6319	30.5219	35.164	18.396	28.215	33.5754	21.9217	40.4696
CUL4A	Cullin-4A	23.2595	22.9287	21.8571	27.6443	20.4648	27.5636	37.3089	31.4674	30.6654	27.8228	34.2304	45.4358	32.5254	45.0485	21.7081	28.8387	47.5038
CUL4B	Cullin-4B;Isoform of Q13620, Isoform 2 of Cullin-4B	1.70216	1.72496	2.21408	2.00589	1.85356	1.65705	2.48263	1.89217	1.91844	1.3627	1.83194	3.75663	2.5599	3.46801	0.867203	1.15924	4.66583
CUL5	Cullin-5	36.7198	32.9594	34.6971	40.4116	29.2757	34.7725	37.9064	39.8346	43.0079	34.9383	38.9504	53.0393	29.196	50.6151	31.6025	31.051	60.5799
CUL7	Cullin-7;Isoform of Q14999, Isoform 2 of Cullin-7	0	0	0	0	0.148391	0.171134	0.448242	0.211135	0	0.393008	0.102332	0.328396	0.351579	0	1.77673	0	0.379777
CUSTOS	Protein CUSTOS	0	0	0	0	0	0	0	0	0	0	0	0	0.51585	0	0	0	0
CUTA	Protein CutA;Isoform of O60888, Isoform A of Protein CutA;Isoform of O60888, Isoform C of Protein CutA	94.1241	67.9797	116.491	104.522	76.42	13.5843	55.5664	14.0236	6.21082	10.6734	13.2377	73.0463	51.3243	79.9062	15.1259	0	147.818
CUTC	Copper homeostasis protein cutC homolog	57.2929	11.9668	20.8638	16.9241	12.6826	11.0748	8.26822	15.972	28.0316	14.2135	17.0809	14.2626	9.33734	13.6201	31.3055	10.6506	21.1363
CUX1	Isoform of P39880, Protein CASP	0	1.52118	0	0	1.99116	2.21736	0	2.98099	2.79093	3.40018	4.35123	2.94984	3.33828	3.82367	0	2.61683	4.13741
CWC15	Spliceosome-associated protein CWC15 homolog	0	0	0	0.427372	0.149971	1.1234	1.20202	1.47354	0.243472	0	1.33172	0.668033	0.724975	1.3517	0	0.644281	0.995013
CWC27	Spliceosome-associated protein CWC27 homolog;Isoform of Q6UX04, Isoform 2 of Spliceosome-associated protein CWC27 homolog	4.72608	2.74776	5.25041	3.84774	2.26364	2.39682	2.59067	3.40377	1.33675	0.645211	3.65857	7.78391	3.96026	5.11541	0.939985	0.920185	5.31654
CWF19L1	CWF19-like protein 1	4.20921	1.80875	2.22123	3.01305	2.09077	2.04332	0	1.60865	1.41987	2.73465	2.43732	2.98881	2.19646	0	0.887403	1.83517	4.34039
CXorf38	Uncharacterized protein CXorf38	1.6885	1.54803	2.39052	2.02072	1.37628	0	1.16953	0.907947	2.46405	2.26361	0.849986	1.29777	1.66542	1.53349	4.10791	1.29711	1.40517
CYB561	Transmembrane ascorbate-dependent reductase CYB561	0	0	0	0	0	0	0	0	0	0	0	0	0	0	0	0	0
CYB561D2	Transmembrane reductase CYB561D2	13.3322	5.60763	5.75696	11.1534	7.63321	24.1066	14.2729	21.9665	7.05421	6.01176	13.8042	16.1509	21.4103	10.2963	2.17081	11.0988	8.39709
CYB5A	Cytochrome b5;Isoform of P00167, Isoform 2 of Cytochrome b5	12.9509	15.2013	17.6033	22.5791	13.5459	16.6202	22.101	21.7852	12.3012	12.7556	22.0502	29.6687	24.6617	28.3844	10.5153	11.4677	26.1173
CYB5B	Cytochrome b5 type B	35.3672	46.0659	76.5585	56.5075	37.0772	15.518	41.1351	14.4998	4.87695	24.2997	11.6282	51.2387	31.6755	79.594	7.36243	2.4248	80.0071
CYB5R1	NADH-cytochrome b5 reductase 1	646.25	528.42	674.052	685.34	682.035	1111.31	1884.57	1090.84	501.936	780.551	882.088	1175.43	804.124	2137.37	347.553	886.289	986.799
CYB5R3	NADH-cytochrome b5 reductase 3;Isoform of P00387, Isoform 2 of NADH-cytochrome b5 reductase 3;Isoform of P00387, Isoform 3 of NADH-cytochrome b5 reductase 3	944.497	929.136	564.278	1032.3	901.793	3153.09	1160.41	3058.87	1567.29	917.49	2626.71	1461.16	1734.7	1059.69	334.365	1567.38	878.676
CYB5R4	Cytochrome b5 reductase 4	1.50038	1.29772	1.69548	1.7734	2.29513	1.8601	0	1.84103	0	1.19674	2.11403	3.66774	2.13119	2.8733	0	0	3.31306
CYBA	Cytochrome b-245 light chain	3.02553	2.21758	5.57947	5.72672	2.90942	1.7609	4.71968	2.36952	4.3326	4.40151	3.80287	9.8197	5.8725	5.95498	9.827	4.69543	15.1192
CYBB	Cytochrome b-245 heavy chain	3.77225	2.46706	4.71187	4.64843	2.66567	1.98443	4.47211	1.77158	2.99467	2.34424	3.67292	7.87586	4.58694	5.61152	4.66467	2.34517	12.5178
CYBC1	Cytochrome b-245 chaperone 1;Isoform of Q9BQA9, Isoform 2 of Cytochrome b-245 chaperone 1	0.180219	0.137176	0.188059	0	0.279967	0.18405	0	0.186793	0	0	0	0.65388	0.479538	0	0	0	0.374308
CYBRD1	Plasma membrane ascorbate-dependent reductase CYBRD1;Isoform of Q53TN4, Isoform 3 of Plasma membrane ascorbate-dependent reductase CYBRD1	57.2929	28.8655	58.721	86.1601	52.0483	88.3559	33.3974	58.2855	150.366	137.944	101.511	94.6669	84.9226	46.3853	91.6265	174.291	79.8783
CYC1	Cytochrome c1, heme protein, mitochondrial	568.199	550.274	667.564	725.281	450.824	669.94	1578.75	782.818	304.473	598.138	608.012	1354.56	726.814	1288.49	504.686	663.094	1312.59
CYCS	Cytochrome c	504.778	440.737	680.132	572.013	587.093	556.334	1770.97	573.8	136.662	215.279	605.636	739.432	743.572	958.253	171.089	323.724	549.198
CYFIP1	Cytoplasmic FMR1-interacting protein 1	6.19585	5.12601	6.38547	5.66769	5.09926	4.65839	5.52729	5.6684	5.09623	5.68331	7.2847	9.05729	6.96183	7.25906	2.1425	5.20685	10.7778
CYFIP2	Cytoplasmic FMR1-interacting protein 2	0	0.770512	0	0	0.578105	0	0	0	0	0.471087	0.772702	1.25314	1.16553	0	0	0	0
CYGB	Cytoglobin	0.849964	0.49634	1.50554	0.869774	0.760689	0	0.504327	0.390715	0	1.10765	0	1.24422	0.763701	0.930851	4.42406	0	1.3955
CYLD	Ubiquitin carboxyl-terminal hydrolase CYLD;Isoform of Q9NQC7, Isoform 2 of Ubiquitin carboxyl-terminal hydrolase CYLD	14.4811	11.0123	23.6752	22.0804	13.9736	28.0696	27.2152	23.9751	19.2065	20.1466	31.0036	43.1815	58.698	28.1631	11.8774	22.3602	39.0507
CYP20A1	Cytochrome P450 20A1;Isoform of Q6UW02, Isoform 2 of Cytochrome P450 20A1	0	0.900491	1.08316	2.01051	1.20367	0.661814	0.83987	0.286326	0.996664	0.676708	0.756854	1.39219	1.13194	0.996278	0	1.2992	1.60816
CYP27A1	Sterol 26-hydroxylase, mitochondrial	8.10776	5.84897	11.9369	11.8551	8.23962	7.42054	20.6449	8.22736	6.72123	13.788	10.058	17.4702	14.4053	18.6243	7.33029	8.49523	22.492
CYP2J2	Cytochrome P450 2J2	0	0	1.5052	0.492954	0.661465	1.91838	1.17331	2.3931	1.52914	1.95075	2.87748	1.65081	1.29725	2.35766	0	2.67101	2.43013
CYP2U1	Cytochrome P450 2U1	8.65766	7.17099	9.41658	16.4326	9.56769	0	13.8138	15.405	0	0	18.4507	27.7267	19.3207	19.4572	11.2647	7.14126	25.4759
CYP4F11	Cytochrome P450 4F11	0	0	0	0	0	0	0	0	0	0	0	0	0	0	0	0	0
CYP4X1	Cytochrome P450 4X1;Isoform of Q8N118, Isoform 2 of Cytochrome P450 4X1;Isoform of Q8N118, Isoform 3 of Cytochrome P450 4X1	0.806122	0.967563	0.879616	1.27001	0.701467	0.700383	0.531511	0.968859	1.78587	1.09901	1.74065	2.09796	1.34438	0.98442	0	1.01292	3.26008
CYP51A1	Lanosterol 14-alpha demethylase	0	1.78353	2.97504	3.95919	3.2189	6.33338	2.64796	2.93265	1.87348	0.971407	3.74466	7.17461	2.73038	4.13886	0	2.94764	6.45548
CYP7B1	Cytochrome P450 7B1	0	0	1.28675	0	0	0.673963	0	0	0	1.32954	0	1.17679	0.859851	0.587598	2.42785	1.25567	1.29667
CYRIA	CYFIP-related Rac1 interactor A	12.6067	10.0804	8.47214	17.779	15.8346	4.81655	10.7526	5.9506	5.08333	6.3959	8.28346	8.845	7.93274	6.54456	7.67752	7.8682	11.3718
CYRIB	CYFIP-related Rac1 interactor B	7.37056	5.49135	8.26596	10.6907	6.45367	3.07635	6.54353	3.98713	6.88095	10.6955	4.98554	8.65163	4.02646	10.6606	27.3037	3.52919	18.575
CYSTM1	Cysteine-rich and transmembrane domain-containing protein 1	22.5996	11.534	10.1553	19.9483	22.2386	22.9	32.0193	22.1851	12.4379	0	34.2935	19.7969	15.2484	14.7632	0	23.0662	15.993
CYTH1	Cytohesin-1;Isoform of Q15438, Isoform 2 of Cytohesin-1	24.7344	26.7781	31.5786	34.7621	29.9231	20.088	33.6211	31.2652	30.2934	34.6259	29.7312	27.8675	21.6433	45.4653	31.8289	23.9208	41.7281
CYTH2	Cytohesin-2;Isoform of Q99418, Isoform 2 of Cytohesin-2	2.16372	1.4477	1.85949	2.22078	1.66766	1.69721	2.13065	2.0472	2.17595	1.9593	2.27935	2.45583	2.43289	2.21249	1.68858	1.58444	2.66949
CZIB	CXXC motif containing zinc binding protein	62.6471	50.6967	69.3575	80.1874	58.2649	50.2731	49.6949	40.7437	67.5692	84.6061	69.8412	70.2745	41.7756	67.0163	83.6991	54.3469	84.9041
D2HGDH	D-2-hydroxyglutarate dehydrogenase, mitochondrial	3.11101	1.83518	3.13035	5.36298	2.46778	3.34146	6.38134	3.34242	2.97063	8.45282	2.89142	3.92372	3.33137	4.03256	1.84426	4.88175	3.95575
DAAM2	Disheveled-associated activator of morphogenesis 2;Isoform of Q86T65, Isoform 2 of Disheveled-associated activator of morphogenesis 2	0	0.371432	0	0.444535	0	0	0	0	0	0	0	0	0	0.628898	0	0.704653	0
DAB2	Disabled homolog 2;Isoform of P98082, Isoform 3 of Disabled homolog 2	3.99761	5.13191	3.41581	3.50273	5.01888	3.78997	3.6687	2.13285	4.91981	5.12037	3.71973	10.7201	7.34553	4.39319	6.46876	3.33484	13.2932
DAB2IP	Disabled homolog 2-interacting protein;Isoform of Q5VWQ8, Isoform 5 of Disabled homolog 2-interacting protein	0	0	0	0	0	0	0	0.535378	0	0	0.352462	0.523719	0.429856	0	0	0.928058	0
DACT1	Isoform of Q9NYF0, Isoform 2 of Dapper homolog 1	0	0.611335	0	0.470226	0	0.559675	0.434122	0	0	0.736718	0.420351	1.05341	0.705542	1.22287	0	0	0.853746
DAD1	Dolichyl-diphosphooligosaccharide--protein glycosyltransferase subunit DAD1	41.8891	24.2314	24.5806	33.6749	26.7059	90.8523	29.1617	86.6085	29.7268	17.6158	45.0933	46.4941	46.2938	49.6684	7.43569	15.8334	33.6844
DAG1	Dystroglycan 1	16.8733	10.7443	14.1512	15.1952	8.85741	12.3776	8.11357	14.0495	17.412	10.3372	14.2926	20.7729	7.47004	22.7552	9.68102	9.1343	20.5934
DAGLB	Diacylglycerol lipase-beta;Isoform of Q8NCG7, Isoform 4 of Diacylglycerol lipase-beta	0.89413	0.797039	1.03656	1.03492	0.619023	0.825726	0.953262	0.936398	1.42905	1.36114	1.32529	1.33352	1.10414	1.39888	1.18719	1.44469	2.51726
DAP3	28S ribosomal protein S29, mitochondrial;Isoform of P51398, Isoform 2 of 28S ribosomal protein S29, mitochondrial;Isoform of P51398, Isoform 3 of 28S ribosomal protein S29, mitochondrial	7.10887	5.53451	6.25451	8.81467	6.33734	17.3355	21.194	12.077	7.21188	6.70195	13.192	27.8675	16.4219	16.1689	2.03433	9.00482	21.5739
DAPK2	Isoform of Q9UIK4, Isoform 2 of Death-associated protein kinase 2	8.41203	8.1167	9.42092	12.794	9.58974	10.5156	11.6148	15.4725	10.5864	10.3538	16.5201	15.6674	12.3886	14.5942	5.39412	9.03182	17.7594
DARS1	Aspartate--tRNA ligase, cytoplasmic	44.7302	37.2117	39.5087	44.4126	34.1827	43.0265	59.6915	42.3409	51.7546	45.3003	38.4337	85.7626	61.3936	80.8128	29.2969	48.292	100.445
DARS2	Aspartate--tRNA ligase, mitochondrial	7.36717	5.38616	4.36007	5.97869	5.9089	12.1573	27.322	13.956	4.59567	9.6472	10.212	14.6116	14.1391	17.6474	3.83461	10.722	16.597
DAZAP1	DAZ-associated protein 1;Isoform of Q96EP5, Isoform 2 of DAZ-associated protein 1	0	0.75994	0.865951	0.715165	0.347382	0.517173	1.10309	0.604868	0.799371	1.34742	1.06221	0.533455	0.482973	0.902153	1.33912	0.646659	0.630709
DBI	Isoform of P07108, Isoform 5 of Acyl-CoA-binding protein	5.84791	3.4481	6.39725	4.23552	3.18425	4.93669	3.5515	2.49552	11.2189	9.41242	4.92847	9.32391	3.01386	5.78869	25.5518	3.8786	14.9875
DBN1	Drebrin;Isoform of Q16643, Isoform 3 of Drebrin	3.86279	4.46046	4.20623	4.26684	3.21593	3.60193	5.25911	4.43773	4.38075	5.22879	5.91169	14.6622	9.97753	7.64681	4.27879	7.60808	13.8621
DBNDD1	Dysbindin domain-containing protein 1;Isoform of Q9H9R9, Isoform 2 of Dysbindin domain-containing protein 1;Isoform of Q9H9R9, Isoform 3 of Dysbindin domain-containing protein 1	2.69216	3.07453	3.56446	3.0613	1.58346	2.17889	2.30787	1.06773	3.1092	2.4395	2.23827	2.55093	0	1.59801	4.40779	1.67099	2.70538
DBNL	Drebrin-like protein	8.54478	8.19935	10.9772	10.4449	8.26241	5.84165	11.8553	9.69752	10.5962	11.5851	12.5867	13.3137	21.6483	15.1768	10.2005	13.4022	16.8356
DBNL	Isoform of Q9UJU6, Isoform 6 of Drebrin-like protein	3.79928	2.41479	3.36816	4.1496	2.87943	2.60457	3.04658	3.33934	2.18448	6.59783	2.07402	5.30638	5.0807	3.89924	3.99872	4.57799	5.70727
DBR1	Lariat debranching enzyme	1.02047	0.877969	1.19314	1.32711	0.805206	0.948278	1.10386	1.51901	1.07263	1.33845	1.66614	1.51669	1.32991	1.81001	1.32807	0.880796	2.02922
DBT	Lipoamide acyltransferase component of branched-chain alpha-keto acid dehydrogenase complex, mitochondrial	18.8409	11.5075	8.33668	17.0414	15.115	41.1468	58.981	25.2616	15.6188	20.0679	29.656	37.5663	36.3767	28.3714	2.72911	21.3096	36.6293
DCAF1	DDB1- and CUL4-associated factor 1;Isoform of Q9Y4B6, Isoform 2 of DDB1- and CUL4-associated factor 1	0.359336	0.315485	0	0.359092	0.26522	0.971037	0.964966	1.79705	1.1966	0.544254	1.949	1.59955	1.08999	1.74615	0	0.890174	1.72754
DCAF10	DDB1- and CUL4-associated factor 10;Isoform of Q5QP82, Isoform 2 of DDB1- and CUL4-associated factor 10	0	0.863534	0.731633	0	0.695996	0	0	0.599185	0	0	0	0.903854	0.666689	0.942281	0	0	0.804876
DCAF11	DDB1- and CUL4-associated factor 11	6.94226	6.24567	7.54385	8.66376	6.60704	8.67433	17.0928	9.21214	8.58912	7.51972	10.8047	16.7416	13.7222	19.2123	5.78523	8.85269	19.7028
DCAF5	DDB1- and CUL4-associated factor 5;Isoform of Q96JK2, Isoform 3 of DDB1- and CUL4-associated factor 5	0	0	0	0	0	0	0	0.158183	0	0	0.484632	0.421792	0	0.449242	0	0	0.471442
DCAF6	Isoform of Q58WW2, Isoform 3 of DDB1- and CUL4-associated factor 6	61.5887	66.188	59.0464	79.2148	49.1481	74.5136	79.5266	103.935	77.2411	65.3283	90.2219	124.165	83.8732	131.668	68.3472	76.0808	130.175
DCAF7	DDB1- and CUL4-associated factor 7	3.42768	3.22611	3.76871	5.17019	3.12397	4.39578	5.95405	5.22349	3.97602	2.66319	4.59951	7.19943	4.90708	6.84826	2.55224	4.01675	7.87279
DCAF8	Isoform of Q5TAQ9, Isoform 2 of DDB1- and CUL4-associated factor 8	0	2.74334	0.981506	2.10575	0	1.45793	0	1.85635	0	0.155275	0	3.61325	0.767756	1.41932	0	0	5.2448
DCAF8	DDB1- and CUL4-associated factor 8	2.23049	2.1701	3.22696	3.21297	1.54706	2.21736	3.50681	2.67584	1.11802	2.07301	4.16977	6.3782	2.8895	4.68576	2.64132	1.47528	7.78805
DCAKD	Dephospho-CoA kinase domain-containing protein	1.8497	1.43674	2.61633	1.97836	1.5004	2.38911	6.23465	2.38265	1.93397	3.82914	2.86096	5.1168	3.85055	4.49242	2.42338	3.52838	2.97803
DCD	Dermcidin	2.60376	3.66842	6.62206	3.84066	7.62969	1.9554	2.30416	2.82072	17.6177	15.0835	2.37089	17.5185	1.41164	0	4.19779	3.34792	21.9194
DCHS1	Protocadherin-16	0.810963	0.60573	1.0337	1.5357	1.00857	0.788199	1.25491	1.25939	0.847322	1.21619	1.12257	1.82893	1.89114	2.07196	1.40385	1.30249	2.58065
DCK	Deoxycytidine kinase	1.86381	1.34147	2.07919	2.84843	1.3089	2.40844	4.31134	2.00244	1.36442	1.26795	2.26784	3.84148	2.38025	2.43995	0.857869	1.06433	3.4684
DCLK1	Serine/threonine-protein kinase DCLK1	4.71195	7.15615	5.81692	9.39953	2.74984	4.15658	7.00345	4.85133	7.63218	6.99361	4.4403	28.0284	43.9565	5.62057	10.2311	16.3371	19.1526
DCN	Decorin	280.479	383.071	389.756	359.92	365.18	306.363	257.936	237.662	415.574	387.884	407.298	417.252	302.917	345.367	253.233	296.398	536.944
DCP1A	mRNA-decapping enzyme 1A;Isoform of Q9NPI6, Isoform 2 of mRNA-decapping enzyme 1A	1.65959	1.62547	1.78358	1.95887	1.1156	1.67315	1.7499	1.57965	2.32782	1.61102	1.98798	3.00953	2.06074	2.71569	1.5496	1.86327	3.89788
DCP1B	mRNA-decapping enzyme 1B;Isoform of Q8IZD4, Isoform 2 of mRNA-decapping enzyme 1B	0	0	0	0	0	0.368753	0	0.320524	0	0	0	0	0.491953	0	0	0	0
DCPS	m7GpppX diphosphatase	11.3162	12.4704	20.123	17.0022	10.7673	2.74622	11.5828	3.10356	16.6513	24.7686	2.53987	13.1099	8.51968	13.9341	33.4442	3.79206	20.9908
DCTN1	Dynactin subunit 1;Isoform of Q14203, Isoform 6 of Dynactin subunit 1	23.6266	21.3934	23.4743	23.4642	19.6611	30.0979	34.4518	34.1398	34.4071	28.2424	35.7447	49.9112	39.639	44.7281	13.2654	33.6105	54.7178
DCTN2	Dynactin subunit 2;Isoform of Q13561, Isoform 2 of Dynactin subunit 2;Isoform of Q13561, Isoform 3 of Dynactin subunit 2	38.8777	36.2727	41.792	41.2863	32.4046	43.9173	51.8576	46.0533	58.4856	55.2843	49.4438	78.7042	61.8761	71.4135	33.0538	58.8132	84.5529
DCTN3	Dynactin subunit 3	13.2617	12.7638	15.0001	13.3354	11.4132	15.7774	18.4507	16.7402	21.6994	20.3799	16.0477	27.3526	21.3021	22.4378	12.2186	21.1532	27.908
DCTN4	Dynactin subunit 4	6.08696	5.46612	5.82228	6.87237	4.94432	7.42738	8.62605	8.05305	8.79121	8.26421	8.92713	13.474	9.43025	11.2896	4.50942	8.60548	13.9357
DCTN5	Dynactin subunit 5;Isoform of Q9BTE1, Isoform 2 of Dynactin subunit 5	4.51961	4.43588	3.93906	4.27274	2.98131	5.22078	7.16823	7.10985	7.64625	5.50176	7.62275	9.88321	8.52164	8.68921	3.50527	6.59744	11.2675
DCTN6	Dynactin subunit 6	6.47442	6.58233	4.70645	9.24924	6.03402	7.21998	9.02219	8.13131	6.94622	6.02284	8.07443	10.7077	8.33342	11.2974	5.19782	8.05518	15.7119
DCTPP1	dCTP pyrophosphatase 1	27.0645	19.7142	45.3621	28.5895	32.5092	32.1689	42.7181	33.7179	34.3517	50.1997	15.7439	46.0573	36.3851	43.3391	53.2011	38.7771	40.2929
DCUN1D1	DCN1-like protein 1	16.9981	17.4856	20.1369	17.7544	15.1498	15.8575	20.7784	20.3733	19.854	17.9267	24.3732	30.7396	20.6597	36.1394	28.2177	26.9758	36.8747
DCUN1D2	DCN1-like protein 2	9.87872	8.78576	6.59771	8.95584	6.08985	11.3956	9.10568	17.2608	14.6537	12.2152	15.8311	12.7643	6.14219	17.0601	8.9376	12.1137	12.7917
DCUN1D5	DCN1-like protein 5	0	4.55805	5.63499	6.37392	4.9375	11.6342	14.666	8.77527	5.44062	2.98883	0	9.08026	7.65109	10.6876	0	0	0
DCXR	L-xylulose reductase	197.424	192.655	393.906	316.378	335.743	226.483	404.401	274.764	196.539	353.103	197.202	323.965	320.201	517.226	295.475	224.427	300.42
DDA1	DET1- and DDB1-associated protein 1	0.614187	1.19064	0	0.51488	0	0.592974	1.3192	1.48512	0.671504	0	0.872794	1.08667	0.952847	1.48245	0	0.764848	1.18067
DDAH1	N(G),N(G)-dimethylarginine dimethylaminohydrolase 1	27.271	17.5582	37.23	22.1925	12.9899	4.43033	6.37107	9.0232	18.1029	16.8811	5.92669	12.7262	7.16842	22.7447	89.4172	8.87514	27.0975
DDAH2	N(G),N(G)-dimethylarginine dimethylaminohydrolase 2	9.95866	14.1507	18.4499	13.4031	12.6214	4.01824	7.89064	4.99529	8.72868	13.5863	5.21809	14.6993	8.75232	8.73736	14.349	9.61779	15.2732
DDB1	DNA damage-binding protein 1	114.367	106.507	120.779	133.723	94.7779	112.937	140.35	139.175	121.969	121.479	143.487	187.801	145.654	205.013	130.293	121.332	210.295
DDHD2	Phospholipase DDHD2	2.88072	3.37349	4.93507	5.0969	3.17692	4.35849	6.04661	4.65437	6.03043	6.37531	5.03051	8.34061	5.88333	8.12232	5.11353	7.03518	8.12323
DDI1	Protein DDI1 homolog 1	1.08418	0	1.03037	0	1.19401	0.315817	0	0.694321	1.28958	1.97834	0	3.16299	2.53585	0	2.06596	7.70859	0
DDI2	Protein DDI1 homolog 2;Isoform of Q5TDH0, Isoform 3 of Protein DDI1 homolog 2	8.87362	13.1577	12.9447	15.3252	10.8021	3.39575	19.8113	4.67908	8.67458	10.9346	6.68055	16.4172	17.423	36.0645	24.7811	28.8985	22.6793
DDOST	Dolichyl-diphosphooligosaccharide--protein glycosyltransferase 48 kDa subunit	40.439	30.3026	36.5168	35.8432	31.5578	31.9401	36.5858	36.0214	26.3359	33.0675	29.4722	69.0555	56.263	46.7068	14.751	21.7658	65.5283
DDR2	Discoidin domain-containing receptor 2	1.3671	1.40178	2.2356	1.88498	1.37565	1.32415	1.68893	1.54476	2.16745	2.486	2.64066	3.69231	2.32286	2.40038	2.01336	2.08054	3.60935
DDRGK1	DDRGK domain-containing protein 1	5.2869	4.22162	6.53271	7.17639	5.22766	8.1571	8.09305	8.81578	8.03801	6.48189	6.78128	11.9949	7.41179	11.89	2.59013	8.60746	10.4744
DDT	D-dopachrome decarboxylase	0	0	0	0	3.18278	1.04288	1.3459	0	0	1.49108	1.62822	1.19894	1.06936	1.36987	14.4684	0	0
DDX1	ATP-dependent RNA helicase DDX1	22.075	18.1585	28.6479	24.7347	17.3503	30.4464	24.3171	33.0187	33.5234	22.3101	32.5021	44.8021	26.3223	36.2393	16.0554	22.7654	47.2747
DDX17	Probable ATP-dependent RNA helicase DDX17	6.12916	6.12603	8.99691	9.26416	4.91029	14.1917	18.3659	19.0003	11.7449	11.2642	15.2234	19.5929	10.9351	20.09	7.20478	12.499	18.4726
DDX18	ATP-dependent RNA helicase DDX18	0	0	0	0	0	0	0	0	0	0	0	0	0	0	0	0	0
DDX19A	ATP-dependent RNA helicase DDX19A	9.01365	14.6953	16.121	14.4613	9.94047	17.1765	12.2776	19.6092	23.0594	25.8108	9.18992	23.5179	21.9494	19.4617	33.0995	18.1667	21.46
DDX19B	ATP-dependent RNA helicase DDX19B	61.024	64.7559	78.0177	75.25	57.2937	85.6911	59.5679	87.8134	67.8498	74.046	60.3965	118.14	84.3574	114.309	95.0432	49.8397	118.23
DDX20	Probable ATP-dependent RNA helicase DDX20	0	0	0	0	0	0.807859	0	0	0	0	0	1.14709	0	0	0	0	0
DDX21	Nucleolar RNA helicase 2	2.7977	0	0	0	0	0	85.1358	0	0	0	55.1457	6.40764	0	0	0	0	0
DDX23	Probable ATP-dependent RNA helicase DDX23	0	0	0	0	0	1.62456	0	2.20425	1.79287	0	2.44293	3.55466	0	0	1.19652	2.21195	0
DDX24	ATP-dependent RNA helicase DDX24	0	0	0	0	0	0	0	2.14961	0	0	0	0	0	5.5307	0	0	0
DDX28	Probable ATP-dependent RNA helicase DDX28	1.75429	1.64922	0.825264	2.30784	1.68348	2.88626	3.89235	2.91582	1.67051	1.47673	3.11252	4.25989	3.1873	4.49967	0	1.90185	4.73401
DDX39A	ATP-dependent RNA helicase DDX39A	2.61036	2.7301	3.3496	3.66696	2.45758	4.50646	5.80513	4.67155	3.44865	4.3924	4.12014	4.97162	3.46676	9.1281	3.00553	3.61639	5.57864
DDX39B	Spliceosome RNA helicase DDX39B	17.0373	20.4258	34.7531	24.0274	16.0549	23.5037	21.6776	19.777	20.547	29.799	18.9283	27.5105	22.0812	29.5311	21.6382	19.7777	26.6335
DDX3X	ATP-dependent RNA helicase DDX3X;Isoform of O00571, Isoform 2 of ATP-dependent RNA helicase DDX3X	21.717	18.6157	19.9202	18.4462	15.3889	18.2069	26.9968	33.6094	21.8499	14.4511	24.4012	29.6277	21.5587	34.0314	13.2654	25.5256	31.6759
DDX3Y	ATP-dependent RNA helicase DDX3Y;Isoform of O15523, Isoform 2 of ATP-dependent RNA helicase DDX3Y	0	0	1.81006	2.00081	0	2.20108	3.78192	0	2.95154	4.46582	2.65101	4.36112	3.0014	0	1.46292	2.1241	4.41295
DDX42	ATP-dependent RNA helicase DDX42	4.61637	3.4752	4.49669	4.97515	3.73772	4.39477	4.63673	6.5775	6.16948	5.30275	4.78753	8.00936	5.69145	6.76831	4.03479	4.09331	7.79882
DDX46	Isoform of Q7L014, RNA helicase	0	0	0	0	0	0	2.27831	2.20121	0	0	0	0	0	2.19372	0	0	0
DDX46	Probable ATP-dependent RNA helicase DDX46	5.45885	3.42199	5.61685	4.32919	3.56703	6.97486	9.59428	9.46151	6.75692	6.23019	9.55459	9.1685	7.19653	9.9536	0	8.2106	7.71132
DDX47	Probable ATP-dependent RNA helicase DDX47;Isoform of Q9H0S4, Isoform 2 of Probable ATP-dependent RNA helicase DDX47	0	0	0	0	0	0	0	0.627857	0	0	0.504443	0	0	0	0	0	0
DDX5	Probable ATP-dependent RNA helicase DDX5	1.48081	0	0	0.59842	1.25345	2.324	1.9825	3.03501	1.7937	1.40185	3.0117	3.12031	1.45052	2.22731	0	1.13782	2.84858
DDX50	ATP-dependent RNA helicase DDX50	0.924061	0	0	0	0	1.0773	0	1.94877	0	0.598138	0	1.73979	1.1946	0	1.55568	0.574877	3.45405
DDX54	ATP-dependent RNA helicase DDX54;Isoform of Q8TDD1, Isoform 2 of ATP-dependent RNA helicase DDX54	0	0	0	0	0	0	0	0	0	0	0	0	0	0	0	0	0
DDX56	Probable ATP-dependent RNA helicase DDX56;Isoform of Q9NY93, Isoform 2 of Probable ATP-dependent RNA helicase DDX56	0	0.234196	0	0.321741	0.26891	0.614803	0.521209	0.936614	0.754308	0.439543	0.949974	0.634013	0.511945	0.4314	0	0.699641	0.662871
DDX58	Antiviral innate immune response receptor RIG-I	4.3934	4.88854	6.05053	6.63906	4.3093	5.65895	5.51077	5.54065	4.71139	5.74118	5.7018	10.7497	6.61185	8.19937	5.6043	5.18293	9.72364
DDX59	Probable ATP-dependent RNA helicase DDX59;Isoform of Q5T1V6, Isoform 2 of Probable ATP-dependent RNA helicase DDX59	3.3037	4.40534	2.58877	2.17123	2.72776	3.75004	4.10688	5.43702	0	0	4.30836	6.72509	3.24357	7.79256	0	3.94253	6.38453
DDX6	Probable ATP-dependent RNA helicase DDX6	6.57962	6.08947	5.73711	8.34461	6.04097	10.7235	8.50574	13.3401	10.3359	9.90379	12.3627	12.0475	7.77541	13.0611	7.36751	9.30412	12.692
DECR1	2,4-dienoyl-CoA reductase [(3E)-enoyl-CoA-producing], mitochondrial;Isoform of Q16698, Isoform 2 of 2,4-dienoyl-CoA reductase [(3E)-enoyl-CoA-producing], mitochondrial	104.593	91.8078	54.6001	107.747	96.2514	134.659	223.621	180.951	151.164	163.043	197.793	186.895	249.071	186.931	54.4153	145.605	232.343
DECR2	Peroxisomal 2,4-dienoyl-CoA reductase [(3E)-enoyl-CoA-producing]	0	2.41257	0	0	0	2.42234	3.43805	2.58857	1.2757	0	1.48974	3.06477	0	0	0	0	1.66352
DEFA1B	Neutrophil defensin 1;Neutrophil defensin 3	27.4032	51.9134	43.3903	46.3134	57.5449	20.2925	92.8351	30.1551	18.4948	33.3658	65.1646	54.125	44.6913	109.089	42.2494	125.336	76.5295
DEGS1	Sphingolipid delta(4)-desaturase DES1	12.7204	7.99244	5.82496	10.1159	10.887	14.4756	8.09678	21.2942	8.73874	9.12224	18.8153	10.452	15.1434	9.5627	3.51011	13.8221	8.96043
DEK	Protein DEK	6.7143	6.28028	5.43742	9.16445	5.42884	10.3213	11.187	12.6929	7.80097	4.01237	14.8529	12.838	8.61238	12.0332	7.35396	10.5578	11.8749
DENND10	DENN domain-containing protein 10;Isoform of Q8TCE6, Isoform 2 of DENN domain-containing protein 10	2.78741	3.11659	3.32808	3.88872	2.75237	3.50296	4.32925	2.07951	4.43863	4.78742	3.0684	6.8265	3.10187	6.72482	3.72495	3.2083	5.84425
DENND1B	DENN domain-containing protein 1B	0	0	0.207297	0.407949	0.380283	0.498581	0.571232	0.309856	0.15497	0.297715	0.491261	0.383971	0.411835	0.516036	0.222598	0.293816	0
DENND3	Isoform of A2RUS2, DENN domain-containing protein 3;Isoform of A2RUS2, DENN domain-containing protein 3	0	0.162547	0.412661	0.633587	0	0.191133	0	0.259335	0	0	0	0.414284	0.651363	0	0	0	0.514907
DENND4B	DENN domain-containing protein 4B	1.26387	1.18026	1.55989	2.09849	1.63911	2.14999	2.28777	2.68201	1.72961	1.49831	2.4895	2.67423	2.01801	2.75474	0	2.01918	3.04039
DENND4C	DENN domain-containing protein 4C	2.45415	2.97152	4.46882	3.58432	2.34967	3.02856	3.6142	3.58229	2.76853	2.66441	3.46746	4.97162	4.09754	4.9066	3.3069	2.69821	6.78779
DENR	Density-regulated protein	61.3198	44.2975	68.5004	65.4194	57.4522	66.1052	66.8363	69.1768	66.5807	59.1564	70.3092	82.7938	51.7158	69.6595	42.3176	41.675	73.5409
DEPTOR	DEP domain-containing mTOR-interacting protein	62.5462	36.6251	69.9187	54.6646	54.3634	46.2632	33.4744	48.726	53.2413	67.0813	46.915	65.4784	39.767	60.2532	59.1999	59.3028	65.4679
DERA	Deoxyribose-phosphate aldolase	3.91112	4.72693	7.30118	5.79304	6.40335	3.13066	6.111	4.24092	5.2887	7.2946	4.25708	8.29465	2.89683	7.7514	18.3029	7.75667	12.0207
DERL1	Derlin-1;Isoform of Q9BUN8, Isoform 2 of Derlin-1	5.01534	6.28028	11.2874	7.65255	6.16747	12.3747	10.2686	9.49862	5.01243	5.21917	7.7057	16.2442	8.60049	14.1117	3.66118	4.7171	11.0364
DES	Desmin	74.4219	62.3131	66.972	117.546	62.3745	81.3085	88.0262	102.863	111.493	91.3064	90.9101	113.501	76.7049	120.637	48.6879	94.4877	176.86
DGAT1	Diacylglycerol O-acyltransferase 1	1.83908	1.50134	1.52298	1.87071	1.26534	2.04332	1.86428	2.46128	1.42872	1.03849	1.92093	2.76057	1.64219	3.08021	0	1.67023	2.98971
DGCR6	Protein DGCR6	1.17842	1.83687	0	2.00035	3.13911	2.27267	3.18502	2.35755	1.81196	0.684544	4.02543	3.07396	3.19833	3.01912	0	0.640288	3.27136
DGKA	Diacylglycerol kinase alpha	0	0	0	0	0	0	0	0	0	0	0	2.32969	0	1.80003	0	0	0
DGKZ	Isoform of Q13574, Isoform 2 of Diacylglycerol kinase zeta	2.75995	2.14378	5.63629	5.6054	1.8408	2.43409	7.01152	2.1516	3.78747	3.6813	3.73089	6.64046	3.05508	7.6222	4.78763	4.62568	12.6278
DGLUCY	Isoform of Q7Z3D6, Isoform 2 of D-glutamate cyclase, mitochondrial	12.5574	28.5877	46.376	56.9123	21.106	1.88858	3.47946	10.3195	12.5675	1.77706	18.5017	5.12741	3.81965	31.936	64.065	1.91635	64.2878
DGUOK	Deoxyguanosine kinase, mitochondrial	1.40735	1.9261	1.47738	2.79194	1.91826	1.19629	2.88478	2.52325	0	2.9799	2.25794	1.72067	1.66197	3.96717	1.95084	1.00133	3.14941
DHCR24	Delta(24)-sterol reductase	5.51951	4.57066	3.64664	6.23744	4.02631	4.88243	5.78512	3.97888	4.76046	3.14776	4.84409	5.58082	1.91612	4.26266	0.773786	3.01145	5.03186
DHCR7	7-dehydrocholesterol reductase	3.97284	2.73892	2.76754	3.95281	2.92285	4.82432	5.40396	4.42854	2.66839	2.63149	3.52218	8.95773	4.63578	6.28175	0	3.05897	5.94468
DHODH	Dihydroorotate dehydrogenase (quinone), mitochondrial	42.8352	37.2717	59.992	101.253	106.809	298.151	319.972	227.227	16.4759	46.3128	222.952	146.858	248.555	146.043	8.0616	52.3209	80.3579
DHPS	Deoxyhypusine synthase	55.3606	42.9813	78.5404	77.4295	69.9853	50.2037	72.1294	56.5797	82.8035	98.0396	61.647	89.6392	55.1726	87.6356	124.171	62.7878	107.357
DHRS1	Dehydrogenase/reductase SDR family member 1	7.95977	4.03162	4.97271	12.8324	10.6	3.63275	9.26429	6.85268	6.83831	6.65275	6.88037	6.52827	13.4562	21.3442	8.18128	10.4058	9.64559
DHRS11	Dehydrogenase/reductase SDR family member 11	2.55388	2.95243	5.01988	2.84319	2.02865	1.30207	3.23677	1.73365	1.90348	4.2855	1.44548	3.15935	1.36812	4.17331	9.79312	3.23873	3.37154
DHRS3	Short-chain dehydrogenase/reductase 3	1.72584	0	0	0	2.00866	0	2.3228	0	0	0	0	1.95433	6.07608	0	0	0	2.60813
DHRS4	Dehydrogenase/reductase SDR family member 4	3.99945	5.33678	4.82495	15.2513	6.91364	3.67566	13.7979	6.35712	3.62784	6.05204	11.2775	9.63159	8.59851	17.0208	9.48246	7.43661	14.9599
DHRS4L2	Dehydrogenase/reductase SDR family member 4-like 2	5.06758	5.9358	8.16194	8.06318	9.24926	6.65328	3.36134	4.82793	11.1109	10.1789	9.99567	3.59251	2.36932	2.41646	2.99448	6.4014	3.57132
DHRS7	Dehydrogenase/reductase SDR family member 7;Isoform of Q9Y394, Isoform 2 of Dehydrogenase/reductase SDR family member 7	461	394.529	365.168	386.195	612.219	498.007	690.418	436.476	325.723	497.166	493.301	546.762	2167.32	652.65	224.968	552.427	699.727
DHRS7B	Dehydrogenase/reductase SDR family member 7B	55.4244	28.7925	35.6856	55.6296	55.5401	278.25	54.1143	158.183	64.2612	20.4928	128.888	80.5375	43.8049	105.847	10.4357	37.9119	52.5205
DHRS7C	Dehydrogenase/reductase SDR family member 7C;Isoform of A6NNS2, Isoform 2 of Dehydrogenase/reductase SDR family member 7C	80.4824	45.1315	40.0491	80.6132	81.6407	391.594	74.6814	217.601	55.9434	27.3528	220.756	121.955	60.7747	133.5	12.7269	42.2644	67.5505
DHRSX	Dehydrogenase/reductase SDR family member on chromosome X	3.45781	0	0	2.79001	0	3.36152	7.62276	0	0	9.22787	3.76454	5.27713	6.56331	2.77703	0	3.1672	5.0365
DHTKD1	2-oxoadipate dehydrogenase complex component E1	11.0612	6.74185	17.0959	10.1767	7.96539	27.3865	32.6672	18.9348	9.52903	9.33257	12.9125	30.2829	11.3142	26.8275	7.64049	9.33846	19.4415
DHX15	ATP-dependent RNA helicase DHX15	6.93108	6.48753	9.66703	8.13591	6.4999	8.21175	9.58986	10.372	8.18368	10.4979	10.6026	11.9867	10.4526	12.8464	7.12067	8.30377	12.7799
DHX16	Pre-mRNA-splicing factor ATP-dependent RNA helicase DHX16	23.0463	20.4258	24.66	28.3143	18.4632	29.2776	48.968	33.1101	20.5045	23.2007	28.1457	43.6614	40.7871	48.5155	13.5152	28.1174	40.9571
DHX29	ATP-dependent RNA helicase DHX29	1.43186	0.941411	1.58779	1.78446	0.816783	0.579476	4.59634	2.0154	1.7348	0	1.38999	2.4877	1.04646	2.28497	2.09807	1.1751	2.94258
DHX30	ATP-dependent RNA helicase DHX30;Isoform of Q7L2E3, Isoform 2 of ATP-dependent RNA helicase DHX30;Isoform of Q7L2E3, Isoform 3 of ATP-dependent RNA helicase DHX30	0	1.0141	1.85436	0	0	1.53016	1.74266	1.72608	1.38372	1.51182	1.53501	2.67238	1.9603	2.24792	0	1.32396	3.02224
DHX32	Putative pre-mRNA-splicing factor ATP-dependent RNA helicase DHX32;Isoform of Q7L7V1, Isoform 2 of Putative pre-mRNA-splicing factor ATP-dependent RNA helicase DHX32	0.815269	1.09794	1.19205	0.775365	1.27558	1.31564	1.694	1.51447	1.04604	1.03134	2.4895	2.33667	2.36224	1.81836	0	1.34982	2.54407
DHX36	ATP-dependent DNA/RNA helicase DHX36	0.612634	0.421094	0.457186	0.682191	0.333816	1.09379	0.734365	1.30185	0.462113	0.636651	1.34931	1.3219	1.30024	1.38605	0.36891	0.575805	1.53084
DHX37	Probable ATP-dependent RNA helicase DHX37	1.65082	0	0	0	0	6.11133	0	0	0	0	0	0	0	0	0	0	0
DHX38	Pre-mRNA-splicing factor ATP-dependent RNA helicase PRP16	0	0	2.55442	2.40606	2.17174	2.33741	2.8881	3.72787	2.3991	2.91542	3.11109	3.75144	2.79978	2.11729	0	1.9628	3.16394
DHX8	ATP-dependent RNA helicase DHX8	0	0	0	0	0	0	4.50414	0	0	0	0	0	0	0	0	0	0
DHX9	ATP-dependent RNA helicase A	12.6357	14.457	12.5717	9.96108	8.14155	25.4939	29.3233	36.8435	20.7754	16.5007	32.0783	32.0921	17.7551	29.9282	8.02456	21.4129	32.4959
DIABLO	Diablo IAP-binding mitochondrial protein;Isoform of Q9NR28, Isoform 2 of Diablo IAP-binding mitochondrial protein	32.048	27.751	42.9629	54.652	37.4893	37.2165	74.888	43.4371	46.2646	67.4996	38.6467	60.7852	47.7115	85.8777	32.3609	49.0202	58.4559
DIAPH1	Isoform of O60610, Protein diaphanous homolog 1	0	0	1.70684	1.41679	0	0	1.73665	1.72608	0	0	1.66346	1.19481	1.51853	1.65303	0	0	2.09184
DIAPH1	Protein diaphanous homolog 1	15.9294	14.648	27.9894	21.538	16.7458	17.232	28.5438	22.0425	22.2356	22.0395	26.6939	37.7136	29.9105	37.956	20.1707	31.295	40.8911
DIAPH2	Isoform of O60879, Isoform 2 of Protein diaphanous homolog 2	8.27372	7.26406	7.7552	7.22281	6.32713	4.32649	9.28565	8.50865	7.81355	8.08726	9.92686	10.4737	8.66011	9.68234	5.37305	8.50502	14.5891
DICER1	Endoribonuclease Dicer;Isoform of Q9UPY3, Isoform 2 of Endoribonuclease Dicer	0	0.128345	0	0	0.110435	0	0	0	0	0	0	0	1.18966	0	0	0	0.269978
DIO2	Type II iodothyronine deiodinase	10.932	8.88136	14.4842	12.7352	8.99098	10.9632	11.0742	7.77429	9.65047	17.8526	7.84715	26.3571	17.9276	13.6641	24.5483	12.6583	30.7488
DIP2A	Disco-interacting protein 2 homolog A;Isoform of Q14689, Isoform 6 of Disco-interacting protein 2 homolog A	0	0	0	0	0	0.442829	0	0.369965	0	0	0	0	0	0	0	0	0.704091
DIP2B	Disco-interacting protein 2 homolog B	0.885933	0.630201	1.34058	0.827764	0.371199	0	0.42307	0.938989	0	0.775	0	0.637379	0.524232	0.786467	0	0.728073	0.87605
DIP2C	Isoform of Q9Y2E4, Disco-interacting protein 2 homolog C	0.897017	0	0.610651	0	0	0.551742	1.10844	1.02202	0	0	0.816793	0.64476	0	0.910291	0	0	0.943037
DIP2C	Disco-interacting protein 2 homolog C	5.03154	5.06034	6.86741	5.38774	3.5189	4.21149	5.84134	5.04848	4.5735	3.60912	4.02357	7.61199	4.27389	8.09805	4.15165	3.10152	7.49081
DIPK2A	Divergent protein kinase domain 2A	0	0	0	0	0	1.31837	1.63913	0.757287	0.447145	0	0	1.61249	1.22215	0	0	0	1.04167
DIS3	Exosome complex exonuclease RRP44	0.690241	0.418484	0	1.154	0.70179	1.14087	0.833513	1.18457	0.735612	0.778218	1.20673	2.51825	1.39003	1.47462	0.987691	0.644577	1.18968
DIS3L2	DIS3-like exonuclease 2	4.92721	4.96112	7.55428	7.4818	4.99467	6.90297	6.75324	7.0317	4.77253	5.37405	7.75018	10.0739	7.51317	10.2608	5.92681	5.67381	10.9731
DKC1	H/ACA ribonucleoprotein complex subunit DKC1	2.32114	1.73133	2.56976	1.77626	1.3431	2.24303	2.83408	2.62338	2.61968	3.86013	2.68789	3.01924	2.40449	3.03445	17.8863	0	3.67645
DLAT	Dihydrolipoyllysine-residue acetyltransferase component of pyruvate dehydrogenase complex, mitochondrial	310.6	196.462	233.611	339.083	251.308	400.162	415.731	383.231	163.964	263.088	301.101	521.312	284.265	592.762	143.49	270.567	439.874
DLC1	Rho GTPase-activating protein 7	0	0	0	0	0	0	0	0	0	0	0.641523	0	0	1.27521	0	0	1.38334
DLD	Dihydrolipoyl dehydrogenase, mitochondrial	84.0235	61.2039	56.2591	148.186	84.8022	163.884	231.16	122.253	20.9773	53.1375	129.423	213.844	136.403	221.554	16.5852	24.478	185.664
DLG1	Disks large homolog 1;Isoform of Q12959, Isoform 2 of Disks large homolog 1;Isoform of Q12959, Isoform 3 of Disks large homolog 1;Isoform of Q12959, Isoform 4 of Disks large homolog 1;Isoform of Q12959, Isoform 5 of Disks large homolog 1;Isoform of Q12959, Isoform 6 of Disks large homolog 1;Isoform of Q12959, Isoform 7 of Disks large homolog 1	5.47773	3.0717	4.15425	3.20705	3.30603	3.69859	5.83327	7.43808	4.1942	2.59538	6.14062	7.2044	5.18111	7.91007	1.39933	5.918	6.74883
DLG4	Disks large homolog 4;Isoform of P78352, Isoform 2 of Disks large homolog 4;Isoform of P78352, Isoform 3 of Disks large homolog 4	4.78962	0	0	2.3036	0	0	0	0	0	0	0	0	0	3.33488	0	0	0
DLGAP4	Disks large-associated protein 4;Isoform of Q9Y2H0, Isoform 3 of Disks large-associated protein 4	6.09959	5.30981	5.90736	7.90508	5.95809	5.06216	6.66365	7.36649	7.48081	5.1523	9.74792	8.90017	5.93367	9.66452	5.09473	5.22126	11.853
DLST	Dihydrolipoyllysine-residue succinyltransferase component of 2-oxoglutarate dehydrogenase complex, mitochondrial	424.229	304.845	458.24	511.454	391.838	674.894	975.915	534.024	255.005	351.886	486.309	873.37	669.612	913.23	185.362	377.377	607.895
DMAC1	Distal membrane-arm assembly complex protein 1;Isoform of Q96GE9, Isoform 2 of Distal membrane-arm assembly complex protein 1	21.717	12.5395	18.3736	27.3342	24.2497	20.1204	77.5197	25.0704	4.71464	6.47741	17.7057	32.6586	40.3295	70.531	4.90819	6.11752	32.0058
DMAC2L	ATP synthase subunit s, mitochondrial	7.14333	8.3441	8.89802	12.1341	7.73405	9.48497	19.8432	6.73846	9.29712	19.0371	11.2723	11.7923	5.03991	9.4467	10.8223	5.33059	14.3096
DMD	Dystrophin;Isoform of P11532, Isoform 3 of Dystrophin;Isoform of P11532, Isoform 2 of Dystrophin	23.9939	15.3137	17.6804	17.6038	10.5416	12.9998	12.3883	20.9585	21.8247	14.9865	23.9448	15.2475	10.2193	14.9617	8.35259	16.7138	23.9954
DMPK	Myotonin-protein kinase;Isoform of Q09013, Isoform 2 of Myotonin-protein kinase;Isoform of Q09013, Isoform 4 of Myotonin-protein kinase;Isoform of Q09013, Isoform 3 of Myotonin-protein kinase	2.16671	2.31036	1.35361	1.64099	1.36807	4.43339	5.78379	2.84028	2.72426	3.29687	6.02299	5.96071	8.95	4.82703	1.53293	4.39213	7.76298
DMRT2	Doublesex- and mab-3-related transcription factor 2	4.97509	7.75317	7.74628	9.2386	0	4.9629	8.76218	8.53612	4.00358	7.43193	16.0144	8.21671	9.29658	15.1593	9.22616	13.4889	13.3977
DMTN	Dematin	4.23839	6.36765	4.66652	5.34818	5.05949	3.0001	11.133	5.90283	4.1913	4.70437	10.605	10.5293	6.11397	15.5948	5.20021	20.9351	9.56376
DMXL1	DmX-like protein 1	0	0	0	0	0	0	0	0	0	0	5.62227	7.72321	0	0	0	0	8.17201
DNAAF1	Isoform of Q8NEP3, Isoform 2 of Dynein axonemal assembly factor 1	2.64911	0.808499	0	1.50213	0	1.32232	1.487	1.2917	1.11905	0.962723	1.19843	2.54623	1.87121	1.3683	0.592681	0.666308	2.59854
DNAAF10	Dynein axonemal assembly factor 10	1.08943	1.10785	1.14761	1.26505	0.892086	1.23605	1.37661	1.51412	0.86109	0	1.44781	1.98792	1.78165	1.47802	0.777179	1.51906	2.57353
DNAAF5	Dynein axonemal assembly factor 5	2.56744	4.16658	3.84055	4.44228	3.25917	4.70041	7.00829	3.92338	4.1913	5.94021	4.98209	7.9891	5.56703	6.62949	4.45883	5.25019	8.80904
DNAH1	Dynein axonemal heavy chain 1	0	0	0	0	0	0	0	0.466187	0.527046	0	0	0	0	0	0.377069	0.591255	0
DNAH10	Dynein axonemal heavy chain 10	2.68782	0.435692	0.735857	2.06636	0.568993	1.75201	0	1.39592	0	0	0.587235	0	2.32019	1.19834	0	0	0.87484
DNAH2	Dynein axonemal heavy chain 2	63.9294	42.372	34.3078	69.7278	41.0683	31.896	14.5115	26.9936	24.6688	42.0631	23.3782	29.478	12.8299	16.8299	23.4326	16.7794	21.8187
DNAH9	Dynein axonemal heavy chain 9	0	5.44477	0	0	5.21203	0	7.86162	0	7.52573	0	0	10.7671	8.01536	6.56116	0	0	0
DNAJA1	DnaJ homolog subfamily A member 1	2.54625	2.70072	3.05769	3.46502	2.21721	2.69424	3.63339	3.66489	3.39585	2.53981	3.6267	4.4864	5.69014	3.476	1.10362	3.11154	5.30064
DNAJA2	DnaJ homolog subfamily A member 2	49.057	43.0506	47.489	55.0055	35.8432	43.3147	65.0447	58.8655	46.5424	50.945	75.2163	64.1945	59.0504	71.7597	26.1409	57.1841	85.3943
DNAJA3	DnaJ homolog subfamily A member 3, mitochondrial	10.3992	6.25719	6.97418	9.06998	6.10952	10.7928	23.0894	14.4731	8.57134	9.48858	10.1885	19.1557	17.0853	19.6689	3.99504	10.3056	19.3165
DNAJA4	Isoform of Q8WW22, Isoform 2 of DnaJ homolog subfamily A member 4	19.485	16.6909	25.5442	26.86	15.8711	22.937	37.9675	29.0242	14.6167	15.1845	33.6986	38.8327	44.5885	51.0599	9.92021	18.3897	49.594
DNAJB1	DnaJ homolog subfamily B member 1	2.85431	3.43779	4.41157	3.21149	2.9121	2.12782	5.44894	4.23117	2.50408	2.71395	3.10679	5.38391	6.21188	7.12657	3.14283	4.56852	5.7323
DNAJB11	DnaJ homolog subfamily B member 11	1.58125	1.37778	2.29664	2.28195	1.45783	1.23947	2.89342	1.34017	2.68441	2.22844	1.42073	3.38297	3.6764	3.15922	1.07974	1.98324	4.31945
DNAJB12	DnaJ homolog subfamily B member 12	0.931753	0.649052	0.627037	1.01908	0.833503	1.35405	1.66078	2.4715	1.1093	0.590611	2.55395	2.09025	1.98712	5.14257	0	1.43938	1.93923
DNAJB2	DnaJ homolog subfamily B member 2	6.75462	6.56114	8.38288	8.18854	6.91205	6.68245	10.2852	8.57552	8.11799	9.38429	9.77039	9.59838	8.33918	11.7106	7.7897	7.96664	10.1281
DNAJB4	DnaJ homolog subfamily B member 4	15.8307	9.91241	13.3719	16.8231	9.79506	13.3763	11.4475	16.3065	13.2114	8.2566	15.9776	21.498	15.3965	21.6461	7.22971	7.57313	18.4174
DNAJB5	DnaJ homolog subfamily B member 5;Isoform of O75953, Isoform 2 of DnaJ homolog subfamily B member 5;Isoform of O75953, Isoform 3 of DnaJ homolog subfamily B member 5	0	0	0.327034	0	0.270774	0	0.617465	0	0	0	1.37408	1.55417	0	0.729592	0	0	0
DNAJB6	Isoform of O75190, Isoform C of DnaJ homolog subfamily B member 6	9.55434	4.11509	8.6376	0	5.05018	0	4.66887	0	21.6495	24.0105	0	23.1418	20.6597	5.55495	19.2939	23.5546	37.7163
DNAJB6	DnaJ homolog subfamily B member 6	5.01304	4.45738	5.63499	5.53231	4.24235	4.82098	8.14915	10.6797	5.66303	4.91136	10.1371	8.15264	6.03147	10.8788	2.5723	6.45469	9.62562
DNAJC10	DnaJ homolog subfamily C member 10;Isoform of Q8IXB1, Isoform 2 of DnaJ homolog subfamily C member 10	0	0	0	0	0	0	0	0	0.464995	0	0	0.603946	0.340819	0	0	0.587185	0.892953
DNAJC11	DnaJ homolog subfamily C member 11;Isoform of Q9NVH1, Isoform 3 of DnaJ homolog subfamily C member 11	15.1566	12.4934	13.152	16.7304	14.1484	18.3881	28.6624	17.3884	13.1356	13.8644	16.2634	30.8388	18.4172	29.7701	6.7908	14.2192	24.7018
DNAJC13	DnaJ homolog subfamily C member 13	15.3285	11.9503	13.9217	8.98889	11.254	7.50993	12.4627	11.2088	11.8208	16.372	8.67185	27.4093	19.2985	19.6553	6.10128	15.6342	34.4452
DNAJC17	DnaJ homolog subfamily C member 17	0	0.528177	1.00668	0	0.404676	0.621779	0.620029	1.35788	0.765154	0	0	0	0.739985	1.47938	0	0.923369	0
DNAJC19	Mitochondrial import inner membrane translocase subunit TIM14	3.57273	3.77554	4.02711	6.48943	3.50596	4.59553	11.809	6.37618	2.8678	4.45966	6.05636	11.3396	6.21904	12.1389	2.0612	3.08656	12.8685
DNAJC2	DnaJ homolog subfamily C member 2	0	0.678078	0	0	0	1.11979	1.78613	1.23356	0.985936	0	2.48606	2.80219	1.2509	1.86715	0.864412	1.3464	2.547
DNAJC21	DnaJ homolog subfamily C member 21;Isoform of Q5F1R6, Isoform 3 of DnaJ homolog subfamily C member 21	1.68074	2.8189	0	3.05708	0	2.07843	0	2.44546	2.42186	3.01857	1.96839	4.37419	3.99414	0	0	0	3.40117
DNAJC24	DnaJ homolog subfamily C member 24;Isoform of Q6P3W2, Isoform 2 of DnaJ homolog subfamily C member 24	2.45867	1.04998	2.01973	1.97563	1.92003	1.24376	1.50943	1.4644	1.04291	1.1023	1.99164	2.26724	1.36686	2.84302	1.11051	1.02536	2.84661
DNAJC25	Isoform of Q9H1X3, Isoform 3 of DnaJ homolog subfamily C member 25	2.57751	2.41702	3.38371	1.83234	1.79435	2.65116	2.64066	3.28898	2.6427	2.41992	1.39995	5.75305	4.81419	4.68361	2.93576	3.34715	4.59228
DNAJC28	DnaJ homolog subfamily C member 28	0	0	0	0	0	0.803037	1.46525	1.10322	0	0	0.842194	1.18059	0.745973	1.61169	0	0	1.16367
DNAJC3	DnaJ homolog subfamily C member 3	3.4898	1.77288	2.33826	1.73024	1.38933	2.13715	1.29245	2.69501	2.4336	2.14537	3.31216	4.98997	2.65964	2.78407	1.15351	2.83058	3.5705
DNAJC30	DnaJ homolog subfamily C member 30, mitochondrial	1.38676	1.60798	2.12126	0	1.65123	5.64983	7.45611	3.86688	1.63323	1.04472	3.88877	8.79019	5.93503	5.20092	0	1.40726	8.0432
DNAJC5	DnaJ homolog subfamily C member 5;Isoform of Q9H3Z4, Isoform 2 of DnaJ homolog subfamily C member 5	3.0486	3.39218	6.6358	5.85203	3.8932	2.38526	5.34579	1.86192	1.94021	4.6047	0	7.90857	6.55425	4.19354	1.99628	0.566729	8.01546
DNAJC7	DnaJ homolog subfamily C member 7	5.44002	5.2105	5.98264	6.62836	4.0955	4.32948	6.05358	4.3148	5.44814	6.42986	5.39898	7.55785	6.28815	6.22846	3.14428	4.26653	11.1874
DNAJC8	DnaJ homolog subfamily C member 8	4.97623	3.83248	5.07684	5.85607	4.14102	5.98461	5.94172	7.9316	7.88948	5.00843	6.27931	10.7497	7.13219	9.42932	7.05864	6.63552	8.30862
DNAJC9	DnaJ homolog subfamily C member 9	3.31742	2.93548	4.08501	3.60003	3.07119	1.48366	3.05923	2.4331	1.82452	4.6441	3.59263	4.4167	2.6015	6.08388	6.63775	0	3.76729
DNASE1L1	Deoxyribonuclease-1-like 1	5.31497	6.33986	7.13827	6.57819	4.23455	5.54544	3.91212	5.8393	8.72466	7.40971	7.19966	9.01152	6.12806	8.2505	6.47323	7.0368	12.2413
DNM1	Dynamin-1;Isoform of Q05193, Isoform 3 of Dynamin-1	2.46037	3.96077	3.68547	2.63334	3.32359	2.05843	3.11324	3.11789	3.73808	3.77921	3.37763	6.93103	6.36097	5.06734	4.50009	4.68355	5.99831
DNM1L	Isoform of O00429, Isoform 6 of Dynamin-1-like protein	0.423741	0.265081	0	1.22013	0.329312	2.42123	2.84454	1.39914	1.07263	1.1018	2.82106	4.07942	2.26216	2.26246	0.698266	1.1465	3.23541
DNM1L	Isoform of O00429, Isoform 4 of Dynamin-1-like protein	50.3849	47.6847	49.9681	72.062	55.4507	97.6418	111.484	83.2838	95.598	87.6196	94.8226	120.753	93.524	102.466	44.6705	80.1448	133.116
DNM2	Isoform of P50570, Isoform 4 of Dynamin-2	4.18505	0	0	0	3.59093	3.17933	0	5.18992	0	0	4.45258	5.5667	4.01905	4.16659	1.02476	3.89381	7.53579
DNM2	Isoform of P50570, Isoform 2 of Dynamin-2	33.3657	28.7263	27.5482	26.2909	24.5362	28.9958	34.2541	34.9672	34.6456	26.3755	36.1586	52.4322	39.8954	48.7506	23.9453	37.6162	58.2276
DNM3	Isoform of Q9UQ16, Isoform 2 of Dynamin-3;Isoform of Q9UQ16, Isoform 3 of Dynamin-3	11.2125	5.51416	13.6834	10.0186	7.45945	10.5423	11.7493	7.48963	13.516	10.1438	7.55983	19.9388	16.1184	16.443	7.36582	8.27895	16.6084
DNMBP	Dynamin-binding protein	1.3116	1.05167	1.43844	0.786876	0.974108	0.91714	1.37757	1.74526	0.658489	0.885934	0.921747	1.44144	1.17361	2.00254	0	0.954498	2.10295
DNMT1	DNA (cytosine-5)-methyltransferase 1;Isoform of P26358, Isoform 2 of DNA (cytosine-5)-methyltransferase 1;Isoform of P26358, Isoform 3 of DNA (cytosine-5)-methyltransferase 1	0.881456	0.7528	0.698704	0	0	0.567199	0	0	0	0	0.581182	0	0	0	0	0	0.790367
DNPEP	Aspartyl aminopeptidase;Isoform of Q9ULA0, Isoform 2 of Aspartyl aminopeptidase	22.5476	19.3232	18.6249	33.2741	22.5999	37.3195	25.3112	54.0083	22.0571	18.2348	43.2128	34.7535	33.0539	37.582	92.9011	34.4092	30.2572
DNPH1	2'-deoxynucleoside 5'-phosphate N-hydrolase 1	58.8438	50.72	78.0536	83.0436	60.0907	10.9707	27.8748	13.4791	77.9738	101.345	12.9811	48.239	27.6136	49.6456	142.896	43.1494	66.3023
DOCK1	Dedicator of cytokinesis protein 1	0	0.518417	0.805922	0.778765	0.568077	0	0	0.774748	0.671813	0.732658	0	1.15425	0.792909	0	0	0.81823	1.34564
DOCK2	Dedicator of cytokinesis protein 2	0	0	0	0	0	0	0	0	0	0	0.323081	0.735187	0.614926	0.326047	0	0	1.04937
DOHH	Deoxyhypusine hydroxylase	9.61835	9.38597	14.4808	13.2833	11.4632	9.00815	9.21324	9.65296	10.8156	14.5882	11.5083	15.1949	9.83837	15.2574	15.6719	10.2229	15.0497
DOK7	Protein Dok-7;Isoform of Q18PE1, Isoform 3 of Protein Dok-7	7.77501	6.93074	9.6337	10.5077	5.27603	7.91655	10.4379	10.7315	5.28139	5.6585	11.0411	10.0161	6.50464	10.8388	3.34365	7.29752	11.9297
DOP1B	Protein dopey-2;Isoform of Q9Y3R5, Isoform 2 of Protein dopey-2	0.508277	0.456961	0.605471	0.62475	0.520603	0.519201	1.23399	1.34512	0.605548	0.552206	1.30982	1.47163	0.965435	1.56452	0	0.639256	2.10392
DPAGT1	UDP-N-acetylglucosamine--dolichyl-phosphate N-acetylglucosaminephosphotransferase;Isoform of Q9H3H5, Isoform 2 of UDP-N-acetylglucosamine--dolichyl-phosphate N-acetylglucosaminephosphotransferase	24.0049	19.9517	19.4488	21.3258	25.6571	32.3919	21.6427	39.2158	28.0187	19.2266	31.4132	27.6948	51.7992	27.364	5.57983	18.2295	17.8127
DPCD	Protein DPCD	0	0	0	0	1.25605	0	2.69906	1.439	0	0	1.68582	0	2.61772	2.55553	0	1.28551	2.41395
DPF3	Isoform of Q92784, Isoform 3 of Zinc finger protein DPF3	0	0	0	0	0	0	0	0	0	0	0.951726	0	0	0	0	0	0
DPH1	2-(3-amino-3-carboxypropyl)histidine synthase subunit 1	2.14833	1.2673	2.1587	2.41216	1.78364	1.41168	1.80931	1.60828	2.17745	2.49059	3.04377	4.45347	3.81701	3.76513	2.35137	2.95308	5.69284
DPH2	2-(3-amino-3-carboxypropyl)histidine synthase subunit 2	2.13305	1.93901	2.9771	3.63	2.50039	2.04567	2.84454	2.23131	2.7935	3.37677	2.50329	5.05939	3.19759	4.28924	3.98218	3.8008	5.87528
DPH5	Diphthine methyl ester synthase;Isoform of Q9H2P9, Isoform 5 of Diphthine methyl ester synthase	3.92555	3.29898	4.61098	5.57964	3.16233	2.15892	4.49378	1.91849	3.86766	8.20921	2.8068	5.00147	3.35292	6.10493	7.51832	3.51217	7.19994
DPH6	Diphthine--ammonia ligase	5.55266	3.91904	4.68482	7.11551	4.45356	3.32994	5.01432	3.3355	3.87123	4.57722	4.15157	6.57958	5.07368	5.0429	5.60171	3.63141	6.25646
DPM1	Dolichol-phosphate mannosyltransferase subunit 1	4.23449	4.69547	5.43617	5.09808	5.03509	9.31613	6.16328	8.66883	5.23177	4.84174	7.27967	11.7219	8.28749	10.7865	2.66576	5.10241	11.8149
DPM3	Dolichol-phosphate mannosyltransferase subunit 3;Isoform of Q9P2X0, Isoform 2 of Dolichol-phosphate mannosyltransferase subunit 3	24.8829	20.0622	15.7759	23.0944	25.5863	56.1223	20.5879	49.9644	32.1698	17.0687	51.5361	32.3965	48.9129	30.1356	4.59643	31.6647	17.2555
DPP3	Dipeptidyl peptidase 3	13.9669	15.5267	28.9663	17.7136	14.9971	4.75703	7.61925	2.98855	7.01695	25.2698	4.29054	16.8693	8.13436	11.819	27.1845	9.93517	32.9783
DPP4	Dipeptidyl peptidase 4	38.7704	31.534	28.1964	34.6183	33.2895	55.4671	32.9391	56.7362	3.04964	0	99.1087	100.507	64.5986	51.1777	1.44584	4.59807	60.7895
DPP7	Dipeptidyl peptidase 2	0.631104	0.700292	1.57722	1.25865	0.654195	0	0.652698	0.619385	0.755699	0.786324	0.953481	0.782164	0.528109	0.823532	0.645537	0	1.46194
DPP8	Dipeptidyl peptidase 8;Isoform of Q6V1X1, Isoform 3 of Dipeptidyl peptidase 8;Isoform of Q6V1X1, Isoform 5 of Dipeptidyl peptidase 8	5.45131	5.11422	5.85454	6.54344	4.99237	4.8099	6.57374	6.12859	5.81097	6.83284	7.777	7.82345	5.47675	10.1761	4.4312	4.68463	10.6177
DPP9	Dipeptidyl peptidase 9;Isoform of Q86TI2, Isoform 2 of Dipeptidyl peptidase 9	9.97702	10.6605	11.6625	14.1093	10.5586	10.1797	13.7187	9.23763	9.05417	13.3291	10.2261	16.4929	9.39125	16.9934	12.6131	8.80796	19.6983
DPT	Dermatopontin	3.78182	3.39453	9.40358	4.64415	5.49297	8.64243	5.30777	4.64473	9.46779	8.42367	3.23007	9.64713	4.26308	5.13902	6.50011	5.93985	4.32841
DPY19L3	Probable C-mannosyltransferase DPY19L3;Isoform of Q6ZPD9, Isoform 2 of Probable C-mannosyltransferase DPY19L3	0.132312	0.117403	0	0	0.0620165	0	0.176771	0.0943975	0	0	0.189894	0.535548	0.255225	0	0	0	0.429961
DPY30	Protein dpy-30 homolog	1.46791	1.24991	1.94936	1.75957	1.21705	1.45726	2.04321	1.86149	1.27541	1.3731	1.84804	2.64788	2.54814	2.83322	1.90995	1.23332	3.92671
DPYD	Dihydropyrimidine dehydrogenase [NADP(+)]	0	0	1.30796	0	0	0	0	0	0	0	0	0	0	0	6.53915	0	1.51715
DPYSL2	Isoform of Q16555, Isoform 2 of Dihydropyrimidinase-related protein 2	40.2532	34.768	113.369	62.8212	42.0733	28.2186	43.5925	22.4419	42.4178	77.6786	46.133	52.6742	34.2707	32.017	130.623	29.7835	72.0325
DPYSL3	Isoform of Q14195, Isoform LCRMP-4 of Dihydropyrimidinase-related protein 3	79.8548	73.0431	117.949	118.934	61.0811	84.6322	79.4899	110.984	160.86	248.257	90.1596	149.176	78.3471	152.785	114.004	76.9086	175.966
DPYSL4	Dihydropyrimidinase-related protein 4	1.01625	0	0	0	0	0	0	0	0	0	0	0	0	0	0	0	0
DR1	Protein Dr1	11.8168	11.0276	19.0806	14.7777	11.1791	15.9932	12.1175	16.6058	16.848	14.4511	13.4993	22.141	20.208	27.2571	9.21342	9.99022	21.7936
DRAP1	Dr1-associated corepressor;Isoform of Q14919, Isoform 2 of Dr1-associated corepressor	4.12668	5.17463	4.92485	4.87311	4.23552	5.26667	6.42558	7.11968	7.72233	6.18588	5.97739	7.53699	7.45801	10.2066	3.10757	7.58534	8.59466
DRG1	Developmentally-regulated GTP-binding protein 1	7.82349	8.66123	9.10528	6.13347	5.79972	5.72711	12.2917	9.54466	8.18745	4.77641	9.83132	14.4743	10.9477	13.6672	16.1258	10.4154	11.4955
DRG2	Developmentally-regulated GTP-binding protein 2	42.0727	36.256	40.1045	48.9786	41.6013	26.2141	37.1546	36.9369	39.9161	42.609	43.2426	46.0891	40.3667	59.5361	23.3411	39.7077	57.7868
DSCAML1	Cell adhesion molecule DSCAML1	0	0	0	0	0	0	0	0	0	0	0	0	0	0	1.56719	0	0
DST	Dystonin	5.3003	3.56434	4.84165	4.80846	3.78449	3.98048	4.22778	4.14057	2.42744	4.46171	6.00913	6.68495	6.08308	7.90643	9.35451	1.23588	5.30064
DSTN	Destrin;Isoform of P60981, Isoform 2 of Destrin	35.1157	29.6879	47.8623	42.1897	31.089	17.9117	39.3924	24.8005	28.5923	40.6351	34.2068	53.8887	36.5867	29.1327	32.3758	26.9945	48.3981
DTD1	D-aminoacyl-tRNA deacylase 1	18.8495	15.8737	25.1069	19.1517	20.4836	30.1048	33.1598	32.8519	12.1352	10.3729	23.5837	36.2909	24.2395	31.4543	8.78054	8.89355	27.8631
DTNA	Isoform of Q9Y4J8, Isoform 16 of Dystrobrevin alpha;Isoform of Q9Y4J8, Isoform 5 of Dystrobrevin alpha	1.74261	0	0	2.96966	0	1.30207	0	1.01009	2.44652	0	1.50042	0	0.832191	1.23419	0	1.63033	0
DTNA	Isoform of Q9Y4J8, Isoform 15 of Dystrobrevin alpha	0.884099	0.825618	0.982863	1.2431	1.3095	0.692525	0	1.10474	0.920553	0	1.59703	0	0	0.807756	0	0	0
DTNA	Dystrobrevin alpha	11.9234	8.94292	8.26976	10.1393	6.02708	6.99577	5.86695	9.88008	8.13858	5.856	9.73222	10.6218	4.96619	11.5792	4.3714	5.77132	13.3545
DTNB	Isoform of O60941, Isoform 2 of Dystrobrevin beta;Isoform of O60941, Isoform 3 of Dystrobrevin beta;Isoform of O60941, Isoform 4 of Dystrobrevin beta;Isoform of O60941, Isoform 5 of Dystrobrevin beta	0	0	0.884083	1.22463	0	0.875661	1.81933	1.13569	0	1.40153	0.937804	1.02282	0.817567	1.53596	0.614074	1.50236	1.76372
DTWD2	tRNA-uridine aminocarboxypropyltransferase 2	2.22639	2.08631	1.20142	2.67921	2.1888	2.0405	1.66423	1.86406	2.10984	3.37677	2.32013	2.76948	1.34593	2.05485	1.95263	2.35275	4.04882
DTX2	Isoform of Q86UW9, Isoform 2 of Probable E3 ubiquitin-protein ligase DTX2	0.113606	0.265509	0	0	0	0	0	0	0.15362	0.259897	0	0	0	0	0.378287	0	0
DTX4	Isoform of Q9Y2E6, Isoform 2 of E3 ubiquitin-protein ligase DTX4	4.8084	3.90822	5.19629	3.86017	3.36827	6.62576	5.64953	5.77911	1.77643	11.5825	3.02351	10.8492	4.76456	6.92118	4.82526	6.63094	6.75816
DTYMK	Thymidylate kinase	6.68961	8.71323	10.3751	12.6388	6.25039	8.76669	8.04289	7.43636	11.8946	13.8676	5.88995	15.7797	10.4357	15.6056	14.2502	8.3517	20.8463
DUS1L	tRNA-dihydrouridine(16/17) synthase [NAD(P)(+)]-like	0.850748	0.938814	1.22968	1.45146	1.34495	0.783675	1.64328	1.2772	1.04099	1.80593	1.10972	1.39123	1.36089	1.97597	0.516204	1.03318	2.04799
DUS2	tRNA-dihydrouridine(20) synthase [NAD(P)+]-like	0	0	0	0.991988	0.616889	0	0	0	1.46032	0	0	1.33352	1.82357	0	0	0	0
DUSP12	Dual specificity protein phosphatase 12	1.82642	1.66065	2.93355	2.62124	2.12866	1.40876	2.40443	1.48888	1.34942	2.6589	1.78736	2.70457	1.99261	2.78535	2.03386	2.4181	3.72588
DUSP13	Isoform of Q9UII6, Dual specificity protein phosphatase 13 isoform A	29.971	34.9204	27.9958	39.3193	29.0875	22.7633	20.6544	25.7787	21.2153	37.1365	33.0226	22.2535	17.311	34.2358	29.7523	33.6492	30.6922
DUSP13B	Isoform of Q9UII6, Isoform 4 of Dual specificity protein phosphatase 13 isoform B	1.55489	0.842906	1.61396	0.736726	0.748526	1.19767	2.6737	1.56733	1.31386	1.15745	1.31284	1.77418	1.65891	1.62062	2.01893	1.22032	2.07171
DUSP15	Isoform of Q9H1R2, Isoform 2 of Dual specificity protein phosphatase 15;Isoform of Q9H1R2, Isoform 3 of Dual specificity protein phosphatase 15;Isoform of Q9H1R2, Isoform 4 of Dual specificity protein phosphatase 15	34.1823	38.8311	41.7247	40.2723	35.9341	38.9256	35.6297	33.3703	40.7332	40.3089	49.194	74.765	50.2022	53.3925	34.8996	41.4071	82.9906
DUSP19	Dual specificity protein phosphatase 19	1.90986	1.03034	1.99294	1.54066	1.44446	0.708983	1.36211	0.735801	0.969725	1.67148	0.387536	2.26255	1.99675	1.79672	1.06346	1.48859	3.10548
DUSP22	Dual specificity protein phosphatase 22	9.00121	7.5228	7.36704	9.1539	6.47153	10.5788	9.21748	10.5526	10.9761	11.8687	6.19173	9.4297	21.4943	11.3601	11.6391	10.0595	10.6372
DUSP23	Dual specificity protein phosphatase 23	3.25238	6.70624	11.9122	8.09108	6.85026	5.82151	15.2726	7.14761	10.9056	15.1357	8.66986	10.0948	13.5152	14.736	15.5568	12.1556	14.7784
DUSP26	Dual specificity protein phosphatase 26	0	0	0	0	0	0	0	1.87224	0	0	2.53753	0	0	0	0	0	0.51148
DUSP28	Dual specificity phosphatase 28	19.8336	17.0522	21.0375	26.8168	18.4165	18.1567	17.4587	19.9922	21.1567	22.8403	23.0363	26.5276	12.8122	27.1132	23.6767	17.9422	25.0627
DUSP29	Dual specificity phosphatase 29	28.7079	25.1177	24.1153	33.5356	23.9501	15.2313	16.1255	21.3383	21.5699	22.0344	34.5949	24.7456	9.26879	35.3737	22.4347	17.4452	43.3939
DUSP3	Dual specificity protein phosphatase 3	63.8265	39.9466	70.096	73.9446	41.4102	58.2553	41.8035	35.7899	89.4023	197.061	48.4297	63.5621	29.5477	41.0847	110.286	33.789	101.491
DUT	Deoxyuridine 5'-triphosphate nucleotidohydrolase, mitochondrial	11.5985	10.8363	11.9865	12.7294	10.7747	10.105	17.2231	14.3338	7.64625	7.32658	17.1203	19.9801	22.8572	22.1503	8.42987	8.68711	20.046
DVL1	Isoform of O14640, Isoform 2 of Segment polarity protein dishevelled homolog DVL-1	7.60503	6.65701	9.7206	9.40603	6.5044	9.0539	10.9727	8.74904	13.3429	11.9537	10.2568	14.9485	13.9773	13.0641	13.7632	8.14845	15.1925
DVL2	Segment polarity protein dishevelled homolog DVL-2	0	0.681678	0	0.453113	0.320706	0.886004	0.823023	0.887484	0	1.25806	1.29781	1.3406	1.2901	1.35108	3.02706	0.820871	0.827044
DVL3	Segment polarity protein dishevelled homolog DVL-3;Isoform of Q92997, Isoform 2 of Segment polarity protein dishevelled homolog DVL-3	3.67283	1.97006	3.68547	3.58844	3.26593	3.55415	4.76774	5.01026	2.65063	2.39884	4.36226	5.22875	5.07251	5.04871	1.88591	2.84757	4.94685
DYM	Dymeclin	3.87169	3.83424	4.21302	4.74577	3.40257	3.42875	5.1205	3.81119	2.81805	3.52697	5.29312	4.49778	3.49079	5.00357	2.74108	3.74693	5.78001
DYNC1H1	Cytoplasmic dynein 1 heavy chain 1	58.7085	54.5606	59.237	52.1683	39.6284	56.2129	60.6614	68.0081	77.099	65.4337	69.6646	106.807	100.49	66.693	34.6674	70.2061	131.41
DYNC1I2	Isoform of Q13409, Isoform 2B of Cytoplasmic dynein 1 intermediate chain 2;Isoform of Q13409, Isoform 2C of Cytoplasmic dynein 1 intermediate chain 2	18.051	14.2751	13.5267	13.3385	11.1124	15.6544	15.5172	21.4072	17.793	12.4452	24.0277	27.4346	23.7861	25.6378	6.08304	15.1627	37.4653
DYNC1LI1	Cytoplasmic dynein 1 light intermediate chain 1	9.03859	7.79255	8.6635	7.30308	4.79962	7.99716	9.88809	8.26153	6.71349	6.00761	8.18487	17.8977	15.1434	12.7579	4.28471	9.28699	20.1432
DYNC1LI2	Cytoplasmic dynein 1 light intermediate chain 2	4.38128	4.19256	4.27458	5.03856	3.34971	3.94581	5.12168	5.14115	4.46734	5.10742	5.94856	8.36755	6.3041	6.74032	3.77938	4.76843	9.0621
DYNLL1	Dynein light chain 1, cytoplasmic	5.86544	3.64485	4.71404	5.5145	2.2055	4.05449	2.09755	4.9689	4.77473	3.61328	8.18299	11.2356	8.14185	9.43366	7.4374	3.99094	19.9264
DYNLL2	Dynein light chain 2, cytoplasmic	21.36	19.7415	21.4483	15.0732	16.6536	22.4407	27.1964	26.8572	13.5565	14.0024	25.6987	33.9233	27.0099	28.3583	14.2469	17.0167	35.5983
DYNLRB1	Dynein light chain roadblock-type 1	1.12228	0.704335	2.09987	1.54066	1.55922	1.08802	0	1.83722	2.54477	2.84251	2.03007	3.08317	4.82862	4.34491	3.9023	0	6.07615
DYNLT1	Dynein light chain Tctex-type 1	5.02806	4.26854	2.59952	3.45228	2.78552	2.93451	4.25806	5.69588	4.43454	3.50915	6.54353	6.78107	5.75338	6.59448	2.42505	6.66001	9.9341
DYNLT3	Dynein light chain Tctex-type 3	1.60583	2.05816	3.25007	2.46664	1.51498	2.50574	3.11682	2.77754	1.04123	1.29659	3.41989	6.08973	4.53861	4.53294	1.4224	1.53312	5.83887
DYRK1A	Dual specificity tyrosine-phosphorylation-regulated kinase 1A;Isoform of Q13627, Isoform 1 of Dual specificity tyrosine-phosphorylation-regulated kinase 1A;Isoform of Q13627, Isoform 2 of Dual specificity tyrosine-phosphorylation-regulated kinase 1A;Isoform of Q13627, Isoform 3 of Dual specificity tyrosine-phosphorylation-regulated kinase 1A;Isoform of Q13627, Isoform 4 of Dual specificity tyrosi…	0	2.80272	3.58999	2.71836	4.81955	4.71233	4.54059	5.69719	5.54943	3.95823	6.64985	7.43872	8.30469	6.39117	0	5.08364	6.80658
DYRK1B	Dual specificity tyrosine-phosphorylation-regulated kinase 1B	0.0766656	0	0	0	0	0	0.13391	0.113988	0.501359	0.373165	0	0.138324	0	0	0	0.342827	0.272288
DYSF	Isoform of O75923, Isoform 15 of Dysferlin	1.43384	1.33039	0	1.64743	0.992218	0	0	0.703009	1.17855	0	0	2.16869	0	0	0	0	1.74152
DYSF	Isoform of O75923, Isoform 8 of Dysferlin	218.928	188.009	199.294	223.463	187.244	250.689	199.946	341.555	276.661	193.153	331.216	405.133	203.668	346.641	45.7005	219.925	363.437
EARS2	Probable glutamate--tRNA ligase, mitochondrial	23.0728	26.0123	15.0104	31.8865	21.3652	29.6576	34.8026	35.4781	17.8135	33.9392	37.0435	48.719	35.6224	45.0796	14.9355	35.463	56.4324
EBAG9	Receptor-binding cancer antigen expressed on SiSo cells;Isoform of O00559, Isoform 2 of Receptor-binding cancer antigen expressed on SiSo cells	0	0	0	0	0	3.56891	0	4.22241	2.62996	0	6.76569	0	0	5.80872	0	2.34355	0
EBP	3-beta-hydroxysteroid-Delta(8),Delta(7)-isomerase	71.1051	36.8366	49.0335	50.5599	56.067	163.056	73.217	165.143	12.2758	12.6882	127.53	94.4057	113.168	65.7174	0	33.4022	60.4267
ECD	Protein ecdysoneless homolog;Isoform of O95905, Isoform 3 of Protein ecdysoneless homolog	0	0	0	0	0	0	0.66744	0.865886	0.625099	0	0.903882	1.87024	0.713384	0.648754	0	0	1.19489
ECE1	Endothelin-converting enzyme 1;Isoform of P42892, Isoform A of Endothelin-converting enzyme 1;Isoform of P42892, Isoform C of Endothelin-converting enzyme 1;Isoform of P42892, Isoform D of Endothelin-converting enzyme 1	0	0.201456	0.401599	0.296624	0.148459	0	0	0	0	0	0	0.373851	0	0.428628	0	0	0.763886
ECH1	Delta(3,5)-Delta(2,4)-dienoyl-CoA isomerase, mitochondrial	42.3449	15.1733	22.5524	70.4703	22.3927	67.5827	148.598	71.9218	40.1373	119.757	68.3773	84.2555	78.5278	109.416	33.3673	35.2351	105.519
ECHDC1	Ethylmalonyl-CoA decarboxylase;Isoform of Q9NTX5, Isoform 2 of Ethylmalonyl-CoA decarboxylase	19.4044	16.5531	24.0488	27.1273	20.5356	11.234	35.0116	16.8368	14.7248	27.8677	23.989	10.9093	14.7715	13.0401	11.7414	21.1824	12.9906
ECHDC2	Enoyl-CoA hydratase domain-containing protein 2, mitochondrial	6.24454	5.06383	5.05118	10.1393	5.91026	7.21333	11.4766	10.4703	5.89452	7.36888	5.52093	9.59396	4.83085	16.5493	4.96273	5.98929	10.5543
ECHDC3	Enoyl-CoA hydratase domain-containing protein 3, mitochondrial	36.1744	40.4557	47.0103	37.3772	48.1845	55.6334	74.8363	69.0336	34.0368	65.1031	70.9271	66.3587	51.4308	84.5435	22.0557	59.0439	55.2623
ECHS1	Enoyl-CoA hydratase, mitochondrial	370.681	323.727	403.825	527.602	377.665	359.945	303.468	301.759	337.092	309.102	391.572	181.593	132.747	168.415	92.4956	171.307	256.938
ECI1	Enoyl-CoA delta isomerase 1, mitochondrial	57.9296	85.247	58.992	105.586	75.1635	26.9052	71.4352	56.4236	25.7661	40.9451	55.6176	39.183	62.8237	83.9036	24.844	27.0131	94.8263
ECI2	Enoyl-CoA delta isomerase 2;Isoform of O75521, Isoform 2 of Enoyl-CoA delta isomerase 2	42.005	31.9653	31.0594	50.4436	30.9533	47.0258	156.752	49.5519	30.5667	34.2453	60.6474	59.1014	50.2138	91.7023	35.2063	33.8435	60.1906
ECM1	Extracellular matrix protein 1;Isoform of Q16610, Isoform 4 of Extracellular matrix protein 1	0	0.447383	0.733826	0	0	0	0	0	0.429387	1.12513	0	0	0	0.931066	4.26404	0	2.19093
ECPAS	Proteasome adapter and scaffold protein ECM29	24.3725	21.8363	28.4376	32.8176	19.8658	34.1535	45.4791	31.3156	32.3704	30.1579	35.1246	55.3603	43.7949	52.2373	26.2193	34.4648	61.225
ECSCR	Endothelial cell-specific chemotaxis regulator	2.71207	2.73703	4.53621	3.44514	3.24195	0	2.64736	2.31932	3.3262	4.34812	0	3.2404	3.10258	5.38121	2.5178	2.62649	3.34679
ECSIT	Evolutionarily conserved signaling intermediate in Toll pathway, mitochondrial	0.459305	1.52258	1.57904	2.60139	0.764376	3.15744	5.43015	2.04956	2.2251	1.85824	4.64742	6.31536	3.61929	2.7082	0.699715	1.95288	7.83662
EDC3	Enhancer of mRNA-decapping protein 3	5.82506	4.36897	6.15734	4.82177	3.4301	8.24396	7.71813	7.39198	5.71148	5.29543	6.66365	7.5805	7.60892	7.49688	4.17947	5.83949	8.29333
EDC4	Enhancer of mRNA-decapping protein 4	1.51985	1.54447	1.52719	1.43122	1.32619	1.57122	1.88804	2.30123	1.78875	1.75106	2.1853	3.47055	2.02686	2.86009	1.38109	2.5309	3.77771
EDEM3	ER degradation-enhancing alpha-mannosidase-like protein 3;Isoform of Q9BZQ6, Isoform 2 of ER degradation-enhancing alpha-mannosidase-like protein 3	0	0	0.14057	0.27146	0.122746	0	0	0.2811	0.165786	0	0.249237	0.361575	0.411172	0.313387	0	0.223859	0.58834
EDF1	Endothelial differentiation-related factor 1	9.158	8.6972	9.79249	9.00132	7.27289	9.79796	12.0009	12.8074	5.86339	2.9971	13.2103	15.0799	10.9982	15.6344	11.1512	4.3982	14.7716
EEA1	Early endosome antigen 1	36.6017	31.1731	42.2857	42.5017	31.2541	34.557	42.6297	48.9058	56.513	45.3003	52.0969	57.0162	46.5289	65.8083	17.649	53.6383	74.8391
EEF1A1	Elongation factor 1-alpha 1;Putative elongation factor 1-alpha-like 3	27.8548	34.3463	41.5521	26.9902	29.9162	28.6771	42.8462	26.7646	29.864	32.0628	44.1684	124.165	120.538	43.2793	45.7531	38.2803	94.9574
EEF1A2	Elongation factor 1-alpha 2	2899.35	1855.15	2271.4	2361.6	1772.58	1885.54	1949.45	2035.45	3199.25	2292.99	2461.57	3015.77	2240.39	2461.96	3210.86	2322.07	3114.07
EEF1AKMT1	EEF1A lysine methyltransferase 1	5.80097	5.40853	7.6488	8.05205	6.53442	5.61741	7.00345	5.2476	5.53285	6.58569	5.99255	7.44043	6.68995	8.40582	9.37823	5.14606	7.21986
EEF1AKMT2	Isoform of Q5JPI9, EEF1A lysine methyltransferase 2	1.40249	0.785922	0	4.00227	1.34062	0	1.85957	1.51901	1.18181	1.29958	0	0	0	1.8276	0.929653	0	2.30903
EEF1AKMT2	EEF1A lysine methyltransferase 2	1.39991	0	2.66313	1.84674	1.27852	0.823447	1.24398	0	0	2.15328	1.09147	2.16321	1.18038	1.18081	0	0	2.51379
EEF1B2	Elongation factor 1-beta	56.5719	51.9373	48.5169	66.82	44.382	87.5661	86.6388	83.0158	87.6897	82.6421	113.295	137.847	94.0423	105.313	56.9929	106.408	173.952
EEF1D	Isoform of P29692, Isoform 2 of Elongation factor 1-delta	95.3676	83.4218	83.7516	115.241	69.4076	143.528	180.473	146.07	135.565	119.537	206.639	233.184	180.519	189.749	70.0843	143.178	310.977
EEF1D	Isoform of P29692, Isoform 3 of Elongation factor 1-delta	0.487529	0.583686	0.555128	1.59921	0.44803	1.22754	1.73106	1.48272	1.00011	1.24452	1.8937	1.55955	1.30895	1.78517	0.523626	1.68646	2.53646
EEF1E1	Eukaryotic translation elongation factor 1 epsilon-1	2.04786	1.94796	2.76371	2.64245	2.13849	4.04796	4.73274	4.47364	3.28586	2.57455	3.62837	8.12266	5.89418	5.17107	0.940635	4.63527	6.96993
EEF1G	Elongation factor 1-gamma	64.062	56.7648	58.1424	72.3613	45.4367	98.8407	128.355	98.279	77.9379	80.8168	125.52	156.783	110.847	116.864	43.0349	92.5924	191.218
EEF2	Elongation factor 2	474.68	320.39	581.29	522.163	407.105	461.249	289.542	335.784	749.978	703.398	345.233	532.106	359.189	317.527	563.405	230.821	760.552
EEF2K	Eukaryotic elongation factor 2 kinase	17.7705	20.2153	24.0322	25.4921	21.2035	21.0541	15.733	35.5763	33.6007	24.78	43.7937	32.3369	16.8276	30.583	14.9562	27.1378	43.735
EEFSEC	Selenocysteine-specific elongation factor	13.6082	14.9444	18.4881	18.1721	13.2071	17.3874	20.465	22.1851	16.3512	16.5883	23.698	26.8719	22.7679	27.0321	11.123	19.4301	28.8356
EEPD1	Endonuclease/exonuclease/phosphatase family domain-containing protein 1	2.33454	2.37509	2.9682	2.99024	1.69866	2.37157	2.26627	2.90443	2.22049	2.51537	3.19751	3.79838	2.6015	4.22552	0	2.32153	3.63018
EFCAB5	EF-hand calcium-binding domain-containing protein 5;Isoform of A4FU69, Isoform 3 of EF-hand calcium-binding domain-containing protein 5	0	0	0	0	0	0	7.41331	7.6447	4.34659	0	0	22.141	0	0	0	4.46144	20.7028
EFEMP1	EGF-containing fibulin-like extracellular matrix protein 1;Isoform of Q12805, Isoform 2 of EGF-containing fibulin-like extracellular matrix protein 1;Isoform of Q12805, Isoform 3 of EGF-containing fibulin-like extracellular matrix protein 1;Isoform of Q12805, Isoform 4 of EGF-containing fibulin-like extracellular matrix protein 1	9.82428	10.1573	16.9783	15.4314	8.87988	5.39928	11.8662	4.38087	9.33789	10.9371	3.79762	29.9294	18.8809	20.4965	14.9321	8.0311	19.3432
EFEMP2	EGF-containing fibulin-like extracellular matrix protein 2	2.54332	1.81084	3.31507	2.64427	1.60253	2.14208	1.78243	1.68485	1.8563	1.58271	1.83786	7.05664	2.82829	2.7995	1.24257	1.8025	4.54285
EFHD1	EF-hand domain-containing protein D1	3.78879	1.9199	4.90222	0	2.64184	1.15249	3.35747	9.21638	4.62433	7.68248	4.31332	3.83529	4.68946	11.8299	5.01904	5.58567	8.91105
EFHD2	EF-hand domain-containing protein D2	4.12573	3.19139	7.44549	4.3612	3.07898	2.76526	5.75059	3.14891	4.30476	5.99793	4.30836	10.6585	8.54325	6.87037	6.34923	4.24889	13.8016
EFL1	Elongation factor-like GTPase 1	3.53346	3.46401	3.86539	4.66237	4.07856	3.90513	5.23856	5.13879	5.03093	4.4916	5.33472	6.24594	5.78127	6.83251	3.89243	4.5048	7.11261
EFNB1	Ephrin-B1	4.53942	4.46971	6.88007	5.48664	7.46976	3.96311	9.17302	6.11872	4.73313	3.4618	6.55408	10.24	6.28526	11.5606	6.24196	6.65388	7.50808
EFR3A	Protein EFR3 homolog A	2.69899	2.55258	3.1088	2.65709	2.10236	2.42179	2.89476	2.88377	1.95546	1.91647	3.42856	4.46476	4.2474	3.47201	1.15324	2.43095	4.62944
EFR3B	Protein EFR3 homolog B	0	0.190362	0.65312	1.35459	0.47066	0.964797	0.738435	0.902528	0	0	1.07056	0.999765	0	1.43212	0	0.451414	1.13013
EFTUD2	116 kDa U5 small nuclear ribonucleoprotein component;Isoform of Q15029, Isoform 2 of 116 kDa U5 small nuclear ribonucleoprotein component	4.00498	3.35799	3.84851	3.82742	3.20854	4.43033	4.96949	5.40207	4.6222	4.08697	5.61063	5.86136	4.52609	5.54856	1.67194	3.56349	5.68236
EGFLAM	Isoform of Q63HQ2, Isoform 2 of Pikachurin	1.76036	2.10223	1.30465	1.90461	1.21957	1.33118	2.44744	1.26724	0.926507	0	1.84847	3.55875	2.57705	2.52918	0	0.837481	4.8891
EGFR	Epidermal growth factor receptor	4.66983	3.80785	5.70812	6.51338	4.66774	3.52968	4.08519	3.46386	5.02862	5.33337	4.08049	7.77854	5.49697	5.32697	7.45454	4.83142	7.63007
EGLN1	Egl nine homolog 1	4.28944	3.6896	5.33572	4.86975	4.79741	7.02159	9.47354	8.10887	6.55162	4.84955	9.98187	7.21769	5.9693	8.45046	4.62297	6.04471	6.70392
EHBP1	Isoform of Q8NDI1, Isoform 2 of EH domain-binding protein 1;Isoform of Q8NDI1, Isoform 3 of EH domain-binding protein 1	0.654336	0	0	0.574918	0.487761	0.463805	0.797282	0.993712	0.925654	0.689924	1.14423	1.84969	1.55605	1.155	0.539412	1.35824	1.4336
EHBP1L1	EH domain-binding protein 1-like protein 1	37.7052	32.5371	39.5269	44.5252	32.8252	39.5126	38.6912	41.5108	37.0808	38.4505	50.3514	62.6611	43.0153	55.1544	26.676	39.6712	79.0367
EHD1	EH domain-containing protein 1	35.9667	37.2288	41.1333	33.9943	38.5929	32.5264	38.1603	39.3333	33.6007	34.9383	32.9315	50.1993	34.3814	50.7201	25.0623	40.7076	38.153
EHD2	EH domain-containing protein 2	109.044	139.534	117.759	141.712	134.248	139.007	158.749	205.192	110.726	88.4304	194.049	133.382	114.742	147.768	29.169	154.944	89.0284
EHD3	EH domain-containing protein 3	2.94714	2.13147	3.34344	3.97655	2.52759	2.53826	2.5428	2.98099	4.53888	3.20333	2.50272	5.03382	4.70136	5.99902	6.09847	4.72145	4.43332
EHD4	EH domain-containing protein 4	6.74995	7.51068	13.3842	7.13685	6.8345	8.05259	6.26055	6.37178	6.26107	11.228	8.70586	13.5581	9.61885	8.06455	7.45798	7.22229	12.9369
EHHADH	Peroxisomal bifunctional enzyme	1.39509	0	0	0	0	0	3.08896	0	0	0	1.72112	3.48657	2.21627	2.70757	0	0	0
EHMT2	Histone-lysine N-methyltransferase EHMT2;Isoform of Q96KQ7, Isoform 2 of Histone-lysine N-methyltransferase EHMT2	0	0	0	0.59021	0	0.704102	0	0.903359	1.28543	1.67071	1.47949	0.970059	0.4588	0	0	0	0
EI24	Etoposide-induced protein 2.4 homolog;Isoform of O14681, Isoform 2 of Etoposide-induced protein 2.4 homolog	0.903859	0.665855	1.1803	1.22492	0.768789	1.49877	1.88718	0.95821	0.494366	0	0	3.56614	1.26306	2.50311	0.536563	0.420799	2.77542
EIF1	Eukaryotic translation initiation factor 1	11.8441	9.51874	10.5704	12.5778	9.38009	8.68432	9.7659	9.48551	9.01257	9.18759	10.998	13.0978	8.21719	12.8938	10.0884	7.26901	16.9953
EIF1AD	Probable RNA-binding protein EIF1AD	5.96212	4.51939	11.0814	8.06689	5.2651	8.07673	5.59773	8.3399	11.6802	10.4713	7.54765	12.4939	7.45801	11.1296	6.58144	5.7501	10.6839
EIF1AX	Eukaryotic translation initiation factor 1A, X-chromosomal	22.9404	18.3941	19.5926	19.6158	19.5122	19.0913	21.282	29.2052	16.6015	12.6358	29.2828	24.3724	17.6491	30.0248	4.77332	14.746	27.3419
EIF1AY	Eukaryotic translation initiation factor 1A, Y-chromosomal	0	0	0	0	0	9.66353	12.4684	0	0	0	10.5806	16.2517	8.91914	0	0	0	19.2854
EIF1B	Eukaryotic translation initiation factor 1b	0.556033	0.696754	0.850537	1.01299	0.548917	0.714226	0.430638	0.779041	0.678654	0.178773	0.542515	0.937342	0.683318	0.61742	0	0.343776	1.16635
EIF2A	Eukaryotic translation initiation factor 2A	3.43321	2.49448	2.4751	0.599938	1.10588	2.43857	3.92024	2.47549	2.02092	1.94806	4.07955	5.32964	4.19685	7.78718	2.36821	0	7.28163
EIF2AK2	Interferon-induced, double-stranded RNA-activated protein kinase	1.09497	1.98372	1.98104	1.94987	1.53783	1.28687	3.01101	2.07425	1.15731	1.22293	2.55101	2.9512	2.89217	2.92739	1.46258	1.42553	3.63604
EIF2B1	Translation initiation factor eIF-2B subunit alpha	1.79639	4.80042	4.08313	4.43003	2.63698	2.71166	5.17502	2.35158	4.98366	8.10404	2.48206	7.95423	7.99877	6.81994	11.3141	4.7487	12.2667
EIF2B2	Translation initiation factor eIF-2B subunit beta	20.8114	20.8008	22.0137	20.7399	17.8693	13.2415	20.2727	13.0786	14.7248	17.2187	13.4497	25.7928	27.7602	29.88	22.3831	19.8415	34.8521
EIF2B3	Translation initiation factor eIF-2B subunit gamma	15.2406	12.638	13.5267	18.6899	13.7059	14.2016	18.924	20.5287	19.4782	21.306	23.0734	23.7136	20.6644	23.3658	14.045	21.9066	32.4809
EIF2B4	Translation initiation factor eIF-2B subunit delta	0.815644	0.910918	0	1.47641	0.968962	1.77474	1.83532	1.74929	2.04526	1.06097	2.07497	2.33291	2.17732	1.90274	0	1.31909	3.59276
EIF2B4	Isoform of Q9UI10, Isoform 2 of Translation initiation factor eIF-2B subunit delta;Isoform of Q9UI10, Isoform 3 of Translation initiation factor eIF-2B subunit delta	3.34196	2.85417	5.14509	5.20243	2.50039	4.88805	6.03827	5.44077	3.78921	4.02255	5.2001	10.6659	6.53466	8.1373	3.18215	5.6712	12.8656
EIF2B5	Translation initiation factor eIF-2B subunit epsilon	9.99772	8.81819	9.1452	9.83572	8.11161	12.4233	17.2192	15.5439	11.1956	10.0833	16.9399	21.3746	18.5192	17.9135	5.31277	13.1001	24.662
EIF2D	Eukaryotic translation initiation factor 2D	1.36931	1.67718	0.943394	0.765608	0.710079	0.956832	1.90508	1.82541	1.61231	1.23567	2.08503	2.35395	1.69092	2.07578	0	2.25775	2.86899
EIF2S1	Eukaryotic translation initiation factor 2 subunit 1	49.9805	43.6395	55.5895	50.8401	44.4331	39.8599	49.6149	49.8724	52.6076	53.7405	56.6255	60.1448	46.4219	68.8621	43.1043	47.6953	73.3379
EIF2S2	Eukaryotic translation initiation factor 2 subunit 2	21.9938	18.6801	20.2672	21.3455	16.2109	29.6712	36.5437	39.8805	20.4432	14.3153	31.6601	38.2383	25.0278	46.89	8.62822	19.8461	45.87
EIF2S3	Eukaryotic translation initiation factor 2 subunit 3	41.976	33.7427	38.0534	44.556	30.9818	53.5964	64.4781	75.5024	48.4561	27.5551	66.3608	80.3708	49.9946	104.059	14.9941	39.1269	90.7672
EIF3A	Eukaryotic translation initiation factor 3 subunit A	20.3939	17.684	14.8831	13.2711	13.3201	24.8964	17.9189	25.03	26.9432	16.2518	23.2762	30.6265	19.3029	25.9645	9.13106	16.2209	31.2197
EIF3B	Eukaryotic translation initiation factor 3 subunit B;Isoform of P55884, Isoform 2 of Eukaryotic translation initiation factor 3 subunit B	18.395	15.3243	10.8516	13.2864	12.0007	24.5322	17.7506	27.0995	23.499	15.0142	25.6869	28.9133	17.4954	26.9513	8.50396	18.025	36.3772
EIF3C	Eukaryotic translation initiation factor 3 subunit C	27.7333	23.866	18.9014	18.9979	18.2519	35.0216	25.681	35.1286	29.5494	18.5311	34.428	39.4456	28.2959	35.3086	10.9653	23.6252	40.2373
EIF3D	Eukaryotic translation initiation factor 3 subunit D;Isoform of O15371, Isoform 2 of Eukaryotic translation initiation factor 3 subunit D;Isoform of O15371, Isoform 3 of Eukaryotic translation initiation factor 3 subunit D	13.3721	12.9831	11.6116	12.1006	9.56108	18.5027	15.7077	21.422	17.9081	12.1787	20.3804	25.433	18.5662	20.4024	8.05974	15.0375	30.7488
EIF3E	Eukaryotic translation initiation factor 3 subunit E	9.17066	7.40934	7.1235	5.78904	6.19308	13.6344	10.76	14.6981	15.0089	10.0393	14.7575	19.0195	13.6497	14.7157	5.22542	13.0369	21.7284
EIF3F	Eukaryotic translation initiation factor 3 subunit F	13.5988	12.8611	12.7583	12.7587	11.6898	17.5564	16.8117	19.4742	22.113	18.0885	19.4631	28.3856	19.4591	22.7762	11.6552	19.4659	30.4179
EIF3G	Eukaryotic translation initiation factor 3 subunit G	12.6678	9.51435	10.3632	9.58973	8.00584	16.5781	14.4515	19.5596	14.0071	11.3058	20.9707	24.4792	18.4937	17.5299	5.75468	13.686	25.6761
EIF3H	Eukaryotic translation initiation factor 3 subunit H	12.4997	11.3052	11.9095	11.4395	9.8516	18.1107	15.9776	21.2697	16.8248	9.87646	19.7429	24.3612	17.4471	18.6974	6.79862	12.5019	29.0488
EIF3I	Eukaryotic translation initiation factor 3 subunit I	17.3101	15.8336	14.6249	17.824	13.0319	27.7419	23.8239	30.0996	27.2489	19.8519	31.3554	38.8327	27.9655	29.2604	8.36991	23.3332	42.7493
EIF3J	Eukaryotic translation initiation factor 3 subunit J	34.7297	27.484	27.9636	33.4662	25.5804	25.7653	27.3472	33.7179	26.8812	29.3158	32.6898	38.3706	19.9261	48.9193	18.0643	25.3498	48.2535
EIF3K	Eukaryotic translation initiation factor 3 subunit K;Isoform of Q9UBQ5, Isoform 2 of Eukaryotic translation initiation factor 3 subunit K	3.10814	3.1534	9.3281	7.22614	4.80847	4.39882	13.2164	5.21387	3.07644	4.43814	3.7052	12.9359	6.74253	14.3146	7.22805	3.66079	11.1771
EIF3L	Eukaryotic translation initiation factor 3 subunit L	12.4223	10.0804	10.1764	11.046	8.78632	17.8993	16.1403	18.3299	15.8763	11.4922	19.0201	26.0914	18.1436	18.9226	6.17619	13.1666	27.1474
EIF3M	Eukaryotic translation initiation factor 3 subunit M	10.3705	8.30002	7.45235	8.76812	7.7626	12.7126	12.3229	13.0997	12.7717	10.6513	13.7345	19.0195	12.8004	16.7525	3.82315	12.0774	20.6504
EIF4A1	Eukaryotic initiation factor 4A-I	100.809	96.4893	132.493	108.369	88.717	108.302	101.021	100.963	132.754	134.277	123.541	152.44	99.7524	130.251	142.502	116.138	157.228
EIF4A2	Eukaryotic initiation factor 4A-II;Isoform of Q14240, Isoform 2 of Eukaryotic initiation factor 4A-II	19.6201	20.6053	26.0972	22.3721	19.8065	31.2346	19.4766	20.1354	28.5725	32.3744	20.3944	31.0455	16.0888	23.9045	34.6355	20.1129	34.652
EIF4A3	Eukaryotic initiation factor 4A-III	3.16156	3.6373	4.8797	4.55519	3.78797	5.88485	4.60375	7.63063	5.23418	3.65596	6.41966	8.1264	5.66791	8.35373	2.23574	3.94435	7.90549
EIF4B	Eukaryotic translation initiation factor 4B	45.2481	36.9981	36.4161	26.5648	30.5005	34.1535	46.7318	48.4798	20.8424	20.1837	44.1481	48.5063	32.8642	61.1196	22.1933	26.1382	56.5625
EIF4E	Eukaryotic translation initiation factor 4E;Isoform of P06730, Isoform 2 of Eukaryotic translation initiation factor 4E	15.6748	10.4347	13.3565	17.2467	13.8295	15.0986	16.1887	12.5881	21.2887	21.3551	12.8207	24.5922	12.7474	18.7361	33.1376	19.637	30.6499
EIF4E2	Eukaryotic translation initiation factor 4E type 2;Isoform of O60573, Isoform 2 of Eukaryotic translation initiation factor 4E type 2	1.7187	1.31184	2.02999	2.37906	1.42694	1.74637	2.3031	2.67523	2.09097	2.63573	3.50439	3.0535	2.24504	3.29519	2.17882	1.64731	3.94847
EIF4E3	Eukaryotic translation initiation factor 4E type 3	10.6268	9.48592	12.4192	15.567	12.3967	9.10827	9.90404	9.32955	7.39177	11.8796	10.4571	12.3168	7.77183	12.9205	9.73691	9.17223	14.8467
EIF4EBP1	Eukaryotic translation initiation factor 4E-binding protein 1	12.5141	12.2456	24.575	17.4464	18.7848	5.11135	13.3417	7.85345	3.21254	10.2636	7.21127	11.4445	11.6983	23.6091	9.03901	4.83699	21.5342
EIF4EBP2	Eukaryotic translation initiation factor 4E-binding protein 2	2.29298	1.44138	4.02618	3.48262	0	0	1.25116	0	0	1.69786	0	2.89333	2.14005	3.54144	3.94931	0	3.69853
EIF4ENIF1	Eukaryotic translation initiation factor 4E transporter;Isoform of Q9NRA8, Isoform 3 of Eukaryotic translation initiation factor 4E transporter	0	0	0.644901	0	0	0	0.662998	0.698169	0.489383	0.540756	0.874202	0.604781	0.77611	1.05531	0	0.63325	1.26686
EIF4G1	Isoform of Q04637, Isoform 8 of Eukaryotic translation initiation factor 4 gamma 1	82.7562	82.9238	52.5283	71.7474	64.418	71.0127	79.4351	108.633	70.1695	46.8599	119.347	93.7558	49.8222	135.232	35.927	65.2492	121.823
EIF4G2	Eukaryotic translation initiation factor 4 gamma 2	13.403	11.3078	11.2433	9.42988	8.16407	9.53753	16.1924	12.7897	11.8508	9.21513	14.7032	16.6954	12.4774	14.5506	10.9149	12.2963	18.528
EIF4G3	Eukaryotic translation initiation factor 4 gamma 3;Isoform of O43432, Isoform 3 of Eukaryotic translation initiation factor 4 gamma 3	1.24681	1.17079	1.34956	1.56281	0.989936	1.10824	1.38552	1.87958	1.41595	1.02992	2.73849	1.77786	1.44352	2.47902	0	1.52502	3.24585
EIF4H	Eukaryotic translation initiation factor 4H;Isoform of Q15056, Isoform Short of Eukaryotic translation initiation factor 4H	35.9667	33.9453	48.5281	41.8703	31.6597	25.1267	37.4638	28.8643	36.1617	53.2355	28.6822	46.3445	33.1454	53.3434	57.4541	30.887	60.7615
EIF5	Eukaryotic translation initiation factor 5	71.0724	69.2276	77.5342	90.3454	74.7665	66.2271	70.9271	112.243	79.5699	88.2676	114.002	94.9725	60.9429	121.473	51.3477	92.1457	110.187
EIF5A	Eukaryotic translation initiation factor 5A-1;Isoform of P63241, Isoform 2 of Eukaryotic translation initiation factor 5A-1	393.732	383.954	484.053	443.207	375.497	427.106	447.829	393.605	282.78	261.157	455.001	607.013	414.403	645.476	164.635	219.419	742.555
EIF5B	Eukaryotic translation initiation factor 5B	13.116	11.6246	8.61178	11.6844	11.9483	17.9819	16.5277	20.9392	15.8799	10.266	20.9224	21.2079	14.8875	17.3732	12.2045	12.7109	19.4773
EIF6	Eukaryotic translation initiation factor 6	28.6221	29.6879	45.8979	35.9837	31.175	22.4303	23.3352	20.0984	27.7874	45.5514	36.8309	41.2665	24.3458	41.2269	58.4818	28.1628	51.9552
EIPR1	EARP and GARP complex-interacting protein 1	2.87145	1.65302	3.31966	2.38071	2.30148	3.10696	4.63567	3.16418	4.04435	4.26188	4.20157	5.98133	5.37308	4.27445	2.38848	4.21867	7.55838
ELAC2	Zinc phosphodiesterase ELAC protein 2;Isoform of Q9BQ52, Isoform 4 of Zinc phosphodiesterase ELAC protein 2	0.90178	0.972925	1.46924	1.37723	0.966511	1.72797	2.63883	2.27804	1.34384	1.5371	3.06487	1.9925	2.52885	3.03655	0.347393	1.65111	2.95276
ELANE	Neutrophil elastase	5.94978	5.73561	5.92916	7.08445	8.22635	3.02368	8.8514	3.19272	3.73378	4.25992	8.91891	8.04448	6.6838	16.2697	9.24956	12.7695	13.4316
ELAPOR2	Endosome/lysosome-associated apoptosis and autophagy regulator family member 2	0.146252	0	0.266313	0	0.15926	0	0.13725	0	0.259686	0.306974	0.102544	0.594016	0.706843	0.357257	0.251316	0.243879	0.69124
ELAVL1	ELAV-like protein 1;Isoform of Q15717, Isoform 2 of ELAV-like protein 1	3.77312	2.23758	3.54563	2.66322	2.06209	3.90783	5.5733	4.78697	3.54608	2.88404	4.38038	5.17128	2.86169	6.09229	5.48303	2.56847	5.21469
ELMO1	Engulfment and cell motility protein 1	1.20754	1.20138	1.70213	1.55814	1.18743	1.24921	1.83321	1.1947	1.85203	2.02396	1.44648	3.54812	2.83807	1.79672	2.08892	2.42201	3.58368
ELMO2	Engulfment and cell motility protein 2	0.498656	0.637792	0.750573	0.398205	0.610249	0.63553	0.891276	0.935967	0.88746	1.21004	0.992686	1.7104	1.4552	0.549137	1.03973	1.09088	2.02875
ELMOD2	ELMO domain-containing protein 2	14.5949	9.49466	10.1811	16.1364	11.6254	14.7549	14.8222	17.3125	11.2111	11.6199	18.7937	15.2897	23.3789	22.8129	4.74374	11.4071	19.6168
ELN	Isoform of P15502, Isoform 1 of Elastin;Isoform of P15502, Isoform 2 of Elastin;Isoform of P15502, Isoform 4 of Elastin	0	0	0	0	0	0.389256	0	0	0	0	0	1.20171	1.02973	0	0	0	0
ELOA	Elongin-A	0	0	0	0	0	2.18492	0	2.98855	10.6647	0	3.8834	0	0	0	0	0	0
ELOA3DP	Elongin A3 family member D, pseudogene	0	0	0	0	0	0	0	1.49644	0	0	0	0	0	1.92345	0	0	0
ELOB	Elongin-B;Isoform of Q15370, Isoform 2 of Elongin-B	32.1293	28.4171	56.4408	42.1994	26.3092	21.3666	34.8347	25.7787	32.0958	55.3862	25.5807	38.8417	31.0044	44.9863	81.4181	23.9925	64.9574
ELOC	Elongin-C	157.616	119.311	178.276	197.018	140.672	121.405	161.403	147.489	182.915	184.63	137.883	200.308	151.504	227.762	205.883	151.941	245.883
ELOF1	Transcription elongation factor 1 homolog	0	0	0	0	0.577839	0.791837	0	1.0665	0	0	0.895183	0.815076	1.29188	1.44637	0	0	1.03736
ELOVL1	Elongation of very long chain fatty acids protein 1	8.26801	4.3359	8.68147	11.1559	7.99479	7.17853	7.49397	5.97944	0	10.6145	8.94153	9.73639	11.0058	8.06641	4.66145	8.61143	8.96455
ELP1	Elongator complex protein 1	1.08069	2.20333	3.12747	2.09994	1.67729	2.90627	3.92385	3.57405	2.81157	2.81839	3.60423	5.53475	4.11551	3.48482	0.990196	2.59224	6.28534
ELP2	Elongator complex protein 2;Isoform of Q6IA86, Isoform 2 of Elongator complex protein 2;Isoform of Q6IA86, Isoform 3 of Elongator complex protein 2;Isoform of Q6IA86, Isoform 5 of Elongator complex protein 2;Isoform of Q6IA86, Isoform 6 of Elongator complex protein 2	0.672978	0.829429	0.876381	1.04137	0.724614	1.54823	1.65811	2.11087	1.30361	0.635772	2.22696	2.68286	1.9504	2.40702	0	1.18406	3.61184
ELP3	Elongator complex protein 3	1.80136	2.14773	2.34689	2.11595	1.81722	2.76208	3.85756	3.42737	3.51034	3.46578	3.65942	4.8128	4.03388	4.63746	4.14879	3.01908	6.27666
ELP5	Elongator complex protein 5;Isoform of Q8TE02, Isoform 2 of Elongator complex protein 5;Isoform of Q8TE02, Isoform 3 of Elongator complex protein 5;Isoform of Q8TE02, Isoform 4 of Elongator complex protein 5	0	0	0.765232	0.47589	0.786334	0.458602	1.09904	0.526818	0	0	0	0.965602	0.896444	1.18108	0	0	1.03951
ELP6	Elongator complex protein 6;Isoform of Q0PNE2, Isoform 2 of Elongator complex protein 6	1.14974	0.413599	0	0	0.884926	0.565895	1.10538	0.798658	0	0	0.650297	0.929818	1.19763	1.07989	0	0	1.76534
EMC1	ER membrane protein complex subunit 1;Isoform of Q8N766, Isoform 2 of ER membrane protein complex subunit 1	7.00649	6.55812	7.99822	8.60214	7.36897	11.4666	9.55459	12.7544	10.2435	8.61195	10.6859	15.5811	9.19863	13.9888	1.84086	7.59758	14.8193
EMC10	ER membrane protein complex subunit 10;Isoform of Q5UCC4, Isoform 2 of ER membrane protein complex subunit 10	0.598964	0.723901	1.06192	0.884517	0.651339	0.704589	0.957882	0.789334	1.41726	1.05318	0.770038	1.32281	0.97864	1.34147	0.985873	1.14941	1.40646
EMC2	ER membrane protein complex subunit 2	11.6118	9.99952	11.9177	11.8333	7.69143	16.521	10.3732	15.2672	11.3671	0	16.8971	23.922	15.6431	22.8918	9.6188	14.4236	24.8158
EMC3	ER membrane protein complex subunit 3	5.31742	3.71774	6.44159	5.18808	4.63775	11.5169	8.36204	11.4172	1.85758	0	9.63634	12.3367	9.68107	12.8552	0	2.78532	10.674
EMC4	ER membrane protein complex subunit 4	20.2535	10.2442	10.5291	11.7302	11.817	20.9236	12.6041	20.557	10.4894	8.46645	19.2713	18.4798	17.5761	19.6961	2.05646	10.7319	18.8161
EMC6	ER membrane protein complex subunit 6	0	5.36018	0	0	6.52991	14.1461	0	15.6733	13.1507	10.1649	10.4091	0	9.52847	13.5856	5.93774	23.13	10.7307
EMC7	ER membrane protein complex subunit 7	5.86004	4.05489	4.90222	8.04649	7.1764	8.25726	6.37253	11.2632	11.0497	10.0601	9.90175	11.7111	6.67918	12.0359	2.70036	9.79659	12.4431
EMC8	ER membrane protein complex subunit 8	2.91743	2.64472	2.18924	3.18938	2.3616	4.43645	4.0552	4.86475	4.34859	3.4882	3.98485	5.60271	4.02553	5.88004	0	3.49522	6.16636
EMC9	ER membrane protein complex subunit 9	9.23636	6.33256	10.4518	6.43141	6.59792	4.90383	8.34473	6.60786	2.77044	9.38645	6.09975	9.18329	5.01791	8.56999	5.11471	0	10.5446
EMCN	Endomucin;Isoform of Q9ULC0, Isoform 2 of Endomucin;Isoform of Q9ULC0, Isoform 3 of Endomucin	0.259299	0.411888	0	0.2354	0.267736	0.1564	0.401063	0.180368	0.319484	0.25404	0	0	0.910381	0	0	0	0.568891
EMD	Emerin	6.3665	6.43249	7.0875	9.21523	6.01737	10.4963	11.9705	12.6812	8.02691	7.69664	10.2686	14.184	12.7123	14.2456	3.70443	6.22695	13.4936
EMILIN1	EMILIN-1	0	0	0	0	0	0.98727	0	1.09638	1.0961	1.13032	0.960311	1.37816	1.00884	1.69387	0	1.04298	0.805061
EML1	Echinoderm microtubule-associated protein-like 1;Isoform of O00423, Isoform 3 of Echinoderm microtubule-associated protein-like 1	39.0932	24.8416	35.1474	32.5766	21.6824	30.5447	27.0341	39.7064	27.4251	18.8496	42.512	41.9274	15.0912	43.4991	19.1523	18.5684	47.0575
EML2	Echinoderm microtubule-associated protein-like 2;Isoform of O95834, Isoform 2 of Echinoderm microtubule-associated protein-like 2;Isoform of O95834, Isoform 3 of Echinoderm microtubule-associated protein-like 2	3.45303	3.50735	4.85728	7.46803	4.12579	3.77603	4.03564	5.04732	4.18262	6.49384	2.5352	5.13923	3.57374	6.41624	6.59813	1.97686	9.07463
EML3	Echinoderm microtubule-associated protein-like 3	8.2623	7.98324	2.58638	12.3369	6.44476	9.85907	12.4026	11.3099	12.4666	2.30782	9.67636	12.2546	10.276	15.5089	12.1345	0	19.1791
EML4	Echinoderm microtubule-associated protein-like 4	0	0	0.845655	0	0	1.18778	2.03288	0.886055	0.589588	1.59258	0.775375	2.42604	1.70147	2.10465	0	0.957139	2.07888
ENAH	Protein enabled homolog;Isoform of Q8N8S7, Isoform 2 of Protein enabled homolog;Isoform of Q8N8S7, Isoform 3 of Protein enabled homolog	0.698555	0	0	0.238016	0	0.464554	0	0	1.14881	0	0	1.25112	1.21653	0	0	1.39083	0
ENDOD1	Endonuclease domain-containing 1 protein	422.961	351.139	277.2	472.831	475.124	1116.18	508.291	1079.35	483.781	384.327	1015.57	573.585	600.376	706.448	129.128	491.106	424.745
ENDOG	Endonuclease G, mitochondrial	64.0325	76.2394	77.5877	103.301	64.0335	112.703	199.44	188.304	49.5848	62.5895	173.585	138.26	96.833	219.271	17.8493	104.731	166.966
ENG	Endoglin;Isoform of P17813, Isoform Short of Endoglin	12.936	7.79255	9.88537	3.8442	6.8235	5.62517	4.92847	1.2513	5.66172	9.2215	3.35824	8.12266	3.28642	3.84929	7.62994	4.34585	8.82732
ENGASE	Cytosolic endo-beta-N-acetylglucosaminidase	0.288736	0.346401	0.195881	0.608564	0.292555	0.761615	0.518576	0.911089	0.634817	0	0.703092	1.34493	0	0.664784	0	0	1.04527
ENO1	Isoform of P06733, Phosphopyruvate hydratase	17.3301	23.4736	29.8053	31.3694	17.6322	14.0713	42.307	11.7858	18.4395	26.903	21.8681	0	13.1833	20.7386	59.0094	10.5578	0
ENO1	Alpha-enolase	19.2088	22.9604	29.1335	35.1646	16.9397	15.6112	20.3101	12.4183	21.5997	34.7697	18.5914	17.1356	15.879	15.2258	37.0187	15.2291	18.9858
ENO2	Gamma-enolase	1.88582	0	0	0	1.0445	0	0	0	0	0	0	1.52019	0	0	6.8489	0	0
ENO3	Beta-enolase	367.791	400.94	366.769	464.094	288.806	174.275	194.631	237.389	273.747	250.612	307.264	329.229	146.765	261.927	610.831	164.087	434.239
ENOPH1	Enolase-phosphatase E1	39.1472	27.6554	50.3725	49.3863	37.8623	31.4149	37.9151	31.5327	35.7807	51.4401	36.2336	49.522	33.3982	51.7345	57.4012	35.8736	46.1348
ENOSF1	Mitochondrial enolase superfamily member 1	1.76726	1.85216	3.79746	2.04459	1.88455	0	3.35592	0.764118	3.50065	3.09102	1.14871	2.84314	1.45621	2.83061	14.1196	1.3934	2.28628
ENPEP	Glutamyl aminopeptidase	0.920239	1.09794	1.04206	2.40994	0.449373	0	1.6835	0	0	0.753705	0	2.08832	1.59707	1.29772	0.910167	0	2.62318
ENPP1	Ectonucleotide pyrophosphatase/phosphodiesterase family member 1	0.872571	0.694351	2.28662	1.34186	0.883297	0.766189	4.31531	1.05308	0.559691	1.76279	0.851357	2.52289	1.24429	1.83265	2.18787	0.709864	3.92129
ENPP4	Bis(5'-adenosyl)-triphosphatase ENPP4	3.21441	3.48963	5.77023	5.7386	2.76635	0.8516	4.16689	0.706741	1.85203	2.99503	0.553748	4.21112	4.47119	4.80264	3.73784	1.31212	8.05803
ENSA	Alpha-endosulfine;Isoform of O43768, Isoform 3 of Alpha-endosulfine	109.673	88.4666	97.9249	94.2988	93.7145	70.6538	94.0183	86.2503	66.2748	70.5182	96.1196	116.654	76.212	156.56	68.8052	83.806	123.29
ENTPD1	Ectonucleoside triphosphate diphosphohydrolase 1;Isoform of P49961, Isoform 2 of Ectonucleoside triphosphate diphosphohydrolase 1;Isoform of P49961, Isoform 6 of Ectonucleoside triphosphate diphosphohydrolase 1	0	0	0	0	0	0	0	0	0	0.17006	0	0	0	0	0.331071	0	0.195537
ENTPD2	Ectonucleoside triphosphate diphosphohydrolase 2	38.4947	35.5042	28.4507	52.3006	42.5899	64.3926	21.1745	62.6413	42.594	33.791	39.2294	50.3382	35.1498	50.1049	20.8123	37.5383	53.5339
ENTPD5	Nucleoside diphosphate phosphatase ENTPD5	0.621299	0	0	1.39575	1.57401	1.73594	1.37218	1.23328	1.7937	2.06967	2.02867	2.88601	1.44419	2.22065	0	2.89985	2.29049
ENTREP1	Endosomal transmembrane epsin interactor 1;Isoform of Q15884, Isoform 4 of Endosomal transmembrane epsin interactor 1	0.885117	0.722403	0.580087	0.64745	0.800215	0.968581	0.91984	1.06038	1.05572	0.879835	1.22691	1.22433	0.87624	1.24217	0.897472	1.3197	1.38876
ENY2	Transcription and mRNA export factor ENY2;Isoform of Q9NPA8, Isoform 2 of Transcription and mRNA export factor ENY2	16.7417	15.925	16.0692	16.6459	15.4315	13.324	20.5595	16.7672	14.0168	12.7939	20.3007	16.8732	15.1329	22.7395	8.2058	16.9971	20.6409
EPB41	Isoform of P11171, Protein 4.1	4.27761	3.4	4.54353	5.36422	4.52905	3.59696	5.40396	4.64687	2.79414	3.42611	5.0911	0	2.98005	8.59964	0	3.37734	4.75695
EPB41	Protein 4.1;Isoform of P11171, Isoform 2 of Protein 4.1;Isoform of P11171, Isoform 3 of Protein 4.1;Isoform of P11171, Isoform 4 of Protein 4.1	30.047	36.0478	33.8917	38.575	34.8022	23.1066	53.3473	40.3702	23.9138	24.0548	57.6251	56.0787	32.9551	87.6356	18.7422	53.0976	57.7336
EPB41L1	Isoform of Q9H4G0, Isoform 2 of Band 4.1-like protein 1	2.63998	2.13786	3.26057	2.58111	2.2055	2.33903	3.32133	2.77115	2.30117	2.76122	3.12257	5.73717	4.41696	4.07925	1.4939	2.95921	5.81472
EPB41L2	Isoform of O43491, Band 4.1-like protein 2	0	0.536141	1.24421	0	0.449994	0.914189	0	0	0	0	0	1.20725	0	1.46312	1.03329	0	0
EPB41L2	Band 4.1-like protein 2	21.0863	20.1039	33.3268	29.2218	21.8578	17.2241	22.6054	23.821	23.391	27.9384	23.4321	36.5846	31.5227	30.7667	19.6617	25.1927	36.5787
EPB41L2	Isoform of O43491, Isoform 4 of Band 4.1-like protein 2	2.33346	1.7992	2.91738	3.36594	2.13898	1.98169	1.86085	2.79615	2.69742	2.39884	2.61705	4.05413	3.601	3.1317	2.29838	2.86204	2.86767
EPB41L3	Isoform of Q9Y2J2, Isoform 2 of Band 4.1-like protein 3	0	0	0	0	0	0	0	0	0	0	2.1194	2.68966	2.87358	0.998804	2.73666	2.96671	4.56698
EPB41L3	Isoform of Q9Y2J2, Isoform 4 of Band 4.1-like protein 3	2.35451	2.47445	2.18119	1.9907	1.4448	2.49308	3.53763	2.65009	2.9995	5.41504	6.48802	7.81085	8.23423	4.17139	3.19316	5.12006	13.754
EPB41L4B	Band 4.1-like protein 4B	0	0.583417	0	0.761213	0.596633	0.393039	0	0.728888	0.732738	0	0.489229	1.00161	1.08224	0	0	0.545601	0.553387
EPB42	Isoform of P16452, Isoform Long of Protein 4.2	21.2716	30.6464	20.1601	20.3801	22.2744	11.7391	51.1343	17.773	17.344	15.7544	41.5443	50.4194	35.6552	79.0279	15.4569	58.1534	48.0871
EPDR1	Mammalian ependymin-related protein 1	4.92154	4.22065	4.30223	8.44707	3.22409	36.5457	10.5806	10.1289	4.97678	4.51338	15.9005	13.8547	13.8078	10.9164	0	0	13.3054
EPG5	Ectopic P granules protein 5 homolog	0	0.845239	0	0	0	0.529098	0.69185	0.385621	0	0	0.427083	0.969835	0.471219	1.07122	0	0	0.730851
EPHA7	Ephrin type-A receptor 7;Isoform of Q15375, Isoform 2 of Ephrin type-A receptor 7;Isoform of Q15375, Isoform 4 of Ephrin type-A receptor 7	0	0	0	0	0	0	0	0	0	4.54675	0	7.41819	4.10037	0	3.1479	2.76042	6.55887
EPHB4	Ephrin type-B receptor 4	0	0.817672	1.39217	1.05295	0	1.25007	1.14819	1.62652	0	1.50523	1.71322	2.5627	1.51783	1.53349	0	0	1.58719
EPHX1	Epoxide hydrolase 1	133.537	200.622	121.953	252.352	231.317	1300.58	619.173	1621.66	307.502	109.648	1417.14	311.6	781.31	349.688	54.2152	368.193	198.075
EPHX2	Bifunctional epoxide hydrolase 2	0	0.447383	0.546504	1.04787	0.358515	0	0	0	0.412334	0.610101	0	0	0	0	0.872813	0	0
EPM2A	Isoform of B3EWF7, Laforin	20.408	28.5154	27.7455	30.0059	20.3145	42.3483	36.6701	32.2078	29.1708	35.8428	29.3367	44.8537	17.435	41.6755	75.8265	22.5567	56.6016
EPM2AIP1	EPM2A-interacting protein 1	24.0381	19.6643	24.8024	27.5935	20.6684	19.509	23.3138	21.6202	20.7562	20.754	27.2654	40.7285	24.6447	27.8023	17.9399	20.553	42.3281
EPN1	Epsin-1	9.03443	9.54068	12.7936	11.366	8.85334	9.77993	12.0147	11.462	13.5784	12.0282	12.9602	16.6647	12.015	17.2338	13.3574	10.9289	16.766
EPN2	Epsin-2;Isoform of O95208, Isoform 2 of Epsin-2	11.7031	12.5684	12.6909	13.3477	10.0834	16.5058	14.4016	14.2745	12.0129	9.80622	14.2795	20.5115	19.7935	22.5206	5.57855	11.8843	23.4007
EPPK1	Epiplakin	0	0	0	0	0.892086	0.620491	0	0.63542	1.68946	0	0	0	0	0	0	0	1.90559
EPRS1	Bifunctional glutamate/proline--tRNA ligase	41.0394	34.6003	33.5114	41.1345	32.5317	33.6694	48.9793	32.6633	49.1981	45.1338	33.6598	77.3389	51.4545	68.3881	22.8098	41.5695	92.051
EPS15	Epidermal growth factor receptor substrate 15	11.6466	11.3052	11.4023	13.8072	10.1463	9.78444	11.828	15.5726	14.3995	13.4742	18.2185	17.5913	13.9709	19.687	7.33366	13.7143	23.2664
EPS15L1	Isoform of Q9UBC2, Isoform 2 of Epidermal growth factor receptor substrate 15-like 1	13.113	11.8653	14.0215	16.4819	9.63179	9.41533	12.6041	14.1632	10.7857	11.2176	13.9963	16.1845	11.6795	24.4726	9.81343	10.176	20.6409
EPS8	Epidermal growth factor receptor kinase substrate 8	1.52546	1.37366	2.52809	1.72745	2.0082	1.64224	1.85957	1.5811	1.0173	1.21984	1.5143	3.58012	3.06142	2.49276	1.2026	1.22709	2.63833
EPX	Eosinophil peroxidase	2.37849	1.92877	0.990816	1.72745	0.561057	1.6502	1.8185	0	1.79535	0	3.69158	3.09384	1.30895	2.43995	0	1.53206	3.18148
ERAL1	GTPase Era, mitochondrial	0	0.539733	0.434403	0.762441	0.484738	1.69682	2.39063	1.64384	0.845568	0	1.54139	2.68348	1.96211	1.29951	0	0.74761	2.13663
ERAP1	Isoform of Q9NZ08, Isoform 2 of Endoplasmic reticulum aminopeptidase 1	4.74352	6.631	7.70182	12.4625	5.16425	5.63814	6.85823	3.47425	4.27808	10.2212	8.35626	13.3413	9.64324	8.32684	9.88601	7.49679	23.1435
ERAP2	Endoplasmic reticulum aminopeptidase 2;Isoform of Q6P179, Isoform 3 of Endoplasmic reticulum aminopeptidase 2	0	2.36417	8.89392	0	1.9187	1.6937	0	1.38376	1.68907	0	0	4.31716	0	2.59585	4.11454	0	0
ERBIN	Erbin;Isoform of Q96RT1, Isoform 2 of Erbin;Isoform of Q96RT1, Isoform 3 of Erbin;Isoform of Q96RT1, Isoform 4 of Erbin;Isoform of Q96RT1, Isoform 5 of Erbin;Isoform of Q96RT1, Isoform 6 of Erbin;Isoform of Q96RT1, Isoform 7 of Erbin;Isoform of Q96RT1, Isoform 8 of Erbin;Isoform of Q96RT1, Isoform 9 of Erbin	6.46102	5.41227	7.00476	6.38714	4.90916	5.17649	6.52097	5.3206	10.4628	9.48858	5.8521	7.29286	6.53466	7.01262	5.50581	10.6384	9.97077
ERC1	ELKS/Rab6-interacting/CAST family member 1	2.08545	2.08103	1.32249	3.15941	0	2.693	2.66816	3.38813	3.56902	2.16372	1.97702	5.91014	2.93848	3.51868	0	4.35888	4.2153
ERCC1	DNA excision repair protein ERCC-1;Isoform of P07992, Isoform 2 of DNA excision repair protein ERCC-1	1.06023	0.966672	1.77784	1.82939	1.32894	1.41298	0	1.26346	0	0	1.57366	2.13402	1.93742	2.78407	0	0	2.2209
ERCC4	DNA repair endonuclease XPF	0	0	0	0	0	0.227843	0.449482	0.222464	0.818368	0.852121	0.583192	0.410391	0	0	0.360347	0.974485	0.493434
ERCC6L2	DNA excision repair protein ERCC-6-like 2	0	0	0	1.82392	0	0	0	0	1.06598	1.92177	0	0	0	0	0	0	0
ERG28	Ergosterol biosynthetic protein 28 homolog	6.04506	0	7.43521	3.73599	4.7611	8.49055	15.157	6.26269	0	0	5.58614	15.2229	8.23423	12.2965	0	0	10.2336
ERGIC1	Endoplasmic reticulum-Golgi intermediate compartment protein 1;Isoform of Q969X5, Isoform 2 of Endoplasmic reticulum-Golgi intermediate compartment protein 1	26.8226	23.7673	30.7817	26.4123	26.05	31.3788	40.6548	30.8859	39.7511	39.1112	27.0279	58.6001	44.4655	49.5656	21.7882	47.6294	44.1905
ERGIC2	Endoplasmic reticulum-Golgi intermediate compartment protein 2	0	0.595223	0.438625	0.45836	0.287612	0.44518	0.760698	0.698812	0.740199	0.383532	0.933495	1.58379	1.48294	0.902985	0	0.961115	1.99035
ERGIC3	Endoplasmic reticulum-Golgi intermediate compartment protein 3;Isoform of Q9Y282, Isoform 3 of Endoplasmic reticulum-Golgi intermediate compartment protein 3	1.40832	1.10887	2.05207	1.46996	1.48528	1.3214	2.00684	0.739879	0.962828	1.17815	1.17899	2.54389	2.45823	2.09981	1.02429	0.737862	4.16034
ERI3	ERI1 exoribonuclease 3	5.39263	6.3838	5.61427	6.32712	6.44625	5.05168	8.42194	5.41702	5.83779	7.37397	6.38281	7.54915	4.63685	6.53101	6.60878	5.33304	9.17125
ERLEC1	Endoplasmic reticulum lectin 1;Isoform of Q96DZ1, Isoform 3 of Endoplasmic reticulum lectin 1	0.555649	0.589494	0.898035	0.906163	0.650889	1.41135	0.974568	1.38058	1.72643	1.82348	1.21958	2.45413	1.87725	1.33377	0.639177	1.3727	2.03952
ERLIN1	Erlin-1	0	2.64289	5.30143	5.67945	3.39787	4.73626	4.15539	3.46865	4.53053	4.69139	3.21301	10.4279	4.02831	8.80603	3.72238	4.63954	9.42169
ERLIN2	Erlin-2	32.0849	30.1564	45.7713	36.9323	29.7171	41.9504	31.2617	33.1406	37.6659	33.1132	27.0528	75.7353	27.7283	59.3581	20.9614	26.569	50.3186
ERMP1	Endoplasmic reticulum metallopeptidase 1	9.0824	4.29813	6.2646	6.96797	6.68047	13.9071	7.39967	9.7895	21.9608	12.6503	7.99672	15.1669	14.0936	18.6115	7.1816	6.68767	12.1823
ERN1	Serine/threonine-protein kinase/endoribonuclease IRE1	1.32099	0.661119	0	0	0	0.963686	2.05784	0.784622	0.458721	0	0.566124	1.6592	0.939557	1.09139	0	0.763616	0.692355
ERO1A	ERO1-like protein alpha	8.33491	9.66672	11.6975	11.5853	8.77621	7.70789	12.9007	7.48274	6.46024	9.29825	6.18603	16.3832	12.8861	15.4803	7.47861	4.83476	20.0368
ERP29	Endoplasmic reticulum resident protein 29	3.55878	2.73577	7.34502	4.25017	2.89339	1.86439	2.91684	2.17852	4.9085	7.50933	1.59629	5.07105	4.00058	4.85714	21.2677	3.06955	8.91105
ERP44	Endoplasmic reticulum resident protein 44	6.71121	5.90989	10.9268	10.902	5.7439	1.89206	5.9719	2.07186	5.47455	12.5199	2.65529	7.9744	5.30791	7.32623	16.0111	2.21858	12.7271
ESAM	Endothelial cell-selective adhesion molecule	3.49141	4.97141	8.42545	8.89624	6.06048	4.60506	4.72729	5.25606	4.50867	7.59979	4.5689	7.05502	6.24343	9.17446	2.08892	3.64565	10.0677
ESD	S-formylglutathione hydrolase	6.28928	6.2428	7.91942	10.0579	17.5755	4.64768	15.0769	5.05429	18.0738	10.7548	6.25334	9.87866	11.4505	7.23736	59.5006	5.15436	12.3461
ESYT1	Isoform of Q9BSJ8, Isoform 2 of Extended synaptotagmin-1	16.761	15.1314	15.6061	20.082	14.6726	16.9643	19.58	20.4108	20.7897	20.2816	33.94	30.9028	31.2409	24.3882	13.9869	25.1985	36.3855
ESYT2	Isoform of A0FGR8, Isoform 2 of Extended synaptotagmin-2	11.9207	11.8653	14.4575	14.2464	11.6254	9.45662	10.8921	8.10701	6.94782	11.0028	13.8584	21.0813	14.1196	14.102	7.3743	9.86223	21.4007
ETF1	Eukaryotic peptide chain release factor subunit 1	10.2071	9.15333	18.6377	9.8743	6.87396	3.90603	6.82829	4.70609	6.51851	13.0197	5.96639	9.07399	7.8131	10.2797	13.0173	5.97964	13.4347
ETFA	Electron transfer flavoprotein subunit alpha, mitochondrial	42.9043	126.701	60.9808	179.848	89.3525	138.145	219.186	152.006	77.5619	184.205	92.5363	207.347	155.964	290.189	112.285	106.115	241.673
ETFB	Electron transfer flavoprotein subunit beta	85.6645	116.541	84.819	271.585	128.088	162.12	220.705	214.418	79.8268	177.093	217.026	167.262	228.204	227.552	78.4189	117.483	178.825
ETFDH	Electron transfer flavoprotein-ubiquinone oxidoreductase, mitochondrial	111.661	81.9557	96.1819	201.561	152.97	89.7296	294.586	70.7556	94.8962	216.223	81.0797	222.432	183.199	193.723	53.0177	125.019	214.6
ETFRF1	Electron transfer flavoprotein regulatory factor 1	5.769	4.41346	6.30657	3.72311	3.25542	4.12891	2.83278	3.85177	5.45065	6.61457	3.18722	7.89584	4.49493	9.01115	7.69522	2.90653	7.59502
ETHE1	Persulfide dioxygenase ETHE1, mitochondrial	10.1181	12.4675	14.0505	14.9488	11.5082	7.64955	16.1999	6.1583	11.2655	19.9849	10.5806	18.5096	10.5469	15.4768	19.223	12.9234	23.1488
EVA1B	Protein eva-1 homolog B	0	0	0.933669	1.00001	0.885945	0.900401	0.758948	1.12321	0.722185	2.26569	0.866187	1.36301	1.22948	1.41736	0	0.717423	1.31168
EWSR1	RNA-binding protein EWS;Isoform of Q01844, Isoform 3 of RNA-binding protein EWS;Isoform of Q01844, Isoform 5 of RNA-binding protein EWS;Isoform of Q01844, Isoform 6 of RNA-binding protein EWS	4.71195	4.7302	3.65084	2.48603	4.09173	8.35095	7.04064	9.74452	2.64941	8.46645	7.48018	6.07433	5.93367	9.15757	2.06596	3.9662	4.70033
EXD2	Exonuclease 3'-5' domain-containing protein 2	0	1.10861	1.86979	1.63232	1.22154	2.03909	2.50214	2.4715	1.9781	1.84035	2.70217	4.21695	2.39234	3.6181	0	2.12557	2.67873
EXD3	Exonuclease mut-7 homolog	0	4.74656	0	0	0	0	11.6068	0	0.800292	2.33938	3.39322	0	7.54264	6.05174	0.865209	1.89354	4.91053
EXOC1	Exocyst complex component 1;Isoform of Q9NV70, Isoform 2 of Exocyst complex component 1	0.901365	1.56523	0.946222	1.69008	1.09675	1.22274	1.48358	1.34543	1.50816	1.848	1.84252	2.60194	2.17883	1.77003	1.30113	2.06955	3.10906
EXOC2	Exocyst complex component 2	41.505	31.5849	40.9631	44.1984	26.3334	57.1131	76.0523	44.0211	33.896	47.0437	51.0637	78.5956	69.0754	55.7032	21.9948	41.493	73.5409
EXOC3	Exocyst complex component 3	0	0	0	0	0	0	0	0	0	0	0	1.6592	0	0.594128	0	0	1.5154
EXOC4	Exocyst complex component 4	4.09261	3.28987	5.17241	5.61832	4.45048	3.1896	7.91065	3.10857	4.87246	3.84505	3.42777	9.72519	9.59231	6.62187	5.06082	4.74324	10.2572
EXOC5	Exocyst complex component 5	2.91676	2.30876	2.4643	1.98201	2.45418	2.18895	2.8603	1.64157	3.33617	2.82619	2.7278	3.98839	3.0572	3.24026	0	2.13784	4.73619
EXOC6B	Exocyst complex component 6B	0.534196	0.439217	2.20492	0.548664	0.22116	0.54618	0.791247	0.775641	0.682258	0.92385	1.13661	1.43813	1.5901	0	0.53991	0.642207	1.82276
EXOC7	Exocyst complex component 7;Isoform of Q9UPT5, Isoform 1 of Exocyst complex component 7;Isoform of Q9UPT5, Isoform 2 of Exocyst complex component 7;Isoform of Q9UPT5, Isoform 5 of Exocyst complex component 7;Isoform of Q9UPT5, Isoform 6 of Exocyst complex component 7	1.19289	1.76555	2.35284	1.3317	1.00094	1.46702	1.92403	1.51971	1.46774	1.08793	1.88457	2.86021	2.27522	2.41091	1.86604	1.84661	3.31077
EXOC8	Exocyst complex component 8	3.99485	3.07737	2.46884	4.10399	2.26729	3.23471	4.86533	3.46626	4.69839	5.10154	7.05524	5.48148	5.06318	5.96321	3.16972	6.81358	6.51221
EXOG	Nuclease EXOG, mitochondrial	0.529421	1.06067	0.576492	0.934773	0.95347	2.46567	3.19383	2.15457	0.742931	0.729796	1.73465	3.25835	2.17432	2.46139	0	1.11989	2.53413
EXOSC10	Exosome component 10;Isoform of Q01780, Isoform 2 of Exosome component 10	0	1.10912	0	1.70179	1.28708	0	0.826061	1.89043	0	0	2.23415	1.87758	0	0	0	0.789724	0
EXOSC2	Exosome complex component RRP4	1.77419	1.67756	2.17517	2.01468	1.28294	1.88164	2.67863	2.87581	1.51862	1.29987	1.66768	2.96141	2.44976	4.26266	0.751486	0.961336	3.21906
EXOSC4	Exosome complex component RRP41	0	0.82695	1.03203	1.74907	1.56678	1.74436	1.90157	1.87698	2.43472	2.24854	1.48119	3.05631	1.72871	2.91528	0.96188	2.22114	1.77963
EXOSC6	Exosome complex component MTR3	1.47367	1.65989	2.12517	2.26572	2.05119	1.7228	1.74226	2.36788	3.05386	1.48184	1.86042	2.67916	1.82022	2.74082	0.457216	2.05293	2.44134
EXOSC7	Exosome complex component RRP42	0.948639	1.17565	1.6527	1.80803	1.28294	1.6212	2.11842	2.09007	2.34449	1.46825	1.77383	2.50956	1.58717	2.63075	1.23146	1.46749	2.92031
EXOSC8	Exosome complex component RRP43	2.29668	2.96469	2.9532	4.27372	2.24754	2.2353	3.37841	3.14312	3.90795	3.55223	2.37362	4.7304	3.03895	4.8908	2.24296	2.81433	3.97675
EXOSC9	Exosome complex component RRP45;Isoform of Q06265, Isoform 2 of Exosome complex component RRP45	1.53851	1.1313	4.81275	1.45682	1.21845	1.91441	1.78736	1.44398	1.14459	0.980622	1.43091	3.66014	1.54498	0	0	0.63471	2.36608
EYA3	Eyes absent homolog 3;Isoform of Q99504, Isoform 4 of Eyes absent homolog 3;Isoform of Q99504, Isoform 5 of Eyes absent homolog 3	0.880645	0.966227	1.11197	1.46489	0.699209	0.758291	1.25693	1.51482	1.07659	1.09195	1.23484	2.06727	1.6437	2.31036	0	0	1.11668
EYA4	Eyes absent homolog 4;Isoform of O95677, Isoform 2 of Eyes absent homolog 4	1.09371	0.898213	1.08142	1.23511	0.491594	1.74838	1.52094	1.33925	2.1976	0	1.44915	1.89495	1.33114	1.99379	2.31537	1.29323	2.45148
EZR	Ezrin	10.1415	6.74807	22.8714	10.8095	8.38507	13.6124	12.9542	9.61525	12.6517	12.1032	16.0514	28.5363	27.3038	18.1126	18.6175	7.69618	42.6411
F10	Coagulation factor X	5.36415	8.68319	9.99064	5.88039	5.52213	3.40515	6.38281	4.1549	8.06211	7.28453	7.5199	9.72071	6.97627	17.0601	21.5289	12.6321	14.462
F11	Coagulation factor XI	0	3.44889	3.48252	16.4364	3.06342	1.82363	4.59846	2.69687	3.00434	5.19041	13.4187	3.84325	3.20128	9.20196	4.84196	6.25569	6.44954
F11R	Junctional adhesion molecule A	2.5439	1.69543	4.74562	3.07968	2.41717	1.38177	0	1.47048	0	0	2.01564	2.89867	2.75945	2.88789	0	0	2.91426
F12	Coagulation factor XII	6.97591	11.5553	15.2614	17.8323	5.65727	9.24349	17.0299	9.37045	15.4828	13.9445	23.9614	15.3038	12.3431	28.4041	22.7783	23.1886	28.4465
F12	Isoform of P00748, Coagulation factor XII	1.85439	3.88132	2.772	1.11817	2.48374	1.02408	4.99933	2.10213	0.619225	0	5.00394	2.31738	3.22792	5.94676	0.719981	1.34733	5.58507
F13A1	Coagulation factor XIII A chain	7.39947	9.45974	11.5078	10.9978	7.75545	8.26106	14.2992	8.85443	14.861	13.0407	16.3762	21.772	9.39341	12.4819	39.3932	12.8403	30.1459
F13B	Coagulation factor XIII B chain	0	0	0.276881	0	0	0	0.52013	0	0	0.40207	0	0	0	0.707588	1.93206	0	1.22385
F2	Prothrombin	2.95734	6.39704	4.4401	22.2027	6.09827	15.4823	30.3049	16.9809	11.1647	22.2332	43.0043	23.0993	19.576	41.0753	37.5164	26.1382	35.451
F5	Coagulation factor V	1.6761	1.58154	2.01416	1.15959	1.8168	1.12625	3.40261	1.86406	1.23979	1.79474	2.31959	1.94446	2.29099	4.40231	2.09759	4.02787	3.26309
F7	Coagulation factor VII;Isoform of P08709, Isoform B of Coagulation factor VII	0	0	0	0	0	0	0	0	0	0	0	0	0	23.2906	0	0	0
F8A3	40-kDa huntingtin-associated protein	1.06635	1.3664	1.36834	2.27513	1.63948	1.07532	2.59306	1.33156	0.925867	1.37531	1.38807	2.26881	1.85022	1.46683	3.33443	1.00896	2.69481
F9	Coagulation factor IX	0	0.474329	1.41904	10.7747	4.2639	1.60559	2.83147	1.8913	1.23637	2.2914	6.32284	2.96823	2.22394	5.38741	4.11548	2.454	5.89425
FAAH	Fatty-acid amide hydrolase 1	3.84238	1.82633	2.85163	3.8504	2.42386	5.49333	3.18575	6.54426	5.50489	5.10389	5.84133	7.69481	0	8.73937	5.1561	5.37496	7.68827
FAAP100	Fanconi anemia core complex-associated protein 100	0.534319	0.479269	0.707935	0.522644	0.519645	0.47439	0.569131	0.645298	0.543436	0.468707	0.851161	0.865562	0.914373	0.771046	0.184723	0.457273	0.868018
FABP3	Fatty acid-binding protein, heart	6.53433	4.43792	9.22344	4.78968	6.09126	4.54921	10.2403	5.52663	4.44783	6.35626	5.64562	8.52704	7.6988	11.9669	9.03901	0	11.0466
FABP4	Fatty acid-binding protein, adipocyte	0	5.4863	5.36158	4.13529	4.20927	4.01639	8.44136	3.44715	2.33372	3.64671	2.88876	6.72045	8.75837	5.30983	3.35368	2.83841	15.9709
FABP5	Fatty acid-binding protein 5	0.435914	0.522732	0.375485	0.48821	0.287877	0.993655	1.5996	0.624397	0	0	0.923234	1.59514	1.60518	1.4128	0	0	1.80148
FADD	FAS-associated death domain protein	21.1057	16.9855	26.1092	30.1791	21.7274	13.525	16.3686	20.4909	30.4543	42.0437	17.4507	25.0437	17.6288	30.6324	56.2239	31.6501	26.9357
FADS2	Acyl-CoA 6-desaturase	0	0	0	0.899925	0	0.584031	0	0	0	0	0	6.16308	0.61677	0	0	0	0.942603
FADS3	Fatty acid desaturase 3	0	0.834026	0	0	0	0	1.95215	0	0	0	0	1.53532	1.05931	0	0	0	0
FAF1	FAS-associated factor 1	10.1859	9.34285	11.8848	13.599	9.60964	10.6081	14.1095	13.0425	11.3462	11.4842	12.8089	16.7996	11.957	18.1543	8.83529	12.3502	16.7776
FAF2	FAS-associated factor 2	4.13905	3.97997	5.41244	5.11454	4.04117	6.93164	6.9201	7.25372	5.09505	5.12509	6.99378	11.1712	8.08767	10.4949	3.34288	5.79262	9.05792
FAH	Fumarylacetoacetase;Isoform of P16930, Isoform 2 of Fumarylacetoacetase	1.08069	0	0	0	1.28738	0	0	0	0	0	0	0	1.31106	1.7206	2.30739	0	0
FAHD1	Acylpyruvase FAHD1, mitochondrial	12.939	13.0461	14.0085	35.5391	28.1648	11.3798	25.0618	25.7372	21.7645	43.7826	14.8974	19.4267	19.7071	37.0408	25.4168	21.7158	16.7043
FAHD2A	Fumarylacetoacetate hydrolase domain-containing protein 2A	3.0903	6.08386	5.73447	8.08735	5.95672	3.44616	5.77713	3.26107	2.98984	7.16476	1.47134	5.19754	5.62112	4.55282	4.74702	2.97835	2.40674
FAHD2B	Fumarylacetoacetate hydrolase domain-containing protein 2B	0	0	0	0	0	0	0	0	0	0.157326	0	0	0	0	0	0	0
FAM114A1	Protein NOXP20	9.36701	9.36223	8.5348	10.7499	8.57052	7.65131	5.7018	7.58683	10.7189	10.1672	11.0284	16.9433	8.34494	10.7741	10.7925	10.8237	19.1482
FAM114A2	Protein FAM114A2	4.783	4.83704	5.91008	6.46407	4.63134	6.59228	5.56304	8.34758	2.81092	3.27191	8.45302	7.19115	6.07188	7.08566	4.94904	6.37786	7.64942
FAM118A	Protein FAM118A	0.505593	0.261204	0	0.562997	1.24196	0	0.979292	0	0.725853	0.804825	0.616044	0	1.11821	0.608948	0.771651	0.47095	1.25121
FAM118B	Protein FAM118B	3.65091	3.09157	3.87519	4.2974	3.62499	2.84666	3.34821	3.20303	2.61426	2.02722	3.33512	5.01416	4.74267	4.75752	1.5105	1.76879	5.65104
FAM120A	Constitutive coactivator of PPAR-gamma-like protein 1;Isoform of Q9NZB2, Isoform F of Constitutive coactivator of PPAR-gamma-like protein 1	12.9629	11.5553	13.0405	11.2981	10.3754	21.5743	24.2724	25.1629	13.2449	11.8632	21.838	31.1027	23.0581	30.0041	5.43277	14.8893	32.3541
FAM120B	Constitutive coactivator of peroxisome proliferator-activated receptor gamma	4.92154	4.18774	3.57844	4.56359	3.73428	6.00946	5.51839	8.81172	6.4811	4.12194	9.42132	9.8946	6.41391	9.70913	3.43891	5.46355	9.82718
FAM136A	Protein FAM136A	1.91294	2.84564	1.1676	4.87311	5.08987	5.04703	4.59317	8.20466	5.76698	4.56143	6.89464	3.68636	5.05153	4.13124	3.6452	4.86603	3.84263
FAM162A	Protein FAM162A	220.445	162.099	228.662	300.335	231.743	561.223	569.655	377.19	110.828	63.8707	347.706	366.774	418.238	500.357	49.1271	63.9256	258.66
FAM172A	Cotranscriptional regulator FAM172A;Isoform of Q8WUF8, Isoform 3 of Cotranscriptional regulator FAM172A	0	0.642361	0.990816	0.820175	0	0	0	0	0	0	0	3.00676	1.26947	1.91417	0	1.39693	2.84989
FAM177A1	Protein FAM177A1;Isoform of Q8N128, Isoform 2 of Protein FAM177A1	2.04833	1.51978	3.4292	4.04955	2.94447	4.46001	2.97723	4.41429	3.66816	4.04112	5.20969	5.81431	4.60705	5.49643	1.71562	3.75211	6.12673
FAM184A	Protein FAM184A;Isoform of Q8NB25, Isoform 3 of Protein FAM184A	0	0	0	17.2189	12.8946	0	0	0	0	0	0	0	0	0	8.81497	0	0
FAM185A	Protein FAM185A	2.16621	1.9746	3.07747	3.50111	2.48146	2.87102	3.36289	2.48176	2.71737	2.9282	2.48893	4.18985	2.96294	3.56271	2.49816	0	5.17045
FAM186B	Protein FAM186B	0	0	0	0	0	0.394853	1.3038	0	0	0	0	0	0	0	0	0	0
FAM20B	Glycosaminoglycan xylosylkinase	6.44319	0	0	3.34046	3.48102	5.97497	6.44633	9.31452	3.95411	2.36865	11.1048	3.97007	5.62371	6.29043	0	5.46481	2.55287
FAM210A	Protein FAM210A	19.0459	13.642	16.9003	30.3953	19.6023	15.3757	38.2747	29.0175	8.64268	17.4543	30.9893	24.1768	26.0389	38.4132	4.91271	15.5839	33.062
FAM210B	Protein FAM210B, mitochondrial	6.98555	9.14912	12.0502	7.64551	15.042	13.5686	43.6327	14.0495	0	0	16.6691	22.9508	27.1158	26.7966	0	1.92475	17.2476
FAM219A	Protein FAM219A;Isoform of Q8IW50, Isoform 2 of Protein FAM219A;Isoform of Q8IW50, Isoform 3 of Protein FAM219A;Isoform of Q8IW50, Isoform 4 of Protein FAM219A;Isoform of Q8IW50, Isoform 5 of Protein FAM219A;Isoform of Q8IW50, Isoform 6 of Protein FAM219A	0.300401	0.484595	0.272893	0.469252	0.424822	0	0.258948	0	0	0	0.797649	0.39003	0.184426	0.707914	0	0	0.706527
FAM234A	Protein FAM234A	1.00416	0.883852	1.68925	0.81697	0.819232	0.642741	0.742698	0.910879	0.953561	1.06513	0.851161	1.53284	0.639769	1.0127	1.13926	0.44903	1.32169
FAM241A	Uncharacterized protein FAM241A	0.101391	0	0	0.127059	0.182015	0	0.153749	0.329808	0.24857	0.144013	0	0.271455	0.128417	0.125858	0	0.137428	0
FAM241B	Protein FAM241B;Isoform of Q96D05, Isoform 2 of Protein FAM241B	1.58052	1.7546	2.22174	2.75681	0	8.8907	3.43251	9.27386	1.15093	2.32221	5.6171	4.15048	3.99138	6.60816	0.355403	2.29338	1.63957
FAM3A	Protein FAM3A;Isoform of P98173, Isoform 2 of Protein FAM3A;Isoform of P98173, Isoform 3 of Protein FAM3A	0.806308	0	0	0.96651	0.842378	3.29333	3.42225	4.37382	0	0	5.13939	1.11455	1.99032	1.84238	0	1.24702	1.66966
FAM3C	Protein FAM3C	21.7721	16.3787	18.9711	29.0072	21.7274	48.0879	23.0947	69.7366	46.2539	24.7971	73.4196	32.546	38.4967	40.2143	9.94308	41.8866	24.481
FAM50A	Protein FAM50A	1.16065	1.17268	0	1.9661	1.08046	1.75969	0	1.92913	1.67899	1.14736	2.43619	2.3545	2.40172	2.39707	0	1.22963	2.37481
FAM8A1	Protein FAM8A1	1.76482	1.61651	1.59365	0	1.55707	2.00648	1.5733	1.95686	0	0	0	2.64971	6.60577	2.3093	0	0	2.19649
FAM98A	Protein FAM98A	2.13501	2.2897	2.47169	2.18779	1.68425	3.2669	2.83278	3.51933	2.63359	2.24647	2.60683	5.14041	2.67315	2.92066	0.902653	2.0271	5.86447
FAM98B	Protein FAM98B	5.586	5.72769	8.81238	7.69319	4.90803	9.72827	7.89791	8.94871	10.2529	9.44716	9.00144	15.6855	8.11191	10.2419	7.08632	7.38372	19.7528
FAP	Prolyl endopeptidase FAP	3.43163	2.45403	6.45644	4.75123	3.30299	3.23397	3.2219	1.65676	3.75361	7.59804	3.03397	6.71735	5.7072	5.29761	9.27942	2.27497	10.2785
FARP1	FERM, ARHGEF and pleckstrin domain-containing protein 1;Isoform of Q9Y4F1, Isoform 2 of FERM, ARHGEF and pleckstrin domain-containing protein 1	1.65082	1.39213	1.63415	2.26572	1.40316	0.73221	1.71519	1.48034	0.89691	0.508864	1.85358	2.8807	1.97981	1.78271	1.00652	1.23873	3.34371
FARS2	Phenylalanine--tRNA ligase, mitochondrial	4.18409	3.18845	3.67954	4.50823	4.1726	3.65625	7.42527	6.91131	3.58714	5.8966	4.83183	5.80628	7.87813	7.34312	2.11895	6.40583	7.01502
FARSA	Phenylalanine--tRNA ligase alpha subunit	1.68152	2.57264	2.22072	2.33887	2.11791	3.40123	2.7632	3.04622	3.542	3.95095	2.44969	5.18439	3.14647	5.16631	2.53934	2.55138	6.66851
FARSB	Phenylalanine--tRNA ligase beta subunit	2.88935	3.06534	2.91335	2.5984	2.2213	2.40235	1.70731	2.08047	2.47656	3.37056	1.45349	4.42892	2.13611	2.45799	3.89602	1.39565	4.61242
FAS	Tumor necrosis factor receptor superfamily member 6;Isoform of P25445, Isoform 6 of Tumor necrosis factor receptor superfamily member 6	0	0	0.793584	1.28531	0	0	0.943218	0.410356	1.27394	0	0	0	0.842021	1.31972	0	1.76309	5.34231
FASN	Fatty acid synthase	4.45247	24.9735	12.3479	14.8664	6.69741	2.7292	25.5219	4.11776	14.9882	8.71568	3.10822	25.0033	41.5646	17.684	16.3539	11.6245	18.7382
FASTK	Fas-activated serine/threonine kinase;Isoform of Q14296, Isoform 2 of Fas-activated serine/threonine kinase;Isoform of Q14296, Isoform 4 of Fas-activated serine/threonine kinase	0	0	0	0	0	0.658925	0	0.643963	0.224931	0	0	0.933465	1.14031	1.05264	0	0	1.15566
FASTKD1	FAST kinase domain-containing protein 1, mitochondrial	0	0.302538	0	0	0	0.551107	1.01604	0.975575	0	0	0.581583	0	0.944546	0.909872	0	0.329212	1.26657
FASTKD2	FAST kinase domain-containing protein 2, mitochondrial	2.39884	2.5164	2.24126	3.15432	2.6749	4.13367	5.89539	4.45616	3.02656	3.22256	3.83365	5.71739	5.49191	5.35033	0	4.0186	5.99141
FASTKD5	FAST kinase domain-containing protein 5, mitochondrial	1.19454	1.55876	1.54487	1.932	1.8998	2.11902	4.90244	2.26653	1.16802	0.881458	2.90143	3.78093	4.01258	3.52842	0.512532	1.74371	4.22307
FAT3	Protocadherin Fat 3;Isoform of Q8TDW7, Isoform 3 of Protocadherin Fat 3	22.1718	18.8226	17.3338	25.2468	17.3184	17.3395	17.9478	17.0593	19.4244	15.3533	17.8571	28.5495	15.1783	26.1927	21.1993	12.9561	29.089
FAU	FAU ubiquitin-like and ribosomal protein S30	0	15.6596	15.9622	19.9483	6.28502	6.70866	18.4719	5.17798	27.1987	17.2982	6.58433	26.1516	9.02866	8.66125	23.4596	37.1001	35.5655
FBL	rRNA 2'-O-methyltransferase fibrillarin	2.52174	1.79879	2.03654	1.49488	2.01329	4.50128	2.98547	4.14153	3.29343	1.56495	3.78714	5.24805	2.86631	3.60313	0	1.07566	4.03858
FBLIM1	Filamin-binding LIM protein 1	0	0	0.53161	0	0.257458	0	0	0	0	0	0	1.42922	0.503296	0	0	0	0.422599
FBLN1	Fibulin-1	13.0227	14.5505	20.2812	15.9958	14.508	9.53972	17.4708	13.5008	18.2788	15.7762	17.6202	20.9796	23.962	25.2744	24.2394	14.1669	22.2602
FBLN1	Isoform of P23142, Isoform C of Fibulin-1	4.40962	4.23038	6.71264	5.29671	4.25605	3.41693	5.72153	4.1206	6.51851	5.29543	5.27487	7.35018	8.47468	8.67122	12.6771	5.42844	6.67158
FBLN2	Isoform of P98095, Isoform 2 of Fibulin-2	18.4035	19.583	37.1273	23.1796	14.5481	18.2069	16.4404	20.0244	20.0886	13.8772	17.4627	43.0624	22.7627	24.4782	9.62102	10.3365	24.8444
FBLN5	Fibulin-5	19.3375	13.8957	32.6507	16.9905	13.549	12.4118	15.7729	9.09412	18.4267	24.3557	10.0882	25.3453	17.6248	13.3101	9.52184	18.4746	14.6666
FBN1	Fibrillin-1	32.9762	98.2606	32.8922	22.8616	77.4118	139.295	115.216	500.104	126.313	263.755	180.931	32.7339	87.826	53.9983	11.3742	102.441	30.8837
FBN2	Fibrillin-2	0	8.62739	10.534	7.39105	6.75316	15.5502	24.6441	18.1493	25.897	39.5459	13.8169	12.5083	13.0264	16.1466	15.1922	33.2258	10.6962
FBP2	Fructose-1,6-bisphosphatase isozyme 2	5.85465	6.50548	12.277	16.0659	9.18136	4.009	3.35824	7.28888	4.78243	10.9346	5.55152	10.1064	2.68672	10.3295	19.0907	3.04983	15.8099
FBXL15	F-box/LRR-repeat protein 15	0.809843	0.763799	1.4914	0.924073	1.06416	1.29758	1.8349	1.41046	1.45127	2.01419	1.22015	1.75468	1.97389	2.18062	1.19597	2.03177	2.22602
FBXL19	F-box/LRR-repeat protein 19;Isoform of Q6PCT2, Isoform 2 of F-box/LRR-repeat protein 19	4.50091	4.28429	4.53934	3.16524	3.88067	2.68186	3.64932	4.79359	2.04338	3.67199	3.59842	3.53751	2.25436	5.68827	0	3.31799	3.26309
FBXL20	F-box/LRR-repeat protein 20	0.741141	1.0507	0.869547	0.641071	0.838121	0.673807	1.51814	1.47184	0.585394	1.00833	1.06001	1.38739	1.87682	2.27604	0.59023	1.387	1.50186
FBXL8	F-box/LRR-repeat protein 8	15.6856	14.1899	18.7281	14.1614	11.2592	14.1558	13.2377	6.65366	11.6211	15.4989	9.88125	23.0143	24.3458	17.0876	29.4456	11.0021	28.2442
FBXO21	F-box only protein 21;Isoform of O94952, Isoform 2 of F-box only protein 21	1.66303	1.80169	1.99615	1.97973	0.927485	1.82321	2.15235	2.71057	1.81949	1.55346	2.96901	2.94712	2.25073	3.71176	1.28624	1.31636	3.50049
FBXO22	F-box only protein 22	6.48038	5.03477	7.61892	7.96354	5.63517	3.35765	6.48503	4.69527	4.61051	5.90611	5.78911	8.28701	7.19322	7.42472	8.17374	4.18288	9.71021
FBXO3	F-box only protein 3	7.15321	5.75413	8.68147	8.03723	5.94165	7.97509	8.44136	10.7315	8.94023	8.27564	11.0665	14.5378	11.7984	12.24	5.53759	7.64672	13.5061
FBXO30	F-box only protein 30	0.596761	0.792099	0.714156	0.410021	0.484626	0.703454	0.709925	0.653372	0.662901	0	0.462926	1.27233	1.54783	0.741277	0.642571	0.571314	1.20512
FBXO40	F-box only protein 40	2.39608	1.68492	2.10036	2.66138	1.70023	3.25114	3.94832	5.02528	1.7384	3.60912	3.22338	4.41772	2.80171	5.76608	0	3.2906	4.08252
FBXO42	F-box only protein 42	1.40767	1.34859	1.8344	1.83995	1.00186	1.78006	2.40609	2.66416	2.17244	2.26883	2.7209	2.8093	2.00735	3.48883	2.28413	2.0501	4.17858
FBXO44	F-box only protein 44;Isoform of Q9H4M3, Isoform 2 of F-box only protein 44	5.79563	3.64653	6.93255	4.94432	4.42901	3.01603	5.00509	6.03199	4.91868	5.66241	3.58601	6.0131	4.83418	6.94993	4.47014	4.84145	9.06001
FBXO6	F-box only protein 6	8.04268	4.66637	5.89513	6.52689	4.66237	4.59024	7.50606	6.86848	4.48073	2.95258	6.38428	6.23588	4.76895	11.287	4.90932	3.6006	10.6863
FBXO7	F-box only protein 7	10.2825	16.6295	7.6841	17.0493	14.4147	0	14.8427	7.50517	12.4609	14.8765	12.5983	14.1938	9.7639	15.7863	21.7832	41.6654	11.3561
FBXW11	F-box/WD repeat-containing protein 11;Isoform of Q9UKB1, Isoform A of F-box/WD repeat-containing protein 11;Isoform of Q9UKB1, Isoform B of F-box/WD repeat-containing protein 11	0.606039	0	0.66358	0	0	1.11054	1.12024	1.0073	0	0	0.734534	1.59404	1.05882	1.9787	0	0	1.68822
FBXW2	F-box/WD repeat-containing protein 2;Isoform of Q9UKT8, Isoform 2 of F-box/WD repeat-containing protein 2	0	0	0	0	0.301861	0.591066	0	0.609341	0	0	0.623752	1.0023	0.509006	0.603782	0	0	0.921147
FBXW5	F-box/WD repeat-containing protein 5	0.747654	0	1.34584	1.45783	0.452801	0.968135	1.74748	1.72132	1.17395	1.9861	1.56427	1.32342	2.39565	2.04918	0.532502	1.77123	1.79155
FBXW9	F-box/WD repeat-containing protein 9;Isoform of Q5XUX1, Isoform 2 of F-box/WD repeat-containing protein 9	0	0	0	0	0	0	0	0	0	0	0.478864	0	0	0	0	0	0
FCER1G	High affinity immunoglobulin epsilon receptor subunit gamma	1.7358	2.65143	2.45863	3.69408	3.45945	7.69194	4.81629	10.4102	2.38863	1.72863	14.7847	9.55428	15.2659	12.8997	1.0107	8.07747	11.5566
FCGBP	IgGFc-binding protein	0	1.35575	1.45142	1.80845	0	2.31545	0	2.74575	1.1409	1.79598	2.59425	0	0	0	2.81722	1.12947	2.50281
FCGR2B	Isoform of P31994, Isoform IIB2 of Low affinity immunoglobulin gamma Fc region receptor II-b;Isoform of P31994, Isoform 5 of Low affinity immunoglobulin gamma Fc region receptor II-b	0.808725	1.08412	1.54701	1.41777	0.828337	0	1.36808	1.13439	1.53126	2.40936	0.930919	1.51146	2.46504	2.66858	3.7344	2.36143	3.09335
FCGRT	IgG receptor FcRn large subunit p51	1.92354	1.54946	3.20474	3.27195	2.07829	1.33486	2.35349	1.63591	2.33157	4.27466	1.93558	4.44118	2.34814	1.89008	6.48516	2.25619	5.88205
FCHO1	Isoform of O14526, Isoform 2 of F-BAR domain only protein 1	0	0	0	0	0	0	0	0	0	0	0	0	2.12629	0	0	0	3.2451
FCHO2	F-BAR domain only protein 2	0.460045	0.891824	0.803143	0.676716	0.433917	0.697808	1.64328	1.09688	1.14511	1.33383	1.52409	1.78196	1.64825	1.70915	0	1.57389	1.59598
FCN3	Ficolin-3	3.80803	6.35008	4.96356	4.91254	4.68174	0	6.06055	0	5.46574	6.59024	1.09701	7.28447	4.588	11.4099	13.9547	5.94532	10.4599
FCSK	L-fucose kinase;Isoform of Q8N0W3, Isoform 2 of L-fucose kinase	4.16199	4.16946	4.83719	5.39891	4.64416	4.3887	6.28944	5.91917	5.20054	5.93884	5.6016	6.70036	5.58243	8.4836	4.15739	5.68035	7.99335
FDFT1	Squalene synthase	1.40314	1.58628	1.67376	2.41828	2.15828	2.00233	2.94925	2.12844	1.92685	3.30295	2.03007	4.44732	2.94797	3.81839	1.70734	2.13292	3.21758
FDPS	Farnesyl pyrophosphate synthase;Isoform of P14324, Isoform 2 of Farnesyl pyrophosphate synthase	61.7306	56.439	71.9769	75.1461	69.2958	22.2965	42.5023	31.0929	35.5017	62.7916	45.7522	43.1815	28.0558	43.9421	55.1723	29.2129	82.5142
FDX1	Adrenodoxin, mitochondrial	16.493	17.2456	24.9743	27.6443	21.6574	12.8273	20.569	12.9318	8.27463	14.5983	17.6609	22.3511	17.4873	22.7028	13.8172	4.68032	30.6076
FDX2	Ferredoxin-2, mitochondrial	2.05968	1.52328	0	4.57621	1.64516	1.36942	2.44406	1.05041	0	0	1.39737	1.92308	1.14189	2.59526	0	0	3.70108
FDXR	Isoform of P22570, NADPH:adrenodoxin oxidoreductase, mitochondrial;Isoform of P22570, NADPH:adrenodoxin oxidoreductase, mitochondrial;Isoform of P22570, NADPH:adrenodoxin oxidoreductase, mitochondrial;Isoform of P22570, NADPH:adrenodoxin oxidoreductase, mitochondrial;Isoform of P22570, NADPH:adrenodoxin oxidoreductase, mitochondrial;Isoform of P22570, NADPH:adrenodoxin oxidoreductase, mitochondri…	0	0	0	0	0	0	0	0	0	0	0	0	0	0	0	0.905681	0
FDXR	NADPH:adrenodoxin oxidoreductase, mitochondrial;Isoform of P22570, Isoform 3 of NADPH:adrenodoxin oxidoreductase, mitochondrial;Isoform of P22570, Isoform 7 of NADPH:adrenodoxin oxidoreductase, mitochondrial	13.0017	9.43799	10.3203	8.4607	6.39156	8.92557	12.7677	7.27546	11.6426	10.4545	7.46469	13.2312	17.1208	11.452	18.9418	8.74934	12.4488
FECH	Ferrochelatase, mitochondrial;Isoform of P22830, Isoform 2 of Ferrochelatase, mitochondrial	37.6531	37.3061	28.9663	57.32	34.8905	47.4718	60.9554	65.3071	44.101	44.9574	58.6829	60.9955	59.2138	68.8621	25.5047	44.124	55.1479
FEM1A	Protein fem-1 homolog A	1.97879	1.13365	1.42132	2.6669	1.85356	2.33849	2.40665	2.69005	2.56713	1.77175	4.06454	2.73652	2.59432	2.5768	0	2.39704	3.70876
FEN1	Flap endonuclease 1	2.37247	2.52278	1.50312	3.33738	1.17275	2.97739	3.9702	3.57652	3.55507	1.64665	4.12869	5.17247	1.93608	4.01958	1.09906	3.1541	5.60569
FERMT2	Fermitin family homolog 2;Isoform of Q96AC1, Isoform 3 of Fermitin family homolog 2	21.4438	19.6462	26.7296	22.8932	19.8201	20.5322	18.9414	29.4144	21.2397	19.7789	30.2003	23.1845	12.8151	19.9609	16.9911	14.9408	23.245
FERMT3	Fermitin family homolog 3;Isoform of Q86UX7, Isoform 2 of Fermitin family homolog 3	8.25279	11.1014	9.35822	10.703	8.94761	5.35841	16.2784	9.91198	8.10305	8.3215	15.5386	26.6194	16.8975	39.5167	15.4853	19.8873	26.9605
FEZ2	Fasciculation and elongation protein zeta-2	2.50093	2.43209	2.95728	3.2427	2.2167	2.18643	3.06699	1.96861	3.81021	3.01718	3.24274	3.48898	2.36441	3.27778	3.76809	2.60301	5.27508
FGA	Fibrinogen alpha chain	375.752	525.024	462.374	295.465	313.117	191.397	572.021	464.687	241.796	360.58	777.521	261.155	318.144	453.817	405.995	540.848	822.297
FGB	Fibrinogen beta chain	197.925	248.702	233.88	149.385	151.184	103.881	277.212	254.074	128.958	166.84	403.471	142.856	144.086	238.111	186.948	228.705	466.69
FGD4	FYVE, RhoGEF and PH domain-containing protein 4	9.72077	9.14491	13.1611	12.3397	9.45817	10.4866	12.9662	11.2554	7.49288	8.13957	12.9185	14.0896	11.4373	18.3688	13.795	9.11119	17.1921
FGF13	Isoform of Q92913, Isoform 3 of Fibroblast growth factor 13	0.594978	0.764327	0	1.62445	0.598559	1.96941	0	3.06451	0.918224	0	2.49926	3.33041	4.73831	2.31569	0	0	2.90421
FGFR1	Fibroblast growth factor receptor 1;Isoform of P11362, Isoform 15 of Fibroblast growth factor receptor 1;Isoform of P11362, Isoform 19 of Fibroblast growth factor receptor 1;Isoform of P11362, Isoform 4 of Fibroblast growth factor receptor 1;Isoform of P11362, Isoform 20 of Fibroblast growth factor receptor 1;Isoform of P11362, Isoform 21 of Fibroblast growth factor receptor 1;Isoform of P11362, …	0	0	0	0.292487	0.164024	0.0998242	0	0.108858	0	0	0.224446	0.651926	0.431741	0	0	0	0.518357
[truncated: 4,469 more rows]
